# Supplementary material for: Global Trends in Scientific Output of Clinical Trials on Gastric Bypass: A Machine Learning–Based Bibliometric Study
Source: Research Square preprint supplement (doi:10.21203/rs.3.rs-8854344/v1), 2026-02-18
Supplement: Supplementary file 1 [file 50d213377ea4bf270c2a23d7.xlsx]

## Sheet: matrix
DOI	Total citations	Authors	Title
10.1056/NEJMoa066254	4040	SJÖSTRÖM L;NARBRO K;SJÖSTRÖM C;KARASON K;LARSSON B;WEDEL H;LYSTIG T;SULLIVAN M;BOUCHARD C;CARLSSON B;BENGTSSON C;DAHLGREN S;GUMMESSON A;JACOBSON P;KARLSSON J;LINDROOS A;LÖNROTH H;NÄSLUND I;OLBERS T;STENLÖF K;TORGERSON J;ÅGREN G;CARLSSON L	EFFECTS OF BARIATRIC SURGERY ON MORTALITY IN SWEDISH OBESE SUBJECTS
10.1056/NEJMoa035622	3975	SJÖSTRÖM L;LINDROOS A;PELTONEN M;TORGERSON J;BOUCHARD C;CARLSSON B;DAHLGREN S;LARSSON B;NARBRO K;SJÖSTRÖM C;SULLIVAN M;WEDEL H	LIFESTYLE DIABETES AND CARDIOVASCULAR RISK FACTORS 10 YEARS AFTER BARIATRIC SURGERY
10.1056/NEJMoa1600869	2140	SCHAUER P;BHATT D;KIRWAN J;WOLSKI K;AMINIAN A;BRETHAUER S;NAVANEETHAN S;SINGH R;POTHIER C;NISSEN S;KASHYAP S	BARIATRIC SURGERY VERSUS INTENSIVE MEDICAL THERAPY FOR DIABETES 5YEAR OUTCOMES
10.1056/NEJMoa012908	2137	CUMMINGS D;WEIGLE D;FRAYO R;BREEN P;MA M;DELLINGER E;PURNELL J	Plasma ghrelin levels after diet-induced weight loss or gastric bypass surgery
10.1056/NEJMoa1200225	1985	SCHAUER P;KASHYAP S;WOLSKI K;BRETHAUER S;KIRWAN J;POTHIER C;THOMAS S;ABOOD B;NISSEN S;BHATT D	BARIATRIC SURGERY VERSUS INTENSIVE MEDICAL THERAPY IN OBESE PATIENTS WITH DIABETES
10.1056/NEJMoa1200111	1601	MINGRONE G;PANUNZI S;DE G A;GUIDONE C;IACONELLI A;LECCESI L;NANNI ;GIUSEPPE G;POMP A;CASTAGNETO M;GHIRLANDA G;RUBINO F	BARIATRIC SURGERY VERSUS CONVENTIONAL MEDICAL THERAPY FOR TYPE 2 DIABETES
10.1056/NEJMoa1401329	1374	SCHAUER P;BHATT D;KIRWAN J;WOLSKI K;BRETHAUER S;NAVANEETHAN S;AMINIAN A;POTHIER C;KIM E;NISSEN S;KASHYAP S	BARIATRIC SURGERY VERSUS INTENSIVE MEDICAL THERAPY FOR DIABETES 3YEAR OUTCOMES
10.1001/jama.2011.1914	1202	SJÖSTRÖM L;PELTONEN M;JACOBSON P;SJÖSTRÖM C;KARASON K;WEDEL H;AHLIN S;ANVEDEN ;BENGTSSON C;BERGMARK G;BOUCHARD C;CARLSSON B;DAHLGREN S;KARLSSON J;LINDROOS A;LÖNROTH H;NARBRO K;NÄSLUND I;OLBERS T;SVENSSON P;CARLSSON L	BARIATRIC SURGERY AND LONGTERM CARDIOVASCULAR EVENTS
10.1016/S0140-6736(15)00075-6	1459	MINGRONE G;PANUNZI S;DE G A;GUIDONE C;IACONELLI A;NANNI G;CASTAGNETO M;BORNSTEIN S;RUBINO F	BARIATRICMETABOLIC SURGERY VERSUS CONVENTIONAL MEDICAL TREATMENT IN OBESE PATIENTS WITH TYPE 2 DIABETES: 5 YEAR FOLLOWUP OF AN OPENLABEL SINGLECENTRE RANDOMISED CONTROLLED TRIAL
10.1001/jama.2017.20897	1008	PETERLI R;WOLNERHANSSEN B;PETERS T;VETTER D;KROLL D;BORBELY Y;SCHULTES B;BEGLINGER C;DREWE J;SCHIESSER M;NETT ;PHILIPP P;BUETER M	EFFECT OF LAPAROSCOPIC SLEEVE GASTRECTOMY VS LAPAROSCOPIC ROUXENY GASTRIC BYPASS ON WEIGHT LOSS IN PATIENTS WITH MORBID OBESITY THE SMBOSS RANDOMIZED CLINICAL TRIAL
10.1097/00000658-200109000-00002	950	NGUYEN N;GOLDMAN C;ROSENQUIST C;ARANGO A;COLE C J;LEE S;WOLFE B	Laparoscopic Versus Open Gastric Bypass: A Randomized Study of Outcomes, Quality of Life, and Costs
10.1001/jama.2017.20313	793	SALMINEN P;HELMIO M;OVASKA J;JUUTI A;LEIVONEN M;PEROMAA-HAAVISTO P;HURME S;SOINIO ;MINNA M;NUUTILA P;VICTORZON M	EFFECT OF LAPAROSCOPIC SLEEVE GASTRECTOMY VS LAPAROSCOPIC ROUXENY GASTRIC BYPASS ON WEIGHT LOSS AT 5 YEARS AMONG PATIENTS WITH MORBID OBESITY THE SLEEVEPASS RANDOMIZED CLINICAL TRIAL
10.1001/jama.2013.5835	671	IKRAMUDDIN S;KORNER J;LEE W;CONNETT J;E. E;INABNET W;BILLINGTON C;THOMAS ;AVIS J A;LESLIE D;CHONG K;JEFFERY R;AHMED L;VELLA A;CHUANG L;BESSLER ;MARC M;SARR M;SWAIN J;LAQUA P;JENSEN M;BANTLE J	ROUXENY GASTRIC BYPASS VS INTENSIVE MEDICAL MANAGEMENT FOR THE CONTROL OF TYPE 2 DIABETES HYPERTENSION AND HYPERLIPIDEMIA THE DIABETES SURGERY STUDY RANDOMIZED CLINICAL TRIAL
10.1097/SLA.0b013e3180caa3e3	653	LE R C;WELBOURN R;WERLING M;OSBORNE A;KOKKINOS A;LAURENIUS A;LÖNROTH H;FÄNDRIKS L;GHATEI M;BLOOM S;OLBERS T	Gut hormones as mediators of appetite and weight loss after Roux-en-Y gastric bypass
10.1056/NEJMoa1112082	653	CARLSSON L;PELTONEN M;AHLIN S;ANVEDEN ;BOUCHARD C;CARLSSON B;JACOBSON P;LÖNROTH H;MAGLIO C;NÄSLUND I;PIRAZZI C;ROMEO S;SJÖHOLM K;SJÖSTRÖM E;WEDEL H;SVENSSON P;SJÖSTRÖM L	BARIATRIC SURGERY AND PREVENTION OF TYPE 2 DIABETES IN SWEDISH OBESE SUBJECTS
10.1016/j.cmet.2015.07.009	647	TREMAROLI V;KARLSSON F;WERLING M;STÅHLMAN M;KOVATCHEVA-DATCHARY P;OLBERS T;FÄNDRIKS L;LE R C;NIELSEN J;BÄCKHED F	ROUXENY GASTRIC BYPASS AND VERTICAL BANDED GASTROPLASTY INDUCE LONGTERM CHANGES ON THE HUMAN GUT MICROBIOME CONTRIBUTING TO FAT MASS REGULATION
10.1056/NEJMoa1506699	604	INGE T;COURCOULAS A;JENKINS T;MICHALSKY M;HELMRATH M;BRANDT M;HARMON C;ZELLER M;CHEN M;XANTHAKOS S;HORLICK M;BUNCHER C	WEIGHT LOSS AND HEALTH STATUS 3 YEARS AFTER BARIA TRIC SURGERY IN ADOLESCENTS
10.1210/jc.2007-2851	601	LAFERRERE B;TEIXEIRA J;MCGINTY J;TRAN H;EGGER J;COLARUSSO A;KOVACK B;BAWA ;BAANI B;KOSHY N;LEE H;YAPP K;OLIVAN ;BLANCA B	EFFECT OF WEIGHT LOSS BY GASTRIC BYPASS SURGERY VERSUS HYPOCALORIC DIET ON GLUCOSE AND INCRETIN LEVELS IN PATIENTS WITH TYPE 2 DIABETES
10.1097/01.sla.0000133117.12646.48	567	RUBINO F;GAGNER M;GENTILESCHI P;KINI S;FUKUYAMA S;FENG J;DIAMOND E	The Early Effect of the Roux-en-Y Gastric Bypass on Hormones Involved in Body Weight Regulation and Glucose Metabolism
10.1097/SLA.0b013e3181ae32e3	528	PETERLI R;WÖLNERHANSSEN B;PETERS T;DEVAUX N;KERN B;CHRISTOFFEL-COURTIN C;DREWE J;VON F M;BEGLINGER C	IMPROVEMENT IN GLUCOSE METABOLISM AFTER BARIATRIC SURGERY: COMPARISON OF LAPAROSCOPIC ROUXENY GASTRIC BYPASS AND LAPAROSCOPIC SLEEVE GASTRECTOMY: A PROSPECTIVE RANDOMIZED TRIAL
10.1007/s11695-012-0622-3	443	PETERLI R;STEINERT R;WOELNERHANSSEN B;PETERS T;CHRISTOFFEL-COURTIN C;GASS M;KERN B;VON F M;BEGLINGER C	METABOLIC AND HORMONAL CHANGES AFTER LAPAROSCOPIC ROUXENY GASTRIC BYPASS AND SLEEVE GASTRECTOMY: A RANDOMIZED PROSPECTIVE TRIAL
10.1097/01.sla.0000167762.46568.98	433	LEE W;YU P;WANG W;CHEN T;WEI P;HUANG M	LAPAROSCOPIC ROUXENY VERSUS MINIGASTRIC BYPASS FOR THE TREATMENT OF MORBID OBESITY A PROSPECTIVE RANDOMIZED CONTROLLED CLINICAL TRIAL
10.1371/journal.pone.0189190	407	FERMONT J;BLAZEBY J;ROGERS C;WORDSWORTH S;BY-BAND-SLEEVE S M G B	THE EQ5D5L IS A VALID APPROACH TO MEASURE HEALTH RELATED QUALITY OF LIFE IN PATIENTS UNDERGOING BARIATRIC SURGERY
10.1001/archsurg.2010.326	403	LEE W;CHONG K;SER K;LEE Y;CHEN S;CHEN J;TSAI M;CHUANG ;LEE-MING L	GASTRIC BYPASS VS SLEEVE GASTRECTOMY FOR TYPE 2 DIABETES MELLITUS A RANDOMIZED CONTROLLED TRIAL
10.1016/S0140-6736(19)30475-1	348	ROBERT M;ESPALIEU P;PELASCINI E;CAIAZZO R;STERKERS A;KHAMPHOMMALA L;POGHOSYAN T;CHEVALLIER J;MALHERBE V;CHOUILLARD E;RECHE F;TORCIVIA A;MAUCORT-BOULCH D;BIN-DOREL S;LANGLOIS-JACQUES C;DELAUNAY D;PATTOU F;DISSE E	EFFICACY AND SAFETY OF ONE ANASTOMOSIS GASTRIC BYPASS VERSUS ROUXENY GASTRIC BYPASS FOR OBESITY (YOMEGA): A MULTICENTRE RANDOMISED OPENLABEL NONINFERIORITY TRIAL
10.1126/scitranslmed.3002043	333	LAFERRÈRE B;REILLY D;ARIAS S;SWERDLOW N;GORROOCHURN P;BAWA B;BOSE M;TEIXEIRA J;STEVENS R;WENNER B;BAIN J;MUEHLBAUER M;HAQQ A;LIEN L;SHAH S;SVETKEY L;NEWGARD C	DIFFERENTIAL METABOLIC IMPACT OF GASTRIC BYPASS SURGERY VERSUS DIETARY INTERVENTION IN OBESE DIABETIC SUBJECTS DESPITE IDENTICAL WEIGHT LOSS
10.1001/jamasurg.2015.1534	322	SCHIAVON C;BHATT D;IKEOKA D;SANTUCCI ;V E;SANTOS R;DAMIANI L;OLIVEIRA J;MACHADO R;HALPERN H;MONTEIRO F;NOUJAIM P;COHEN ;RICARDO R;DE S M;AMODEO C;BORTOLOTTO L;A. A;BERWANGER O;CAVALCANTI A;DRAGER ;LUCIANO F L	THREEYEAR OUTCOMES OF BARIATRIC SURGERY IN PATIENTS WITH OBESITY AND HYPERTENSION A RANDOMIZED CLINICAL TRIAL
10.1097/SLA.0b013e3182a67426	316	PETERLI R;BORBELY Y;KERN B;GASS M;PETERS T;THURNHEER M;SCHULTES B;LAEDERACH ;KURT K;BUETER M;SCHIESSER M	EARLY RESULTS OF THE SWISS MULTICENTRE BYPASS OR SLEEVE STUDY (SMBOSS) A PROSPECTIVE RANDOMIZED TRIAL COMPARING LAPAROSCOPIC SLEEVE GASTRECTOMY AND ROUXENY GASTRIC BYPASS
10.1007/s11695-011-0479-x	309	KEHAGIAS I;KARAMANAKOS S;ARGENTOU M;KALFARENTZOS F	RANDOMIZED CLINICAL TRIAL OF LAPAROSCOPIC ROUXENY GASTRIC BYPASS VERSUS LAPAROSCOPIC SLEEVE GASTRECTOMY FOR THE MANAGEMENT OF PATIENTS WITH BMI \&LT; 50 KG/M<SUP>2</SUP>
10.1097/01.sla.0000218085.25902.f8	304	OLBERS T;BJORKMAN S;LINDROOS A;MALECKAS ;ALMANTAS A;LONN L;SJÖSTRÖM L;LONROTH H	BODY COMPOSITION DIETARY INTAKE AND ENERGY EXPENDITURE AFTER LAPAROSCOPIC ROUXENY GASTRIC BYPASS AND LAPAROSCOPIC VERTICAL BANDED GASTROPLASTY : A RANDOMIZED CLINICAL TRIAL
10.1097/SLA.0b013e3181be34e7	294	FLEISCHER J;STEIN E;BESSLER M;DELLA B M;RESTUCCIA N;OLIVERO-RIVERA L;MCMAHON D;SILVERBERG S	THE DECLINE IN HIP BONE DENSITY AFTER GASTRIC BYPASS SURGERY IS ASSOCIATED WITH EXTENT OF WEIGHT LOSS
10.1016/j.soard.2014.02.044	293	COURCOULAS A;BELLE S;NEIBERG R;PIERSON S;EAGLETON J;KALARCHIAN M;DELANY J;LANG W;JAKICIC J	THREEYEAR OUTCOMES OF BARIATRIC SURGERY VS LIFESTYLE INTERVENTION FOR TYPE 2 DIABETES MELLITUS TREATMENT A RANDOMIZED CLINICAL TRIAL
10.1152/AJPENDO.00073.2012	285	JØRGENSEN N;JACOBSEN S;DIRKSEN C;BOJSEN-MØLLER K;NAVER L;HVOLRIS L;CLAUSEN T;WULFF B;WORM D;LINDQVIST H D;MADSBAD S;HOLST J	ACUTE AND LONGTERM EFFECTS OF ROUXENY GASTRIC BYPASS ON GLUCOSE METABOLISM IN SUBJECTS WITH TYPE 2 DIABETES AND NORMAL GLUCOSE TOLERANCE
10.1097/SLA.0b013e3181bdfbff	263	SCHOUTEN R;RIJS C;BOUVY N;HAMEETEMAN W;KOEK G;JANSSEN I;GREVE ;JAN-WILLEM M J	A MULTICENTER RANDOMIZED EFFICACY STUDY OF THE ENDOBARRIER GASTROINTESTINAL LINER FOR PRESURGICAL WEIGHT LOSS PRIOR TO BARIATRIC SURGERY
10.1097/01.sla.0000120071.75691.1f	262	LUJÁN J;FRUTOS M;HERNÁNDEZ Q;LIRON R;CUENCA J;VALERO G;PARRILLA P	LAPAROSCOPIC VERSUS OPEN GASTRIC BYPASS IN THE TREATMENT OF MORBID OBESITY: A RANDOMIZED PROSPECTIVE STUDY
10.2337/db13-0022	259	JØRGENSEN N;DIRKSEN C;BOJSEN-MØLLER K;JACOBSEN S;WORM D;HANSEN D;KRISTIANSEN V;NAVER L;MADSBAD S;HOLST J	EXAGGERATED GLUCAGONLIKE PEPTIDE 1 RESPONSE IS IMPORTANT FOR IMPROVED ΒCELL FUNCTION AND GLUCOSE TOLERANCE AFTER ROUXENY GASTRIC BYPASS IN PATIENTS WITH TYPE 2 DIABETES
10.1186/S13073-016-0312-1	258	PALLEJA A;KASHANI A;ALLIN K;NIELSEN T;ZHANG C;LI Y;BRACH T;LIANG S;FENG Q;JØRGENSEN N;BOJSEN-MØLLER K;DIRKSEN C;BURGDORF K;HOLST J;MADSBAD S;WANG J;PEDERSEN O;HANSEN T;ARUMUGAM M	ROUXENY GASTRIC BYPASS SURGERY OF MORBIDLY OBESE PATIENTS INDUCES SWIFT AND PERSISTENT CHANGES OF THE INDIVIDUAL GUT MICROBIOTA
10.1001/JAMAPEDIATRICS.2013.4296	255	INGE T;ZELLER M;JENKINS T;HELMRATH M;BRANDT M;MICHALSKY M;HARMON C;COURCOULAS A;HORLICK M;XANTHAKOS S;DOLAN L;MITSNEFES M;BARNETT S;BUNCHER R	PERIOPERATIVE OUTCOMES OF ADOLESCENTS UNDERGOING BARIATRIC SURGERY: THE TEENLONGITUDINAL ASSESSMENT OF BARIATRIC SURGERY (TEENLABS) STUDY
10.2337/dc12-1596	254	KASHYAP S;BHATT D;WOLSKI K;WATANABE R;ABDUL-GHANI M;ABOOD B;POTHIER C;BRETHAUER S;NISSEN S;GUPTA ;MANJULA M;KIRWAN J;SCHAUER P	METABOLIC EFFECTS OF BARIATRIC SURGERY IN PATIENTS WITH MODERATE OBESITY AND TYPE 2 DIABETES ANALYSIS OF A RANDOMIZED CONTROL TRIAL COMPARING SURGERY WITH INTENSIVE MEDICAL TREATMENT
10.1210/JC.2012-3736	254	ROUSKAS K;CAUCHI S;RAVERDY V;YENGO L;FROGUEL P;PATTOU F	WEIGHT LOSS INDEPENDENT ASSOCIATION OF TCF7 L2 GENE POLYMORPHISM WITH FASTING BLOOD GLUCOSE AFTER ROUXENY GASTRIC BYPASS IN TYPE 2 DIABETIC PATIENTS
10.1016/S2213-8587(16)30424-7	250	OLBERS T;BEAMISH A;GRONOWITZ E;FLODMARK C;DAHLGREN J;BRUZE G;EKBOM K;FRIBERG P;GÖTHBERG G;JÄRVHOLM K;KARLSSON J;MÅRILD S;NEOVIUS M;PELTONEN M;MARCUS C	LAPAROSCOPIC ROUXENY GASTRIC BYPASS IN ADOLESCENTS WITH SEVERE OBESITY (AMOS): A PROSPECTIVE 5YEAR SWEDISH NATIONWIDE STUDY
10.1038/IJO.2009.254	248	KASHYAP S;DAUD S;KELLY K;GASTALDELLI A;WIN H;BRETHAUER S;KIRWAN J;SCHAUER P	ACUTE EFFECTS OF GASTRIC BYPASS VERSUS GASTRIC RESTRICTIVE SURGERY ON BETACELL FUNCTION AND INSULINOTROPIC HORMONES IN SEVERELY OBESE PATIENTS WITH TYPE 2 DIABETES
10.1007/s00125-016-3903-x	246	CUMMINGS D;ARTERBURN D;WESTBROOK E;KUZMA J;STEWART S;CHAN C;BOCK ;STEVEN N S;LANDERS J;KRATZ M;FOSTER-SCHUBERT ;KAREN E K;FLUM D	GASTRIC BYPASS SURGERY VS INTENSIVE LIFESTYLE AND MEDICAL INTERVENTION FOR TYPE 2 DIABETES: THE CROSSROADS RANDOMISED CONTROLLED TRIAL
10.1001/jama.2017.20813	241	IKRAMUDDIN S;KORNER J;LEE W;THOMAS A;J. J;CONNETT J;BANTLE J;LESLIE D;WANG Q;INABNET W;JEFFERY R;CHONG ;KEONG K;CHUANG L;JENSEN M;VELLA A;AHMED L;BELANI K;BILLINGTON C	LIFESTYLE INTERVENTION AND MEDICAL MANAGEMENT WITH VS WITHOUT ROUXENY GASTRIC BYPASS AND CONTROL OF HEMOGLOBIN A1C LDL CHOLESTEROL AND SYSTOLIC BLOOD PRESSURE AT 5 YEARS IN THE DIABETES SURGERY STUDY
10.1016/j.soard.2022.10.036	241	SAARINEN I;GRONROOS S;HURME S;PETERLI R;HELMIO M;BUETER M;STRANDBERG M;WOLNERHANSSEN B;SALMINEN P	VALIDATION OF THE INDIVIDUALIZED METABOLIC SURGERY SCORE FOR BARIATRIC PROCEDURE SELECTION IN THE MERGED DATA OF TWO RANDOMIZED CLINICAL TRIALS (SLEEVEPASS AND SMBOSS)
10.2337/db12-1762	240	ABOELELA M;ALREFAEY A	VENTILATION STRATEGIES AND POSTOPERATIVE PAIN IN LAPAROSCOPIC CHOLECYSTECTOMY: PULMONARY RECRUITMENT MANEUVER VERSUS EXTENDED HYPERVENTILATION: A PROSPECTIVE RANDOMIZED STUDY
10.1016/j.soard.2013.12.016	239	GISONDI P;DEL G M;DI F V;ZAMBONI M;GIROLOMONI G	WEIGHT LOSS IMPROVES THE RESPONSE OF OBESE PATIENTS WITH MODERATETOSEVERE CHRONIC PLAQUE PSORIASIS TO LOWDOSE CYCLOSPORINE THERAPY: A RANDOMIZED CONTROLLED INVESTIGATORBLINDED CLINICAL TRIAL
10.1007/S11695-008-9438-6	236	JACKNESS C;KARMALLY W;FEBRES G;CONWELL I;AHMED L;BESSLER M;MCMAHON D;KORNER J	VERY LOWCALORIE DIET MIMICS THE EARLY BENEFICIAL EFFECT OF ROUXENY GASTRIC BYPASS ON INSULIN SENSITIVITY AND ΒCELL FUNCTION IN TYPE 2 DIABETIC PATIENTS
10.1016/S0140-6736(15)01126-5	236	STENBERG E;SZABO E;ÅGREN G;OTTOSSON J;MARSK R;LÖNROTH H;BOMAN L;MAGNUSON A;THORELL A;NÄSLUND I	CLOSURE OF MESENTERIC DEFECTS IN LAPAROSCOPIC GASTRIC BYPASS: A MULTICENTRE RANDOMISED PARALLEL OPENLABEL TRIAL
10.1007/s11695-016-2437-0	236	LUGER M;KRUSCHITZ R;KIENBACHER C;TRAUSSNIGG S;LANGER F;PRAGER G;SCHINDLER K;KALLAY E;HOPPICHLER F;TRAUNER M;KREBS M;MARCULESCU R;LUDVIK ;BERNHARD B	VITAMIN D3 LOADING IS SUPERIOR TO CONVENTIONAL SUPPLEMENTATION AFTER WEIGHT LOSS SURGERY IN VITAMIN DDEFICIENT MORBIDLY OBESE PATIENTS: A DOUBLEBLIND RANDOMIZED PLACEBOCONTROLLED TRIAL
10.1007/s11695-016-2399-2	234	MURPHY R;TSAI P;JÜLLIG M;LIU A;PLANK L;BOOTH M	DIFFERENTIAL CHANGES IN GUT MICROBIOTA AFTER GASTRIC BYPASS AND SLEEVE GASTRECTOMY BARIATRIC SURGERY VARY ACCORDING TO DIABETES REMISSION
10.1016/j.soard.2006.11.006	233	ALAMI R;MORTON J;SCHUSTER R;LIE J;SANCHEZ B;PETERS A;CURET M	IS THERE A BENEFIT TO PREOPERATIVE WEIGHT LOSS IN GASTRIC BYPASS PATIENTS? A PROSPECTIVE RANDOMIZED TRIAL
10.1016/S2213-8587(16)30315-1	233	INGE T;JENKINS T;XANTHAKOS S;DIXON J;DANIELS S;ZELLER M;HELMRATH M	LONGTERM OUTCOMES OF BARIATRIC SURGERY IN ADOLESCENTS WITH SEVERE OBESITY (FABS5+): A PROSPECTIVE FOLLOWUP ANALYSIS
10.1381/096089203322509237	231	SERAFINI F;ANDERSON W;GHASSEMI P;POKLEPOVIC J;MURR M	THE UTILITY OF CONTRAST STUDIES AND DRAINS IN THE MANAGEMENT OF PATIENTS AFTER ROUXENY GASTRIC BYPASS
10.1097/SLA.0b013e3181b92480	227	NGUYEN N;SLONE J;NGUYEN X;HARTMAN J;HOYT D	A PROSPECTIVE RANDOMIZED TRIAL OF LAPAROSCOPIC GASTRIC BYPASS VERSUS LAPAROSCOPIC ADJUSTABLE GASTRIC BANDING FOR THE TREATMENT OF MORBID OBESITY: OUTCOMES QUALITY OF LIFE AND COSTS
10.1001/jamasurg.2022.2229	227	SALMINEN P;GRONROOS S;HELMIO M;HURME S;JUUTI A;JUUSELA R;PEROMAA-HAAVISTO P;LEIVONEN M;NUUTILA P;OVASKA J	EFFECT OF LAPAROSCOPIC SLEEVE GASTRECTOMY VS ROUXENY GASTRIC BYPASS ON WEIGHT LOSS COMORBIDITIES AND REFLUX AT 10 YEARS IN ADULT PATIENTS WITH OBESITY THE SLEEVEPASS RANDOMIZED CLINICAL TRIAL
10.2337/DB13-1307	224	BOJSEN-MØLLER K;DIRKSEN C;JØRGENSEN N;JACOBSEN S;SERUP A;ALBERS P;HANSEN D;WORM D;NAVER L;KRISTIANSEN V;WOJTASZEWSKI J;KIENS B;HOLST J;RICHTER E;MADSBAD S	EARLY ENHANCEMENTS OF HEPATIC AND LATER OF PERIPHERAL INSULIN SENSITIVITY COMBINED WITH INCREASED POSTPRANDIAL INSULIN SECRETION CONTRIBUTE TO IMPROVED GLYCEMIC CONTROL AFTER ROUXENY GASTRIC BYPASS
10.1161/CIRCULATIONAHA.117.032130	222	SCHIAVON C;BERSCH-FERREIRA A;SANTUCCI E;OLIVEIRA J;TORREGLOSA C;BUENO P;FRAYHA J;SANTOS R;DAMIANI L;NOUJAIM P;HALPERN H;MONTEIRO F;COHEN R;UCHOA C;DE S M;AMODEO C;BORTOLOTTO L;IKEOKA D;DRAGER L;CAVALCANTI A;BERWANGER O	EFFECTS OF BARIATRIC SURGERY IN OBESE PATIENTS WITH HYPERTENSION THE GATEWAY RANDOMIZED TRIAL (GASTRIC BYPASS TO TREAT OBESE PATIENTS WITH STEADY HYPERTENSION)
10.1001/jamasurg.2014.514	221	HALPERIN F;DING S;SIMONSON D;PANOSIAN J;GOEBEL-FABBRI A;WEWALKA M;HAMDY O;ABRAHAMSON M;CLANCY K;FOSTER ;KATHLEEN K;LAUTZ D;VERNON A;GOLDFINE A	ROUXENY GASTRIC BYPASS SURGERY OR LIFESTYLE WITH INTENSIVE MEDICAL MANAGEMENT IN PATIENTS WITH TYPE 2 DIABETES FEASIBILITY AND 1YEAR RESULTS OF A RANDOMIZED CLINICAL TRIAL
10.1152/ajpregu.00139.2011	217	LE R C;BUETER M;THEIS N;WERLING M;ASHRAFIAN H;LOEWENSTEIN C;ATHANASIOU T;BLOOM S;SPECTOR A;OLBERS T;LUTZ ;THOMAS A T	GASTRIC BYPASS REDUCES FAT INTAKE AND PREFERENCE
10.2337/dc09-2107	215	ISBELL J;TAMBOLI R;HANSEN E;SALIBA J;DUNN J;PHILLIPS S;MARKS-SHULMAN P;ABUMRAD N	THE IMPORTANCE OF CALORIC RESTRICTION IN THE EARLY IMPROVEMENTS IN INSULIN SENSITIVITY AFTER ROUXENY GASTRIC BYPASS SURGERY
10.1016/S1072-7515(01)00822-5	214	NGUYEN N;LEE S;GOLDMAN C;FLEMING N;ARANGO A;MCFALL R;WOLFE B	COMPARISON OF PULMONARY FUNCTION AND POSTOPERATIVE PAIN AFTER LAPAROSCOPIC VERSUS OPEN GASTRIC BYPASS: A RANDOMIZED TRIAL
10.1016/j.soard.2006.12.005	212	ANGRISANI L;LORENZO M;BORRELLI V	LAPAROSCOPIC ADJUSTABLE GASTRIC BANDING VERSUS ROUXENY GASTRIC BYPASS: 5YEAR RESULTS OF A PROSPECTIVE RANDOMIZED TRIAL
10.1001/archsurg.2011.273	211	VAN N Y;DAMBRAUSKAS Z;CAMPILLO-SOTO A;VAN D F;WIEZER R;JANSSEN I;KRAMER M;THORELL A	PREOPERATIVE VERY LOWCALORIE DIET AND OPERATIVE OUTCOME AFTER LAPAROSCOPIC GASTRIC BYPASS: A RANDOMIZED MULTICENTER STUDY
10.1097/SLA.0000000000000945	208	CAIAZZO R;LASSAILLY G;LETEURTRE E;BAUD G;VERKINDT H;RAVERDY V;BUOB D;PIGEYRE M;MATHURIN P;PATTOU F	ROUXENY GASTRIC BYPASS VERSUS ADJUSTABLE GASTRIC BANDING TO REDUCE NONALCOHOLIC FATTY LIVER DISEASE: A 5YEAR CONTROLLED LONGITUDINAL STUDY
10.1097/01.sla.0000197381.01214.76	207	HORWITZ D;SAUNDERS J;UDE-WELCOME A;SCHMIDT ;ANN M A;DUNN V;PACHTER H;PARIKH M	THREEYEAR FOLLOWUP COMPARING METABOLIC SURGERY VERSUS MEDICAL WEIGHT MANAGEMENT IN PATIENTS WITH TYPE 2 DIABETES AND BMI 3035 THE ROLE OF SRAGE BIOMARKER AS PREDICTOR OF SATISFACTORY OUTCOMES
10.1016/j.soard.2020.11.019	205	PUZZIFERRI N;AUSTRHEIM-SMITH I;WOLFE B;WILSON S;NGUYEN N	THREEYEAR FOLLOWUP OF A PROSPECTIVE RANDOMIZED TRIAL COMPARING LAPAROSCOPIC VERSUS OPEN GASTRIC BYPASS
10.1152/ajpregu.00291.2016	203	DEMARIA E;MURR M;BYRNE T;BLACKSTONE R;GRANT J;BUDAK A;WOLFE L	VALIDATION OF THE OBESITY SURGERY MORTALITY RISK SCORE IN A MULTICENTER STUDY PROVES IT STRATIFIES MORTALITY RISK IN PATIENTS UNDERGOING GASTRIC BYPASS FOR MORBID OBESITY
10.1053/j.gastro.2013.11.044	201	SALEHI M;GASTALDELLI A;D'ALESSIO D	BLOCKADE OF GLUCAGONLIKE PEPTIDE 1 RECEPTOR CORRECTS POSTPRANDIAL HYPOGLYCEMIA AFTER GASTRIC BYPASS
10.1001/jamasurg.2014.467	199	COURCOULAS A;GOODPASTER B;EAGLETON J;BELLE S;KALARCHIAN M;LANG W;TOLEDO ;FREDERICO G S F;JAKICIC J	SURGICAL VS MEDICAL TREATMENTS FOR TYPE 2 DIABETES MELLITUS A RANDOMIZED CLINICAL TRIAL
10.1038/oby.2004.7	198	GOODE L;BROLIN R;CHOWDHURY H;SHAPSES S	BONE AND GASTRIC BYPASS SURGERY: EFFECTS OF DIETARY CALCIUM AND VITAMIN D
10.1016/j.jpedsurg.2005.10.017	197	LAWSON M;KIRK S;MITCHELL T;CHEN M;LOUX T;DANIELS S;HARMON C;CLEMENTS R;GARCIA V;INGE T	ONEYEAR OUTCOMES OF ROUXENY GASTRIC BYPASS FOR MORBIDLY OBESE ADOLESCENTS: A MULTICENTER STUDY FROM THE PEDIATRIC BARIATRIC STUDY GROUP
10.3945/ajcn.2009.27583	190	AASHEIM E;BJORKMAN S;SOVIK T;ENGSTROM M;HANVOLD S;MALA T;OLBERS T;BOHMER T	VITAMIN STATUS AFTER BARIATRIC SURGERY: A RANDOMIZED STUDY OF GASTRIC BYPASS AND DUODENAL SWITCH
10.1093/ajcn/85.2.346	189	ANDRE L;BASSO-VANELLI R;RICCI ;PAULA A P;DI T L;DE O;CLAUDIO R C;HADDAD G;HADDAD J;PARIZOTTO N;DE V R;ARENA R;BORGHI-SILVA A	WHOLEBODY ELECTRICAL STIMULATION AS A STRATEGY TO IMPROVE FUNCTIONAL CAPACITY AND PRESERVER LEAN MASS AFTER BARIATRIC SURGERY: A RANDOMIZED TRIPLEBLIND CONTROLLED TRIAL
10.1001/jamasurg.2014.3579	185	RISSTAD H;SOVIK T;ENGSTROM M;AASHEIM ;ERLEND T E;FAGERLAND M;OLSEN M;KRISTINSSON J;LE R C;BOHMER T;BIRKELAND K;MALA T;OLBERS T	FIVEYEAR OUTCOMES AFTER LAPAROSCOPIC GASTRIC BYPASS AND LAPAROSCOPIC DUODENAL SWITCH IN PATIENTS WITH BODY MASS INDEX OF 50 TO 60 A RANDOMIZED CLINICAL TRIAL
10.2337/dc12-0779	183	DIXON J;CHUANG L;CHONG K;CHEN S;LAMBERT G;STRAZNICKY N;LAMBERT E;LEE W	PREDICTING THE GLYCEMIC RESPONSE TO GASTRIC BYPASS SURGERY IN PATIENTS WITH TYPE 2 DIABETES
10.1016/j.soard.2011.01.044	181	WOELNERHANSSEN B;PETERLI R;STEINERT R;PETERS T;BORBÉLY Y;BEGLINGER C	EFFECTS OF POSTBARIATRIC SURGERY WEIGHT LOSS ON ADIPOKINES AND METABOLIC PARAMETERS: COMPARISON OF LAPAROSCOPIC ROUXENY GASTRIC BYPASS AND LAPAROSCOPIC SLEEVE GASTRECTOMYA PROSPECTIVE RANDOMIZED TRIAL
10.1016/j.pcad.2013.09.005	176	VALEZI A;JUNIOR J;DE M M;DE B E;DE S S	WEIGHT LOSS OUTCOME AFTER SILASTIC RING ROUXENY GASTRIC BYPASS: 8 YEARS OF FOLLOWUP
10.1007/s11605-009-0891-x	172	WOODARD G;ENCARNACION B;DOWNEY J;PERAZA J;CHONG K;HERNANDEZ-BOUSSARD T;MORTON J	PROBIOTICS IMPROVE OUTCOMES AFTER ROUXENY GASTRIC BYPASS SURGERY: A PROSPECTIVE RANDOMIZED TRIAL
10.1002/oby.20522	170	STEINERT R;PETERLI R;KELLER S;MEYER-GERSPACH A;DREWE J;PETERS T;BEGLINGER C	BILE ACIDS AND GUT PEPTIDE SECRETION AFTER BARIATRIC SURGERY: A 1YEAR PROSPECTIVE RANDOMIZED PILOT TRIAL
10.1016/j.diabres.2013.04.005	170	LIANG Z;WU Q;CHEN B;YU P;ZHAO ;HONGLIANG H;OUYANG X	EFFECT OF LAPAROSCOPIC ROUXENY GASTRIC BYPASS SURGERY ON TYPE 2 DIABETES MELLITUS WITH HYPERTENSION: A RANDOMIZED CONTROLLED TRIAL
10.1016/j.jclinane.2005.05.009	168	FELD J;HOFFMAN W;STECHERT M;HOFFMAN I;ANANDA R	FENTANYL OR DEXMEDETOMIDINE COMBINED WITH DESFLURANE FOR BARIATRIC SURGERY
10.1161/JAHA.114.001265	167	ARORA P;REINGOLD J;BAGGISH A;GUANAGA D;P. P;WU C;GHORBANI A;SONG Y;CHEN-TOURNAUX A;KHAN A;TAINSH L;BUYS E;WILLIAMS J;HEUBLEIN D;BURNETT J;SEMIGRAN M;BLOCH K;SCHERRER-CROSBIE M;NEWTON-CHEH C;KAPLAN L;M. M;WANG T	WEIGHT LOSS SALINE LOADING AND THE NATRIURETIC PEPTIDE SYSTEM
10.1093/bja/aex192	167	NESTLER C;SIMON P;PETROFF D;HAMMERMUELLER S;KAMRATH D;WOLF S;DIETRICH A;CAMILO L;BEDA A;CARVALHO A;GIANNELLA-NETO A;RESKE A;WRIGGE ;H. H	INDIVIDUALIZED POSITIVE ENDEXPIRATORY PRESSURE IN OBESE PATIENTS DURING GENERAL ANAESTHESIA: A RANDOMIZED CONTROLLED CLINICAL TRIAL USING ELECTRICAL IMPEDANCE TOMOGRAPHY
10.1016/S2213-8587(19)30344-4	167	HOFSO D;FATIMA F;BORGERAAS H;BIRKELAND K;INGE I;GULSETH H;HERTEL J;JOHNSON ;LINE K L;LINDBERG M;NORDSTRAND N;SMASTUEN ;MILADA C M;STEFANOVSKI D;SVANEVIK M;VALDERHAUG T;SANDBU R;HJELMESAETH J	GASTRIC BYPASS VERSUS SLEEVE GASTRECTOMY IN PATIENTS WITH TYPE 2 DIABETES (OSEBERG): A SINGLECENTRE TRIPLEBLIND RANDOMISED CONTROLLED TRIAL
10.1016/S2213-8587(15)00089-3	166	IKRAMUDDIN S;BILLINGTON C;LEE W;BANTLE J;THOMAS A;CONNETT J;LESLIE ;DANIEL B D;INABNET W;JEFFERY R;CHONG ;KEONG K;CHUANG L;SARR M;JENSEN M;VELLA A;AHMED L;BELANI K;SCHONE J;L. L;OLOFSON A;BAINBRIDGE H;LAQUA P;WANG Q;KORNER J	ROUXENY GASTRIC BYPASS FOR DIABETES (THE DIABETES SURGERY STUDY): 2YEAR OUTCOMES OF A 5YEAR RANDOMISED CONTROLLED TRIAL
10.1006/jsre.2001.6322	163	WUDEL L;WRIGHT J;DEBELAK J;ALLOS T;SHYR Y;CHAPMAN W	PREVENTION OF GALLSTONE FORMATION IN MORBIDLY OBESE PATIENTS UNDERGOING RAPID WEIGHT LOSS: RESULTS OF A RANDOMIZED CONTROLLED PILOT STUDY
10.1016/J.PHYSBEH.2011.07.025	162	BUETER M;MIRAS A;CHICHGER H;FENSKE W;GHATEI M;BLOOM S;UNWIN R;LUTZ T;SPECTOR A;LE R C	ALTERATIONS OF SUCROSE PREFERENCE AFTER ROUXENY GASTRIC BYPASS
10.1530/EJE-10-0514	160	HOFSO D;NORDSTRAND N;JOHNSON L;KARLSEN T;HAGER H;JENSSEN T;BOLLERSLEV J;GODANG K;SANDBU ;R. R;ROISLIEN J;HJELMESAETH J	OBESITYRELATED CARDIOVASCULAR RISK FACTORS AFTER WEIGHT LOSS: A CLINICAL TRIAL COMPARING GASTRIC BYPASS SURGERY AND INTENSIVE LIFESTYLE INTERVENTION
10.1016/j.soard.2011.07.009	156	LEE W;CHEN C;CHONG K;LEE Y;CHEN S;LEE S	CHANGES IN POSTPRANDIAL GUT HORMONES AFTER METABOLIC SURGERY: A COMPARISON OF GASTRIC BYPASS AND SLEEVE GASTRECTOMY
10.1007/s11605-012-1855-0	156	RAMÓN J;SALVANS S;CROUS X;PUIG S;GODAY A;BENAIGES D;TRILLO L;PERA M;GRANDE L	EFFECT OF ROUXENY GASTRIC BYPASS VS SLEEVE GASTRECTOMY ON GLUCOSE AND GUT HORMONES: A PROSPECTIVE RANDOMISED TRIAL
10.1007/S11605-009-1060-Y	153	CAMPOS G;RABL C;PEEVA S;CIOVICA R;RAO M;SCHWARZ J;HAVEL P;SCHAMBELAN M;MULLIGAN K	IMPROVEMENT IN PERIPHERAL GLUCOSE UPTAKE AFTER GASTRIC BYPASS SURGERY IS OBSERVED ONLY AFTER SUBSTANTIAL WEIGHT LOSS HAS OCCURRED AND CORRELATES WITH THE MAGNITUDE OF WEIGHT LOST
10.1002/oby.20397	151	SVENSSON P;ANVEDEN ;ROMEO S;PELTONEN M;AHLIN S;BURZA M;CARLSSON B;JACOBSON P;LINDROOS A;LÖNROTH H;MAGLIO C;NÄSLUND I;SJÖHOLM K;WEDEL H;SÖDERPALM B;SJÖSTRÖM L;CARLSSON L	ALCOHOL CONSUMPTION AND ALCOHOL PROBLEMS AFTER BARIATRIC SURGERY IN THE SWEDISH OBESE SUBJECTS STUDY
10.1007/s11695-014-1258-2	150	ZHANG Y;ZHAO H;CAO Z;SUN X;ZHANG C;CAI W;LIU R;HU S;QIN ;MINGFANG M	A RANDOMIZED CLINICAL TRIAL OF LAPAROSCOPIC ROUXENY GASTRIC BYPASS AND SLEEVE GASTRECTOMY FOR THE TREATMENT OF MORBID OBESITY IN CHINA: A 5YEAR OUTCOME
10.1097/SLA.0b013e318156f012	149	KARAMANAKOS S;VAGENAS K;KALFARENTZOS F;ALEXANDRIDES T	WEIGHT LOSS APPETITE SUPPRESSION AND CHANGES IN FASTING AND POSTPRANDIAL GHRELIN AND PEPTIDEYY LEVELS AFTER ROUXENY GASTRIC BYPASS AND SLEEVE GASTRECTOMY A PROSPECTIVE DOUBLE BLIND STUDY
10.1007/s11695-022-06051-7	149	NANNIPIERI M;MARI A;ANSELMINO M;BALDI S;BARSOTTI E;GUARINO D;CAMASTRA S;BELLINI R;BERTA ;R. D R;FERRANNINI E	THE ROLE OF ΒCELL FUNCTION AND INSULIN SENSITIVITY IN THE REMISSION OF TYPE 2 DIABETES AFTER GASTRIC BYPASS SURGERY
10.2337/db15-0809	147	COEN P;MENSHIKOVA E;DISTEFANO G;ZHENG D;TANNER C;STANDLEY R;HELBLING N;DUBIS G;RITOV V;XIE H;DESIMONE M;SMITH S;STEFANOVIC-RACIC M;TOLEDO F;HOUMARD J;GOODPASTER B	EXERCISE AND WEIGHT LOSS IMPROVE MUSCLE MITOCHONDRIAL RESPIRATION LIPID PARTITIONING AND INSULIN SENSITIVITY AFTER GASTRIC BYPASS SURGERY
10.1001/archsurg.139.10.1088	145	LEE W;HUANG M;WANG W;LIN C;CHEN T;LAI I	EFFECTS OF OBESITY SURGERY ON THE METABOLIC SYNDROME
10.3945/ajcn.112.036921	145	MIRAS A;JACKSON R;JACKSON S;GOLDSTONE A;OLBERS T;HACKENBERG T;SPECTOR A;LE R C	GASTRIC BYPASS SURGERY FOR OBESITY DECREASES THE REWARD VALUE OF A SWEETFAT STIMULUS AS ASSESSED IN A PROGRESSIVE RATIO TASK
10.1038/ijo.2016.121	145	SVANE M;JØRGENSEN N;BOJSEN-MØLLER K;DIRKSEN C;NIELSEN S;KRISTIANSEN V;TORÄNG S;WEWER A N;REHFELD J;HARTMANN B;MADSBAD S;HOLST J	PEPTIDE YY AND GLUCAGONLIKE PEPTIDE1 CONTRIBUTE TO DECREASED FOOD INTAKE AFTER ROUXENY GASTRIC BYPASS SURGERY
10.1001/jamasurg.2020.5666	145	GRONROOS S;HELMIO M;JUUTI A;TIUSANEN R;HURME S;LOYTTYNIEMI E;OVASKA J;LEIVONEN ;MARJA M;PEROMAA-HAAVISTO P;MAKLIN S;SINTONEN H;SAMMALKORPI H;NUUTILA P;SALMINEN P	EFFECT OF LAPAROSCOPIC SLEEVE GASTRECTOMY VS ROUXENY GASTRIC BYPASS ON WEIGHT LOSS AND QUALITY OF LIFE AT 7 YEARS IN PATIENTS WITH MORBID OBESITY THE SLEEVEPASS RANDOMIZED CLINICAL TRIAL
10.1002/bjs.6802	144	SOVIK T;TAHA O;AASHEIM E;ENGSTROM M;KRISTINSSON J;BJOKMAN S;SCHOU C;LONROTH H;MALA T;OLBERS T	RANDOMIZED CLINICAL TRIAL OF LAPAROSCOPIC GASTRIC BYPASS VERSUS LAPAROSCOPIC DUODENAL SWITCH FOR SUPEROBESITY
10.1016/S0140-6736(23)00634-7	144	VERRASTRO O;PANUNZI S;CASTAGNETO-GISSEY L;DE G A;LEMBO E;CAPRISTO E;GUIDONE C;ANGELINI G;PENNESTRÌ F;SESSA L;VECCHIO F;RICCARDI L;ZOCCO M;BOSKOSKI I;CASELLA-MARIOLO J;MARINI P;POMPILI M;CASELLA G;FIORI E;RUBINO F;BORNSTEIN S;RAFFAELLI M;MINGRONE G	BARIATRIC–METABOLIC SURGERY VERSUS LIFESTYLE INTERVENTION PLUS BEST MEDICAL CARE IN NONALCOHOLIC STEATOHEPATITIS (BRAVES): A MULTICENTRE OPENLABEL RANDOMISED TRIAL
10.1016/j.metabol.2004.01.015	141	VON M M;STOECKLI R;BILZ S;KRAENZLIN M;LANGER I;KELLER U	CHANGES IN BONE MINERAL CONTENT AFTER SURGICAL TREATMENT OF MORBID OBESITY
10.1002/jbmr.2467	141	SCHAFER A;WEAVER C;BLACK D;WHEELER A;CHANG H;SZEFC G;STEWART L;ROGERS S;CARTER J;POSSELT A;SHOBACK D;SELLMEYER D	INTESTINAL CALCIUM ABSORPTION DECREASES DRAMATICALLY AFTER GASTRIC BYPASS SURGERY DESPITE OPTIMIZATION OF VITAMIN D STATUS
10.1016/j.soard.2007.11.010	138	BORKGREN-OKONEK M;HART R;PANTANO J;RANTIS J P;GUSKE P;KANE J J;GORDON N;SAMBOL N	ENOXAPARIN THROMBOPROPHYLAXIS IN GASTRIC BYPASS PATIENTS: EXTENDED DURATION DOSE STRATIFICATION AND ANTIFACTOR XA ACTIVITY
10.1053/j.gastro.2013.04.002	137	THOMPSON C;CHAND B;CHEN Y;DEMARCO ;DANIEL C D;MILLER L;SCHWEITZER M;ROTHSTEIN ;RICHARD I R;LAUTZ D;SLATTERY J;RYAN M;BRETHAUER S;SCHAUER P;MITCHELL M;STARPOLI A;HABER G;CATALANO M;EDMUNDOWICZ S;FAGNANT A;KAPLAN L;ROSLIN M	ENDOSCOPIC SUTURING FOR TRANSORAL OUTLET REDUCTION INCREASES WEIGHT LOSS AFTER ROUXENY GASTRIC BYPASS SURGERY
10.2337/dc15-0750	137	SALEM V;DEMETRIOU L;BEHARY P;ALEXIADOU K;SCHOLTZ S;THARAKAN G;MIRAS A;PURKAYASTHA S;AHMED A;BLOOM S;WALL M;DHILLO W;TAN T	WEIGHT LOSS BY LOWCALORIE DIET VERSUS GASTRIC BYPASS SURGERY IN PEOPLE WITH DIABETES RESULTS IN DIVERGENT BRAIN ACTIVATION PATTERNS: A FUNCTIONAL MRI STUDY
10.1016/j.soard.2005.08.008	136	SANCHEZ B;MOHR C;MORTON J;SAFADI B;ALAMI R;CURET M	COMPARISON OF TOTALLY ROBOTIC LAPAROSCOPIC ROUXENY GASTRIC BYPASS AND TRADITIONAL LAPAROSCOPIC ROUXENY GASTRIC BYPASS
10.1158/1940-6207.CAPR-21-0229	136	STEVEN S;HOLLINGSWORTH K;SMALL P;WOODCOCK S;PUCCI A;ARIBISALA B;AL-MRABEH A;DALY A;BATTERHAM R;TAYLOR R	WEIGHT LOSS DECREASES EXCESS PANCREATIC TRIACYLGLYCEROL SPECIFICALLY IN TYPE 2 DIABETES
10.7326/M17-2383	136	O’BRIEN R;JOHNSON E;HANEUSE S;COLEMAN K;O’CONNOR P;FISHER D;SIDNEY S;BOGART A;THEIS M;ANAU J;SCHROEDER E;ARTERBURN D	MICROVASCULAR OUTCOMES IN PATIENTS WITH DIABETES AFTER BARIATRIC SURGERY VERSUS USUAL CARE
10.1111/j.1365-2605.2009.01017.x	130	REIS L;FAVARO W;BARREIRO G;DE O L;CHAIM E;FREGONESI A;FERREIRA U	ERECTILE DYSFUNCTION AND HORMONAL IMBALANCE IN MORBIDLY OBESE MALE IS REVERSED AFTER GASTRIC BYPASS SURGERY: A PROSPECTIVE RANDOMIZED CONTROLLED TRIAL
10.1007/s11695-014-1245-7	130	NERGAARD B;LEIFSSON B;HEDENBRO J;GISLASON H	GASTRIC BYPASS WITH LONG ALIMENTARY LIMB OR LONG PANCREATOBILIARY LIMB—LONGTERM RESULTS ON WEIGHT LOSS RESOLUTION OF COMORBIDITIES AND METABOLIC PARAMETERS
10.1038/oby.2011.172	128	SHAH M;SNELL P;RAO S;ADAMS-HUET B;QUITTNER C;LIVINGSTON E;GARG A	HIGHVOLUME EXERCISE PROGRAM IN OBESE BARIATRIC SURGERY PATIENTS: A RANDOMIZED CONTROLLED TRIAL
10.1007/s00464-012-2225-4	125	HELMIÖ M;VICTORZON M;OVASKA J;LEIVONEN M;JUUTI A;JASER N;PEROMAA P;TOLONEN P;HURME S;SALMINEN P	SLEEVEPASS: A RANDOMIZED PROSPECTIVE MULTICENTER STUDY COMPARING LAPAROSCOPIC SLEEVE GASTRECTOMY AND GASTRIC BYPASS IN THE TREATMENT OF MORBID OBESITY: PRELIMINARY RESULTS
10.1038/oby.2001.20	124	SJÖSTRÖM C;PELTONEN M;SJÖSTRÖM L	BLOOD PRESSURE AND PULSE PRESSURE DURING LONGTERM WEIGHT LOSS IN THE OBESE:: THE SWEDISH OBESE SUBJECTS (SOS) INTERVENTION STUDY
10.1016/j.soard.2011.03.002	124	BENAIGES D;GODAY A;RAMON J;HERNANDEZ E;PERA M;CANO J	LAPAROSCOPIC SLEEVE GASTRECTOMY AND LAPAROSCOPIC GASTRIC BYPASS ARE EQUALLY EFFECTIVE FOR REDUCTION OF CARDIOVASCULAR RISK IN SEVERELY OBESE PATIENTS AT ONE YEAR OF FOLLOWUP
10.1007/s11695-008-9588-6	123	CSENDES A;BURGOS A;ALTUVE J;BONACIC S	INCIDENCE OF MARGINAL ULCER 1 MONTH AND 1 TO 2 YEARS AFTER GASTRIC BYPASS: A PROSPECTIVE CONSECUTIVE ENDOSCOPIC EVALUATION OF 442 PATIENTS WITH MORBID OBESITY
10.1016/j.cgh.2016.10.023	123	LOPES G D;MOEHLECKE M;LOPES D S F;BASSAN B;DUTRA E;SCHAAN B;BAIOCCHI B;DE C K	WHEY PROTEIN SUPPLEMENTATION ENHANCES BODY FAT AND WEIGHT LOSS IN WOMEN LONG AFTER BARIATRIC SURGERY: A RANDOMIZED CONTROLLED TRIAL
10.1016/S2213-8587(19)30157-3	122	MIRAS A;PEREZ-PEVIDA B;ALDHWAYAN M;KAMOCKA A;MCGLONE E;AL-NAJIM W;CHAHAL ;HARVINDER H;BATTERHAM R;MCGOWAN B;KHAN O;GREENER V;AHMED A;PETRIE A;SCHOLTZ ;SAMANTHA S;BLOOM S;TAN T	ADJUNCTIVE LIRAGLUTIDE TREATMENT IN PATIENTS WITH PERSISTENT OR RECURRENT TYPE 2 DIABETES AFTER METABOLIC SURGERY (GRAVITAS): A RANDOMISED DOUBLEBLIND PLACEBOCONTROLLED TRIAL
10.1001/jamasurg.2016.0395	121	MITCHELL J;CHRISTIAN N;FLUM D;POMP A;PORIES W;WOLFE B;COURCOULAS A;BELLE S	POSTOPERATIVE BEHAVIORAL VARIABLES AND WEIGHT CHANGE 3 YEARS AFTER BARIATRIC SURGERY
10.1213/01.ANE.0000136472.01079.95	120	STRUM E;SZENOHRADSZKI J;KAUFMAN W;ANTHONE G;MANZ I;LUMB P	EMERGENCE AND RECOVERY CHARACTERISTICS OF DESFLURANE VERSUS SEVOFLURANE IN MORBIDLY OBESE ADULT SURGICAL PATIENTS: A PROSPECTIVE RANDOMIZED STUDY
10.1381/09608920160558588	117	KALFARENTZOS F;STAVROPOULOU F;YARMENITIS S;KEHAGIAS I;KARAMESINI M;DIMITRAKOPOULOS A;MANIATI A	PROPHYLAXIS OF VENOUS THROMBOEMBOLISM USING TWO DIFFERENT DOSES OF LOWMOLECULARWEIGHT HEPARIN (NADROPARIN) IN BARIATRIC SURGERY: A PROSPECTIVE RANDOMIZED TRIAL
10.1016/S2213-8587(14)70066-X	117	WENTWORTH J;PLAYFAIR J;LAURIE C;RITCHIE ;MATTHEW E M;BROWN W;BURTON P;SHAW J;O'BRIEN P	MULTIDISCIPLINARY DIABETES CARE WITH AND WITHOUT BARIATRIC SURGERY IN OVERWEIGHT PEOPLE: A RANDOMISED CONTROLLED TRIAL
10.1172/JCI78016	117	COEN P;TANNER C;HELBLING N;DUBIS ;GABRIEL S G;HAMES K;XIE H;EID G;STEFANOVIC-RACIC M;TOLEDO F;JAKICIC J;HOUMARD J;GOODPASTER B	CLINICAL TRIAL DEMONSTRATES EXERCISE FOLLOWING BARIATRIC SURGERY IMPROVES INSULIN SENSITIVITY
10.1016/j.soard.2015.03.011	117	TOLONE S;CRISTIANO S;SAVARINO E;LUCIDO F;FICO D;DOCIMO L	EFFECTS OF OMEGALOOP BYPASS ON ESOPHAGOGASTRIC JUNCTION FUNCTION
10.2337/dc17-0487	115	SIMONSON D;HALPERIN F;FOSTER K;VERNON A;GOLDFINE A	CLINICAL AND PATIENTCENTERED OUTCOMES IN OBESE PATIENTS WITH TYPE 2 DIABETES 3 YEARS AFTER RANDOMIZATION TO ROUXENY GASTRIC BYPASS SURGERY VERSUS INTENSIVE LIFESTYLE MANAGEMENT: THE SLIMMT2D STUDY
10.1007/s11695-015-1713-8	114	CHOBAN P;FLANCBAUM L	THE EFFECT OF ROUX LIMB LENGTHS ON OUTCOME AFTER ROUXENY GASTRIC BYPASS: A PROSPECTIVE RANDOMIZED CLINICAL TRIAL
10.1007/s00125-013-2965-2	114	KEIDAR A;HERSHKOP K;MARKO L;SCHWEIGER C;HECHT L;BARTOV N;KEDAR A;WEISS R	ROUXENY GASTRIC BYPASS VS SLEEVE GASTRECTOMY FOR OBESE PATIENTS WITH TYPE 2 DIABETES: A RANDOMISED TRIAL
10.1210/clinem/dgaa006	114	COURCOULAS A;GALLAGHER J;NEIBERG R;EAGLETON E;DELANY J;LANG W;PUNCHAI ;SURIYA S;GOURASH W;JAKICIC J	BARIATRIC SURGERY VS LIFESTYLE INTERVENTION FOR DIABETES TREATMENT: 5YEAR OUTCOMES FROM A RANDOMIZED TRIAL
10.1016/S1072-7515(02)01321-2	113	NGUYEN N;PEREZ R;FLEMING N;RIVERS R;WOLFE B	EFFECT OF PROLONGED PNEUMOPERITONEUM ON INTRAOPERATIVE URINE OUTPUT DURING LAPAROSCOPIC GASTRIC BYPASS
10.1007/S00464-018-6307-9	113	RUIZ-TOVAR J;CARBAJO M;JIMENEZ J;CASTRO M;GONZALEZ G;ORTIZ-DE-SOLORZANO J;ZUBIAGA L	LONGTERM FOLLOWUP AFTER SLEEVE GASTRECTOMY VERSUS ROUXENY GASTRIC BYPASS VERSUS ONEANASTOMOSIS GASTRIC BYPASS: A PROSPECTIVE RANDOMIZED COMPARATIVE STUDY OF WEIGHT LOSS AND REMISSION OF COMORBIDITIES
10.1016/S1072-7515(02)01132-8	112	FREITAS W;FRANCO O L;PEREZ ;EDUARDO A E;ILIAS E;LOTTENBERG C;SILVA ;ANDERSON S A;URBANO J;OLIVEIRA M;VIEIRA R;RIBEIRO-ALVES M;ALVES V;KASSAB P;THULER F;MALHEIROS C	SYSTEMIC INFLAMMATION IN SEVERE OBESE PATIENTS UNDERGOING SURGERY FOR OBESITY AND WEIGHTRELATED DISEASES
10.1001/jamaneurol.2021.0659	112	MOLLAN S;MITCHELL J;OTTRIDGE R;AGUIAR M;YIANGOU A;ALIMAJSTOROVIC Z;CARTWRIGHT D;GRECH O;LAVERY G;WESTGATE C;VIJAY V;SCOTTON W;WAKERLEY B;MATTHEWS T;ANSONS A;HICKMAN S;BENZIMRA J;RICK C;SINGHAL R;TAHRANI A;BROCK K;FREW E;SINCLAIR A	EFFECTIVENESS OF BARIATRIC SURGERY VS COMMUNITY WEIGHT MANAGEMENT INTERVENTION FOR THE TREATMENT OF IDIOPATHIC INTRACRANIAL HYPERTENSION: A RANDOMIZED CLINICAL TRIAL
10.4103/jmas.JMAS_117_21	110	NGUYEN N;GOLDMAN C;HO H;GOSSELIN R;SINGH A;WOLFE B	SYSTEMIC STRESS RESPONSE AFTER LAPAROSCOPIC AND OPEN GASTRIC BYPASS
10.1016/j.soard.2009.01.009	109	ELAINE W;BOUXSEIN M;PUTMAN M;MONIS E;ROY A;PRATT J;BUTSCH W;FINKELSTEIN J	TWOYEAR CHANGES IN BONE DENSITY AFTER ROUXENY GASTRIC BYPASS SURGERY
10.1016/j.soard.2016.08.025	109	KALINOWSKI P;PALUSZKIEWICZ R;WROBLEWSKI T;REMISZEWSKI P;GRODZICKI M;BARTOSZEWICZ Z;KRAWCZYK M	GHRELIN LEPTIN AND GLYCEMIC CONTROL AFTER SLEEVE GASTRECTOMY VERSUS ROUXENY GASTRIC BYPASSRESULTS OF A RANDOMIZED CLINICAL TRIAL
10.1007/s40618-022-01811-9	108	KOLOTKIN R;CROSBY R;GRESS R;HUNT S;ADAMS T	TWOYEAR CHANGES IN HEALTHRELATED QUALITY OF LIFE IN GASTRIC BYPASS PATIENTS COMPARED WITH SEVERELY OBESE CONTROLS
10.1007/s11695-010-0279-8	108	LEYBA J;AULESTIA S;LLOPIS S	LAPAROSCOPIC ROUXENY GASTRIC BYPASS VERSUS LAPAROSCOPIC SLEEVE GASTRECTOMY FOR THE TREATMENT OF MORBID OBESITY A PROSPECTIVE STUDY OF 117 PATIENTS
10.1007/s00125-013-3003-0	108	JACOBSEN S;BOJSEN-MØLLER K;DIRKSEN C;JØRGENSEN N;CLAUSEN T;WULFF B;KRISTIANSEN V;WORM D;HANSEN D;HOLST J;VAN H G;MADSBAD S	EFFECTS OF GASTRIC BYPASS SURGERY ON GLUCOSE ABSORPTION AND METABOLISM DURING A MIXED MEAL IN GLUCOSETOLERANT INDIVIDUALS
10.1016/j.soard.2015.01.011	108	COURCOULAS A;CHRISTIAN N;O'ROURKE R;DAKIN G;PATCHEN D E;FLUM D;MELISSA K P;MITCHELL J;PATTERSON E;POMP A;PORIES W;SPANIOLAS K;STEFFEN K;WOLFE B;BELLE S	PREOPERATIVE FACTORS AND 3YEAR WEIGHT CHANGE IN THE LONGITUDINAL ASSESSMENT OF BARIATRIC SURGERY (LABS) CONSORTIUM
10.3945/AJCN.111.013771	108	DANG J;DEPRATO A;VERHOEFF K;SUN W;PANDEY A;MOCANU V;KARMALI S;SWITZER ;NOAH J N;NGUYEN N	VARIATION OF LAPAROSCOPIC ROUXENY GASTRIC BYPASS TECHNIQUES: A SURVEY OF 518 BARIATRIC SURGEONS
10.1007/S11695-011-0412-3	107	UMEDA L;SILVA E;CARNEIRO G;ARASAKI C;GELONEZE B;ZANELLA M	EARLY IMPROVEMENT IN GLYCEMIC CONTROL AFTER BARIATRIC SURGERY AND ITS RELATIONSHIPS WITH INSULIN GLP1 AND GLUCAGON SECRETION IN TYPE 2 DIABETIC PATIENTS
10.1002/bjs.5512	105	STRZELCZYK J;SZYMANSKI D;NOWICKI M;WILCZYNSKI ;W. W;GASZYNSKI T;CZUPRYNIAK L	RANDOMIZED CLINICAL TRIAL OF POSTOPERATIVE HERNIA PROPHYLAXIS IN OPEN BARIATRIC SURGERY
10.1210/jc.2011-0165	105	REED M;PORIES W;CHAPMAN W;PENDER J;BOWDEN R;BARAKAT H;GAVIN T;GREEN T;TAPSCOTT E;ZHENG D;SHANKLEY N;YIEH L;POLIDORI D;PICCOLI S;BRENNER-GATI L;DOHM G	ROUXENY GASTRIC BYPASS CORRECTS HYPERINSULINEMIA IMPLICATIONS FOR THE REMISSION OF TYPE 2 DIABETES
10.2337/dc11-1383	105	DUNN J;ABUMRAD N;BREITMAN I;MARKS-SHULMAN P;FLYNN C;JABBOUR K;FEURER I;TAMBOLI R	HEPATIC AND PERIPHERAL INSULIN SENSITIVITY AND DIABETES REMISSION AT 1 MONTH AFTER ROUXENY GASTRIC BYPASS SURGERY IN PATIENTS RANDOMIZED TO OMENTECTOMY
10.2337/DB13-0185	105	MAGKOS F;BRADLEY D;SCHWEITZER G;FINCK B;EAGON J;ILKAYEVA O;NEWGARD C;KLEIN S	EFFECT OF ROUXENY GASTRIC BYPASS AND LAPAROSCOPIC ADJUSTABLE GASTRIC BANDING ON BRANCHEDCHAIN AMINO ACID METABOLISM
10.1210/jc.2015-2467	105	ALBAUGH V;FLYNN C;CAI S;XIAO Y;TAMBOLI R;ABUMRAD N	EARLY INCREASES IN BILE ACIDS POST ROUXENY GASTRIC BYPASS ARE DRIVEN BY INSULINSENSITIZING SECONDARY BILE ACIDS
10.1002/bjs.10400	105	IGNAT M;VIX M;IMAD I;D'URSO A;PERRETTA S;MARESCAUX J;MUTTER D	RANDOMIZED TRIAL OF ROUXENY GASTRIC BYPASS VERSUS SLEEVE GASTRECTOMY IN ACHIEVING EXCESS WEIGHT LOSS
10.1001/jamasurg.2020.0420	105	COHEN R;PEREIRA T;ABOUD C;MAMEDIO M;ZANATA P T;LOPES C J;SCHIAVON C;POMPILIO C;QUIRINO Q;PECHY F;CALMON D C S A;GOMES D M F;CUNHA D S L;DE P C P;HALPERN H;JACY M;FREDERICO D L F;MARTINS B;KUGA R;SARIAN P T;DOCHERTY N;LE R C	EFFECT OF GASTRIC BYPASS VS BEST MEDICAL TREATMENT ON EARLYSTAGE CHRONIC KIDNEY DISEASE IN PATIENTS WITH TYPE 2 DIABETES AND OBESITY A RANDOMIZED CLINICAL TRIAL
10.1381/0960892052993468	104	INABNET W;QUINN T;GAGNER M;URBAN M;POMP A	LAPAROSCOPIC ROUXENY GASTRIC BYPASS IN PATIENTS WITH BMI <50: A PROSPECTIVE RANDOMIZED TRIAL COMPARING SHORT AND LONG LIMB LENGTHS
10.1007/s11695-009-9850-6	104	TONDAPU P;PROVOST D;ADAMS-HUET B;SIMS T;CHANG C;SAKHAEE K	COMPARISON OF THE ABSORPTION OF CALCIUM CARBONATE AND CALCIUM CITRATE AFTER ROUXENY GASTRIC BYPASS
10.1210/jc.2015-2665	102	GOLDSTONE A;MIRAS A;SCHOLTZ S;JACKSON S;NEFF K;PÉNICAUD L;GEOGHEGAN J;CHHINA N;DURIGHEL G;BELL J;MEILLON S;LE R C	LINK BETWEEN INCREASED SATIETY GUT HORMONES AND REDUCED FOOD REWARD AFTER GASTRIC BYPASS SURGERY FOR OBESITY
10.1007/s11695-016-2337-3	102	BRADLEY L;FORMAN E;KERRIGAN S;GOLDSTEIN S;BUTRYN M;THOMAS J;HERBERT J;SARWER D	PROJECT HELP: A REMOTELY DELIVERED BEHAVIORAL INTERVENTION FOR WEIGHT REGAIN AFTER BARIATRIC SURGERY
10.1016/j.surg.2005.07.024	101	PRYSTOWSKY J;MORASCH M;ESKANDARI M;HUNGNESS E;NAGLE A	PROSPECTIVE ANALYSIS OF THE INCIDENCE OF DEEP VENOUS THROMBOSIS IN BARIATRIC SURGERY PATIENTS

## Sheet: README
Supplementary Material 5 – Citation Classics
This supplementary material includes the citation classics identified in the present study, comprising highly cited publications within the analyzed literature. The material provides a classification of articles with more than 100 and more than 400 citations, highlighting the most influential studies in the field.
