# Supplementary material for: Global Trends in Scientific Output of Clinical Trials on Gastric Bypass: A Machine Learning–Based Bibliometric Study
Source: Research Square preprint supplement (doi:10.21203/rs.3.rs-8854344/v1), 2026-02-18
Supplement: Supplementary file 2 [file 570d9db074940ba6b3a7d6b8.docx]

| **Country**  **Supplementary Material 3 – normalization**  Supplementary Material 3. This material presents the data used to normalize the number of scientific articles by population, per million individuals with obesity, and by surgical volume for the countries analyzed. The table includes information on the total number of identified publications, population data, and, when available, the number of bariatric surgeries reported by IFSO. These values enabled the calculation of the adjusted scientific contribution index, used for proportional comparison among countries. When data were unavailable, the values were classified as “N/A.” | **Number articles** | **Number population** | **BC** | **Prevalence obesity %** |
| --- | --- | --- | --- | --- |
| USA | 740 | 2.3 | 3.53 | 5.1 |
| BRAZIL | 359 | 1.8 | 5.09 | 5.8 |
| SWEDEN | 295 | 29.7 | 60.2 | 169.5 |
| NORWAY | 241 | 48.7 | 145.9 | 218.2 |
| SPAIN | 182 | 3.93 | N/D | 19.7 |
| NETHERLANDS | 151 | 8.91 | 11.2 | 49.0 |
| UNITED KINGDOM | 149 | 2.32 | 22.1 | 7.5 |
| GERMANY | 147 | 1.78 | N/D | 7.1 |
| FINLAND | 143 | 26.5 | N/D | 107.4 |
| DENMARK | 135 | 24.1 | N/D | 157.9 |
| SWITZERLAND | 104 | 12,97 | N/D | 85.0 |
| CHINA | 96 | 0,07 | 3.1 | 0.8 |
| FRANCE | 92 | 1,45 | 2.3 | 12.6 |
| ITALY | 89 | 1,50 | 5.6 | 6.9 |
| IRAN | 68 | 0,86 | 10 | 2.9 |
| AUSTRIA | 56 | 6,59 | 26.6 | 36.1 |
| EGYPT | 42 | 0,45 | N/D | 0.8 |
| BELGIUM | 34 | 3,09 | N/D | 13.1 |
| CANADA | 34 | 0,97 | N/D | 3.1 |
| IRELAND | 32 | 6,97 | N/D | 19.7 |
| PORTUGAL | 31 | 2,97 | N/D | 10.9 |
| SOUTH KOREA | 31 | N/D | 21.1 | 8.9 |
| AUSTRALIA | 27 | 1,18 | 1.3 | 3.1 |
| NEW ZEALAND | 27 | N/D | 12.8 | 15.1 |
| POLAND | 25 | 0,65 | N/D | 2.0 |
| GREECE | 23 | **2,12** | N/D | 6.7 |
| MEXICO | 22 | 0,19 | 3.1 | 0.4 |
| INDIA | 19 | 0,01 | N/D | 0.1 |
| ISRAEL | 18 | 2,21 | 2.7 | 8.1 |
| TURKEY | 17 | N/D | N/D | N/D |
| KAZAKHSTAN | 14 | 0,79 | N/D | 3.5 |
| CHILE | 12 | 0,68 | 0.68 | 1.5 |
| KUWAIT | 11 | 3,24 | 9.8 | 4.9 |
| THAILAND | 11 | 0,16 | N/D | 1.0 |
| SINGAPORE | 9 | 0,94 | N/D | 11.4 |
| SAUDI ARABIA | 8 | 0,31 | N/D | 0.5 |
| JAPAN | 7 | 0,06 | N/D | 1.1 |
| SLOVENIA | 5 | 2,45 | N/D | 10.7 |
| VENEZUELA | 3 | 0,11 | 2 | 0.4 |
| ARGENTINA | 2 | 0,05 | N/D | 0.1 |
| BAHRAIN | 2 | 1,65 | N/D | 3.3 |
| NIGERIA | 2 | 0,01 | N/D | 0.0 |
| OMAN | 2 | 0,06 | N/D | 1.2 |
| UNITED ARAB EMIRATES | 2 | 0,27 | N/D | 0.5 |
| JORDAN | 1 | 0,12 | N/D | 0.2 |
| LEBANON | 1 | 0,02 | N/D | 0.5 |
| LITHUANIA | 1 | 0,33 | N/D | 1.1 |
