# Supplementary material for: Global Trends in Scientific Output of Clinical Trials on Gastric Bypass: A Machine Learning–Based Bibliometric Study
Source: Research Square preprint supplement (doi:10.21203/rs.3.rs-8854344/v1), 2026-02-18
Supplement: Supplementary file 3 [file 9f3624f54d2f1a287aa0ed6d.xlsx]

## Sheet: README
Supplementary Material 2 – Study Metadata
This spreadsheet contains the bibliometric data analyzed in the present study, including year of publication, authors, originating institutions, journal, keywords, study location, number of citations, and other relevant metadata.

## Sheet: matrix
Merged keywords	keywords	Full Author Addresses	Abstract	Publication Address	affiliations	SN — ISSN (Serial Number)	Journal	Source Title	Language	orcid.numbers	Pages	Publisher	Subject Category	Times Cited	Authors	DOI	TITLE ARTICLE	Number of surgeries	year	Author Full Names	Reprint Author / Corresponding Author Address	Author Keywords	Author Institutions	Full Source Reference	url	database
ADULT; ALLOPATHY; ARTICLE; BARIATRIC SURGERY; CARDIOVASCULAR RISK; CAUSE OF DEATH; CLINICAL TRIAL; CONTROLLED CLINICAL TRIAL; CONTROLLED STUDY; FEMALE; FOLLOW UP; GASTRIC BANDING; GASTROPLASTY; HAZARD RATIO; HEART INFARCTION; HUMAN; MAJOR CLINICAL STUDY; MALE; MORTALITY; OBESITY; PRIORITY JOURNAL; RISK ASSESSMENT; SEX DIFFERENCE; STOMACH BYPASS; SWEDEN; WEIGHT CHANGE; WEIGHT REDUCTION	ADULT; ALLOPATHY; ARTICLE; BARIATRIC SURGERY; CARDIOVASCULAR RISK; CAUSE OF DEATH; CLINICAL TRIAL; CONTROLLED CLINICAL TRIAL; CONTROLLED STUDY; FEMALE; FOLLOW UP; GASTRIC BANDING; GASTROPLASTY; HAZARD RATIO; HEART INFARCTION; HUMAN; MAJOR CLINICAL STUDY; MALE; MORTALITY; OBESITY; PRIORITY JOURNAL; RISK ASSESSMENT; SEX DIFFERENCE; STOMACH BYPASS; SWEDEN; WEIGHT CHANGE; WEIGHT REDUCTION	INSTITUTE OF MEDICINE, SAHLGRENSKA ACADEMY, GOTHENBURG UNIVERSITY, GOTHENBURG, SWEDEN; INSTITUTE OF ANESTHESIOLOGY, SAHLGRENSKA ACADEMY, GOTHENBURG UNIVERSITY, GOTHENBURG, SWEDEN; INSTITUTE OF SURGERY, SAHLGRENSKA ACADEMY, GOTHENBURG UNIVERSITY, GOTHENBURG, SWEDEN; INSTITUTE OF PRIMARY HEALTH CARE, SAHLGRENSKA ACADEMY, GOTHENBURG UNIVERSITY, GOTHENBURG, SWEDEN; NORDIC SCHOOL OF PUBLIC HEALTH, GOT…	BACKGROUND: OBESITY IS ASSOCIATED WITH INCREASED MORTALITY. WEIGHT LOSS IMPROVES CARDIOVASCULAR RISK FACTORS, BUT NO PROSPECTIVE INTERVENTIONAL STUDIES HAVE REPORTED WHETHER WEIGHT LOSS DECREASES OVERALL MORTALITY. IN FACT, MANY OBSERVATIONAL STUDIES SUGGEST THAT WEIGHT REDUCTION IS ASSOCIATED WITH INCREASED MORTALITY. METHODS: THE PROSPECTIVE, CONTROLLED SWEDISH OBESE SUBJECTS STUDY INVOLVED 404…			00284793	NEW ENGL. J. MED.	NEW ENGLAND JOURNAL OF MEDICINE	ENGLISH		741 – 752	MASSACHUSSETTS MEDICAL SOCIETY		4040	SJÖSTRÖM L;NARBRO K;SJÖSTRÖM C;KARASON K;LARSSON B;WEDEL H;LYSTIG T;SULLIVAN M;BOUCHARD C;CARLSSON B;BENGTSSON C;DAHLGREN S;GUMMESSON A;JACOBSON P;KARLSSON J;LINDROOS A;LÖNROTH H;NÄSLUND I;OLBERS T;STENLÖF K;TORGERSON J;ÅGREN G;CARLSSON L	10.1056/NEJMoa066254	EFFECTS OF BARIATRIC SURGERY ON MORTALITY IN SWEDISH OBESE SUBJECTS	3	2007	SJÖSTRÖM LARS;NARBRO KRISTINA;SJÖSTRÖM C DAVID;KARASON KRISTJAN;LARSSON BO;WEDEL HANS;LYSTIG TED;SULLIVAN MARIANNE;BOUCHARD CLAUDE;CARLSSON BJÖRN;BENGTSSON CALLE;DAHLGREN SVEN;GUMMESSON ANDERS;JACOBSON PETER;KARLSSON JAN;LINDROOS ANNA-KARIN;LÖNROTH HANS;NÄSLUND INGMAR;OLBERS TORSTEN;STENLÖF KAJ;TORGERSON JARL;ÅGREN GÖRAN;CARLSSON LENA MS	L. SJÖSTRÖM; SWEDISH OBESE SUBJECTS SECRETARIAT, SAHLGRENSKA UNIVERSITY HOSPITAL, S-413 45 GOTHENBURG, VITA STRÅKET 15, SWEDEN; EMAIL: LARS.SJOSTROM@MEDFAK.GU.SE		GOTHENBURG UNIVERSITY;GOTHENBURG UNIVERSITY;GOTHENBURG UNIVERSITY;GOTHENBURG UNIVERSITY;NORDIC SCHOOL OF PUBLIC HEALTH;UNIVERSITY HOSPITAL;NORTHERN ÄLVSBORG HOSPITAL;LOUISIANA STATE UNIVERSITY SYSTEM;CAMBRIDGE UNIVERSITY;SAHLGRENSKA UNIVERSITY HOSPITAL	SJÖSTRÖM L, 2007, NEW ENGL J MED	https://www.scopus.com/inward/record.uri?eid=2-s2.0-34548090763&doi=10.1056%2fNEJMoa066254&partnerID=40&md5=0793ab1a15ba4b7f452a3874b17874be	SCOPUS
BODY MASS INDEX; DIABETES MELLITUS; ENERGY INTAKE; EXERCISE; FEMALE; FOLLOW-UP STUDIES; GASTRIC BYPASS; GASTROPLASTY; HUMANS; HYPERLIPIDEMIAS; HYPERTENSION; HYPERURICEMIA; INCIDENCE; LIFE STYLE; MALE; MIDDLE AGED; OBESITY; RISK FACTORS; TREATMENT OUTCOME; WEIGHT LOSS; HIGH DENSITY LIPOPROTEIN CHOLESTEROL; ADULT; ARTICLE; BARIATRIC SURGERY; BLEEDING; CALORIC INTAKE; CANCER; CARDIOVASCULAR RISK; CL…	BODY MASS INDEX; DIABETES MELLITUS; ENERGY INTAKE; EXERCISE; FEMALE; FOLLOW-UP STUDIES; GASTRIC BYPASS; GASTROPLASTY; HUMANS; HYPERLIPIDEMIAS; HYPERTENSION; HYPERURICEMIA; INCIDENCE; LIFE STYLE; MALE; MIDDLE AGED; OBESITY; RISK FACTORS; TREATMENT OUTCOME; WEIGHT LOSS; HIGH DENSITY LIPOPROTEIN CHOLESTEROL; ADULT; ARTICLE; BARIATRIC SURGERY; BLEEDING; CALORIC INTAKE; CANCER; CARDIOVASCULAR RISK; CL…	DEPT. BODY COMPOSITION AND METAB., SAHLGRENSKA UNIVERSITY HOSPITAL, GÖTEBORG, SWEDEN; DEPARTMENT OF ANESTHESIOLOGY, SAHLGRENSKA UNIVERSITY HOSPITAL, GÖTEBORG, SWEDEN; NORDIC UNIVERSITY OF PUBLIC HEALTH, GÖTEBORG, SWEDEN; MEDICAL DEPARTMENT, NORRA ÄLVSBORGS LÄNS HOSP., TROLLHÄTTAN, SWEDEN; BÖRJEGATAN 10B, UPPSALA, SWEDEN; DEPT. OF EPIDEMIOL. AND HLTH. PROM., NATIONAL PUBLIC HEALTH INSTITUTE, HELSI…	BACKGROUND: WEIGHT LOSS IS ASSOCIATED WITH SHORT-TERM AMELIORATION AND PREVENTION OF METABOLIC AND CARDIOVASCULAR RISK, BUT WHETHER THESE BENEFITS PERSIST OVER TIME IS UNKNOWN. METHODS: THE PROSPECTIVE, CONTROLLED SWEDISH OBESE SUBJECTS STUDY INVOLVED OBESE SUBJECTS WHO UNDERWENT GASTRIC SURGERY AND CONTEMPORANEOUSLY MATCHED, CONVENTIONALLY TREATED OBESE CONTROL SUBJECTS. WE NOW REPORT FOLLOW-UP …			00284793	NEW ENGL. J. MED.	NEW ENGLAND JOURNAL OF MEDICINE	ENGLISH		2683 – 2693			3975	SJÖSTRÖM L;LINDROOS A;PELTONEN M;TORGERSON J;BOUCHARD C;CARLSSON B;DAHLGREN S;LARSSON B;NARBRO K;SJÖSTRÖM C;SULLIVAN M;WEDEL H	10.1056/NEJMoa035622	LIFESTYLE DIABETES AND CARDIOVASCULAR RISK FACTORS 10 YEARS AFTER BARIATRIC SURGERY	1	2004	SJÖSTRÖM LARS;LINDROOS ANNA-KARIN;PELTONEN MARKKU;TORGERSON JARL;BOUCHARD CLAUDE;CARLSSON BJÖRN;DAHLGREN SVEN;LARSSON BO;NARBRO KRISTINA;SJÖSTRÖM CARL DAVID;SULLIVAN MARIANNE;WEDEL HANS			SAHLGRENSKA UNIVERSITY HOSPITAL;SAHLGRENSKA UNIVERSITY HOSPITAL;NORDIC UNIVERSITY OF PUBLIC HEALTH;NORRA ÄLVSBORGS LÄNS HOSP.;NATIONAL PUBLIC HEALTH INSTITUTE;LOUISIANA STATE UNIVERSITY;SAHLGRENSKA UNIVERSITY HOSPITAL	SJÖSTRÖM L, 2004, NEW ENGL J MED	https://www.scopus.com/inward/record.uri?eid=2-s2.0-10844295087&doi=10.1056%2fNEJMoa035622&partnerID=40&md5=92375c4c7776423a95dab7b756630b6b	SCOPUS
ADULT; BLOOD GLUCOSE; BODY MASS INDEX; CHOLESTEROL; HDL; COMBINED MODALITY THERAPY; DIABETES MELLITUS; TYPE 2; FEMALE; GASTRECTOMY; GASTRIC BYPASS; HEMOGLOBIN A; GLYCOSYLATED; HUMANS; HYPOGLYCEMIC AGENTS; INSULIN; MALE; MIDDLE AGED; OBESITY; TREATMENT OUTCOME; TRIGLYCERIDES; HEMOGLOBIN A1C; HIGH DENSITY LIPOPROTEIN CHOLESTEROL; TRIACYLGLYCEROL; ANTIDIABETIC AGENT; GLUCOSE BLOOD LEVEL; GLYCOSYLATE…	ADULT; BLOOD GLUCOSE; BODY MASS INDEX; CHOLESTEROL; HDL; COMBINED MODALITY THERAPY; DIABETES MELLITUS; TYPE 2; FEMALE; GASTRECTOMY; GASTRIC BYPASS; HEMOGLOBIN A; GLYCOSYLATED; HUMANS; HYPOGLYCEMIC AGENTS; INSULIN; MALE; MIDDLE AGED; OBESITY; TREATMENT OUTCOME; TRIGLYCERIDES; HEMOGLOBIN A1C; HIGH DENSITY LIPOPROTEIN CHOLESTEROL; INSULIN; TRIACYLGLYCEROL; ANTIDIABETIC AGENT; GLUCOSE BLOOD LEVEL; GL…	BARIATRIC AND METABOLIC INSTITUTE, CLEVELAND CLINIC, M61, 9500 EUCLID AVE, CLEVELAND, 44195, OH, UNITED STATES; LERNER RESEARCH INSTITUTE, CLEVELAND CLINIC, CLEVELAND, UNITED STATES; CLEVELAND CLINIC COORDINATING CENTER FOR CLINICAL RESEARCH, CLEVELAND CLINIC, CLEVELAND, UNITED STATES; COLE EYE INSTITUTE, CLEVELAND CLINIC, CLEVELAND, UNITED STATES; ENDOCRINOLOGY INSTITUTE, CLEVELAND CLINIC, CLEVE…	BACKGROUND LONG-TERM RESULTS FROM RANDOMIZED, CONTROLLED TRIALS THAT COMPARE MEDICAL THERAPY WITH SURGICAL THERAPY IN PATIENTS WITH TYPE 2 DIABETES ARE LIMITED. METHODS WE ASSESSED OUTCOMES 5 YEARS AFTER 150 PATIENTS WHO HAD TYPE 2 DIABETES AND A BODYMASS INDEX (BMI; THE WEIGHT IN KILOGRAMS DIVIDED BY THE SQUARE OF THE HEIGHT IN METERS) OF 27 TO 43 WERE RANDOMLY ASSIGNED TO RECEIVE INTENSIVE MEDI…			00284793	NEW ENGL. J. MED.	NEW ENGLAND JOURNAL OF MEDICINE	ENGLISH		641 – 651	MASSACHUSSETTS MEDICAL SOCIETY		2140	SCHAUER P;BHATT D;KIRWAN J;WOLSKI K;AMINIAN A;BRETHAUER S;NAVANEETHAN S;SINGH R;POTHIER C;NISSEN S;KASHYAP S	10.1056/NEJMoa1600869	BARIATRIC SURGERY VERSUS INTENSIVE MEDICAL THERAPY FOR DIABETES 5YEAR OUTCOMES	2	2017	SCHAUER PHILIP R;BHATT DEEPAK L;KIRWAN JOHN P;WOLSKI KATHY;AMINIAN ALI;BRETHAUER STACY A;NAVANEETHAN SANKAR D;SINGH RISHI P;POTHIER CLAIRE E;NISSEN STEVEN E;KASHYAP SANGEETA R	P.R. SCHAUER; BARIATRIC AND METABOLIC INSTITUTE, CLEVELAND CLINIC, CLEVELAND, M61, 9500 EUCLID AVE, 44195, UNITED STATES; EMAIL: SCHAUEP@CCF.ORG		BARIATRIC AND METABOLIC INSTITUTE;LERNER RESEARCH INSTITUTE;CLEVELAND CLINIC COORDINATING CENTER FOR CLINICAL RESEARCH;COLE EYE INSTITUTE;ENDOCRINOLOGY INSTITUTE;BRIGHAM AND WOMEN'S HOSPITAL HEART AND VASCULAR CENTER AND HARVARD MEDICAL SCHOOL;BAYLOR COLLEGE OF MEDICINE	SCHAUER P, 2017, NEW ENGL J MED	https://www.scopus.com/inward/record.uri?eid=2-s2.0-85013391679&doi=10.1056%2fNEJMoa1600869&partnerID=40&md5=e75225b66cb06c7aa3b69f148246556d	SCOPUS
							NEW ENGL. J. MED.	NEW ENGLAND JOURNAL OF MEDICINE	ENGLISH					2137	CUMMINGS D;WEIGLE D;FRAYO R;BREEN P;MA M;DELLINGER E;PURNELL J	10.1056/NEJMoa012908	Plasma ghrelin levels after diet-induced weight loss or gastric bypass surgery	1	2002	CUMMINGS D E;WEIGLE D S;FRAYO R S;BREEN P A;MA M K;DELLINGER E P;PURNELL J Q		Obesity surgery; NAS	CUMMINGS D E, 2002, NEW ENGL J MED	CUMMINGS D E, 2002, NEW ENGL J MED
ANGIOTENSIN RECEPTOR ANTAGONIST; ANTICOAGULANT AGENT; ANTIHYPERTENSIVE AGENT; ANTILIPEMIC AGENT; BETA ADRENERGIC RECEPTOR BLOCKING AGENT; BIGUANIDE DERIVATIVE; CALCIUM CHANNEL BLOCKING AGENT; DIPEPTIDYL CARBOXYPEPTIDASE INHIBITOR; DIURETIC AGENT; GLITAZONE DERIVATIVE; GLYCOSYLATED HEMOGLOBIN; GROWTH HORMONE SECRETAGOGUE; HEMOGLOBIN; INCRETIN; INSULIN; ADULT; ADVERSE OUTCOME; ANEMIA; ARTICLE; BARI…	ANGIOTENSIN RECEPTOR ANTAGONIST; ANTICOAGULANT AGENT; ANTIHYPERTENSIVE AGENT; ANTILIPEMIC AGENT; BETA ADRENERGIC RECEPTOR BLOCKING AGENT; BIGUANIDE DERIVATIVE; CALCIUM CHANNEL BLOCKING AGENT; DIPEPTIDYL CARBOXYPEPTIDASE INHIBITOR; DIURETIC AGENT; GLITAZONE DERIVATIVE; GLYCOSYLATED HEMOGLOBIN; GROWTH HORMONE SECRETAGOGUE; HEMOGLOBIN; INCRETIN; INSULIN; ADULT; ADVERSE OUTCOME; ANEMIA; ARTICLE; BARI…	BARIATRIC AND METABOLIC INSTITUTE, CLEVELAND CLINIC M61, CLEVELAND, OH 44195, 9500 EUCLID AVE., UNITED STATES; ENDOCRINOLOGY INSTITUTE, CLEVELAND CLINIC, CLEVELAND, OH, UNITED STATES; CLEVELAND CLINIC COORDINATING CENTER FOR CLINICAL RESEARCH, CLEVELAND CLINIC, CLEVELAND, OH, UNITED STATES; HEART AND VASCULAR INSTITUTE, CLEVELAND CLINIC, CLEVELAND, OH, UNITED STATES; LERNER RESEARCH INSTITUTE, CL…	BACKGROUND: OBSERVATIONAL STUDIES HAVE SHOWN IMPROVEMENT IN PATIENTS WITH TYPE 2 DIABETES MELLITUS AFTER BARIATRIC SURGERY. METHODS: IN THIS RANDOMIZED, NONBLINDED, SINGLE-CENTER TRIAL, WE EVALUATED THE EFFICACY OF INTENSIVE MEDICAL THERAPY ALONE VERSUS MEDICAL THERAPY PLUS ROUX-EN-Y GASTRIC BY-PASS OR SLEEVE GASTRECTOMY IN 150 OBESE PATIENTS WITH UNCONTROLLED TYPE 2 DIABETES. THE MEAN (±SD) AGE …			00284793	NEW ENGL. J. MED.	NEW ENGLAND JOURNAL OF MEDICINE	ENGLISH		1567 – 1576	MASSACHUSSETTS MEDICAL SOCIETY		1985	SCHAUER P;KASHYAP S;WOLSKI K;BRETHAUER S;KIRWAN J;POTHIER C;THOMAS S;ABOOD B;NISSEN S;BHATT D	10.1056/NEJMoa1200225	BARIATRIC SURGERY VERSUS INTENSIVE MEDICAL THERAPY IN OBESE PATIENTS WITH DIABETES	2	2012	SCHAUER PHILIP R;KASHYAP SANGEETA R;WOLSKI KATHY;BRETHAUER STACY A;KIRWAN JOHN P;POTHIER CLAIRE E;THOMAS SUSAN;ABOOD BETH;NISSEN STEVEN E;BHATT DEEPAK L	P.R. SCHAUER; BARIATRIC AND METABOLIC INSTITUTE, CLEVELAND CLINIC M61, CLEVELAND, OH 44195, 9500 EUCLID AVE., UNITED STATES; EMAIL: SCHAUEP@CCF.ORG		BARIATRIC AND METABOLIC INSTITUTE;ENDOCRINOLOGY INSTITUTE;CLEVELAND CLINIC COORDINATING CENTER FOR CLINICAL RESEARCH;HEART AND VASCULAR INSTITUTE;LERNER RESEARCH INSTITUTE;VETERANS AFFAIRS BOSTON HEALTHCARE SYSTEM;BRIGHAM AND WOMEN'S HOSPITAL;HARVARD MEDICAL SCHOOL	SCHAUER P, 2012, NEW ENGL J MED	https://www.scopus.com/inward/record.uri?eid=2-s2.0-84860136615&doi=10.1056%2fNEJMoa1200225&partnerID=40&md5=c98524dab71c362c74559a7b8c4ad3e7	SCOPUS
CARDIOVASCULAR RISK-FACTORS; GASTRIC BYPASS; WEIGHT-LOSS; GLUCOSE; OBESE; LIFE	CARDIOVASCULAR RISK-FACTORS; GASTRIC BYPASS; WEIGHT-LOSS; GLUCOSE; OBESE; LIFE	MINGRONE, G (CORRESPONDING AUTHOR), UNIV CATTOLICA SACRO CUORE, DEPT INTERNAL MED, LARGO A GEMELLI 8, I-00168 ROME, ITALY.; MINGRONE, GELTRUDE; GUIDONE, CATERINA; IACONELLI, AMERIGO; LECCESI, LAURA; GHIRLANDA, GIOVANNI, UNIV CATTOLICA SACRO CUORE, DEPT INTERNAL MED, I-00168 ROME, ITALY.; NANNI, GIUSEPPE; CASTAGNETO, MARCO; RUBINO, FRANCESCO, UNIV CATTOLICA SACRO CUORE, DEPT SURG, I-00168 ROME, IT…	BACKGROUND ROUX-EN-Y GASTRIC BYPASS AND BILIOPANCREATIC DIVERSION CAN MARKEDLY AMELIORATE DIABETES IN MORBIDLY OBESE PATIENTS, OFTEN RESULTING IN DISEASE REMISSION. PROSPECTIVE, RANDOMIZED TRIALS COMPARING THESE PROCEDURES WITH MEDICAL THERAPY FOR THE TREATMENT OF DIABETES ARE NEEDED. METHODS IN THIS SINGLE-CENTER, NONBLINDED, RANDOMIZED, CONTROLLED TRIAL, 60 PATIENTS BETWEEN THE AGES OF 30 AND 6…	WALTHAM WOODS CENTER, 860 WINTER ST,, WALTHAM, MA 02451-1413 USA	CATHOLIC UNIVERSITY OF THE SACRED HEART; IRCCS POLICLINICO GEMELLI; CATHOLIC UNIVERSITY OF THE SACRED HEART; IRCCS POLICLINICO GEMELLI; CONSIGLIO NAZIONALE DELLE RICERCHE (CNR); ISTITUTO DI ANALISI DEI SISTEMI ED INFORMATICA ``ANTONIO RUBERTI'' (IASI-CNR); CORNELL UNIVERSITY; WEILL CORNELL MEDICINE; NEWYORK-PRESBYTERIAN HOSPITAL	0028-4793	N. ENGL. J. MED.	NEW ENGLAND JOURNAL OF MEDICINE	ENGLISH	PANUNZI, SIMONA/0000-0003-0956-8578 IACONELLI, AMERIGO/0009-0004-0812-4291 MINGRONE, GELTRUDE/0000-0003-2021-528X DE GAETANO, ANDREA/0000-0001-7712-056X GUIDONE, CATERINA/0000-0002-0241-7083	1577-1585	MASSACHUSETTS MEDICAL SOC	GENERAL \& INTERNAL MEDICINE	1601	MINGRONE G;PANUNZI S;DE G A;GUIDONE C;IACONELLI A;LECCESI L;NANNI ;GIUSEPPE G;POMP A;CASTAGNETO M;GHIRLANDA G;RUBINO F	10.1056/NEJMoa1200111	BARIATRIC SURGERY VERSUS CONVENTIONAL MEDICAL THERAPY FOR TYPE 2 DIABETES	2	2012	MINGRONE GELTRUDE;PANUNZI SIMONA;DE GAETANO ANDREA; GUIDONE CATERINA;IACONELLI AMERIGO;LECCESI LAURA;NANNI; GIUSEPPE;POMP ALFONS;CASTAGNETO MARCO;GHIRLANDA GIOVANNI;RUBINO FRANCESCO	MINGRONE, G (CORRESPONDING AUTHOR), UNIV CATTOLICA SACRO CUORE, DEPT INTERNAL MED, LARGO A GEMELLI 8, I-00168 ROME, ITALY		UNIV CATTOLICA SACRO CUORE;UNIV CATTOLICA SACRO CUORE;UNIV CATTOLICA SACRO CUORE;INST SYST ANAL AND COMP SCI IASI;CORNELL UNIV	MINGRONE G, 2012, N ENGL J MED		ISI
ADULT; BIOLOGICAL MARKERS; BODY MASS INDEX; CHOLESTEROL; LDL; COMBINED MODALITY THERAPY; DIABETES MELLITUS; TYPE 2; FEMALE; FOLLOW-UP STUDIES; GASTRECTOMY; GASTRIC BYPASS; HEMOGLOBIN A; GLYCOSYLATED; HUMANS; HYPOGLYCEMIC AGENTS; MALE; MIDDLE AGED; OBESITY; POSTOPERATIVE COMPLICATIONS; QUALITY OF LIFE; TRIGLYCERIDES; WEIGHT LOSS; GLUCOSE; HEMOGLOBIN A1C; HIGH DENSITY LIPOPROTEIN CHOLESTEROL; INSUL…	ADULT; BIOLOGICAL MARKERS; BODY MASS INDEX; CHOLESTEROL; LDL; COMBINED MODALITY THERAPY; DIABETES MELLITUS; TYPE 2; FEMALE; FOLLOW-UP STUDIES; GASTRECTOMY; GASTRIC BYPASS; HEMOGLOBIN A; GLYCOSYLATED; HUMANS; HYPOGLYCEMIC AGENTS; MALE; MIDDLE AGED; OBESITY; POSTOPERATIVE COMPLICATIONS; QUALITY OF LIFE; TRIGLYCERIDES; WEIGHT LOSS; GLUCOSE; HEMOGLOBIN A1C; HIGH DENSITY LIPOPROTEIN CHOLESTEROL; INSUL…	BARIATRIC AND METABOLIC INSTITUTE, CLEVELAND CLINIC, CLEVELAND, OH, UNITED STATES; LERNER RESEARCH INSTITUTE, CLEVELAND CLINIC, CLEVELAND, OH, UNITED STATES; HEART AND VASCULAR INSTITUTE, CLEVELAND CLINIC, CLEVELAND, OH, UNITED STATES; UROLOGICAL AND KIDNEY INSTITUTE, CLEVELAND CLINIC, CLEVELAND, OH, UNITED STATES; ENDOCRINOLOGY INSTITUTE, CLEVELAND CLINIC, CLEVELAND, OH, UNITED STATES; BRIGHAM A…	BACKGROUND: IN SHORT-TERM RANDOMIZED TRIALS (DURATION, 1 TO 2 YEARS), BARIATRIC SURGERY HAS BEEN ASSOCIATED WITH IMPROVEMENT IN TYPE 2 DIABETES MELLITUS. METHODS WE ASSESSED OUTCOMES 3 YEARS AFTER THE RANDOMIZATION OF 150 OBESE PATIENTS WITH UNCONTROLLED TYPE 2 DIABETES TO RECEIVE EITHER INTENSIVE MEDICAL THERAPY ALONE OR INTENSIVE MEDICAL THERAPY PLUS ROUX-EN-Y GASTRIC BYPASS OR SLEEVE GASTRECTO…			00284793	NEW ENGL. J. MED.	NEW ENGLAND JOURNAL OF MEDICINE	ENGLISH		2002 – 2013	MASSACHUSSETTS MEDICAL SOCIETY		1374	SCHAUER P;BHATT D;KIRWAN J;WOLSKI K;BRETHAUER S;NAVANEETHAN S;AMINIAN A;POTHIER C;KIM E;NISSEN S;KASHYAP S	10.1056/NEJMoa1401329	BARIATRIC SURGERY VERSUS INTENSIVE MEDICAL THERAPY FOR DIABETES 3YEAR OUTCOMES	2*	2014	SCHAUER PHILIP R;BHATT DEEPAK L;KIRWAN JOHN P;WOLSKI KATHY;BRETHAUER STACY A;NAVANEETHAN SANKAR D;AMINIAN ALI;POTHIER CLAIRE E;KIM ESTHER S H;NISSEN STEVEN E;KASHYAP SANGEETA R	P.R. SCHAUER; BARIATRIC AND METABOLIC INSTITUTE, CLEVELAND CLINIC, M61, CLEVELAND, OH 44195, 9500 EUCLID AVE., UNITED STATES; EMAIL: SCHAUEP@CCF.ORG		BARIATRIC AND METABOLIC INSTITUTE;LERNER RESEARCH INSTITUTE;HEART AND VASCULAR INSTITUTE;UROLOGICAL AND KIDNEY INSTITUTE;ENDOCRINOLOGY INSTITUTE;BRIGHAM AND WOMEN'S HOSPITAL HEART AND VASCULAR CENTER;HARVARD MEDICAL SCHOOL	SCHAUER P, 2014, NEW ENGL J MED	https://www.scopus.com/inward/record.uri?eid=2-s2.0-84900335025&doi=10.1056%2fNEJMoa1401329&partnerID=40&md5=7ee1095fd2f563455bd87d1489cd893b	SCOPUS
ADOLESCENT; ADULT; ARTICLE; BARIATRIC SURGERY; BODY MASS; BODY WEIGHT; CARDIOVASCULAR RISK; CARDIOVASCULAR SYSTEM; CHILD; CONTROLLED STUDY; FEMALE; GASTRIC BANDING; GASTROPLASTY; HAZARD RATIO; HEALTH CARE SYSTEM; HEART INFARCTION; HUMAN; INCIDENCE; INFANT; LABORATORY TEST; LAPAROSCOPIC SURGERY; LONG TERM CARE; MAJOR CLINICAL STUDY; MALE; MORTALITY; OBESITY; OUTCOME ASSESSMENT; PHYSICAL EXAMINATIO…	ADOLESCENT; ADULT; ARTICLE; BARIATRIC SURGERY; BODY MASS; BODY WEIGHT; CARDIOVASCULAR RISK; CARDIOVASCULAR SYSTEM; CHILD; CONTROLLED STUDY; FEMALE; GASTRIC BANDING; GASTROPLASTY; HAZARD RATIO; HEALTH CARE SYSTEM; HEART INFARCTION; HUMAN; INCIDENCE; INFANT; LABORATORY TEST; LAPAROSCOPIC SURGERY; LONG TERM CARE; MAJOR CLINICAL STUDY; MALE; MORTALITY; OBESITY; OUTCOME ASSESSMENT; PHYSICAL EXAMINATIO…	INSTITUTE OF MEDICINE, SAHLGRENSKA ACADEMY, UNIVERSITY OF GOTHENBURG, GOTHENBURG, SWEDEN; INSTITUTE OF SURGERY, SAHLGRENSKA ACADEMY, UNIVERSITY OF GOTHENBURG, GOTHENBURG, SWEDEN; INSTITUTE OF PRIMARY HEALTH CARE, SAHLGRENSKA ACADEMY, UNIVERSITY OF GOTHENBURG, GOTHENBURG, SWEDEN; INSTITUTE OF HEALTH AND CARE SCIENCES, SAHLGRENSKA ACADEMY, UNIVERSITY OF GOTHENBURG, GOTHENBURG, SWEDEN; CHRONIC DISEA…	CONTEXT: OBESITY IS A RISK FACTOR FOR CARDIOVASCULAR EVENTS. WEIGHT LOSS MIGHT PROTECT AGAINST CARDIOVASCULAR EVENTS, BUT SOLID EVIDENCE IS LACKING. OBJECTIVE: TO STUDY THE ASSOCIATION BETWEEN BARIATRIC SURGERY, WEIGHT LOSS, AND CARDIOVASCULAR EVENTS. DESIGN, SETTING, AND PARTICIPANTS: THE SWEDISH OBESE SUBJECTS (SOS) STUDY IS AN ONGOING, NONRANDOMIZED, PROSPECTIVE, CONTROLLED STUDY CONDUCTED AT …			00987484	J. AM. MED. ASSOC.	JAMA	ENGLISH		56 – 65	AMERICAN MEDICAL ASSOCIATION		1202	SJÖSTRÖM L;PELTONEN M;JACOBSON P;SJÖSTRÖM C;KARASON K;WEDEL H;AHLIN S;ANVEDEN ;BENGTSSON C;BERGMARK G;BOUCHARD C;CARLSSON B;DAHLGREN S;KARLSSON J;LINDROOS A;LÖNROTH H;NARBRO K;NÄSLUND I;OLBERS T;SVENSSON P;CARLSSON L	10.1001/jama.2011.1914	BARIATRIC SURGERY AND LONGTERM CARDIOVASCULAR EVENTS	3	2012	SJÖSTRÖM LARS;PELTONEN MARKKU;JACOBSON PETER;SJÖSTRÖM C DAVID;KARASON KRISTJAN;WEDEL HANS;AHLIN SOFIE;ANVEDEN ÅSA;BENGTSSON CALLE;BERGMARK GERD;BOUCHARD CLAUDE;CARLSSON BJÖRN;DAHLGREN SVEN;KARLSSON JAN;LINDROOS ANNA-KARIN;LÖNROTH HANS;NARBRO KRISTINA;NÄSLUND INGMAR;OLBERS TORSTEN;SVENSSON PER-ARNE;CARLSSON LENA M S	L. SJÖSTRÖM; INSTITUTE OF MEDICINE, SAHLGRENSKA UNIVERSITY HOSPITAL, S-413 45 GOTHENBURG, VITA STRAKET 15, SWEDEN; EMAIL: LARS.V.SJOSTROM@MEDFAK.GU.SE		UNIVERSITY OF GOTHENBURG;UNIVERSITY OF GOTHENBURG;UNIVERSITY OF GOTHENBURG;UNIVERSITY OF GOTHENBURG;NATIONAL INSTITUTE FOR HEALTH AND WELFARE;NORDIC SCHOOL OF PUBLIC HEALTH;LOUISIANA STATE UNIVERSITY SYSTEM;UMEÅ UNIVERSITY HOSPITAL;DEPARTMENT OF HEALTH CARE;UNIVERSITY HOSPITAL	SJÖSTRÖM L, 2012, J AM MED ASSOC	https://www.scopus.com/inward/record.uri?eid=2-s2.0-84855367738&doi=10.1001%2fjama.2011.1914&partnerID=40&md5=ade03c7a6379b39a4aeed713875519bc	SCOPUS
Y GASTRIC BYPASS; THERAPY; DISEASE; PLASMA; MODEL	Y GASTRIC BYPASS; THERAPY; DISEASE; PLASMA; MODEL	MINGRONE, G (CORRESPONDING AUTHOR), UNIV CATTOLICA SACRO CUORE, DEPT INTERNAL MED, I-00168 ROME, ITALY.; MINGRONE, GELTRUDE; GUIDONE, CATERINA; IACONELLI, AMERIGO, UNIV CATTOLICA SACRO CUORE, DEPT INTERNAL MED, I-00168 ROME, ITALY.; NANNI, GIUSEPPE; CASTAGNETO, MARCO, UNIV CATTOLICA SACRO CUORE, DEPT SURG, I-00168 ROME, ITALY.; PANUNZI, SIMONA; DE GAETANO, ANDREA, CNR, INST SYST ANAL \& COMP SCI,…	BACKGROUND RANDOMISED CONTROLLED TRIALS HAVE SHOWN THAT BARIATRIC SURGERY IS MORE EFFECTIVE THAN CONVENTIONAL TREATMENT FOR THE SHORT-TERM CONTROL OF TYPE-2 DIABETES. HOWEVER, PUBLISHED STUDIES ARE CHARACTERISED BY A RELATIVELY SHORT FOLLOW-UP. WE AIMED TO ASSESS 5 YEAR OUTCOMES FROM OUR RANDOMISED TRIAL DESIGNED TO COMPARE SURGERY WITH CONVENTIONAL MEDICAL TREATMENT FOR THE TREATMENT OF TYPE 2 D…	STE 800, 230 PARK AVE, NEW YORK, NY 10169 USA	CATHOLIC UNIVERSITY OF THE SACRED HEART; IRCCS POLICLINICO GEMELLI; CATHOLIC UNIVERSITY OF THE SACRED HEART; IRCCS POLICLINICO GEMELLI; CONSIGLIO NAZIONALE DELLE RICERCHE (CNR); ISTITUTO DI ANALISI DEI SISTEMI ED INFORMATICA ``ANTONIO RUBERTI'' (IASI-CNR); TECHNISCHE UNIVERSITAT DRESDEN; CARL GUSTAV CARUS UNIVERSITY HOSPITAL; UNIVERSITY OF LONDON; KING'S COLLEGE LONDON; UNIVERSITY OF LONDON; KING…	0140-6736	LANCET	LANCET	ENGLISH	IACONELLI, AMERIGO/0009-0004-0812-4291 GUIDONE, CATERINA/0000-0002-0241-7083 DE GAETANO, ANDREA/0000-0001-7712-056X PANUNZI, SIMONA/0000-0003-0956-8578 MINGRONE, GELTRUDE/0000-0003-2021-528X	964-973	ELSEVIER SCIENCE INC	GENERAL \& INTERNAL MEDICINE	1459	MINGRONE G;PANUNZI S;DE G A;GUIDONE C;IACONELLI A;NANNI G;CASTAGNETO M;BORNSTEIN S;RUBINO F	10.1016/S0140-6736(15)00075-6	BARIATRICMETABOLIC SURGERY VERSUS CONVENTIONAL MEDICAL TREATMENT IN OBESE PATIENTS WITH TYPE 2 DIABETES: 5 YEAR FOLLOWUP OF AN OPENLABEL SINGLECENTRE RANDOMISED CONTROLLED TRIAL	2	2015	MINGRONE GELTRUDE;PANUNZI SIMONA;DE GAETANO ANDREA; GUIDONE CATERINA;IACONELLI AMERIGO;NANNI GIUSEPPE; CASTAGNETO MARCO;BORNSTEIN STEFAN;RUBINO FRANCESCO	MINGRONE, G (CORRESPONDING AUTHOR), UNIV CATTOLICA SACRO CUORE, DEPT INTERNAL MED, I-00168 ROME, ITALY		UNIV CATTOLICA SACRO CUORE;UNIV CATTOLICA SACRO CUORE;UNIV CATTOLICA SACRO CUORE;INST SYST ANAL AND COMP SCI;UNIV CARL GUSTAV CARUS DRESDEN;KINGS COLL LONDON;KINGS COLL LONDON	MINGRONE G, 2015, LANCET		ISI
BARIATRIC SURGERY; BARRETTS-ESOPHAGUS; METAANALYSIS; OUTCOMES; IMPROVEMENT; VALIDATION; REFLUX; INDEX	BARIATRIC SURGERY; BARRETTS-ESOPHAGUS; METAANALYSIS; OUTCOMES; IMPROVEMENT; VALIDATION; REFLUX; INDEX	PETERLI, R (CORRESPONDING AUTHOR), ST CLARA HOSP, DEPT SURG, KLEINRIEHENSTR 30, CH-4016 BASEL, SWITZERLAND.; PETERLI, RALPH, ST CLARA HOSP, DEPT SURG, KLEINRIEHENSTR 30, CH-4016 BASEL, SWITZERLAND.; WOLNERHANSSEN, BETTINA KARIN; BEGLINGER, CHRISTOPH, ST CLARA HOSP, DEPT CLIN RES, BASEL, SWITZERLAND.; WOLNERHANSSEN, BETTINA KARIN, UNIV HOSP BASEL, DEPT BIOMED, BASEL, SWITZERLAND.; PETERS, THOMAS, …	IMPORTANCE SLEEVE GASTRECTOMY IS INCREASINGLY USED IN THE TREATMENT OF MORBID OBESITY, BUT ITS LONG-TERM OUTCOME VS THE STANDARD ROUX-EN-Y GASTRIC BYPASS PROCEDURE IS UNKNOWN. OBJECTIVE TO DETERMINE WHETHER THERE ARE DIFFERENCES BETWEEN SLEEVE GASTRECTOMY AND ROUX-EN-Y GASTRIC BYPASS IN TERMS OF WEIGHT LOSS, CHANGES IN COMORBIDITIES, INCREASE IN QUALITY OF LIFE, AND ADVERSE EVENTS. DESIGN, SETTIN…	330 N WABASH AVE, STE 39300, CHICAGO, IL 60611-5885 USA	UNIVERSITY OF BASEL; UNIVERSITY OF ZURICH; UNIVERSITY ZURICH HOSPITAL; UNIVERSITY OF BERN; UNIVERSITY HOSPITAL OF BERN; KANTONSSPITAL ST. GALLEN; KANTONSSPITAL AARAU AG (KSA)	0098-7484	JAMA-J. AM. MED. ASSOC.	JAMA-JOURNAL OF THE AMERICAN MEDICAL ASSOCIATION	ENGLISH	KROLL, DINO/0000-0001-8736-6619 WOLNERHANSSEN, BETTINA/0000-0003-3134-2743 PETERLI, RALPH/0000-0002-0038-9795 DREWE, JURGEN/0000-0001-5178-7825 BORBELY, YVES/0000-0003-1997-0675	255-265	AMER MEDICAL ASSOC	GENERAL \& INTERNAL MEDICINE	1008	PETERLI R;WOLNERHANSSEN B;PETERS T;VETTER D;KROLL D;BORBELY Y;SCHULTES B;BEGLINGER C;DREWE J;SCHIESSER M;NETT ;PHILIPP P;BUETER M	10.1001/jama.2017.20897	EFFECT OF LAPAROSCOPIC SLEEVE GASTRECTOMY VS LAPAROSCOPIC ROUXENY GASTRIC BYPASS ON WEIGHT LOSS IN PATIENTS WITH MORBID OBESITY THE SMBOSS RANDOMIZED CLINICAL TRIAL	2	2018	PETERLI RALPH;WOLNERHANSSEN BETTINA KARIN;PETERS THOMAS; VETTER DIANA;KROLL DINO;BORBELY YVES;SCHULTES BERND; BEGLINGER CHRISTOPH;DREWE JURGEN;SCHIESSER MARC;NETT; PHILIPP;BUETER MARCO	PETERLI, R (CORRESPONDING AUTHOR), ST CLARA HOSP, DEPT SURG, KLEINRIEHENSTR 30, CH-4016 BASEL, SWITZERLAND		ST CLARA HOSP;ST CLARA HOSP;ST CLARA HOSP;UNIV HOSP BASEL;ST CLARA HOSP;UNIV HOSP;UNIV HOSP BERN;SCHULTES;UNIV HOSP;SCHIESSER	PETERLI R, 2018, JAMA-J AM MED ASSOC		ISI
							ANN. SURG.	ANNALS OF SURGERY	ENGLISH					950	NGUYEN N;GOLDMAN C;ROSENQUIST C;ARANGO A;COLE C J;LEE S;WOLFE B	10.1097/00000658-200109000-00002	Laparoscopic Versus Open Gastric Bypass: A Randomized Study of Outcomes, Quality of Life, and Costs	1	2001	NGUYEN N T;GOLDMAN C;ROSENQUIST C J;ARANGO A;COLE C J;LEE S J;WOLFE B M			NGUYEN N T;GOLDMAN C;ROSENQUIST C J;ARANGO A;COLE C J;LEE S J;WOLFE B M	NGUYEN N, 2001, ANNALS OF SURGERY
GASTROESOPHAGEAL-REFLUX DISEASE; INTENSIVE MEDICAL-MANAGEMENT; TYPE-2; DIABETES-MELLITUS; TERM-FOLLOW-UP; BARIATRIC SURGERY; LIFE-STYLE; OUTCOMES; COMPLICATIONS; METAANALYSIS; MULTICENTER	GASTROESOPHAGEAL-REFLUX DISEASE; INTENSIVE MEDICAL-MANAGEMENT; TYPE-2; DIABETES-MELLITUS; TERM-FOLLOW-UP; BARIATRIC SURGERY; LIFE-STYLE; OUTCOMES; COMPLICATIONS; METAANALYSIS; MULTICENTER	SALMINEN, P (CORRESPONDING AUTHOR), POB 52, TURKU 20520, FINLAND.; SALMINEN, PAULINA; HELMIO, MIKA; OVASKA, JARI, TURKU UNIV HOSP, DIV DIGEST SURG \& UROL, TURKU, FINLAND.; SALMINEN, PAULINA; HELMIO, MIKA; OVASKA, JARI; VICTORZON, MIKAEL, UNIV TURKU, DEPT SURG, TURKU, FINLAND.; JUUTI, ANNE; LEIVONEN, MARJA, HELSINKI UNIV HOSP, ABDOMINAL CTR, DEPT ABDOMINAL SURG, HELSINKI, FINLAND.; JUUTI, ANNE; L…	IMPORTANCE LAPAROSCOPIC SLEEVE GASTRECTOMY FOR TREATMENT OF MORBID OBESITY HAS INCREASED SUBSTANTIALLY DESPITE THE LACK OF LONG-TERM RESULTS COMPARED WITH LAPAROSCOPIC ROUX-EN-Y GASTRIC BYPASS. OBJECTIVE TO DETERMINE WHETHER LAPAROSCOPIC SLEEVE GASTRECTOMY AND LAPAROSCOPIC ROUX-EN-Y GASTRIC BYPASS ARE EQUIVALENT FOR WEIGHT LOSS AT 5 YEARS IN PATIENTS WITH MORBID OBESITY. DESIGN, SETTING, AND PART…	330 N WABASH AVE, STE 39300, CHICAGO, IL 60611-5885 USA	UNIVERSITY OF TURKU; UNIVERSITY OF TURKU; UNIVERSITY OF HELSINKI; HELSINKI UNIVERSITY CENTRAL HOSPITAL; UNIVERSITY OF HELSINKI; SEINAJOKI CENTRAL HOSPITAL; VAASA CENTRAL HOSPITAL; UNIVERSITY OF TURKU; UNIVERSITY OF TURKU; UNIVERSITY OF TURKU	0098-7484	JAMA-J. AM. MED. ASSOC.	JAMA-JOURNAL OF THE AMERICAN MEDICAL ASSOCIATION	ENGLISH	SALMINEN, PAULINA/0000-0001-6435-9264 NUUTILA, PIRJO/0000-0001-9597-338X	241-254	AMER MEDICAL ASSOC	GENERAL \& INTERNAL MEDICINE	793	SALMINEN P;HELMIO M;OVASKA J;JUUTI A;LEIVONEN M;PEROMAA-HAAVISTO P;HURME S;SOINIO ;MINNA M;NUUTILA P;VICTORZON M	10.1001/jama.2017.20313	EFFECT OF LAPAROSCOPIC SLEEVE GASTRECTOMY VS LAPAROSCOPIC ROUXENY GASTRIC BYPASS ON WEIGHT LOSS AT 5 YEARS AMONG PATIENTS WITH MORBID OBESITY THE SLEEVEPASS RANDOMIZED CLINICAL TRIAL	2	2018	SALMINEN PAULINA;HELMIO MIKA;OVASKA JARI;JUUTI ANNE; LEIVONEN MARJA;PEROMAA-HAAVISTO PIPSA;HURME SAIJA;SOINIO; MINNA;NUUTILA PIRJO;VICTORZON MIKAEL	SALMINEN, P (CORRESPONDING AUTHOR), POB 52, TURKU 20520, FINLAND		P (CORRESPONDING AUTHOR);TURKU UNIV HOSP;UNIV TURKU;HELSINKI UNIV HOSP;UNIV HELSINKI;SEINAJOKI CENT HOSP;VAASA CENT HOSP;HATANPAA CITY HOSP;UNIV TURKU;TURKU UNIV HOSP;UNIV TURKU	SALMINEN P, 2018, JAMA-J AM MED ASSOC		ISI
CARDIOVASCULAR RISK-FACTORS; BARIATRIC SURGERY; LIFE-STYLE; THERAPY; ADULTS	CARDIOVASCULAR RISK-FACTORS; BARIATRIC SURGERY; LIFE-STYLE; THERAPY; ADULTS	IKRAMUDDIN, S (CORRESPONDING AUTHOR), UNIV MINNESOTA, DEPT SURG, 420 DELAWARE ST SE,MMC290, MINNEAPOLIS, MN 55455 USA.; IKRAMUDDIN, SAYEED; LESLIE, DANIEL B., UNIV MINNESOTA, DEPT SURG, MINNEAPOLIS, MN 55455 USA.; CONNETT, JOHN E.; THOMAS, AVIS J., UNIV MINNESOTA, DIV BIOSTAT, MINNEAPOLIS, MN 55455 USA.; JEFFERY, ROBERT W., UNIV MINNESOTA, DIV EPIDEMIOL \& COMMUNITY HLTH, MINNEAPOLIS, MN 55455 US…	IMPORTANCE CONTROLLING GLYCEMIA, BLOOD PRESSURE, AND CHOLESTEROL IS IMPORTANT FOR PATIENTS WITH DIABETES. HOW BEST TO ACHIEVE THIS GOAL IS UNKNOWN. OBJECTIVE TO COMPARE ROUX-EN-Y GASTRIC BYPASS WITH LIFESTYLE AND INTENSIVE MEDICAL MANAGEMENT TO ACHIEVE CONTROL OF COMORBID RISK FACTORS. DESIGN, SETTING, AND PARTICIPANTS A 12-MONTH, 2-GROUP UNBLINDED RANDOMIZED TRIAL AT 4 TEACHING HOSPITALS IN THE …	330 N WABASH AVE, STE 39300, CHICAGO, IL 60611-5885 USA	UNIVERSITY OF MINNESOTA SYSTEM; UNIVERSITY OF MINNESOTA TWIN CITIES; UNIVERSITY OF MINNESOTA SYSTEM; UNIVERSITY OF MINNESOTA TWIN CITIES; UNIVERSITY OF MINNESOTA SYSTEM; UNIVERSITY OF MINNESOTA TWIN CITIES; UNIVERSITY OF MINNESOTA SYSTEM; UNIVERSITY OF MINNESOTA TWIN CITIES; UNIVERSITY OF MINNESOTA SYSTEM; UNIVERSITY OF MINNESOTA TWIN CITIES; COLUMBIA UNIVERSITY; COLUMBIA UNIVERSITY; NATIONAL TAI…	0098-7484	JAMA-J. AM. MED. ASSOC.	JAMA-JOURNAL OF THE AMERICAN MEDICAL ASSOCIATION	ENGLISH	CHUANG, LEE-MING/0000-0003-0978-2662	2240-2249	AMER MEDICAL ASSOC	GENERAL \& INTERNAL MEDICINE	671	IKRAMUDDIN S;KORNER J;LEE W;CONNETT J;E. E;INABNET W;BILLINGTON C;THOMAS ;AVIS J A;LESLIE D;CHONG K;JEFFERY R;AHMED L;VELLA A;CHUANG L;BESSLER ;MARC M;SARR M;SWAIN J;LAQUA P;JENSEN M;BANTLE J	10.1001/jama.2013.5835	ROUXENY GASTRIC BYPASS VS INTENSIVE MEDICAL MANAGEMENT FOR THE CONTROL OF TYPE 2 DIABETES HYPERTENSION AND HYPERLIPIDEMIA THE DIABETES SURGERY STUDY RANDOMIZED CLINICAL TRIAL	1	2013	IKRAMUDDIN SAYEED;KORNER JUDITH;LEE WEI-JEI;CONNETT JOHN; E;INABNET III WILLIAM B;BILLINGTON CHARLES J;THOMAS; AVIS J;LESLIE DANIEL B;CHONG KEONG;JEFFERY ROBERT W;AHMED LEAQUE;VELLA ADRIAN;CHUANG LEE-MING;BESSLER; MARC;SARR MICHAEL G;SWAIN JAMES M;LAQUA PATRICIA; JENSEN MICHAEL D;BANTLE JOHN P	IKRAMUDDIN, S (CORRESPONDING AUTHOR), UNIV MINNESOTA, DEPT SURG, 420 DELAWARE ST SE,MMC290, MINNEAPOLIS, MN 55455 USA		UNIV MINNESOTA;UNIV MINNESOTA;UNIV MINNESOTA;UNIV MINNESOTA;UNIV MINNESOTA;UNIV MINNESOTA;COLUMBIA UNIV;COLUMBIA UNIV;NATL TAIWAN UNIV HOSP;NATL TAIWAN UNIV HOSP;MT SINAI MED CTR;MIN SHENG GEN HOSP;MAYO CLIN;MAYO CLIN;SCOTTSDALE HEALTHCARE BARIATR CTR	IKRAMUDDIN S, 2013, JAMA-J AM MED ASSOC		ISI
							ANN. SURG.	ANNALS OF SURGERY	ENGLISH					653	LE R C;WELBOURN R;WERLING M;OSBORNE A;KOKKINOS A;LAURENIUS A;LÖNROTH H;FÄNDRIKS L;GHATEI M;BLOOM S;OLBERS T	10.1097/SLA.0b013e3180caa3e3	Gut hormones as mediators of appetite and weight loss after Roux-en-Y gastric bypass	1	2007	Carel W. le Roux; Richard Welbourn; Malin Werling; Alan Osborne; Alexander Kokkinos; Anna Laurenius; Hans Lönroth; Lars Fändriks; Mohammad A. Ghatei; Stephen R. Bloom; Torsten Olbers		Randomized clinical trial		LE RC, 2007, ANN. SURG.
ADULT; ARTICLE; BARIATRIC SURGERY; BODY MASS; CARDIOVASCULAR RISK; COHORT ANALYSIS; CONTROLLED CLINICAL TRIAL (TOPIC); CONTROLLED STUDY; DATA ANALYSIS; ETHNIC GROUP; FEMALE; GASTRIC BANDING; GASTROPLASTY; HUMAN; INCIDENCE; MAJOR CLINICAL STUDY; MALE; NON INSULIN DEPENDENT DIABETES MELLITUS; OBESITY; POSTOPERATIVE COMPLICATION; PRIORITY JOURNAL; PROPHYLAXIS; PROSPECTIVE STUDY; REOPERATION; RISK RE…	ADULT; ARTICLE; BARIATRIC SURGERY; BODY MASS; CARDIOVASCULAR RISK; COHORT ANALYSIS; CONTROLLED CLINICAL TRIAL (TOPIC); CONTROLLED STUDY; DATA ANALYSIS; ETHNIC GROUP; FEMALE; GASTRIC BANDING; GASTROPLASTY; HUMAN; INCIDENCE; MAJOR CLINICAL STUDY; MALE; NON INSULIN DEPENDENT DIABETES MELLITUS; OBESITY; POSTOPERATIVE COMPLICATION; PRIORITY JOURNAL; PROPHYLAXIS; PROSPECTIVE STUDY; REOPERATION; RISK RE…	INSTITUTE OF MEDICINE, SAHLGRENSKA ACADEMY, UNIVERSITY OF GOTHENBURG, GOTHENBURG, SWEDEN; INSTITUTE OF SURGERY, SAHLGRENSKA ACADEMY, UNIVERSITY OF GOTHENBURG, GOTHENBURG, SWEDEN; NORDIC SCHOOL OF PUBLIC HEALTH, GOTHENBURG, SWEDEN; DEPARTMENT OF SURGERY, UNIVERSITY HOSPITAL, ÖREBRO, SWEDEN; DEPARTMENT OF CHRONIC DISEASE PREVENTION, NATIONAL INSTITUTE FOR HEALTH AND WELFARE, HELSINKI, FINLAND; PENN…	BACKGROUND: WEIGHT LOSS PROTECTS AGAINST TYPE 2 DIABETES BUT IS HARD TO MAINTAIN WITH BEHAVIORAL MODIFICATION ALONE. IN AN ANALYSIS OF DATA FROM A NONRANDOMIZED, PROSPECTIVE, CONTROLLED STUDY, WE EXAMINED THE EFFECTS OF BARIATRIC SURGERY ON THE PREVENTION OF TYPE 2 DIABETES. METHODS: IN THIS ANALYSIS, WE INCLUDED 1658 PATIENTS WHO UNDERWENT BARIATRIC SURGERY AND 1771 OBESE MATCHED CONTROLS (WITH …			00284793	NEW ENGL. J. MED.	NEW ENGLAND JOURNAL OF MEDICINE	ENGLISH		695 – 704	MASSACHUSSETTS MEDICAL SOCIETY		653	CARLSSON L;PELTONEN M;AHLIN S;ANVEDEN ;BOUCHARD C;CARLSSON B;JACOBSON P;LÖNROTH H;MAGLIO C;NÄSLUND I;PIRAZZI C;ROMEO S;SJÖHOLM K;SJÖSTRÖM E;WEDEL H;SVENSSON P;SJÖSTRÖM L	10.1056/NEJMoa1112082	BARIATRIC SURGERY AND PREVENTION OF TYPE 2 DIABETES IN SWEDISH OBESE SUBJECTS	3	2012	CARLSSON LENA M S;PELTONEN MARKKU;AHLIN SOFIE;ANVEDEN ÅSA;BOUCHARD CLAUDE;CARLSSON BJÖRN;JACOBSON PETER;LÖNROTH HANS;MAGLIO CRISTINA;NÄSLUND INGMAR;PIRAZZI CARLO;ROMEO STEFANO;SJÖHOLM KAJSA;SJÖSTRÖM ELISABETH;WEDEL HANS;SVENSSON PER-ARNE;SJÖSTRÖM LARS	L. SJÖSTRÖM; SOS SECRETARIAT, SAHLGRENSKA UNIVERSITY HOSPITAL, S-413 45 GOTHENBURG, VITA STRÅKET 15, SWEDEN; EMAIL: LARS.V.SJOSTROM@MEDFAK.GU.SE		UNIVERSITY OF GOTHENBURG;UNIVERSITY OF GOTHENBURG;NORDIC SCHOOL OF PUBLIC HEALTH;UNIVERSITY HOSPITAL;NATIONAL INSTITUTE FOR HEALTH AND WELFARE;LOUISIANA STATE UNIVERSITY SYSTEM	CARLSSON L, 2012, NEW ENGL J MED	https://www.scopus.com/inward/record.uri?eid=2-s2.0-84865293878&doi=10.1056%2fNEJMoa1112082&partnerID=40&md5=3a845034dc8f65a6c1d81141eaec5072	SCOPUS
ADIPOSITY; ANIMALS; BODY MASS INDEX; FEMALE; FOLLOW-UP STUDIES; GASTRIC BYPASS; HUMANS; INTESTINES; MICE; MICROBIOTA; OBESITY; MUS; AMINO ACID; BILE ACID; CARBOXYLIC ACID; FATTY ACID; GENOMIC DNA; GLUCOSE; TRIACYLGLYCEROL; ADULT; ANIMAL EXPERIMENT; ARTICLE; BACTERIAL COLONIZATION; BARIATRIC SURGERY; BILE ACID METABOLISM; BODY FAT; BODY MASS; BODY WEIGHT; CLINICAL ARTICLE; CLINICAL TRIAL (TOPIC); …	ADIPOSITY; ANIMALS; BODY MASS INDEX; FEMALE; FOLLOW-UP STUDIES; GASTRIC BYPASS; HUMANS; INTESTINES; MICE; MICROBIOTA; OBESITY; MUS; AMINO ACID; BILE ACID; CARBOXYLIC ACID; FATTY ACID; GENOMIC DNA; GLUCOSE; TRIACYLGLYCEROL; ADULT; ANIMAL EXPERIMENT; ARTICLE; BACTERIAL COLONIZATION; BARIATRIC SURGERY; BILE ACID METABOLISM; BODY FAT; BODY MASS; BODY WEIGHT; CLINICAL ARTICLE; CLINICAL TRIAL (TOPIC); …	WALLENBERG LABORATORY AND SAHLGRENSKA, CENTER FOR CARDIOVASCULAR AND METABOLIC RESEARCH, DEPARTMENT OF MOLECULAR AND CLINICAL MEDICINE, INSTITUTE OF MEDICINE, UNIVERSITY OF GOTHENBURG, GOTHENBURG, SE-413 45, SWEDEN; DEPARTMENT OF BIOLOGY AND BIOLOGICAL ENGINEERING, CHALMERS UNIVERSITY OF TECHNOLOGY, GOTHENBURG, SE-412 96, SWEDEN; DEPARTMENT OF GASTROSURGICAL RESEARCH AND EDUCATION, SAHLGRENSKA AC…	BARIATRIC SURGERY IS CURRENTLY THE MOST EFFECTIVE PROCEDURE FOR THE TREATMENT OF OBESITY. GIVEN THE ROLE OF THE GUT MICROBIOTA IN REGULATING HOST METABOLISM AND ADIPOSITY, WE INVESTIGATED THE LONG-TERM EFFECTS OF BARIATRIC SURGERY ON THE MICROBIOME OF PATIENTS RANDOMIZED TO ROUX-EN-Y GASTRIC BYPASS OR VERTICAL BANDED GASTROPLASTY AND MATCHED FOR WEIGHT AND FAT MASS LOSS. THE TWO SURGICAL PROCEDUR…			15504131	CELL METAB.	CELL METABOLISM	ENGLISH		228 – 238	CELL PRESS		647	TREMAROLI V;KARLSSON F;WERLING M;STÅHLMAN M;KOVATCHEVA-DATCHARY P;OLBERS T;FÄNDRIKS L;LE R C;NIELSEN J;BÄCKHED F	10.1016/j.cmet.2015.07.009	ROUXENY GASTRIC BYPASS AND VERTICAL BANDED GASTROPLASTY INDUCE LONGTERM CHANGES ON THE HUMAN GUT MICROBIOME CONTRIBUTING TO FAT MASS REGULATION	2	2015	TREMAROLI VALENTINA;KARLSSON FREDRIK;WERLING MALIN;STÅHLMAN MARCUS;KOVATCHEVA-DATCHARY PETIA;OLBERS TORSTEN;FÄNDRIKS LARS;LE ROUX CAREL W;NIELSEN JENS;BÄCKHED FREDRIK	F. BÄCKHED; WALLENBERG LABORATORY AND SAHLGRENSKA, CENTER FOR CARDIOVASCULAR AND METABOLIC RESEARCH, DEPARTMENT OF MOLECULAR AND CLINICAL MEDICINE, INSTITUTE OF MEDICINE, UNIVERSITY OF GOTHENBURG, GOTHENBURG, SE-413 45, SWEDEN; EMAIL: FREDRIK.BACKHED@WLAB.GU.SE		UNIVERSITY OF GOTHENBURG;CHALMERS UNIVERSITY OF TECHNOLOGY;UNIVERSITY OF GOTHENBURG;UNIVERSITY COLLEGE DUBLIN;UNIVERSITY OF COPENHAGEN	TREMAROLI V, 2015, CELL METAB	https://www.scopus.com/inward/record.uri?eid=2-s2.0-84938559816&doi=10.1016%2fj.cmet.2015.07.009&partnerID=40&md5=57e977eb4a4a95b20e4d2b062b45ee53	SCOPUS
ADOLESCENT; BARIATRIC SURGERY; BODY MASS INDEX; DYSLIPIDEMIAS; FEMALE; HUMANS; HYPERTENSION; MALE; MALNUTRITION; OBESITY; MORBID; POSTOPERATIVE COMPLICATIONS; PREVALENCE; PROSPECTIVE STUDIES; QUALITY OF LIFE; REOPERATION; RISK FACTORS; WEIGHT LOSS; YOUNG ADULT; 25 HYDROXYVITAMIN D; CYANOCOBALAMIN; FERRITIN; RETINOL; ABNORMALLY HIGH SUBSTRATE CONCENTRATION IN BLOOD; ADOLESCENT OBESITY; ADULT; ARTI…	ADOLESCENT; BARIATRIC SURGERY; BODY MASS INDEX; DYSLIPIDEMIAS; FEMALE; HUMANS; HYPERTENSION; MALE; MALNUTRITION; OBESITY; MORBID; POSTOPERATIVE COMPLICATIONS; PREVALENCE; PROSPECTIVE STUDIES; QUALITY OF LIFE; REOPERATION; RISK FACTORS; WEIGHT LOSS; YOUNG ADULT; 25 HYDROXYVITAMIN D; CYANOCOBALAMIN; FERRITIN; RETINOL; ABNORMALLY HIGH SUBSTRATE CONCENTRATION IN BLOOD; ADOLESCENT; ADOLESCENT OBESITY;…	CINCINNATI CHILDREN'S HOSPITAL MEDICAL CENTER, 3333 BURNET AVE., MLC 2023, CINCINNATI, 45229-3026, OH, UNITED STATES; UNIVERSITY OF CINCINNATI, CINCINNATI, OH, UNITED STATES; NATIONWIDE CHILDREN'S HOSPITAL, COLUMBUS, OH, UNITED STATES; UNIVERSITY OF PITTSBURGH MEDICAL CENTER, PITTSBURGH, UNITED STATES; TEXAS CHILDREN'S HOSPITAL, BAYLOR COLLEGE OF MEDICINE, HOUSTON, UNITED STATES; WOMEN AND CHILDR…	BACKGROUND BARIATRIC SURGERY IS INCREASINGLY CONSIDERED FOR THE TREATMENT OF ADOLESCENTS WITH SEVERE OBESITY, BUT FEW PROSPECTIVE ADOLESCENT-SPECIFIC STUDIES EXAMINING THE EFFICACY AND SAFETY OF WEIGHT-LOSS SURGERY ARE AVAILABLE TO SUPPORT CLINICAL DECISION MAKING. METHODS WE PROSPECTIVELY ENROLLED 242 ADOLESCENTS UNDERGOING WEIGHT-LOSS SURGERY AT FIVE U.S. CENTERS. PATIENTS UNDERGOING ROUX-EN-Y …			00284793	NEW ENGL. J. MED.	NEW ENGLAND JOURNAL OF MEDICINE	ENGLISH		113 – 123	MASSACHUSSETTS MEDICAL SOCIETY		604	INGE T;COURCOULAS A;JENKINS T;MICHALSKY M;HELMRATH M;BRANDT M;HARMON C;ZELLER M;CHEN M;XANTHAKOS S;HORLICK M;BUNCHER C	10.1056/NEJMoa1506699	WEIGHT LOSS AND HEALTH STATUS 3 YEARS AFTER BARIA TRIC SURGERY IN ADOLESCENTS	1	2016	INGE THOMAS H;COURCOULAS ANITA P;JENKINS TODD M;MICHALSKY MARC P;HELMRATH MICHAEL A;BRANDT MARY L;HARMON CARROLL M;ZELLER MEG H;CHEN MIKE K;XANTHAKOS STAVRA A;HORLICK MARY;BUNCHER C RALPH			CINCINNATI CHILDREN'S HOSPITAL MEDICAL CENTER;UNIVERSITY OF CINCINNATI;NATIONWIDE CHILDREN'S HOSPITAL;UNIVERSITY OF PITTSBURGH MEDICAL CENTER;BAYLOR COLLEGE OF MEDICINE;UNIVERSITY OF BUFFALO;UNIVERSITY OF ALABAMA AT BIRMINGHAM;NATIONAL INSTITUTE OF DIABETES AND DIGESTIVE AND KIDNEY DISEASES	INGE T, 2016, NEW ENGL J MED	https://www.scopus.com/inward/record.uri?eid=2-s2.0-84954288107&doi=10.1056%2fNEJMoa1506699&partnerID=40&md5=8002ba1daf0c721b70058365aa8825a8	SCOPUS
GLUCAGON-LIKE PEPTIDE-1; LOW-CALORIE DIET; BODY-MASS INDEX; BARIATRIC; SURGERY; ILEAL TRANSPOSITION; GLP-1 SECRETION; PLASMA-GLUCOSE; OBESE-PATIENTS; CELL FUNCTION; INSULIN	GLUCAGON-LIKE PEPTIDE-1; LOW-CALORIE DIET; BODY-MASS INDEX; BARIATRIC; SURGERY; ILEAL TRANSPOSITION; GLP-1 SECRETION; PLASMA-GLUCOSE; OBESE-PATIENTS; CELL FUNCTION; INSULIN	LAFERRÈRE, B (CORRESPONDING AUTHOR), ST LUKES ROOSEVELT HOSP, OBES RES CTR, 1111 AMSTERDAM AVE,ROOM 1020 BABCOCK, NEW YORK, NY 10025 USA.; LAFERRERE, BLANDINE; TRAN, HAO; EGGER, JOSEPH R.; COLARUSSO, ANTONIA; KOVACK, BETTY; BAWA, BAANI; YAPP, KIMBERLY; OLIVAN, BLANCA, COLUMBIA UNIV, COLL PHYS \& SURG, OBES RES CTR, ST LUKES ROOSEVELT HOSP CTR, NEW YORK, NY 10025 USA.; TEIXEIRA, JULIO; MCGINTY, JA…	CONTEXT: GASTRIC BYPASS SURGERY (GBP) RESULTS IN RAPID WEIGHT LOSS, IMPROVEMENT OF TYPE 2 DIABETES (T2DM), AND INCREASE IN INCRETINS LEVELS. DIET-INDUCED WEIGHT LOSS ALSO IMPROVES T2DM AND MAY INCREASE INCRETIN LEVELS. OBJECTIVE: OUR OBJECTIVE WAS TO DETERMINE WHETHER THE MAGNITUDE OF THE CHANGE OF THE INCRETIN LEVELS AND EFFECT IS GREATER AFTER GBP COMPARED WITH A LOW CALORIC DIET, AFTER EQUIVAL…	2055 L ST NW, SUITE 600, WASHINGTON, DC 20036 USA	COLUMBIA UNIVERSITY; MOUNT SINAI WEST; MOUNT SINAI ST. LUKE'S; MOUNT SINAI WEST; MOUNT SINAI ST. LUKE'S; COLUMBIA UNIVERSITY	0021-972X	J. CLIN. ENDOCRINOL. METAB.	JOURNAL OF CLINICAL ENDOCRINOLOGY \& METABOLISM	ENGLISH		2479-2485	ENDOCRINE SOC	ENDOCRINOLOGY \& METABOLISM	601	LAFERRERE B;TEIXEIRA J;MCGINTY J;TRAN H;EGGER J;COLARUSSO A;KOVACK B;BAWA ;BAANI B;KOSHY N;LEE H;YAPP K;OLIVAN ;BLANCA B	10.1210/jc.2007-2851	EFFECT OF WEIGHT LOSS BY GASTRIC BYPASS SURGERY VERSUS HYPOCALORIC DIET ON GLUCOSE AND INCRETIN LEVELS IN PATIENTS WITH TYPE 2 DIABETES	1	2008	LAFERRERE BLANDINE;TEIXEIRA JULIO;MCGINTY JAMES;TRAN HAO;EGGER JOSEPH R;COLARUSSO ANTONIA;KOVACK BETTY;BAWA; BAANI;KOSHY NINAN;LEE HONGCHAN;YAPP KIMBERLY;OLIVAN; BLANCA	LAFERRÈRE, B (CORRESPONDING AUTHOR), ST LUKES ROOSEVELT HOSP, OBES RES CTR, 1111 AMSTERDAM AVE,ROOM 1020 BABCOCK, NEW YORK, NY 10025 USA		OBES RES CTR;COLUMBIA UNIV;COLUMBIA UNIV	LAFERRERE B, 2008, J CLIN ENDOCRINOL METAB		ISI
							ANN. SURG.	ANNALS OF SURGERY	ENGLISH					567	RUBINO F;GAGNER M;GENTILESCHI P;KINI S;FUKUYAMA S;FENG J;DIAMOND E	10.1097/01.sla.0000133117.12646.48	The Early Effect of the Roux-en-Y Gastric Bypass on Hormones Involved in Body Weight Regulation and Glucose Metabolism	1	2004	RUBINO F;GAGNER M;GENTILESCHI P;KINI S;FUKUYAMA S;FENG J;DIAMOND E	RUBINO F;GAGNER M;GENTILESCHI P;KINI S;FUKUYAMA S;FENG J;DIAMOND E	Randomized clinical trial;	RUBINO F, 2004	RUBINO F, 2004, ANNALS OF SURGERY
ADULT; BLOOD GLUCOSE; BODY MASS INDEX; COHORT STUDIES; FEMALE; GASTRECTOMY; GASTRIC BYPASS; GHRELIN; GLUCAGON-LIKE PEPTIDE 1; HUMANS; INSULIN; LAPAROSCOPY; MALE; MIDDLE AGED; OBESITY; MORBID; YOUNG ADULT; GLUCAGON LIKE PEPTIDE 1; GLUCOSE; ARTICLE; BARIATRIC SURGERY; BLOOD SAMPLING; BODY MASS; BODY WEIGHT; CLINICAL ARTICLE; CLINICAL EVALUATION; CLINICAL TRIAL; CONCENTRATION RESPONSE; CONTROLLED CL…	ADULT; BLOOD GLUCOSE; BODY MASS INDEX; COHORT STUDIES; FEMALE; GASTRECTOMY; GASTRIC BYPASS; GHRELIN; GLUCAGON-LIKE PEPTIDE 1; HUMANS; INSULIN; LAPAROSCOPY; MALE; MIDDLE AGED; OBESITY; MORBID; YOUNG ADULT; GHRELIN; GLUCAGON LIKE PEPTIDE 1; GLUCOSE; INSULIN; GHRELIN; GLUCAGON LIKE PEPTIDE 1; INSULIN; ADULT; ARTICLE; BARIATRIC SURGERY; BLOOD SAMPLING; BODY MASS; BODY WEIGHT; CLINICAL ARTICLE; CLINIC…	DEPARTMENT OF SURGERY, ST. CLARASPITAL, BASEL, SWITZERLAND; DEPARTMENT OF SURGERY, UNIVERSITY HOSPITAL, BASEL, SWITZERLAND; DEPARTMENT OF MEDICINE, ST. CLARASPITAL, BASEL, SWITZERLAND; DEPARTMENT OF CLINICAL PHARMACOLOGY, UNIVERSITY HOSPITAL, BASEL, SWITZERLAND; DEPARTMENT OF RESEARCH, CLINICAL RESEARCH CENTER, UNIVERSITY HOSPITAL, BASEL, SWITZERLAND; DEPARTMENT OF GASTROENTEROLOGY, UNIVERSITY HO…	BACKGROUND: THE EXCLUSION OF THE PROXIMAL SMALL INTESTINE IS THOUGHT TO PLAY A MAJOR ROLE IN THE RAPID IMPROVEMENT IN THE METABOLIC CONTROL OF DIABETES AFTER GASTRIC BYPASS. OBJECTIVE: IN THIS RANDOMIZED, PROSPECTIVE, PARALLEL GROUP STUDY, WE SOUGHT TO EVALUATE AND COMPARE THE EFFECTS OF LAPAROSCOPIC ROUX-EN-Y GASTRIC BYPASS (LRYGB) WITH THOSE OF LAPAROSCOPIC SLEEVE GASTRECTOMY (LSG) ON FASTING, …			15281140	ANN. SURG.	ANNALS OF SURGERY	ENGLISH		234 – 241			528	PETERLI R;WÖLNERHANSSEN B;PETERS T;DEVAUX N;KERN B;CHRISTOFFEL-COURTIN C;DREWE J;VON F M;BEGLINGER C	10.1097/SLA.0b013e3181ae32e3	IMPROVEMENT IN GLUCOSE METABOLISM AFTER BARIATRIC SURGERY: COMPARISON OF LAPAROSCOPIC ROUXENY GASTRIC BYPASS AND LAPAROSCOPIC SLEEVE GASTRECTOMY: A PROSPECTIVE RANDOMIZED TRIAL	2	2009	PETERLI RALPH;WÖLNERHANSSEN BETTINA;PETERS THOMAS;DEVAUX NOÉMIE;KERN BEATRICE;CHRISTOFFEL-COURTIN CAROLINE;DREWE JUERGEN;VON FLÜE MARKUS;BEGLINGER CHRISTOPH	R. PETERLI; DEPARTMENT OF SURGERY, ST. CLARASPITAL, CH-4016 BASEL, SWITZERLAND; EMAIL: RALPH.PETERLI@CLARASPITAL.CH		UNIVERSITY HOSPITAL;UNIVERSITY HOSPITAL;UNIVERSITY HOSPITAL;UNIVERSITY HOSPITAL	PETERLI R, 2009, ANN SURG	https://www.scopus.com/inward/record.uri?eid=2-s2.0-68949094297&doi=10.1097%2fSLA.0b013e3181ae32e3&partnerID=40&md5=183df395a24417f916be4ac4887569c6	SCOPUS
CHOLECYSTOKININ (CCK); GHRELIN; GLUCAGON-LIKE PEPTIDE 1 (GLP-1); GLYCEMIC CONTROL; GUT HORMONES; LAPAROSCOPIC; LAPAROSCOPIC SLEEVE GASTRECTOMY; METABOLIC SURGERY; PEPTIDE YY (PYY); ROUX-EN-Y GASTRIC BYPASS; ADULT; BLOOD GLUCOSE; CHOLECYSTOKININ; FEMALE; GASTRIC BYPASS; GASTROINTESTINAL HORMONES; GASTROPLASTY; GLUCAGON-LIKE PEPTIDE 1; HEMOGLOBIN A; GLYCOSYLATED; HUMANS; LAPAROSCOPY; MALE; OBESITY;…	ADULT; BLOOD GLUCOSE; CHOLECYSTOKININ; FEMALE; GASTRIC BYPASS; GASTROINTESTINAL HORMONES; GASTROPLASTY; GHRELIN; GLUCAGON-LIKE PEPTIDE 1; HEMOGLOBIN A; GLYCOSYLATED; HUMANS; LAPAROSCOPY; MALE; OBESITY; MORBID; PEPTIDE YY; POSTPRANDIAL PERIOD; PROSPECTIVE STUDIES; WEIGHT LOSS; CHOLECYSTOKININ; GHRELIN; GLUCAGON LIKE PEPTIDE 1; GLUCOSE; INSULIN; PEPTIDE YY; ADULT; ANALYTICAL PARAMETERS; AREA UNDER …	DEPARTMENT OF SURGERY, ST. CLARASPITAL, 4016 BASEL, SWITZERLAND; CLINICAL RESEARCH CENTER, DEPARTMENT OF BIOMEDICINE, UNIVERSITY HOSPITAL, 4031 BASEL, SWITZERLAND; DEPARTMENT OF SURGERY, UNIVERSITY HOSPITAL, 4031 BASEL, SWITZERLAND; DEPARTMENT OF MEDICINE, ST. CLARASPITAL, 4016 BASEL, SWITZERLAND; DEPARTMENT OF GASTROENTEROLOGY, UNIVERSITY HOSPITAL, 4031 BASEL, SWITZERLAND	BACKGROUND: THE MECHANISMS OF AMELIORATION OF GLYCEMIC CONTROL EARLY AFTER LAPAROSCOPIC ROUX-EN-Y GASTRIC BYPASS (LRYGB) OR LAPAROSCOPIC SLEEVE GASTRECTOMY (LSG) ARE NOT FULLY UNDERSTOOD. METHODS: IN THIS PROSPECTIVE, RANDOMIZED 1-YEAR TRIAL, OUTCOMES OF LRYGB AND LSG PATIENTS WERE COMPARED, FOCUSING ON POSSIBLY RESPONSIBLE MECHANISMS. TWELVE PATIENTS WERE RANDOMIZED TO LRYGB AND 11 TO LSG. THESE…			17080428	OBES. SURG.	OBESITY SURGERY	ENGLISH		740 – 748			443	PETERLI R;STEINERT R;WOELNERHANSSEN B;PETERS T;CHRISTOFFEL-COURTIN C;GASS M;KERN B;VON F M;BEGLINGER C	10.1007/s11695-012-0622-3	METABOLIC AND HORMONAL CHANGES AFTER LAPAROSCOPIC ROUXENY GASTRIC BYPASS AND SLEEVE GASTRECTOMY: A RANDOMIZED PROSPECTIVE TRIAL	2	2012	PETERLI RALPH;STEINERT ROBERT E;WOELNERHANSSEN BETTINA;PETERS THOMAS;CHRISTOFFEL-COURTIN CAROLINE;GASS MARKUS;KERN BEATRICE;VON FLUEE MARKUS;BEGLINGER CHRISTOPH	R. PETERLI; DEPARTMENT OF SURGERY, ST. CLARASPITAL, 4016 BASEL, SWITZERLAND; EMAIL: RALPH.PETERLI@CLARASPITAL.CH	Cholecystokinin (CCK); Ghrelin; Glucagon-like peptide 1 (GLP-1); Glycemic control; Gut hormones; Laparoscopic; Laparoscopic sleeve gastrectomy; Metabolic surgery; Peptide YY (PYY); Roux-en-Y gastric bypass	UNIVERSITY HOSPITAL;UNIVERSITY HOSPITAL;UNIVERSITY HOSPITAL	PETERLI R, 2012, OBES SURG	https://www.scopus.com/inward/record.uri?eid=2-s2.0-84862661746&doi=10.1007%2fs11695-012-0622-3&partnerID=40&md5=383ff963ab5759d926d6b42f141f0434	SCOPUS
QUALITY-OF-LIFE; GASTROPLASTY; CARCINOMA; MORTALITY; OUTCOMES; DISEASE	QUALITY-OF-LIFE; GASTROPLASTY; CARCINOMA; MORTALITY; OUTCOMES; DISEASE	EN CHU KONG HOSP, DEPT SURG, 399 FUHSING RD, TAIPEI 237, TAIWAN.; EN CHU KONG HOSP, DEPT SURG, TAIPEI 237, TAIWAN.; NATL TAIWAN UNIV, SCH NURSING, TAIPEI, TAIWAN.	OBJECTIVES: THIS PROSPECTIVE, RANDOMIZED TRIAL COMPARED THE SAFETY AND EFFECTIVENESS OF LAPAROSCOPIC ROUX-EN-Y GASTRIC BYPASS (LRYGBP) AND LAPAROSCOPIC MINI-GASTRIC BYPASS (LMGBP) IN THE TREATMENT OF MORBID OBESITY. SUMMARY BACKGROUND DATA: LRYGBP HAS BEEN THE GOLD STANDARD FOR THE TREATMENT OF MORBID OBESITY. WHILE LMGBP HAS BEEN REPORTED TO BE A SIMPLE AND EFFECTIVE TREATMENT, DATA FROM A RANDO…	TWO COMMERCE SQ, 2001 MARKET ST, PHILADELPHIA, PA 19103 USA	NATIONAL TAIWAN UNIVERSITY	0003-4932	ANN. SURG.	ANNALS OF SURGERY	ENGLISH	YU, PO-JUI/0000-0002-7946-8751	20-28	LIPPINCOTT WILLIAMS \& WILKINS	SURGERY	433	LEE W;YU P;WANG W;CHEN T;WEI P;HUANG M	10.1097/01.sla.0000167762.46568.98	LAPAROSCOPIC ROUXENY VERSUS MINIGASTRIC BYPASS FOR THE TREATMENT OF MORBID OBESITY A PROSPECTIVE RANDOMIZED CONTROLLED CLINICAL TRIAL	2	2005	LEE WJ;YU PJ;WANG W;CHEN TC;WEI PL;HUANG MT	EN CHU KONG HOSP, DEPT SURG, 399 FUHSING RD, TAIPEI 237, TAIWAN		EN CHU KONG HOSP;EN CHU KONG HOSP;NATL TAIWAN UNIV	LEE W, 2005, ANN SURG		ISI
GASTRIC BYPASS; MORBID-OBESITY; WEIGHT-LOSS; BAND	GASTRIC BYPASS; MORBID-OBESITY; WEIGHT-LOSS; BAND	WORDSWORTH, S (CORRESPONDING AUTHOR), UNIV OXFORD, HLTH ECON RES CTR, NUFFIELD DEPT POPULAT HLTH, OXFORD, ENGLAND.; WORDSWORTH, S (CORRESPONDING AUTHOR), UNIV OXFORD, OXFORD NATL INST HLTH RES, BIOMED RES CTR, OXFORD, ENGLAND.; FERMONT, JILLES M., UNIV CAMBRIDGE, DEPT MED, EXPT MED \& IMMUNOTHERAPEUT, CAMBRIDGE, ENGLAND.; FERMONT, JILLES M., UNIV CAMBRIDGE, DEPT PUBL HLTH \& PRIMARY CARE, CARDIOV…	BARIATRIC SURGERY IS CONSIDERED AN EFFECTIVE TREATMENT FOR INDIVIDUALS WITH SEVERE AND COMPLEX OBESITY. BESIDES REDUCING WEIGHT AND IMPROVING OBESITY RELATED COMORBIDITIES SUCH AS DIABETES, BARIATRIC SURGERY COULD IMPROVE PATIENTS' HEALTH-RELATED QUALITY OF LIFE. HOWEVER, THE FREQUENTLY USED INSTRUMENT TO MEASURE QUALITY OF LIFE, THE EQ-5D HAS NOT BEEN VALIDATED FOR USE IN BARIATRIC SURGERY, WHIC…	1160 BATTERY STREET, STE 100, SAN FRANCISCO, CA 94111 USA	UNIVERSITY OF CAMBRIDGE; UNIVERSITY OF CAMBRIDGE; UNIVERSITY OF BRISTOL; UNIVERSITY OF BRISTOL; UNIVERSITY OF OXFORD; UNIVERSITY OF OXFORD	1932-6203	PLOS ONE	PLOS ONE	ENGLISH	WORDSWORTH, SARAH/0000-0002-2361-3040 BYRNE, JAMES/0000-0003-3517-5110 BLAZEBY, JANE/0000-0002-3354-3330 FERMONT, JILLES/0000-0001-5042-5785		PUBLIC LIBRARY SCIENCE	SCIENCE \& TECHNOLOGY - OTHER TOPICS	407	FERMONT J;BLAZEBY J;ROGERS C;WORDSWORTH S;BY-BAND-SLEEVE S M G B	10.1371/journal.pone.0189190	THE EQ5D5L IS A VALID APPROACH TO MEASURE HEALTH RELATED QUALITY OF LIFE IN PATIENTS UNDERGOING BARIATRIC SURGERY	1	2017	FERMONT JILLES M;BLAZEBY JANE M;ROGERS CHRIS A; WORDSWORTH SARAH;BY-BAND-SLEEVE STUDY MANAGEMENT GR	WORDSWORTH, S (CORRESPONDING AUTHOR), UNIV OXFORD, HLTH ECON RES CTR, NUFFIELD DEPT POPULAT HLTH, OXFORD, ENGLAND		UNIV OXFORD;UNIV OXFORD;UNIV CAMBRIDGE;UNIV CAMBRIDGE;UNIV BRISTOL;UNIV HOSP BRISTOL NATL HLTH SERV FDN TRUST;UNIV BRISTOL;UNIV OXFORD;UNIV OXFORD	FERMONT J, 2017, PLOS ONE		ISI
ROUX-EN-Y; BETA-CELL FUNCTION; BARIATRIC SURGERY; INSULIN-RESISTANCE; MORBIDLY OBESE; GUT HORMONE; WEIGHT-LOSS; GLUCOSE; HOMEOSTASIS; MECHANISM	ROUX-EN-Y; BETA-CELL FUNCTION; BARIATRIC SURGERY; INSULIN-RESISTANCE; MORBIDLY OBESE; GUT HORMONE; WEIGHT-LOSS; GLUCOSE; HOMEOSTASIS; MECHANISM	CHUANG, LM (CORRESPONDING AUTHOR), NATL TAIWAN UNIV, CTR DIABET, MIN SHENG GEN HOSP, 168 JINGGUO RD, TAO YUAN 330, TAOYUAN COUNTY, TAIWAN.; CHONG, KEONG; TSAI, MING-HAN; CHUANG, LEE-MING, NATL TAIWAN UNIV, CTR DIABET, MIN SHENG GEN HOSP, TAO YUAN 330, TAOYUAN COUNTY, TAIWAN.; LEE, WEI-JEI; SER, KONG-HAN; LEE, YI-CHIH; CHEN, JUNG-CHIEN, NATL TAIWAN UNIV, CTR DIABET, DEPT SURG, TAO YUAN 330, TAOYUA…	OBJECTIVES: TO DETERMINE THE EFFICACIES OF 2 WEIGHT-REDUCING OPERATIONS ON DIABETIC CONTROL AND THE ROLE OF DUODENUM EXCLUSION. DESIGN: DOUBLE-BLIND RANDOMIZED CONTROLLED TRIAL. SETTING: DEPARTMENT OF SURGERY OF THE MIN-SHENG GENERAL HOSPITAL, NATIONAL TAIWAN UNIVERSITY. PATIENTS: WESTUDIED 60 MODERATELY OBESE PATIENTS (BODY MASS INDEX > 25 AND < 35) AGED > 30 TO < 60 YEARS WHO HAD POORLY CONTROL…	330 N WABASH AVE, STE 39300, CHICAGO, IL 60611-5885 USA	NATIONAL TAIWAN UNIVERSITY; NATIONAL TAIWAN UNIVERSITY; NATIONAL TAIWAN UNIVERSITY	0004-0010	ARCH. SURG.	ARCHIVES OF SURGERY	ENGLISH	CHUANG, LEE-MING/0000-0003-0978-2662 CHEN, JUNG-CHIEN/0000-0001-8634-1145	143-148	AMER MEDICAL ASSOC	SURGERY	403	LEE W;CHONG K;SER K;LEE Y;CHEN S;CHEN J;TSAI M;CHUANG ;LEE-MING L	10.1001/archsurg.2010.326	GASTRIC BYPASS VS SLEEVE GASTRECTOMY FOR TYPE 2 DIABETES MELLITUS A RANDOMIZED CONTROLLED TRIAL	2	2011	LEE WEI-JEI;CHONG KEONG;SER KONG-HAN;LEE YI-CHIH; CHEN SHU-CHUN;CHEN JUNG-CHIEN;TSAI MING-HAN;CHUANG; LEE-MING	CHUANG, LM (CORRESPONDING AUTHOR), NATL TAIWAN UNIV, CTR DIABET, MIN SHENG GEN HOSP, 168 JINGGUO RD, TAO YUAN 330, TAOYUAN COUNTY, TAIWAN		NATL TAIWAN UNIV;NATL TAIWAN UNIV;NATL TAIWAN UNIV;NATL TAIWAN UNIV	LEE W, 2011, ARCH SURG		ISI
ADULT; ANASTOMOSIS; ROUX-EN-Y; SURGICAL; BODY MASS INDEX; DIARRHEA; FEMALE; FRANCE; GASTRIC BYPASS; HUMANS; MALE; METABOLISM; MIDDLE AGED; OBESITY; MORBID; PROSPECTIVE STUDIES; STEATORRHEA; TREATMENT OUTCOME; WEIGHT LOSS; BODY MASS; BODY WEIGHT LOSS; CLINICAL TRIAL; COMPARATIVE STUDY; CONTROLLED STUDY; EPIDEMIOLOGY; GASTRIC BYPASS SURGERY; HUMAN; MORBID OBESITY; MULTICENTER STUDY; PHYSIOLOGY; PRO…	ADULT; ANASTOMOSIS; ROUX-EN-Y; ANASTOMOSIS; SURGICAL; BODY MASS INDEX; DIARRHEA; FEMALE; FRANCE; GASTRIC BYPASS; HUMANS; MALE; METABOLISM; MIDDLE AGED; OBESITY; MORBID; PROSPECTIVE STUDIES; STEATORRHEA; TREATMENT OUTCOME; WEIGHT LOSS; ADULT; ANASTOMOSIS; BODY MASS; BODY WEIGHT LOSS; CLINICAL TRIAL; COMPARATIVE STUDY; CONTROLLED STUDY; DIARRHEA; EPIDEMIOLOGY; FEMALE; FRANCE; GASTRIC BYPASS SURGERY…	DEPARTMENT OF DIGESTIVE AND BARIATRIC SURGERY, HOSPICES CIVILS DE LYON, HÔPITAL EDOUARD HERRIOT, LYON, FRANCE; HÔPITAL PRIVÉ DE LA LOIRE, SAINT-ÉTIENNE, FRANCE; CARMEN LABORATORY, UNIVERSITÉ CLAUDE BERNARD LYON 1, INSERM 1060, LYON, FRANCE; GENERAL AND ENDOCRINE SURGERY DEPARTMENT, HURIEZ HOSPITAL, LILLE, FRANCE; EUROPEAN GENOMIC INSTITUTE FOR DIABETES, LILLE UNIVERSITY, INSERM LILLE, LILLE, FRAN…	BACKGROUND: ONE ANASTOMOSIS GASTRIC BYPASS (OAGB) IS INCREASINGLY USED IN THE TREATMENT OF MORBID OBESITY. HOWEVER, THE EFFICACY AND SAFETY OUTCOMES OF THIS PROCEDURE REMAIN DEBATED. WE REPORT THE RESULTS OF A RANDOMISED TRIAL (YOMEGA) COMPARING THE OUTCOMES OF OAGB VERSUS STANDARD ROUX-EN-Y GASTRIC BYPASS (RYGB). METHODS: THIS PROSPECTIVE, MULTICENTRE, RANDOMISED NON-INFERIORITY TRIAL, WAS HELD …			01406736	LANCET	THE LANCET	ENGLISH		1299 – 1309	LANCET PUBLISHING GROUP		348	ROBERT M;ESPALIEU P;PELASCINI E;CAIAZZO R;STERKERS A;KHAMPHOMMALA L;POGHOSYAN T;CHEVALLIER J;MALHERBE V;CHOUILLARD E;RECHE F;TORCIVIA A;MAUCORT-BOULCH D;BIN-DOREL S;LANGLOIS-JACQUES C;DELAUNAY D;PATTOU F;DISSE E	10.1016/S0140-6736(19)30475-1	EFFICACY AND SAFETY OF ONE ANASTOMOSIS GASTRIC BYPASS VERSUS ROUXENY GASTRIC BYPASS FOR OBESITY (YOMEGA): A MULTICENTRE RANDOMISED OPENLABEL NONINFERIORITY TRIAL	1	2019	ROBERT MAUD;ESPALIEU PHILIPPE;PELASCINI ELISE;CAIAZZO ROBERT;STERKERS ADRIEN;KHAMPHOMMALA LITA;POGHOSYAN TIGRAN;CHEVALLIER JEAN-MARC;MALHERBE VINCENT;CHOUILLARD ELIE;RECHE FABIAN;TORCIVIA ADRIANA;MAUCORT-BOULCH DELPHINE;BIN-DOREL SYLVIE;LANGLOIS-JACQUES CAROLE;DELAUNAY DOMINIQUE;PATTOU FRANÇOIS;DISSE EMMANUEL	M. ROBERT; DEPARTMENT OF DIGESTIVE AND BARIATRIC SURGERY, HOSPICES CIVILS DE LYON, HÔPITAL EDOUARD HERRIOT, LYON, 69437, FRANCE; EMAIL: MAUD.ROBERT@CHU-LYON.FR		HOSPICES CIVILS DE LYON;CARMEN LABORATORY;HURIEZ HOSPITAL;LILLE UNIVERSITY;CENTRE HOSPITALIER PRIVÉ SAINT GRÉGOIRE;CENTRE HOSPITALIER INTERCOMMUNAL POISSY/SAINT-GERMAIN-EN-LAYE;CENTRE HOSPITALIER LYON SUD;CENTRE HOSPITALIER LYON SUD;HOSPICES CIVILS DE LYON	ROBERT M, 2019, LANCET	https://www.scopus.com/inward/record.uri?eid=2-s2.0-85063339804&doi=10.1016%2fS0140-6736%2819%2930475-1&partnerID=40&md5=912c813b4f7a89e85bddfde71abd5d22	SCOPUS
ADULT; AMINO ACIDS; BRANCHED-CHAIN; CARNITINE; COHORT STUDIES; DIABETES MELLITUS; TYPE 2; FEMALE; GASTRIC BYPASS; HUMANS; MALE; METABOLIC NETWORKS AND PATHWAYS; MIDDLE AGED; OBESITY; PRINCIPAL COMPONENT ANALYSIS; REGRESSION ANALYSIS; WEIGHT LOSS; ACYLCARNITINE; BRANCHED CHAIN AMINO ACID; C PEPTIDE; PROINSULIN; DRUG DERIVATIVE; AMINO ACID BLOOD LEVEL; ARTICLE; CLINICAL ARTICLE; CONTROLLED STUDY; D…	ADULT; AMINO ACIDS; BRANCHED-CHAIN; CARNITINE; COHORT STUDIES; DIABETES MELLITUS; TYPE 2; FEMALE; GASTRIC BYPASS; HUMANS; MALE; METABOLIC NETWORKS AND PATHWAYS; MIDDLE AGED; OBESITY; PRINCIPAL COMPONENT ANALYSIS; REGRESSION ANALYSIS; WEIGHT LOSS; ACYLCARNITINE; BRANCHED CHAIN AMINO ACID; C PEPTIDE; PROINSULIN; ACYLCARNITINE; BRANCHED CHAIN AMINO ACID; CARNITINE; DRUG DERIVATIVE; ADULT; AMINO ACID…	NEW YORK OBESITY NUTRITION RESEARCH CENTER, ST. LUKE'S ROOSEVELT HOSPITAL CENTER, NEW YORK, NY 10025, UNITED STATES; COLUMBIA UNIVERSITY COLLEGE OF PHYSICIANS AND SURGEONS, NEW YORK, NY 10032, UNITED STATES; DEPARTMENT OF BIOSTATISTICS, COLUMBIA UNIVERSITY, NEW YORK, NY 10032, UNITED STATES; DIVISION OF MINIMALLY INVASIVE SURGERY, ST. LUKE'S ROOSEVELT HOSPITAL CENTER, NEW YORK, NY 10025, UNITED S…	GLYCEMIC CONTROL IS IMPROVED MORE AFTER GASTRIC BYPASS SURGERY (GBP) THAN AFTER EQUIVALENT DIET-INDUCED WEIGHT LOSS IN PATIENTS WITH MORBID OBESITY AND TYPE 2 DIABETES MELLITUS. WE APPLIED METABOLOMIC PROFILING TO UNDERSTAND THE MECHANISMS OF THIS BETTER METABOLIC RESPONSE AFTER GBP. CIRCULATING AMINO ACIDS (AAS) AND ACYLCARNITINES (ACS) WERE MEASURED IN PLASMA FROM FASTED SUBJECTS BY TARGETED TA…			19466242	SCI. TRANSL. MED.	SCIENCE TRANSLATIONAL MEDICINE	ENGLISH					333	LAFERRÈRE B;REILLY D;ARIAS S;SWERDLOW N;GORROOCHURN P;BAWA B;BOSE M;TEIXEIRA J;STEVENS R;WENNER B;BAIN J;MUEHLBAUER M;HAQQ A;LIEN L;SHAH S;SVETKEY L;NEWGARD C	10.1126/scitranslmed.3002043	DIFFERENTIAL METABOLIC IMPACT OF GASTRIC BYPASS SURGERY VERSUS DIETARY INTERVENTION IN OBESE DIABETIC SUBJECTS DESPITE IDENTICAL WEIGHT LOSS	1	2011	LAFERRÈRE BLANDINE;REILLY DAVID;ARIAS SARA;SWERDLOW NICHOLAS;GORROOCHURN PRAKASH;BAWA BAANI;BOSE MOUSUMI;TEIXEIRA JULIO;STEVENS ROBERT D;WENNER BRETT R;BAIN JAMES R;MUEHLBAUER MICHAEL J;HAQQ ANDREA;LIEN LILLIAN;SHAH SVATI H;SVETKEY LAURA P;NEWGARD CHRISTOPHER B	B. LAFERRÈRE; NEW YORK OBESITY NUTRITION RESEARCH CENTER, ST. LUKE'S ROOSEVELT HOSPITAL CENTER, NEW YORK, NY 10025, UNITED STATES; EMAIL: BBL14@COLUMBIA.EDU		NEW YORK OBESITY NUTRITION RESEARCH CENTER;COLUMBIA UNIVERSITY COLLEGE OF PHYSICIANS AND SURGEONS;COLUMBIA UNIVERSITY;ST. LUKE'S ROOSEVELT HOSPITAL CENTER;DUKE UNIVERSITY MEDICAL CENTER;DUKE UNIVERSITY MEDICAL CENTER;DUKE UNIVERSITY MEDICAL CENTER;UNIVERSITY OF ALBERTA	LAFERRÈRE B, 2011, SCI TRANSL MED	https://www.scopus.com/inward/record.uri?eid=2-s2.0-79955387227&doi=10.1126%2fscitranslmed.3002043&partnerID=40&md5=d31969ced553ac57d44b16ad15c710db	SCOPUS
INTENSIVE MEDICAL THERAPY; BLOOD-PRESSURE CONTROL; Y GASTRIC BYPASS; METABOLIC SURGERY; CARDIOVASCULAR OUTCOMES; RESISTANT HYPERTENSION; WEIGHT-LOSS; ASSOCIATION; HEALTH; OVERWEIGHT	INTENSIVE MEDICAL THERAPY; BLOOD-PRESSURE CONTROL; Y GASTRIC BYPASS; METABOLIC SURGERY; CARDIOVASCULAR OUTCOMES; RESISTANT HYPERTENSION; WEIGHT-LOSS; ASSOCIATION; HEALTH; OVERWEIGHT	SCHIAVON, CA (CORRESPONDING AUTHOR), HEART HOSP HCOR, RES INST, ABILIO SOARES ST 250,12TH FLOOR, BR-04004050 SAO PAULO, SP, BRAZIL.; SCHIAVON, CARLOS A.; IKEOKA, DIMAS; SANTUCCI, ELIANA, V; SANTOS, RENATO NAKAGAWA; DAMIANI, LUCAS P.; OLIVEIRA, JULIANA D.; MACHADO, RACHEL HELENA, V; HALPERN, HELIO; MONTEIRO, FREDERICO L. J.; NOUJAIM, PATRICIA M.; CAVALCANTI, ALEXANDRE B., HEART HOSP HCOR, RES INST…	BACKGROUND: MIDTERM EFFECTS OF BARIATRIC SURGERY ON PATIENTS WITH OBESITY AND HYPERTENSION REMAIN UNCERTAIN. OBJECTIVE: TO DETERMINE THE 3-YEAR EFFECTS OF ROUX-EN-Y GASTRIC BYPASS (RYGB) ON BLOOD PRESSURE (BP) COMPARED WITH MEDICAL THERAPY (MT) ALONE. DESIGN: RANDOMIZED CLINICAL TRIAL. (CLINICALTRIALS.GOV: NCT01784848) SETTING: INVESTIGATOR-INITIATED STUDY AT HEART HOSPITAL (HCOR), SAO PAULO, BRA…	INDEPENDENCE MALL WEST 6TH AND RACE ST, PHILADELPHIA, PA 19106-1572, UNITED STATES	HOSPITAL DO CORACAO - HCOR; HARVARD UNIVERSITY; HARVARD MEDICAL SCHOOL; HARVARD UNIVERSITY MEDICAL AFFILIATES; BRIGHAM \& WOMEN'S HOSPITAL; INSTITUTO DANTE PAZZANESE DE CARDIOLOGIA; UNIVERSIDADE FEDERAL DE SAO PAULO (UNIFESP); UNIVERSIDADE DE SAO PAULO; HOSPITAL ISRAELITA ALBERT EINSTEIN; UNIVERSIDADE DE SAO PAULO	0003-4819	ANN. INTERN. MED.	ANNALS OF INTERNAL MEDICINE	ENGLISH	SCHIAVON, CARLOS/0000-0003-0798-3997 DRAGER, LUCIANO/0000-0002-2081-6846 BORTOLOTTO, LUIZ/0000-0002-4865-6442 IKEOKA, DIMAS/0000-0002-8776-9650 GONCALVES DE SOUSA, MARCIO/0000-0001-5460-5476 PETRI DAMIANI, LUCAS/0000-0002-5836-3379 BERWANGER, OTAVIO/0000-0002-4972-2958 BHATT, DEEPAK L./0000-0002-1278-6245	685+	AMER COLL PHYSICIANS	GENERAL \& INTERNAL MEDICINE	322	SCHIAVON C;BHATT D;IKEOKA D;SANTUCCI ;V E;SANTOS R;DAMIANI L;OLIVEIRA J;MACHADO R;HALPERN H;MONTEIRO F;NOUJAIM P;COHEN ;RICARDO R;DE S M;AMODEO C;BORTOLOTTO L;A. A;BERWANGER O;CAVALCANTI A;DRAGER ;LUCIANO F L	10.1001/jamasurg.2015.1534	THREEYEAR OUTCOMES OF BARIATRIC SURGERY IN PATIENTS WITH OBESITY AND HYPERTENSION A RANDOMIZED CLINICAL TRIAL	1	2020	SCHIAVON CARLOS A;BHATT DEEPAK L;IKEOKA DIMAS;SANTUCCI; V ELIANA;SANTOS RENATO NAKAGAWA;DAMIANI LUCAS P; OLIVEIRA JULIANA D;MACHADO V RACHEL HELENA;HALPERN HELIO;MONTEIRO FREDERICO L J;NOUJAIM PATRICIA M;COHEN V; RICARDO;DE SOUZA MARCIO G;AMODEO CELSO;BORTOLOTTO LUIZ; A;BERWANGER OTAVIO;CAVALCANTI ALEXANDRE B;DRAGER; LUCIANO F	SCHIAVON, CA (CORRESPONDING AUTHOR), HEART HOSP HCOR, RES INST, ABILIO SOARES ST 250,12TH FLOOR, BR-04004050 SAO PAULO, SP, BRAZIL		SCHIAVON;SCHIAVON;RES INST;HARVARD MED SCH;OSWALDO CRUZ GERMAN HOSP;DANTE PAZZANESE INST CARDIOL;UNIV FED SAO PAULO;UNIV SAO PAULO;ALBERT EINSTEIN HOSP;UNIV SAO PAULO	SCHIAVON C, 2020, ANN INTERN MED		ISI
COMORBIDITIES; GASTRIC BYPASS; PERIOPERATIVE COMPLICATIONS; RANDOMIZED; CLINICAL TRIAL; SLEEVE GASTRECTOMY; Y GASTRIC BYPASS; BARIATRIC SURGERY; MEDICAL THERAPY; EXPERIENCE; LEAKS	Y GASTRIC BYPASS; BARIATRIC SURGERY; MEDICAL THERAPY; EXPERIENCE; LEAKS	PETERLI, R (CORRESPONDING AUTHOR), CLARASPITAL, DEPT SURG, KLEINRIEHENSTR 30, CH-4016 BASEL, SWITZERLAND.; PETERLI, RALPH; BORBELY, YVES; KERN, BEATRICE; GASS, MARKUS; PETERS, THOMAS, CLARASPITAL, DEPT SURG, CH-4016 BASEL, SWITZERLAND.; PETERLI, RALPH; BORBELY, YVES; KERN, BEATRICE; GASS, MARKUS; PETERS, THOMAS, CLARASPITAL, DEPT INTERNAL MED, CH-4016 BASEL, SWITZERLAND.; BORBELY, YVES; LAEDERACH…	OBJECTIVE: LAPAROSCOPIC SLEEVE GASTRECTOMY (LSG) HAS BEEN PROPOSED AS AN EFFECTIVE ALTERNATIVE TO THE CURRENT STANDARD PROCEDURE, LAPAROSCOPIC ROUXEN-Y GASTRIC BYPASS (LRYGB). PROSPECTIVE DATA COMPARING BOTH PROCEDURES ARE RARE. THEREFORE, WE PERFORMED A RANDOMIZED CLINICAL TRIAL ASSESSING THE EFFECTIVENESS AND SAFETY OF THESE 2 OPERATIVE TECHNIQUES. METHODS: TWO HUNDRED SEVENTEEN PATIENTS WERE R…	TWO COMMERCE SQ, 2001 MARKET ST, PHILADELPHIA, PA 19103 USA	UNIVERSITY OF BERN; UNIVERSITY HOSPITAL OF BERN; UNIVERSITY OF BERN; UNIVERSITY HOSPITAL OF BERN; KANTONSSPITAL ST. GALLEN; UNIVERSITY OF ZURICH; UNIVERSITY ZURICH HOSPITAL	0003-4932	ANN. SURG.	ANNALS OF SURGERY	ENGLISH	PETERLI, RALPH/0000-0002-0038-9795 BORBELY, YVES/0000-0003-1997-0675 LAEDERACH, KURT/0000-0002-4222-0744	690-695	LIPPINCOTT WILLIAMS \& WILKINS	SURGERY	316	PETERLI R;BORBELY Y;KERN B;GASS M;PETERS T;THURNHEER M;SCHULTES B;LAEDERACH ;KURT K;BUETER M;SCHIESSER M	10.1097/SLA.0b013e3182a67426	EARLY RESULTS OF THE SWISS MULTICENTRE BYPASS OR SLEEVE STUDY (SMBOSS) A PROSPECTIVE RANDOMIZED TRIAL COMPARING LAPAROSCOPIC SLEEVE GASTRECTOMY AND ROUXENY GASTRIC BYPASS	2	2013	PETERLI RALPH;BORBELY YVES;KERN BEATRICE;GASS MARKUS; PETERS THOMAS;THURNHEER MARTIN;SCHULTES BERND;LAEDERACH; KURT;BUETER MARCO;SCHIESSER MARC	PETERLI, R (CORRESPONDING AUTHOR), CLARASPITAL, DEPT SURG, KLEINRIEHENSTR 30, CH-4016 BASEL, SWITZERLAND	comorbidities; gastric bypass; perioperative complications; randomized; clinical trial; sleeve gastrectomy	R (CORRESPONDING AUTHOR);UNIV BERN;UNIV BERN;SCHULTES;UNIV ZURICH HOSP	PETERLI R, 2013, ANN SURG		ISI
TYPE-2 DIABETES-MELLITUS; BARIATRIC SURGERY; WEIGHT-LOSS; GHRELIN; LEVELS; EXPERIENCE; APPETITE; HORMONES	TYPE-2 DIABETES-MELLITUS; BARIATRIC SURGERY; WEIGHT-LOSS; GHRELIN; LEVELS; EXPERIENCE; APPETITE; HORMONES	KALFARENTZOS, F (CORRESPONDING AUTHOR), UNIV PATRAS, UNIV HOSP PATRAS, OBES UNIT, PATRAS 26504, GREECE.; KALFARENTZOS, FOTIS, UNIV PATRAS, UNIV HOSP PATRAS, OBES UNIT, PATRAS 26504, GREECE.; KEHAGIAS, IOANNIS; KARAMANAKOS, STAVROS N.; ARGENTOU, MARIANNA; KALFARENTZOS, FOTIS, UNIV PATRAS, SCH MED, DEPT SURG, PATRAS 26504, GREECE.	LAPAROSCOPIC ROUX-EN-Y GASTRIC BYPASS (LRYGB) IS CURRENTLY THE GOLD STANDARD BARIATRIC PROCEDURE FOR THE TREATMENT OF MORBID OBESITY. LAPAROSCOPIC SLEEVE GASTRECTOMY (LSG) IS A RELATIVELY INNOVATIVE PROCEDURE WHICH HAS BEEN INCREASINGLY APPLIED LATELY AS A SOLE BARIATRIC PROCEDURE. A RANDOMIZED TRIAL WAS CONDUCTED IN A GREEK POPULATION TO EVALUATE PERIOPERATIVE SAFETY AND 3-YEARS RESULTS. SIXTY P…	233 SPRING ST, NEW YORK, NY 10013 USA	UNIVERSITY OF PATRAS; UNIVERSITY OF PATRAS	0960-8923	OBES. SURG.	OBESITY SURGERY	ENGLISH	ARGENTOU, MARIA-IOANNA/0000-0002-9944-2188	1650-1656	SPRINGER	SURGERY	309	KEHAGIAS I;KARAMANAKOS S;ARGENTOU M;KALFARENTZOS F	10.1007/s11695-011-0479-x	RANDOMIZED CLINICAL TRIAL OF LAPAROSCOPIC ROUXENY GASTRIC BYPASS VERSUS LAPAROSCOPIC SLEEVE GASTRECTOMY FOR THE MANAGEMENT OF PATIENTS WITH BMI \&LT; 50 KG/M<SUP>2</SUP>	2	2011	KEHAGIAS IOANNIS;KARAMANAKOS STAVROS N;ARGENTOU MARIANNA; KALFARENTZOS FOTIS	KALFARENTZOS, F (CORRESPONDING AUTHOR), UNIV PATRAS, UNIV HOSP PATRAS, OBES UNIT, PATRAS 26504, GREECE		UNIV PATRAS;UNIV PATRAS;UNIV PATRAS	KEHAGIAS I, 2011, OBES SURG		ISI
QUALITY-OF-LIFE; WEIGHT-LOSS; MORBID-OBESITY; BILIOPANCREATIC DIVERSION; RESPIRATORY-FUNCTION; WAIST CIRCUMFERENCE; DUODENAL SWITCH; SURGERY; MORTALITY; ACCUMULATION	QUALITY-OF-LIFE; WEIGHT-LOSS; MORBID-OBESITY; BILIOPANCREATIC DIVERSION; RESPIRATORY-FUNCTION; WAIST CIRCUMFERENCE; DUODENAL SWITCH; SURGERY; MORTALITY; ACCUMULATION	OLBERS, T (CORRESPONDING AUTHOR), SAHLGRENS UNIV HOSP, DEPT SURG, SE-41345 GOTHENBURG, SWEDEN.; SAHLGRENS UNIV HOSP, DEPT SURG \& GASTRO RES, SE-41345 GOTHENBURG, SWEDEN.; SAHLGRENS UNIV HOSP, DEPT BODY COMPOSIT \& METAB, SE-41345 GOTHENBURG, SWEDEN.	OBJECTIVE: TO ASSESS BODY COMPOSITION, EATING PATTERN, AND BASAL METABOLIC RATE IN PATIENTS UNDERGOING OBESITY SURGERY IN A RANDOMIZED TRIAL. INTRODUCTION: THERE IS LIMITED KNOWLEDGE REGARDING HOW DIFFERENT BARIATRIC SURGICAL TECHNIQUES FUNCTION IN TERMS OF ALTERING BODY COMPOSITION, DIETARY INTAKE, AND BASIC METABOLIC RATE. METHODS: NON-SUPEROBESE PATIENTS WERE RANDOMIZED TO LAPAROSCOPIC ROUX-EN…	TWO COMMERCE SQ, 2001 MARKET ST, PHILADELPHIA, PA 19103 USA	SAHLGRENSKA UNIVERSITY HOSPITAL; SAHLGRENSKA UNIVERSITY HOSPITAL	0003-4932	ANN. SURG.	ANNALS OF SURGERY	ENGLISH	BJORKMAN, SOFIA/0000-0001-9384-2562 OLBERS, TORSTEN/0000-0002-7218-3390 LONN (LONN), LARS/0000-0003-2089-5211	715-722	LIPPINCOTT WILLIAMS \& WILKINS	SURGERY	304	OLBERS T;BJORKMAN S;LINDROOS A;MALECKAS ;ALMANTAS A;LONN L;SJÖSTRÖM L;LONROTH H	10.1097/01.sla.0000218085.25902.f8	BODY COMPOSITION DIETARY INTAKE AND ENERGY EXPENDITURE AFTER LAPAROSCOPIC ROUXENY GASTRIC BYPASS AND LAPAROSCOPIC VERTICAL BANDED GASTROPLASTY : A RANDOMIZED CLINICAL TRIAL	2	2006	OLBERS TORSTEN;BJORKMAN SOFIA;LINDROOS AK;MALECKAS; ALMANTAS;LONN LARS;SJOSTROM LARS;LONROTH HANS	OLBERS, T (CORRESPONDING AUTHOR), SAHLGRENS UNIV HOSP, DEPT SURG, SE-41345 GOTHENBURG, SWEDEN		SAHLGRENS UNIV HOSP;SAHLGRENS UNIV HOSP;SAHLGRENS UNIV HOSP	OLBERS T, 2006, ANN SURG		ISI
ADULT; BONE DENSITY/PHYSIOLOGY; BONE DENSITY CONSERVATION AGENTS/THERAPEUTIC USE; BONE DISEASES, METABOLIC/BLOOD/ETIOLOGY/PATHOLOGY/PREVENTION & CONTROL; CALCIUM CITRATE/THERAPEUTIC USE; FEMALE; FOLLOW-UP STUDIES; GASTRIC BYPASS/ADVERSE EFFECTS; HIP/PATHOLOGY; HUMANS; MALE; MIDDLE AGED; OBESITY, MORBID/BLOOD/SURGERY; PARATHYROID HORMONE/BLOOD; PELVIC BONES/PHYSIOLOGY; POSTOPERATIVE COMPLICATIONS/…	ADULT;BONE DENSITY/PHYSIOLOGY;BONE DENSITY CONSERVATION AGENTS/THERAPEUTIC USE;BONE DISEASES, METABOLIC/BLOOD/ETIOLOGY/PATHOLOGY/PREVENTION & CONTROL;CALCIUM CITRATE/THERAPEUTIC USE;FEMALE;FOLLOW-UP STUDIES;GASTRIC BYPASS/ADVERSE EFFECTS;HIP/PATHOLOGY;HUMANS;MALE;MIDDLE AGED;OBESITY, MORBID/BLOOD/SURGERY;PARATHYROID HORMONE/BLOOD;PELVIC BONES/PHYSIOLOGY;POSTOPERATIVE COMPLICATIONS/PREVENTION & CO…	DIVISION OF ENDOCRINOLOGY, COLUMBIA UNIVERSITY COLLEGE OF PHYSICIANS AND SURGEONS, NEW YORK, NY 10032, USA.;	CONTEXT: BARIATRIC SURGERY IS COMMON AND MAY BE ASSOCIATED WITH DELETERIOUS EFFECTS ON THE SKELETON. OBJECTIVE: OUR OBJECTIVE WAS TO ASSESS BONE METABOLISM AND BONE MINERAL DENSITY (BMD) AFTER ROUX-EN-Y GASTRIC BYPASS. DESIGN AND SETTING: WE CONDUCTED A 1-YR PROSPECTIVE LONGITUDINAL STUDY AT A UNIVERSITY HOSPITAL BARIATRIC SURGERY PRACTICE AND METABOLIC BONE DISEASE UNIT. PARTICIPANTS: PARTICIPAN…			0021-972X (PRINT) 1945-7197 (ELECTRONIC) 0021-972X (LINKING)		THE JOURNAL OF CLINICAL ENDOCRINOLOGY AND METABOLISM	ENG		3735-40			294	FLEISCHER J;STEIN E;BESSLER M;DELLA B M;RESTUCCIA N;OLIVERO-RIVERA L;MCMAHON D;SILVERBERG S	10.1097/SLA.0b013e3181be34e7	THE DECLINE IN HIP BONE DENSITY AFTER GASTRIC BYPASS SURGERY IS ASSOCIATED WITH EXTENT OF WEIGHT LOSS	1	2008	FLEISCHER, J;STEIN, E M;BESSLER, M;DELLA BADIA, M;RESTUCCIA, N;OLIVERO-RIVERA, L;MCMAHON, D J;SILVERBERG, S J		Adult;Bone Density/physiology;Bone Density Conservation Agents/therapeutic use;Bone Diseases, Metabolic/blood/etiology/pathology/prevention & control;Calcium Citrate/therapeutic use;Female;Follow-Up Studies;Gastric Bypass/adverse effects;Hip/pathology;Humans;Male;Middle Aged;Obesity, Morbid/blood/surgery;Parathyroid Hormone/blood;Pelvic Bones/physiology;Postoperative Complications/prevention & co…	COLUMBIA UNIVERSITY COLLEGE OF PHYSICIANS AND SURGEONS	FLEISCHER J, 2008, J CLIN ENDOCRINOL METAB		PUBMED
Y GASTRIC BYPASS; INTENSIVE MEDICAL-MANAGEMENT; WEIGHT; THERAPY; INDIVIDUALS	Y GASTRIC BYPASS; INTENSIVE MEDICAL-MANAGEMENT; WEIGHT; THERAPY; INDIVIDUALS	COURCOULAS, AP (CORRESPONDING AUTHOR), UNIV PITTSBURGH, DEPT SURG, MED CTR, 3380 BLVD ALLIES,STE 390, PITTSBURGH, PA 15213 USA.; COURCOULAS, ANITA P.; PIERSON, SHEILA K.; EAGLETON, JESSIE K., UNIV PITTSBURGH, DEPT SURG, MED CTR, PITTSBURGH, PA 15213 USA.; BELLE, STEVEN H., UNIV PITTSBURGH, GRAD SCH PUBL HLTH, DEPT BIOSTAT, PITTSBURGH, PA 15213 USA.; BELLE, STEVEN H., UNIV PITTSBURGH, GRAD SCH PUB…	IMPORTANCE QUESTIONS REMAIN ABOUT THE ROLE AND DURABILITY OF BARIATRIC SURGERY FOR TYPE 2 DIABETES MELLITUS (T2DM). OBJECTIVE TO COMPARE THE REMISSION OF T2DM FOLLOWING SURGICAL AND NONSURGICAL TREATMENTS. DESIGN, SETTING, AND PARTICIPANTS IN THIS 3-ARM RANDOMIZED CLINICAL TRIAL CONDUCTED AT THE UNIVERSITY OF PITTSBURGH MEDICAL CENTER FROM OCTOBER 1, 2009, TO JUNE 26, 2014, IN PITTSBURGH, PENNSYL…	330 N WABASH AVE, STE 39300, CHICAGO, IL 60611-5885 USA	PENNSYLVANIA COMMONWEALTH SYSTEM OF HIGHER EDUCATION (PCSHE); UNIVERSITY OF PITTSBURGH; PENNSYLVANIA COMMONWEALTH SYSTEM OF HIGHER EDUCATION (PCSHE); UNIVERSITY OF PITTSBURGH; PENNSYLVANIA COMMONWEALTH SYSTEM OF HIGHER EDUCATION (PCSHE); UNIVERSITY OF PITTSBURGH; DUQUESNE UNIVERSITY; PENNSYLVANIA COMMONWEALTH SYSTEM OF HIGHER EDUCATION (PCSHE); UNIVERSITY OF PITTSBURGH; PENNSYLVANIA COMMONWEALTH …	2168-6254	JAMA SURG.	JAMA SURGERY	ENGLISH	PIERSON, SHEILA/0000-0002-3736-1411 KENNEDY, JESSIE/0000-0003-0557-5789	931-940	AMER MEDICAL ASSOC	SURGERY	293	COURCOULAS A;BELLE S;NEIBERG R;PIERSON S;EAGLETON J;KALARCHIAN M;DELANY J;LANG W;JAKICIC J	10.1016/j.soard.2014.02.044	THREEYEAR OUTCOMES OF BARIATRIC SURGERY VS LIFESTYLE INTERVENTION FOR TYPE 2 DIABETES MELLITUS TREATMENT A RANDOMIZED CLINICAL TRIAL	1	2015	COURCOULAS ANITA P;BELLE STEVEN H;NEIBERG REBECCA H; PIERSON SHEILA K;EAGLETON JESSIE K;KALARCHIAN MELISSA A;DELANY JAMES P;LANG WEI;JAKICIC JOHN M	COURCOULAS, AP (CORRESPONDING AUTHOR), UNIV PITTSBURGH, DEPT SURG, MED CTR, 3380 BLVD ALLIES,STE 390, PITTSBURGH, PA 15213 USA		UNIV PITTSBURGH;UNIV PITTSBURGH;UNIV PITTSBURGH;UNIV PITTSBURGH;WAKE FOREST SCH MED;DUQUESNE UNIV;UNIV PITTSBURGH;UNIV PITTSBURGH	COURCOULAS A, 2015, JAMA SURG		ISI
ADULT; BODY MASS INDEX; C-PEPTIDE/BLOOD/METABOLISM; DIABETES MELLITUS, TYPE 2/COMPLICATIONS; FEMALE; FOLLOW-UP STUDIES; GASTRIC BYPASS; GLUCAGON/BLOOD/METABOLISM; GLUCAGON-LIKE PEPTIDE 1/BLOOD/METABOLISM; GLUCOSE/METABOLISM; HUMANS; HYPERGLYCEMIA/PREVENTION & CONTROL; INSULIN RESISTANCE; INSULIN-SECRETING CELLS/METABOLISM; MALE; MIDDLE AGED; OBESITY/COMPLICATIONS/METABOLISM/PHYSIOPATHOLOGY/SURGER…	ADULT;BODY MASS INDEX;C-PEPTIDE/BLOOD/METABOLISM;DIABETES MELLITUS, TYPE 2/COMPLICATIONS;FEMALE;FOLLOW-UP STUDIES;GASTRIC BYPASS;GLUCAGON/BLOOD/METABOLISM;GLUCAGON-LIKE PEPTIDE 1/BLOOD/METABOLISM;GLUCOSE/METABOLISM;HUMANS;HYPERGLYCEMIA/PREVENTION & CONTROL;INSULIN RESISTANCE;INSULIN-SECRETING CELLS/METABOLISM;MALE;MIDDLE AGED;OBESITY/COMPLICATIONS/METABOLISM/PHYSIOPATHOLOGY/SURGERY;OBESITY, MORBI…	DEPARTMENT OF ENDOCRINOLOGY, HVIDOVRE HOSPITAL, HVIDOVRE, DENMARK.; NILS.;BRUUN.;JOERGENSEN@GMAIL.;COM	OUR AIM WAS TO STUDY THE POTENTIAL MECHANISMS RESPONSIBLE FOR THE IMPROVEMENT IN GLUCOSE CONTROL IN TYPE 2 DIABETES (T2D) WITHIN DAYS AFTER ROUX-EN-Y GASTRIC BYPASS (RYGB). THIRTEEN OBESE SUBJECTS WITH T2D AND TWELVE MATCHED SUBJECTS WITH NORMAL GLUCOSE TOLERANCE (NGT) WERE EXAMINED DURING A LIQUID MEAL BEFORE (PRE), 1 WK, 3 MO, AND 1 YR AFTER RYGB. GLUCOSE, INSULIN, C-PEPTIDE, GLUCAGON-LIKE PEPT…			1522-1555 (ELECTRONIC) 0193-1849 (LINKING)		AMERICAN JOURNAL OF PHYSIOLOGY. ENDOCRINOLOGY AND METABOLISM	ENG		E122-31			285	JØRGENSEN N;JACOBSEN S;DIRKSEN C;BOJSEN-MØLLER K;NAVER L;HVOLRIS L;CLAUSEN T;WULFF B;WORM D;LINDQVIST H D;MADSBAD S;HOLST J	10.1152/AJPENDO.00073.2012	ACUTE AND LONGTERM EFFECTS OF ROUXENY GASTRIC BYPASS ON GLUCOSE METABOLISM IN SUBJECTS WITH TYPE 2 DIABETES AND NORMAL GLUCOSE TOLERANCE	1	2012	JØRGENSEN, N B;JACOBSEN, S H;DIRKSEN, C;BOJSEN-MØLLER, K N;NAVER, L;HVOLRIS, L;CLAUSEN, T R;WULFF, B S;WORM, D;LINDQVIST HANSEN, D;MADSBAD, S;HOLST, J J		Adult;Body Mass Index;C-Peptide/blood/metabolism;Diabetes Mellitus, Type 2/complications;Female;Follow-Up Studies;Gastric Bypass;Glucagon/blood/metabolism;Glucagon-Like Peptide 1/blood/metabolism;Glucose/metabolism;Humans;Hyperglycemia/prevention & control;Insulin Resistance;Insulin-Secreting Cells/metabolism;Male;Middle Aged;Obesity/complications/metabolism/physiopathology/surgery;Obesity, Morbi…	HVIDOVRE HOSPITAL	JØRGENSEN N, 2012, AM J PHYSIOL ENDOCRINOL METAB		PUBMED
JEJUNAL BYPASS SLEEVE; VERTICAL BANDED GASTROPLASTY; GASTRIC BYPASS; MORBID-OBESITY; ILEAL TRANSPOSITION; CO-MORBIDITIES; PEPTIDE-YY; FOLLOW-UP; EXPERIENCE; FEASIBILITY	JEJUNAL BYPASS SLEEVE; VERTICAL BANDED GASTROPLASTY; GASTRIC BYPASS; MORBID-OBESITY; ILEAL TRANSPOSITION; CO-MORBIDITIES; PEPTIDE-YY; FOLLOW-UP; EXPERIENCE; FEASIBILITY	SCHOUTEN, R (CORRESPONDING AUTHOR), ATRIUM MED CTR, DEPT SURG, POB 4446, NL-6401 CX HEERLEN, NETHERLANDS.; SCHOUTEN, RUBEN; GREVE, JAN-WILLEM M., ATRIUM MED CTR, DEPT SURG, NL-6401 CX HEERLEN, NETHERLANDS.; RIJS, CARIANNE S.; JANSSEN, IGNACE M. C., RIJNSTATE HOSP, DEPT SURG, ARNHEM, NETHERLANDS.; BOUVY, NICOLE D., MAASTRICHT UNIV, MED CTR, DEPT SURG, MAASTRICHT, NETHERLANDS.; HAMEETEMAN, WIM; KOE…	BACKGROUND: THE ENDOSCOPICALLY PLACED DUODENAL-JEJUNAL BYPASS SLEEVE OR ENDOBARRIER GASTROINTESTINAL LINER HAS BEEN DESIGNED TO ACHIEVE WEIGHT LOSS IN MORBIDLY OBESE PATIENTS. WE REPORT ON THE FIRST EUROPEAN EXPERIENCE WITH THIS DEVICE. METHODS: A MULTICENTER, RANDOMIZED CLINICAL TRIAL WAS PERFORMED. FORTY-ONE PATIENTS WERE INCLUDED AND 30 UNDERWENT SLEEVE IMPLANTATION. ELEVEN PATIENTS SERVED AS …	TWO COMMERCE SQ, 2001 MARKET ST, PHILADELPHIA, PA 19103 USA	ATRIUM MEDICAL CENTER; RIJNSTATE HOSPITAL; MAASTRICHT UNIVERSITY; MAASTRICHT UNIVERSITY	0003-4932	ANN. SURG.	ANNALS OF SURGERY	ENGLISH	JANSSEN, IGNACE/0000-0001-5666-754X	236-243	LIPPINCOTT WILLIAMS \& WILKINS	SURGERY	263	SCHOUTEN R;RIJS C;BOUVY N;HAMEETEMAN W;KOEK G;JANSSEN I;GREVE ;JAN-WILLEM M J	10.1097/SLA.0b013e3181bdfbff	A MULTICENTER RANDOMIZED EFFICACY STUDY OF THE ENDOBARRIER GASTROINTESTINAL LINER FOR PRESURGICAL WEIGHT LOSS PRIOR TO BARIATRIC SURGERY	1	2010	SCHOUTEN RUBEN;RIJS CARIANNE S;BOUVY NICOLE D; HAMEETEMAN WIM;KOEK GER H;JANSSEN IGNACE M C;GREVE; JAN-WILLEM M	SCHOUTEN, R (CORRESPONDING AUTHOR), ATRIUM MED CTR, DEPT SURG, POB 4446, NL-6401 CX HEERLEN, NETHERLANDS		SCHOUTEN;SCHOUTEN;ATRIUM MED CTR;RIJNSTATE HOSP;MAASTRICHT UNIV;MAASTRICHT UNIV	SCHOUTEN R, 2010, ANN SURG		ISI
ADOLESCENT; ADULT; FEMALE; GASTRIC BYPASS; HUMANS; LAPAROSCOPY; MALE; MIDDLE AGED; OBESITY; MORBID; POSTOPERATIVE COMPLICATIONS; PROSPECTIVE STUDIES; REOPERATION; TREATMENT OUTCOME; ABDOMINAL WALL; ARTICLE; BODY MASS; CLINICAL TRIAL; CONTROLLED CLINICAL TRIAL; CONTROLLED STUDY; EVOLUTIONARY ADAPTATION; FOLLOW UP; HUMAN; INTERMETHOD COMPARISON; INTRAOPERATIVE PERIOD; LAPAROSCOPIC SURGERY; LEARNING…	ADOLESCENT; ADULT; FEMALE; GASTRIC BYPASS; HUMANS; LAPAROSCOPY; MALE; MIDDLE AGED; OBESITY; MORBID; POSTOPERATIVE COMPLICATIONS; PROSPECTIVE STUDIES; REOPERATION; TREATMENT OUTCOME; ABDOMINAL WALL; ADULT; ARTICLE; BODY MASS; CLINICAL TRIAL; CONTROLLED CLINICAL TRIAL; CONTROLLED STUDY; EVOLUTIONARY ADAPTATION; FEMALE; FOLLOW UP; HUMAN; INTERMETHOD COMPARISON; INTRAOPERATIVE PERIOD; LAPAROSCOPIC SU…	DEPARTAMENTO DE CIRUGIA GENERAL, HOSP. UNIV. VIRGEN DE LA ARRIXACA, 30120 EL PALMAR, MURCIA, SPAIN; SERVICIO DE CIRUGÍA GENERAL, HOSP. UNIV. VIRGEN DE LA ARRIXACA, 30120 EL PALMAR, MURCIA, SPAIN	OBJECTIVE: THE OBJECTIVE OF THE STUDY WAS TO COMPARE THE RESULTS OF OPEN VERSUS LAPAROSCOPIC GASTRIC BYPASS IN THE TREATMENT OF MORBID OBESITY. SUMMARY BACKGROUND DATA: GASTRIC BYPASS IS ONE OF THE MOST COMMONLY ACKNOWLEDGED SURGICAL TECHNIQUES FOR THE MANAGEMENT OF MORBID OBESITY. IT IS USUALLY PERFORMED AS AN OPEN SURGERY PROCEDURE, ALTHOUGH NOW SOME GROUPS PERFORM IT VIA THE LAPAROSCOPIC APPRO…			00034932	ANN. SURG.	ANNALS OF SURGERY	ENGLISH		433 – 437			262	LUJÁN J;FRUTOS M;HERNÁNDEZ Q;LIRON R;CUENCA J;VALERO G;PARRILLA P	10.1097/01.sla.0000120071.75691.1f	LAPAROSCOPIC VERSUS OPEN GASTRIC BYPASS IN THE TREATMENT OF MORBID OBESITY: A RANDOMIZED PROSPECTIVE STUDY	1	2004	LUJÁN JUAN A;FRUTOS M DOLORES;HERNÁNDEZ QUITERIA;LIRON RAMÓN;CUENCA JOSE R;VALERO GRACIELA;PARRILLA PASCUAL	J.A. LUJÁN; SERVICIO DE CIRUGÍA GENERAL, HOSP. UNIV. VIRGEN DE LA ARRIXACA, 30120 EL PALMAR, MURCIA, SPAIN; EMAIL: JLUJANM@TELELINE.ES		HOSP. UNIV. VIRGEN DE LA ARRIXACA;HOSP. UNIV. VIRGEN DE LA ARRIXACA	LUJÁN J, 2004, ANN SURG	https://www.scopus.com/inward/record.uri?eid=2-s2.0-1642395133&doi=10.1097%2f01.sla.0000120071.75691.1f&partnerID=40&md5=6b007b2c726a6f8825e4750799a53ae1	SCOPUS
BLOOD GLUCOSE; DIABETES MELLITUS; TYPE 2; FASTING; FEMALE; GASTRIC BYPASS; GASTRIC EMPTYING; GASTRIC INHIBITORY POLYPEPTIDE; GLUCAGON; GLUCAGON-LIKE PEPTIDE 1; HUMANS; INSULIN RESISTANCE; INSULIN-SECRETING CELLS; MALE; MIDDLE AGED; PEPTIDE FRAGMENTS; RECEPTORS; EX 9; EXENDIN (9 39); GLUCAGON LIKE PEPTIDE 1; GLUCAGON LIKE PEPTIDE 1 RECEPTOR AGONIST; GLUCOSE; INSULIN; SODIUM CHLORIDE; UNCLASSIFIED …	BLOOD GLUCOSE; DIABETES MELLITUS; TYPE 2; FASTING; FEMALE; GASTRIC BYPASS; GASTRIC EMPTYING; GASTRIC INHIBITORY POLYPEPTIDE; GLUCAGON; GLUCAGON-LIKE PEPTIDE 1; HUMANS; INSULIN RESISTANCE; INSULIN-SECRETING CELLS; MALE; MIDDLE AGED; PEPTIDE FRAGMENTS; RECEPTORS; GLUCAGON; EX 9; EXENDIN (9 39); GLUCAGON LIKE PEPTIDE 1; GLUCAGON LIKE PEPTIDE 1 RECEPTOR AGONIST; GLUCOSE; INSULIN; SODIUM CHLORIDE; UNC…	DEPARTMENT OF ENDOCRINOLOGY, HVIDOVRE HOSPITAL, HVIDOVRE, DENMARK; DEPARTMENT OF BIOMEDICAL SCIENCES, FACULTY OF HEALTH SCIENCES, UNIVERSITY OF COPENHAGEN, COPENHAGEN, DENMARK; NOVO NORDISK FOUNDATION CENTRE FOR BASIC METABOLIC RESEARCH, UNIVERSITY OF COPENHAGEN, COPENHAGEN, DENMARK; DEPARTMENT OF SURGICAL GASTROENTEROLOGY, HVIDOVRE HOSPITAL, HVIDOVRE, DENMARK	Β-CELL FUNCTION IMPROVES IN PATIENTS WITH TYPE 2 DIABETES IN RESPONSE TO AN ORAL GLUCOSE STIMULUS AFTER ROUX-EN-Y GASTRIC BYPASS (RYGB) SURGERY. THIS HAS BEEN LINKED TO THE EXAGGERATED SECRETION OF GLUCAGON-LIKE PEPTIDE 1 (GLP-1), BUT CAUSALITY HAS NOT BEEN ESTABLISHED. THE AIM OF THIS STUDY WAS TO INVESTIGATE THE ROLE OF GLP-1 IN IMPROVING Β-CELL FUNCTION AND GLUCOSE TOLERANCE AND REGULATING GLU…			1939327X	DIABETES	DIABETES	ENGLISH		3044 – 3052			259	JØRGENSEN N;DIRKSEN C;BOJSEN-MØLLER K;JACOBSEN S;WORM D;HANSEN D;KRISTIANSEN V;NAVER L;MADSBAD S;HOLST J	10.2337/db13-0022	EXAGGERATED GLUCAGONLIKE PEPTIDE 1 RESPONSE IS IMPORTANT FOR IMPROVED ΒCELL FUNCTION AND GLUCOSE TOLERANCE AFTER ROUXENY GASTRIC BYPASS IN PATIENTS WITH TYPE 2 DIABETES	1	2013	JØRGENSEN NILS B;DIRKSEN CARSTEN;BOJSEN-MØLLER KIRSTINE N;JACOBSEN SIV H;WORM DORTE;HANSEN DORTE L;KRISTIANSEN VIGGO B;NAVER LARS;MADSBAD STEN;HOLST JENS J	N.B. JØRGENSEN; DEPARTMENT OF ENDOCRINOLOGY, HVIDOVRE HOSPITAL, HVIDOVRE, DENMARK; EMAIL: NILS.BRUUN.JOERGENSEN@REGIONH.DK		HVIDOVRE HOSPITAL;UNIVERSITY OF COPENHAGEN;UNIVERSITY OF COPENHAGEN;HVIDOVRE HOSPITAL	JØRGENSEN N, 2013, DIABETES	https://www.scopus.com/inward/record.uri?eid=2-s2.0-84885473538&doi=10.2337%2fdb13-0022&partnerID=40&md5=f4923f2151ccc64451dc0b92bb9020ad	SCOPUS
ANASTOMOSIS, ROUX-EN-Y; BACTERIA/CLASSIFICATION/GENETICS/ISOLATION & PURIFICATION; BIODIVERSITY; FECES/MICROBIOLOGY; FEMALE; GASTROINTESTINAL MICROBIOME; HUMANS; LONGITUDINAL STUDIES; MALE; METAGENOMICS; OBESITY, MORBID/MICROBIOLOGY/SURGERY; SEQUENCE ANALYSIS, DNA; TREATMENT OUTCOME; WEIGHT LOSS	ANASTOMOSIS, ROUX-EN-Y;BACTERIA/CLASSIFICATION/GENETICS/ISOLATION & PURIFICATION;BIODIVERSITY;FECES/MICROBIOLOGY;FEMALE;GASTROINTESTINAL MICROBIOME;HUMANS;LONGITUDINAL STUDIES;MALE;METAGENOMICS;OBESITY, MORBID/MICROBIOLOGY/SURGERY;SEQUENCE ANALYSIS, DNA;TREATMENT OUTCOME;WEIGHT LOSS	THE NOVO NORDISK FOUNDATION CENTER FOR BASIC METABOLIC RESEARCH, FACULTY OF HEALTH AND MEDICAL SCIENCES, UNIVERSITY OF COPENHAGEN, 2200, COPENHAGEN, DENMARK.; THE NOVO NORDISK FOUNDATION CENTER FOR BASIC METABOLIC RESEARCH, FACULTY OF HEALTH AND MEDICAL SCIENCES, UNIVERSITY OF COPENHAGEN, 2200, COPENHAGEN, DENMARK.; DANISH DIABETES ACADEMY, 5000, ODENSE, DENMARK.; THE NOVO NORDISK FOUNDATION CENT…	BACKGROUND: ROUX-EN-Y GASTRIC BYPASS (RYGB) IS AN EFFECTIVE MEANS TO ACHIEVE SUSTAINED WEIGHT LOSS FOR MORBIDLY OBESE INDIVIDUALS. BESIDES RAPID WEIGHT REDUCTION, PATIENTS ACHIEVE MAJOR IMPROVEMENTS OF INSULIN SENSITIVITY AND GLUCOSE HOMEOSTASIS. DYSBIOSIS OF GUT MICROBIOTA HAS BEEN ASSOCIATED WITH OBESITY AND SOME OF ITS CO-MORBIDITIES, LIKE TYPE 2 DIABETES, AND MAJOR CHANGES OF GUT MICROBIAL CO…			1756-994X (ELECTRONIC) 1756-994X (LINKING)		GENOME MEDICINE	ENG		67			258	PALLEJA A;KASHANI A;ALLIN K;NIELSEN T;ZHANG C;LI Y;BRACH T;LIANG S;FENG Q;JØRGENSEN N;BOJSEN-MØLLER K;DIRKSEN C;BURGDORF K;HOLST J;MADSBAD S;WANG J;PEDERSEN O;HANSEN T;ARUMUGAM M	10.1186/S13073-016-0312-1	ROUXENY GASTRIC BYPASS SURGERY OF MORBIDLY OBESE PATIENTS INDUCES SWIFT AND PERSISTENT CHANGES OF THE INDIVIDUAL GUT MICROBIOTA	1	2016	PALLEJA, ALBERT;KASHANI, ALIREZA;ALLIN, KRISTINE H;NIELSEN, TRINE;ZHANG, CHENCHEN;LI, YIN;BRACH, THORSTEN;LIANG, SUISHA;FENG, QIANG;JØRGENSEN, NILS BRUUN;BOJSEN-MØLLER, KIRSTINE N;DIRKSEN, CARSTEN;BURGDORF, KRISTOFFER S;HOLST, JENS J;MADSBAD, STEN;WANG, JUN;PEDERSEN, OLUF;HANSEN, TORBEN;ARUMUGAM, MANIMOZHIYAN		Anastomosis, Roux-en-Y;Bacteria/classification/genetics/isolation & purification;Biodiversity;Feces/microbiology;Female;Gastrointestinal Microbiome;Humans;Longitudinal Studies;Male;Metagenomics;Obesity, Morbid/microbiology/surgery;Sequence Analysis, DNA;Treatment Outcome;Weight Loss	UNIVERSITY OF COPENHAGEN;UNIVERSITY OF COPENHAGEN;DANISH DIABETES ACADEMY;UNIVERSITY OF COPENHAGEN;UNIVERSITY OF COPENHAGEN;UNIVERSITY OF COPENHAGEN;HVIDOVRE HOSPITAL;HVIDOVRE HOSPITAL;HVIDOVRE HOSPITAL;UNIVERSITY OF COPENHAGEN;UNIVERSITY OF COPENHAGEN;UNIVERSITY OF COPENHAGEN;HVIDOVRE HOSPITAL;CHINA AGRICULTURAL UNIVERSITY;UNIVERSITY OF COPENHAGEN;UNIVERSITY OF COPENHAGEN;UNIVERSITY OF COPENHAGE…	PALLEJA A, 2016, GENOME MED		PUBMED
ADOLESCENT; BARIATRIC SURGERY/METHODS; BODY MASS INDEX; FEMALE; HUMANS; LONGITUDINAL STUDIES; MALE; OBESITY, MORBID/SURGERY; POSTOPERATIVE COMPLICATIONS; PROSPECTIVE STUDIES; RISK FACTORS; TREATMENT OUTCOME; UNITED STATES; YOUNG ADULT	ADOLESCENT;BARIATRIC SURGERY/METHODS;BODY MASS INDEX;FEMALE;HUMANS;LONGITUDINAL STUDIES;MALE;OBESITY, MORBID/SURGERY;POSTOPERATIVE COMPLICATIONS;PROSPECTIVE STUDIES;RISK FACTORS;TREATMENT OUTCOME;UNITED STATES;YOUNG ADULT	CINCINNATI CHILDREN'S HOSPITAL MEDICAL CENTER, CINCINNATI, OHIO.; CINCINNATI CHILDREN'S HOSPITAL MEDICAL CENTER, CINCINNATI, OHIO.; CINCINNATI CHILDREN'S HOSPITAL MEDICAL CENTER, CINCINNATI, OHIO.; CINCINNATI CHILDREN'S HOSPITAL MEDICAL CENTER, CINCINNATI, OHIO.; TEXAS CHILDREN'S HOSPITAL, BAYLOR COLLEGE OF MEDICINE, HOUSTON, TEXAS.; NATIONWIDE CHILDREN'S HOSPITAL, COLUMBUS, OHIO.; UNIVERSITY OF …	IMPORTANCE: SEVERE OBESITY IN CHILDHOOD IS A MAJOR HEALTH PROBLEM WITH FEW EFFECTIVE TREATMENTS. WEIGHT-LOSS SURGERY (WLS) IS BEING USED TO TREAT SEVERELY OBESE ADOLESCENTS, ALTHOUGH WITH VERY LIMITED DATA REGARDING SURGICAL SAFETY FOR CURRENTLY USED, MINIMALLY INVASIVE PROCEDURES. OBJECTIVE: TO ASSESS THE PREOPERATIVE CLINICAL CHARACTERISTICS AND PERIOPERATIVE SAFETY OUTCOMES OF SEVERELY OBESE A…			2168-6211 (ELECTRONIC) 2168-6203 (PRINT) 2168-6203 (LINKING)		JAMA PEDIATRICS	ENG		47-53			255	INGE T;ZELLER M;JENKINS T;HELMRATH M;BRANDT M;MICHALSKY M;HARMON C;COURCOULAS A;HORLICK M;XANTHAKOS S;DOLAN L;MITSNEFES M;BARNETT S;BUNCHER R	10.1001/JAMAPEDIATRICS.2013.4296	PERIOPERATIVE OUTCOMES OF ADOLESCENTS UNDERGOING BARIATRIC SURGERY: THE TEENLONGITUDINAL ASSESSMENT OF BARIATRIC SURGERY (TEENLABS) STUDY	1	2014	INGE, THOMAS H;ZELLER, MEG H;JENKINS, TODD M;HELMRATH, MICHAEL;BRANDT, MARY L;MICHALSKY, MARC P;HARMON, CARROLL M;COURCOULAS, ANITA;HORLICK, MARY;XANTHAKOS, STAVRA A;DOLAN, LARRY;MITSNEFES, MARK;BARNETT, SEAN J;BUNCHER, RALPH		Adolescent;Bariatric Surgery/methods;Body Mass Index;Female;Humans;Longitudinal Studies;Male;Obesity, Morbid/surgery;Postoperative Complications;Prospective Studies;Risk Factors;Treatment Outcome;United States;Young Adult	CINCINNATI CHILDREN'S HOSPITAL MEDICAL CENTER;CINCINNATI CHILDREN'S HOSPITAL MEDICAL CENTER;CINCINNATI CHILDREN'S HOSPITAL MEDICAL CENTER;CINCINNATI CHILDREN'S HOSPITAL MEDICAL CENTER;BAYLOR COLLEGE OF MEDICINE;NATIONWIDE CHILDREN'S HOSPITAL;UNIVERSITY OF ALABAMA AT BIRMINGHAM.;UNIVERSITY OF PITTSBURGH MEDICAL CENTER;NATIONAL INSTITUTE OF DIABETES AND DIGESTIVE AND KIDNEY DISEASES;CINCINNATI CHIL…	INGE T, 2014, JAMA PEDIATR		PUBMED
GASTRIC BYPASS-SURGERY; BETA-CELL FUNCTION; LIFE-STYLE INTERVENTION; GLUCAGON-LIKE PEPTIDE-1; GLUCOSE-TOLERANCE; INSULIN-SECRETION; GLYCEMIC; CONTROL; INCRETIN LEVELS; WEIGHT-LOSS; THERAPY	GASTRIC BYPASS-SURGERY; BETA-CELL FUNCTION; LIFE-STYLE INTERVENTION; GLUCAGON-LIKE PEPTIDE-1; GLUCOSE-TOLERANCE; INSULIN-SECRETION; GLYCEMIC; CONTROL; INCRETIN LEVELS; WEIGHT-LOSS; THERAPY	KASHYAP, SR (CORRESPONDING AUTHOR), CLEVELAND CLIN, ENDOCRINOL \& METAB INST, CLEVELAND, OH 44106 USA.; KASHYAP, SANGEETA R.; ABOOD, BETH; GUPTA, MANJULA, CLEVELAND CLIN, ENDOCRINOL \& METAB INST, CLEVELAND, OH 44106 USA.; BHATT, DEEPAK L., BRIGHAM \& WOMENS HOSP, VA BOSTON HEALTHCARE SYST, BOSTON, MA 02115 USA.; BHATT, DEEPAK L., HARVARD UNIV, SCH MED, BOSTON, MA USA.; WOLSKI, KATHY; POTHIER, CL…	OBJECTIVETO EVALUATE THE EFFECTS OF TWO BARIATRIC PROCEDURES VERSUS INTENSIVE MEDICAL THERAPY (IMT) ON -CELL FUNCTION AND BODY COMPOSITION.RESEARCH DESIGN AND METHODSTHIS WAS A PROSPECTIVE, RANDOMIZED, CONTROLLED TRIAL OF 60 SUBJECTS WITH UNCONTROLLED TYPE 2 DIABETES (HBA(1C) 9.7 1\%) AND MODERATE OBESITY (BMI 36 2 KG/M(2)) RANDOMIZED TO IMT ALONE, IMT PLUS ROUX-EN-Y GASTRIC BYPASS, OR IMT PLUS S…	1701 N BEAUREGARD ST, ALEXANDRIA, VA 22311-1717 USA	CLEVELAND CLINIC FOUNDATION; HARVARD UNIVERSITY; HARVARD UNIVERSITY MEDICAL AFFILIATES; US DEPARTMENT OF VETERANS AFFAIRS; VETERANS HEALTH ADMINISTRATION (VHA); VA BOSTON HEALTHCARE SYSTEM; BRIGHAM \& WOMEN'S HOSPITAL; HARVARD UNIVERSITY; HARVARD MEDICAL SCHOOL; CLEVELAND CLINIC FOUNDATION; UNIVERSITY OF SOUTHERN CALIFORNIA; UNIVERSITY OF TEXAS SYSTEM; UNIVERSITY OF TEXAS HEALTH SCIENCE CENTER AT…	0149-5992	DIABETES CARE	DIABETES CARE	ENGLISH	SCHAUER, PHILIP/0000-0002-4029-7537 BHATT, DEEPAK L./0000-0002-1278-6245 KASHYAP, SANGEETA/0000-0002-7489-6650	2175-2182	AMER DIABETES ASSOC	ENDOCRINOLOGY \& METABOLISM	254	KASHYAP S;BHATT D;WOLSKI K;WATANABE R;ABDUL-GHANI M;ABOOD B;POTHIER C;BRETHAUER S;NISSEN S;GUPTA ;MANJULA M;KIRWAN J;SCHAUER P	10.2337/dc12-1596	METABOLIC EFFECTS OF BARIATRIC SURGERY IN PATIENTS WITH MODERATE OBESITY AND TYPE 2 DIABETES ANALYSIS OF A RANDOMIZED CONTROL TRIAL COMPARING SURGERY WITH INTENSIVE MEDICAL TREATMENT	1	2013	KASHYAP SANGEETA R;BHATT DEEPAK L;WOLSKI KATHY; WATANABE RICHARD M;ABDUL-GHANI MUHAMMAD;ABOOD BETH; POTHIER CLAIRE E;BRETHAUER STACY;NISSEN STEVEN;GUPTA; MANJULA;KIRWAN JOHN P;SCHAUER PHILIP R	KASHYAP, SR (CORRESPONDING AUTHOR), CLEVELAND CLIN, ENDOCRINOL \& METAB INST, CLEVELAND, OH 44106 USA		ENDOCRINOL AND METAB INST;ENDOCRINOL AND METAB INST;BRIGHAM AND WOMENS HOSP;HARVARD UNIV;MILLER FAMILY HEART AND VASC INST;UNIV SO CALIF;UNIV TEXAS HLTH SCI CTR SAN ANTONIO;SCHAUER;LERNER RES INST	KASHYAP S, 2013, DIABETES CARE		ISI
BARIATRIC SURGERY; TCF7 L2 GENE VARIATION; TYPE 2 DIABETES MELLITUS; ADULT; AGED; BLOOD GLUCOSE; DIABETES MELLITUS; TYPE 2; FEMALE; FOLLOW-UP STUDIES; GASTRIC BYPASS; HUMANS; MALE; MIDDLE AGED; OBESITY; MORBID; POLYMORPHISM; GENETIC; TIME FACTORS; TRANSCRIPTION FACTOR 7-LIKE 2 PROTEIN; WEIGHT LOSS; YOUNG ADULT; GLUCOSE; HEMOGLOBIN A1C; TRANSCRIPTION FACTOR 7 LIKE 2; GLUCOSE BLOOD LEVEL; TCF7L2 PR…	ADULT; AGED; BLOOD GLUCOSE; DIABETES MELLITUS; TYPE 2; FEMALE; FOLLOW-UP STUDIES; GASTRIC BYPASS; HUMANS; MALE; MIDDLE AGED; OBESITY; MORBID; POLYMORPHISM; GENETIC; TIME FACTORS; TRANSCRIPTION FACTOR 7-LIKE 2 PROTEIN; WEIGHT LOSS; YOUNG ADULT; GLUCOSE; HEMOGLOBIN A1C; TRANSCRIPTION FACTOR 7 LIKE 2; GLUCOSE BLOOD LEVEL; TCF7L2 PROTEIN; HUMAN; TRANSCRIPTION FACTOR 7 LIKE 2; ADULT; ALLELE; ARTICLE; …	INSERM, UMR 859 BIOTHERAPIES FOR DIABETES, LILLE, 59000, FRANCE; CHRU, LILLE, FRANCE; EUROPEAN GENETIC INSTITUTE FOR DIABETES, LILLE, FRANCE; UNIVERSITY OF LILLE-NORD DE FRANCE, LILLE, FRANCE; CNRS UMR 8199, INSTITUT PASTEUR DE LILLE, FRANCE	BACKGROUND: ROUX-EN-Y GASTRIC BYPASS (RYGB) SURGERY IMPROVES GLUCOSE CONTROL IN MOST BUT NOT ALL PATIENTS WITH TYPE 2 DIABETES MELLITUS (T2 DM). TRANSCRIPTION FACTOR 7-LIKE 2 (TCF7 L2) GENE VARIATION (RS790314O, C: WILD-TYPE ALLELE, T: RISK-ALLELE) IS THE STRONGEST CONTRIBUTOR TO T2 DM RISK. UNTIL NOW, THERE ARE NO STUDIES INVESTIGATING GENE INTERACTIONS WITH CHANGES OF GLYCEMIA IN OBESE PATIENTS…			15507289	SURG. OBES. RELAT. DIS.	SURGERY FOR OBESITY AND RELATED DISEASES	ENGLISH		679 – 683	ELSEVIER INC.		254	ROUSKAS K;CAUCHI S;RAVERDY V;YENGO L;FROGUEL P;PATTOU F	10.1210/JC.2012-3736	WEIGHT LOSS INDEPENDENT ASSOCIATION OF TCF7 L2 GENE POLYMORPHISM WITH FASTING BLOOD GLUCOSE AFTER ROUXENY GASTRIC BYPASS IN TYPE 2 DIABETIC PATIENTS	1	2014	ROUSKAS KONSTANTINOS;CAUCHI STEPHANE;RAVERDY VIOLETA;YENGO LOIC;FROGUEL PHILIPPE;PATTOU FRANÇOIS		Bariatric surgery; TCF7 L2 gene variation; Type 2 Diabetes Mellitus	EUROPEAN GENETIC INSTITUTE FOR DIABETES;UNIVERSITY OF LILLE-NORD DE FRANCE;FRANCE	ROUSKAS K, 2014, SURG OBES RELAT DIS	https://www.scopus.com/inward/record.uri?eid=2-s2.0-84908068363&doi=10.1016%2fj.soard.2013.12.016&partnerID=40&md5=9a6a471be1478f99f3499a0e6e06fd35	SCOPUS
ADOLESCENT; BODY MASS INDEX; CARDIOVASCULAR DISEASES; FEMALE; GASTRIC BYPASS; HUMANS; LAPAROSCOPY; MALE; OBESITY; MORBID; PEDIATRIC OBESITY; PROSPECTIVE STUDIES; RISK FACTORS; SWEDEN; TREATMENT OUTCOME; ABDOMINAL SURGERY; ADOLESCENT OBESITY; ADULT; ARTICLE; BODY MASS; CARDIOVASCULAR RISK; COMORBIDITY; CONSERVATIVE TREATMENT; CONTROLLED CLINICAL TRIAL; CONTROLLED STUDY; HEALTH CARE UTILIZATION; HO…	ADOLESCENT; BODY MASS INDEX; CARDIOVASCULAR DISEASES; FEMALE; GASTRIC BYPASS; HUMANS; LAPAROSCOPY; MALE; OBESITY; MORBID; PEDIATRIC OBESITY; PROSPECTIVE STUDIES; RISK FACTORS; SWEDEN; TREATMENT OUTCOME; ABDOMINAL SURGERY; ADOLESCENT; ADOLESCENT OBESITY; ADULT; ARTICLE; BODY MASS; CARDIOVASCULAR RISK; COMORBIDITY; CONSERVATIVE TREATMENT; CONTROLLED CLINICAL TRIAL; CONTROLLED STUDY; FEMALE; HEALTH …	DEPARTMENT OF GASTROSURGICAL RESEARCH, SAHLGRENSKA UNIVERSITY HOSPITAL, INSTITUTE OF CLINICAL SCIENCES, UNIVERSITY OF GOTHENBURG, GOTHENBURG, SWEDEN; DEPARTMENT OF PAEDIATRICS, SAHLGRENSKA UNIVERSITY HOSPITAL, INSTITUTE OF CLINICAL SCIENCES, UNIVERSITY OF GOTHENBURG, GOTHENBURG, SWEDEN; DEPARTMENT OF HEALTH AND CARE SCIENCES, SAHLGRENSKA UNIVERSITY HOSPITAL, INSTITUTE OF CLINICAL SCIENCES, UNIVER…	BACKGROUND SEVERE OBESITY IN ADOLESCENCE IS ASSOCIATED WITH REDUCED LIFE EXPECTANCY AND IMPAIRED QUALITY OF LIFE. LONG-TERM BENEFITS OF CONSERVATIVE TREATMENTS IN ADOLESCENTS ARE KNOWN TO BE MODEST, WHEREAS SHORT-TERM OUTCOMES OF ADOLESCENT BARIATRIC SURGERY ARE PROMISING. WE AIMED TO COMPARE 5-YEAR OUTCOMES OF ADOLESCENT SURGICAL PATIENTS AFTER ROUX-EN-Y GASTRIC BYPASS WITH THOSE OF CONSERVATIVE…			22138587	LANCET DIABETES ENDOCRINOL.	THE LANCET DIABETES AND ENDOCRINOLOGY	ENGLISH		174 – 183	LANCET PUBLISHING GROUP		250	OLBERS T;BEAMISH A;GRONOWITZ E;FLODMARK C;DAHLGREN J;BRUZE G;EKBOM K;FRIBERG P;GÖTHBERG G;JÄRVHOLM K;KARLSSON J;MÅRILD S;NEOVIUS M;PELTONEN M;MARCUS C	10.1016/S2213-8587(16)30424-7	LAPAROSCOPIC ROUXENY GASTRIC BYPASS IN ADOLESCENTS WITH SEVERE OBESITY (AMOS): A PROSPECTIVE 5YEAR SWEDISH NATIONWIDE STUDY	1	2017	OLBERS TORSTEN;BEAMISH ANDREW J;GRONOWITZ EVA;FLODMARK CARL-ERIK;DAHLGREN JOVANNA;BRUZE GUSTAF;EKBOM KERSTIN;FRIBERG PETER;GÖTHBERG GUNNAR;JÄRVHOLM KAJSA;KARLSSON JAN;MÅRILD STAFFAN;NEOVIUS MARTIN;PELTONEN MARKKU;MARCUS CLAUDE	T. OLBERS; DEPARTMENT OF GASTROSURGICAL RESEARCH, INSTITUTE OF CLINICAL SCIENCES, UNIVERSITY OF GOTHENBURG, SAHLGRENSKA UNIVERSITY HOSPITAL, GOTHENBURG, 41 345, SWEDEN; EMAIL: TORSTEN.OLBERS@GU.SE		SAHLGRENSKA UNIVERSITY HOSPITAL;SAHLGRENSKA UNIVERSITY HOSPITAL;SAHLGRENSKA UNIVERSITY HOSPITAL;SAHLGRENSKA UNIVERSITY HOSPITAL;ROYAL COLLEGE OF SURGEONS OF ENGLAND;SKÅNE UNIVERSITY HOSPITAL;KAROLINSKA UNIVERSITY HOSPITAL;KAROLINSKA INSTITUTET;SAHLGRENSKA UNIVERSITY HOSPITAL;LUND UNIVERSITY;NATIONAL INSTITUTE FOR HEALTH AND WELFARE	OLBERS T, 2017, LANCET DIABETES ENDOCRINOL	https://www.scopus.com/inward/record.uri?eid=2-s2.0-85008640850&doi=10.1016%2fS2213-8587%2816%2930424-7&partnerID=40&md5=cb8cb4e8da9da37087ff05a329d9706e	SCOPUS
BARIATRIC SURGERY/METHODS; BLOOD GLUCOSE/METABOLISM; BODY MASS INDEX; BODY WEIGHT; DIABETES MELLITUS, TYPE 2/METABOLISM/SURGERY; FEMALE; GASTRIC BYPASS/METHODS; GASTROINTESTINAL HORMONES/METABOLISM; GLUCAGON-LIKE PEPTIDE 1/METABOLISM; HUMANS; INSULIN/BLOOD; INSULIN RESISTANCE; INSULIN-SECRETING CELLS/METABOLISM; MALE; MIDDLE AGED; OBESITY, MORBID/METABOLISM/SURGERY; PROSPECTIVE STUDIES; WEIGHT LO…	BARIATRIC SURGERY/METHODS;BLOOD GLUCOSE/METABOLISM;BODY MASS INDEX;BODY WEIGHT;DIABETES MELLITUS, TYPE 2/METABOLISM/SURGERY;FEMALE;GASTRIC BYPASS/METHODS;GASTROINTESTINAL HORMONES/METABOLISM;GLUCAGON-LIKE PEPTIDE 1/METABOLISM;HUMANS;INSULIN/BLOOD;INSULIN RESISTANCE;INSULIN-SECRETING CELLS/METABOLISM;MALE;MIDDLE AGED;OBESITY, MORBID/METABOLISM/SURGERY;PROSPECTIVE STUDIES;WEIGHT LOSS	ENDOCRINOLOGY AND METABOLISM INSTITUTE, CLEVELAND CLINIC FOUNDATION, CLEVELAND, OH 44195, USA.; KASHYAS@CCF.;ORG	CONTEXT: HYPERGLYCEMIA RESOLVES QUICKLY AFTER BARIATRIC SURGERY, BUT THE UNDERLYING MECHANISM AND THE MOST EFFECTIVE TYPE OF SURGERY REMAINS UNCLEAR. OBJECTIVE: TO EXAMINE GLUCOSE METABOLISM AND BETA-CELL FUNCTION IN PATIENTS WITH TYPE 2 DIABETES MELLITUS (T2DM) AFTER TWO TYPES OF BARIATRIC INTERVENTION; ROUX-EN-Y GASTRIC BYPASS (RYGB) AND GASTRIC RESTRICTIVE (GR) SURGERY. DESIGN: PROSPECTIVE, NO…			1476-5497 (ELECTRONIC) 0307-0565 (PRINT) 0307-0565 (LINKING)		INTERNATIONAL JOURNAL OF OBESITY (2005)	ENG		462-71			248	KASHYAP S;DAUD S;KELLY K;GASTALDELLI A;WIN H;BRETHAUER S;KIRWAN J;SCHAUER P	10.1038/IJO.2009.254	ACUTE EFFECTS OF GASTRIC BYPASS VERSUS GASTRIC RESTRICTIVE SURGERY ON BETACELL FUNCTION AND INSULINOTROPIC HORMONES IN SEVERELY OBESE PATIENTS WITH TYPE 2 DIABETES	2	2010	KASHYAP, S R;DAUD, S;KELLY, K R;GASTALDELLI, A;WIN, H;BRETHAUER, S;KIRWAN, J P;SCHAUER, P R		Bariatric Surgery/methods;Blood Glucose/metabolism;Body Mass Index;Body Weight;Diabetes Mellitus, Type 2/metabolism/surgery;Female;Gastric Bypass/methods;Gastrointestinal Hormones/metabolism;Glucagon-Like Peptide 1/metabolism;Humans;Insulin/blood;Insulin Resistance;Insulin-Secreting Cells/metabolism;Male;Middle Aged;Obesity, Morbid/metabolism/surgery;Prospective Studies;Weight Loss	ENDOCRINOLOGY AND METABOLISM INSTITUTE	KASHYAP S, 2010, INT J OBES (LOND)		PUBMED
BARIATRIC SURGERY; DIABETES; INTENSIVE LIFESTYLE; METABOLIC SURGERY; RANDOMISED CONTROLLED TRIAL; QUALITY-OF-LIFE; OBESE-PATIENTS; THERAPY; MANAGEMENT; MORTALITY; REMISSION; SEEKING	QUALITY-OF-LIFE; BARIATRIC SURGERY; OBESE-PATIENTS; THERAPY; MANAGEMENT; MORTALITY; REMISSION; SEEKING	CUMMINGS, DE (CORRESPONDING AUTHOR), UNIV WASHINGTON, DEPT MED, BOX 358280,MAIL STOP 111, SEATTLE, WA 98195 USA.; CUMMINGS, DAVID E.; FOSTER-SCHUBERT, KAREN E., UNIV WASHINGTON, DEPT MED, BOX 358280,MAIL STOP 111, SEATTLE, WA 98195 USA.; ARTERBURN, DAVID E.; WESTBROOK, EMILY O., GRP HLTH RES INST, SEATTLE, WA USA.; KUZMA, JESSICA N.; KRATZ, MARIO, FRED HUTCHINSON CANC RES CTR, 1124 COLUMBIA ST, S…	MOUNTING EVIDENCE INDICATES THAT ROUX-EN-Y GASTRIC BYPASS (RYGB) AMELIORATES TYPE 2 DIABETES, BUT RANDOMISED TRIALS COMPARING SURGICAL VS NONSURGICAL CARE ARE NEEDED. WITH A PARALLEL-GROUP RANDOMISED CONTROLLED TRIAL (RCT), WE COMPARED RYGB VS AN INTENSIVE LIFESTYLE AND MEDICAL INTERVENTION (ILMI) FOR TYPE 2 DIABETES, INCLUDING AMONG PATIENTS WITH A BMI < 35 KG/M(2). BY USE OF A SHARED DECISION-M…	ONE NEW YORK PLAZA, SUITE 4600, NEW YORK, NY, UNITED STATES	UNIVERSITY OF WASHINGTON; UNIVERSITY OF WASHINGTON SEATTLE; FRED HUTCHINSON CANCER CENTER; UNIVERSITY OF WASHINGTON; UNIVERSITY OF WASHINGTON SEATTLE; UNIVERSITY OF NEW MEXICO	0012-186X	DIABETOLOGIA	DIABETOLOGIA	ENGLISH		945-953	SPRINGER	ENDOCRINOLOGY \& METABOLISM	246	CUMMINGS D;ARTERBURN D;WESTBROOK E;KUZMA J;STEWART S;CHAN C;BOCK ;STEVEN N S;LANDERS J;KRATZ M;FOSTER-SCHUBERT ;KAREN E K;FLUM D	10.1007/s00125-016-3903-x	GASTRIC BYPASS SURGERY VS INTENSIVE LIFESTYLE AND MEDICAL INTERVENTION FOR TYPE 2 DIABETES: THE CROSSROADS RANDOMISED CONTROLLED TRIAL	1	2016	CUMMINGS DAVID E;ARTERBURN DAVID E;WESTBROOK EMILY O; KUZMA JESSICA N;STEWART SKYE D;CHAN CHUN P;BOCK; STEVEN N;LANDERS JEFFREY T;KRATZ MARIO;FOSTER-SCHUBERT; KAREN E;FLUM DAVID R	CUMMINGS, DE (CORRESPONDING AUTHOR), UNIV WASHINGTON, DEPT MED, BOX 358280,MAIL STOP 111, SEATTLE, WA 98195 USA	Bariatric surgery; Diabetes; Intensive lifestyle; Metabolic surgery; Randomised controlled trial	UNIV WASHINGTON;UNIV WASHINGTON;GRP HLTH RES INST;FRED HUTCHINSON CANC RES CTR;UNIV WASHINGTON;UNIV NEW MEXICO	CUMMINGS D, 2016, DIABETOLOGIA		ISI
BARIATRIC SURGERY; TYPE-2; OUTCOMES; ADULTS; HYPERTENSION; REMISSION; MELLITUS; WEIGHT; 5-YEAR; GOALS	BARIATRIC SURGERY; TYPE-2; OUTCOMES; ADULTS; HYPERTENSION; REMISSION; MELLITUS; WEIGHT; 5-YEAR; GOALS	BILLINGTON, CJ (CORRESPONDING AUTHOR), UNIV MINNESOTA, DEPT MED, 516 DELAWARE ST SOUTHEAST,MMC 101, MINNEAPOLIS, MN 55455 USA.; IKRAMUDDIN, SAYEED; LESLIE, DANIEL B., UNIV MINNESOTA, DEPT SURG, MINNEAPOLIS, MN 55455 USA.; KORNER, JUDITH, COLUMBIA UNIV, MED CTR, DIV ENDOCRINOL, DEPT MED, NEW YORK, NY USA.; LEE, WEI-JEI, NATL TAIWAN UNIV HOSP, SURG DEPT, TAIPEI, TAIWAN.; THOMAS, AVIS J.; CONNETT, J…	IMPORTANCE THE ROUX-EN-Y GASTRIC BYPASS IS EFFECTIVE IN ACHIEVING ESTABLISHED DIABETES TREATMENT TARGETS, BUT DURABILITY IS UNKNOWN. OBJECTIVE TO COMPARE DURABILITY OF ROUX-EN-Y GASTRIC BYPASS ADDED TO INTENSIVE LIFESTYLE AND MEDICAL MANAGEMENT IN ACHIEVING DIABETES CONTROL TARGETS. DESIGN, SETTING, AND PARTICIPANTS OBSERVATIONAL FOLLOW-UP OF A RANDOMIZED CLINICAL TRIAL AT 4 SITES IN THE UNITED S…	330 N WABASH AVE, STE 39300, CHICAGO, IL 60611-5885 USA	UNIVERSITY OF MINNESOTA SYSTEM; UNIVERSITY OF MINNESOTA TWIN CITIES; COLUMBIA UNIVERSITY; NATIONAL TAIWAN UNIVERSITY; NATIONAL TAIWAN UNIVERSITY HOSPITAL; UNIVERSITY OF MINNESOTA SYSTEM; UNIVERSITY OF MINNESOTA TWIN CITIES; OPTUM; UNIVERSITY OF MINNESOTA SYSTEM; UNIVERSITY OF MINNESOTA TWIN CITIES; ICAHN SCHOOL OF MEDICINE AT MOUNT SINAI; UNIVERSITY OF MINNESOTA SYSTEM; UNIVERSITY OF MINNESOTA TW…	0098-7484	JAMA-J. AM. MED. ASSOC.	JAMA-JOURNAL OF THE AMERICAN MEDICAL ASSOCIATION	ENGLISH	BELANI, KUMAR/0000-0003-1784-136X WANG, QI/0000-0001-6341-6087 CHUANG, LEE-MING/0000-0003-0978-2662	266-278	AMER MEDICAL ASSOC	GENERAL \& INTERNAL MEDICINE	241	IKRAMUDDIN S;KORNER J;LEE W;THOMAS A;J. J;CONNETT J;BANTLE J;LESLIE D;WANG Q;INABNET W;JEFFERY R;CHONG ;KEONG K;CHUANG L;JENSEN M;VELLA A;AHMED L;BELANI K;BILLINGTON C	10.1001/jama.2017.20813	LIFESTYLE INTERVENTION AND MEDICAL MANAGEMENT WITH VS WITHOUT ROUXENY GASTRIC BYPASS AND CONTROL OF HEMOGLOBIN A1C LDL CHOLESTEROL AND SYSTOLIC BLOOD PRESSURE AT 5 YEARS IN THE DIABETES SURGERY STUDY	1	2018	IKRAMUDDIN SAYEED;KORNER JUDITH;LEE WEI-JEI;THOMAS AVIS; J;CONNETT JOHN E;BANTLE JOHN P;LESLIE DANIEL B; WANG QI;INABNET III WILLIAM B;JEFFERY ROBERT W;CHONG; KEONG;CHUANG LEE-MING;JENSEN MICHAEL D;VELLA ADRIAN; AHMED LEAQUE;BELANI KUMAR;BILLINGTON CHARLES J	BILLINGTON, CJ (CORRESPONDING AUTHOR), UNIV MINNESOTA, DEPT MED, 516 DELAWARE ST SOUTHEAST,MMC 101, MINNEAPOLIS, MN 55455 USA		UNIV MINNESOTA;UNIV MINNESOTA;COLUMBIA UNIV;NATL TAIWAN UNIV HOSP;UNIV MINNESOTA;UNIV MINNESOTA;MT SINAI MED CTR;UNIV MINNESOTA;MIN SHENG GEN HOSP;NATL TAIWAN UNIV HOSP;MAYO CLIN;HARLEM HOSP MED CTR;UNIV MINNESOTA	IKRAMUDDIN S, 2018, JAMA-J AM MED ASSOC		ISI
BARIATRIC SURGERY; SLEEVE GASTRECTOMY; ROUX-EN-Y GASTRIC BYPASS; TYPE 2; DIABETES; IMS SCORE; Y GASTRIC BYPASS; TYPE-2 DIABETES-MELLITUS; LIFE-STYLE INTERVENTION; WEIGHT-LOSS; GLYCEMIC CONTROL; MEDICAL THERAPY; MORBID-OBESITY; SINGLE-CENTER; GASTRECTOMY; REMISSION	Y GASTRIC BYPASS; TYPE-2 DIABETES-MELLITUS; LIFE-STYLE INTERVENTION; WEIGHT-LOSS; GLYCEMIC CONTROL; MEDICAL THERAPY; MORBID-OBESITY; SINGLE-CENTER; GASTRECTOMY; REMISSION	SALMINEN, P (CORRESPONDING AUTHOR), UNIV TURKU, TURKU UNIV HOSP, DEPT SURG, DIV DIGEST SURG \& UROL, POB 52, TURKU 20521, FINLAND.; SAARINEN, ILMARI; GRONROOS, SOFIA; HELMIO, MIKA; SALMINEN, PAULINA, TURKU UNIV HOSP, DEPT DIGEST SURG, DIV DIGEST SURG \& UROL, TURKU, FINLAND.; SAARINEN, ILMARI; GRONROOS, SOFIA; HELMIO, MIKA; STRANDBERG, MARJATTA; SALMINEN, PAULINA, UNIV TURKU, DEPT SURG, TURKU, FI…	BACKGROUND: LSG AND LRYGB ARE GLOBALLY THE MOST COMMON BARIATRIC PROCEDURES. IMS SCORE CAT-EGORIZES T2D SEVERITY (MILD, MODERATE, AND SEVERE) BASED ON 4 INDEPENDENT PREOPERATIVE PREDICTORS OF LONG-TERM REMISSION AS FOLLOWS: T2D DURATION, NUMBER OF DIABETES MEDICATIONS, INSULIN USE, AND GLY-CEMIC CONTROL. IMS SCORE HAS NOT BEEN VALIDATED IN A RANDOMIZED PATIENT COHORT.OBJECTIVES: TO ASSESS THE FEA…	STE 800, 230 PARK AVE, NEW YORK, NY 10169 USA	UNIVERSITY OF TURKU; UNIVERSITY OF TURKU; UNIVERSITY OF TURKU; UNIVERSITY OF BASEL; UNIVERSITY OF BASEL; UNIVERSITY OF ZURICH; UNIVERSITY ZURICH HOSPITAL; UNIVERSITY OF TURKU; UNIVERSITY OF TURKU	1550-7289	SURG. OBES. RELAT. DIS.	SURGERY FOR OBESITY AND RELATED DISEASES	ENGLISH	SALMINEN, PAULINA/0000-0001-6435-9264 SAARINEN, ILMARI/0000-0003-4609-5781 WOLNERHANSSEN, BETTINA/0000-0003-3134-2743 PETERLI, RALPH/0000-0002-0038-9795	522-529	ELSEVIER SCIENCE INC	SURGERY	241	SAARINEN I;GRONROOS S;HURME S;PETERLI R;HELMIO M;BUETER M;STRANDBERG M;WOLNERHANSSEN B;SALMINEN P	10.1016/j.soard.2022.10.036	VALIDATION OF THE INDIVIDUALIZED METABOLIC SURGERY SCORE FOR BARIATRIC PROCEDURE SELECTION IN THE MERGED DATA OF TWO RANDOMIZED CLINICAL TRIALS (SLEEVEPASS AND SMBOSS)	1	2023	SAARINEN ILMARI;GRONROOS SOFIA;HURME SAIJA;PETERLI RALPH;HELMIO MIKA;BUETER MARCO;STRANDBERG MARJATTA; WOLNERHANSSEN BETTINA K;SALMINEN PAULINA	SALMINEN, P (CORRESPONDING AUTHOR), UNIV TURKU, TURKU UNIV HOSP, DEPT SURG, DIV DIGEST SURG \& UROL, POB 52, TURKU 20521, FINLAND	Bariatric surgery; Sleeve gastrectomy; Roux-en-y gastric bypass; Type 2; diabetes; IMS score	UNIV TURKU;TURKU UNIV HOSP;UNIV TURKU;SATASAIRAALA CENT HOSP;UNIV TURKU;UNIV BASEL;UNIV CTR GASTROINTESTINAL AND LIVER DIS;UNIV HOSP BASEL;UNIV HOSP;TURKU UNIV HOSP;ST CLARA HOSP;UNIV TURKU	SAARINEN I, 2023, SURG OBES RELAT DIS		ISI
HYPERVENTILATION; LAPAROSCOPIC SURGERY; PAIN; RECRUITMENT MANEUVER; VAS SCORE; ATRACURIUM BESILATE; FENTANYL; PROPOFOL; ADULT; ANESTHESIA INDUCTION; ARTERIAL PRESSURE; ARTICLE; ARTIFICIAL VENTILATION; BLOOD PRESSURE; BODY WEIGHT; BREATHING RATE; COMPARATIVE STUDY; CONTROLLED STUDY; DRUG EFFICACY; DRUG SAFETY; END TIDAL CARBON DIOXIDE TENSION; FEMALE; HEART RATE; HEMODYNAMICS; HUMAN; INCIDENCE; LA…	ATRACURIUM BESILATE; FENTANYL; PROPOFOL; ADULT; ANESTHESIA INDUCTION; ARTERIAL PRESSURE; ARTICLE; ARTIFICIAL VENTILATION; BLOOD PRESSURE; BODY WEIGHT; BREATHING RATE; COMPARATIVE STUDY; CONTROLLED STUDY; DRUG EFFICACY; DRUG SAFETY; END TIDAL CARBON DIOXIDE TENSION; FEMALE; HEART RATE; HEMODYNAMICS; HUMAN; HYPERVENTILATION; INCIDENCE; LAPAROSCOPIC CHOLECYSTECTOMY; LAPAROSCOPIC SURGERY; MAJOR CLINI…	ANESTHESIA AND INTENSIVE CARE, FACULTY OF MEDICINE, MANSOURA UNIVERSITY, DAKAHLIA GOVERNORATE, 35516, EGYPT	OBJECTIVES: ACIDIC MILIEU CREATED BY CARBON DIOXIDE IS ASSOCIATED WITH POST LAPAROSCOPIC SURGICAL PAIN. GAS WASHING TECHNIQUES WERE USED TO REDUCE SUCH EFFECTS. THIS TRIAL COMPARED PULMONARY RECRUITMENT MANEUVER (PRM) VERSUS EXTENDED HYPERVENTILATION TECHNIQUE (EHV) REGARDING POSTOPERATIVE PAIN PROFILE IN LAPAROSCOPIC CHOLECYSTECTOMY PATIENTS. METHODS: IN A PROSPECTIVE, RANDOMIZED CONTROLLED STUD…			13345605	SIGNA VITAE	SIGNA VITAE	ENGLISH		119 – 124	PHARMAMED MADO LTD		240	ABOELELA M;ALREFAEY A	10.2337/db12-1762	VENTILATION STRATEGIES AND POSTOPERATIVE PAIN IN LAPAROSCOPIC CHOLECYSTECTOMY: PULMONARY RECRUITMENT MANEUVER VERSUS EXTENDED HYPERVENTILATION: A PROSPECTIVE RANDOMIZED STUDY	1	2021	ABOELELA MOHAMED ADEL;ALREFAEY ALREFAEY KANDEEL	M.A. ABOELELA; ANESTHESIA AND INTENSIVE CARE, FACULTY OF MEDICINE, MANSOURA UNIVERSITY, DAKAHLIA GOVERNORATE, 35516, EGYPT; EMAIL: ABOELELA_MOHAMED@YAHOO.COM	Hyperventilation; Laparoscopic surgery; Pain; Recruitment maneuver; VAS score	MANSOURA UNIVERSITY	ABOELELA M, 2021, SIGNA VITAE	https://www.scopus.com/inward/record.uri?eid=2-s2.0-85120413443&doi=10.22514%2fsv.2021.073&partnerID=40&md5=f96114a1fa3c3aef5e1d4477b1e115b5	SCOPUS
METABOLIC SYNDROME; RHEUMATOID-ARTHRITIS; VEGETARIAN DIET; INSULIN-RESISTANCE; GASTRIC BYPASS; ALCOHOL INTAKE; RISK; INFLAMMATION; EFFICACY; MULTICENTER	METABOLIC SYNDROME; RHEUMATOID-ARTHRITIS; VEGETARIAN DIET; INSULIN-RESISTANCE; GASTRIC BYPASS; ALCOHOL INTAKE; RISK; INFLAMMATION; EFFICACY; MULTICENTER	GISONDI, P (CORRESPONDING AUTHOR), UNIV VERONA, SECT DERMATOL \& VENEREOL, DEPT BIOMED \& SURG SCI, PIAZZALE A STEFANI 1, I-37126 VERONA, ITALY.; GISONDI, PAOLO; DEL GIGLIO, MICOL; GIROLOMONI, GIAMPIERO, UNIV VERONA, SECT DERMATOL \& VENEREOL, DEPT BIOMED \& SURG SCI, I-37126 VERONA, ITALY.; DI FRANCESCO, VINCENZO; ZAMBONI, MAURO, UNIV VERONA, SECT GERIAT, DEPT BIOMED \& SURG SCI, I-37126 VERONA,…	BACKGROUND: CHRONIC PLAQUE PSORIASIS IS FREQUENTLY ASSOCIATED WITH OBESITY. THE EFFECT OF A HYPOENERGETIC DIET ON PSORIASIS HAS NOT BEEN INVESTIGATED. OBJECTIVE: THE OBJECTIVE WAS TO INVESTIGATE WHETHER MODERATE WEIGHT LOSS (IE, 5-10\% OF BODY WEIGHT) INCREASES THE THERAPEUTIC RESPONSE TO A LOW DOSE OF CYCLOSPORINE IN OBESE PATIENTS WITH MODERATE-TO-SEVERE CHRONIC PLAQUE PSORIASIS. DESIGN: A24-WK…	9650 ROCKVILLE PIKE, SUBSCRIPTIONS, RM L-3300, BETHESDA, MD 20814-3998 USA	UNIVERSITY OF VERONA; UNIVERSITY OF VERONA	0002-9165	AM. J. CLIN. NUTR.	AMERICAN JOURNAL OF CLINICAL NUTRITION	ENGLISH	ZAMBONI, MAURO/0000-0001-6961-9483 GISONDI, PAOLO/0000-0002-1777-9001	1242-1247	AMER SOC CLINICAL NUTRITION	NUTRITION \& DIETETICS	239	GISONDI P;DEL G M;DI F V;ZAMBONI M;GIROLOMONI G	10.1016/j.soard.2013.12.016	WEIGHT LOSS IMPROVES THE RESPONSE OF OBESE PATIENTS WITH MODERATETOSEVERE CHRONIC PLAQUE PSORIASIS TO LOWDOSE CYCLOSPORINE THERAPY: A RANDOMIZED CONTROLLED INVESTIGATORBLINDED CLINICAL TRIAL	1	2008	GISONDI PAOLO;DEL GIGLIO MICOL;DI FRANCESCO VINCENZO; ZAMBONI MAURO;GIROLOMONI GIAMPIERO	GISONDI, P (CORRESPONDING AUTHOR), UNIV VERONA, SECT DERMATOL \& VENEREOL, DEPT BIOMED \& SURG SCI, PIAZZALE A STEFANI 1, I-37126 VERONA, ITALY		UNIV VERONA;UNIV VERONA;UNIV VERONA	GISONDI P, 2008, AM J CLIN NUTR		ISI
ADOLESCENT; ADULT; AGED; CALORIC RESTRICTION; DIABETES MELLITUS; TYPE 2; FEMALE; GASTRIC BYPASS; HUMANS; INSULIN RESISTANCE; INSULIN-SECRETING CELLS; MALE; MIDDLE AGED; YOUNG ADULT; FRUCTOSAMINE; GLUCOSE; HEMOGLOBIN A1C; INSULIN; ARTICLE; BODY MASS; BODY WEIGHT; CELL FUNCTION; CLINICAL ARTICLE; CONTROLLED CLINICAL TRIAL; CONTROLLED STUDY; DIET; DIET THERAPY; DISEASE DURATION; FRUCTOSAMINE BLOOD L…	ADOLESCENT; ADULT; AGED; CALORIC RESTRICTION; DIABETES MELLITUS; TYPE 2; FEMALE; GASTRIC BYPASS; HUMANS; INSULIN RESISTANCE; INSULIN-SECRETING CELLS; MALE; MIDDLE AGED; YOUNG ADULT; FRUCTOSAMINE; GLUCOSE; HEMOGLOBIN A1C; INSULIN; ADULT; ARTICLE; BODY MASS; BODY WEIGHT; CALORIC RESTRICTION; CELL FUNCTION; CLINICAL ARTICLE; CONTROLLED CLINICAL TRIAL; CONTROLLED STUDY; DIET; DIET THERAPY; DISEASE DU…	DEPARTMENT OF MEDICINE, COLUMBIA UNIVERSITY COLLEGE OF PHYSICIANS AND SURGEONS, NEW YORK, NY, UNITED STATES; IRVING INSTITUTE FOR CLINICAL AND TRANSLATIONAL RESEARCH, COLUMBIA UNIVERSITY, NEW YORK, NY, UNITED STATES; DEPARTMENT OF SURGERY, COLUMBIA UNIVERSITY COLLEGE OF PHYSICIANS AND SURGEONS, NEW YORK, NY, UNITED STATES	MARKED IMPROVEMENT IN GLYCEMIC CONTROL OCCURS IN PATIENTS WITH TYPE 2 DIABETES MELLITUS SHORTLY AFTER ROUX-EN-Y GASTRIC BYPASS SURGERY (RYGB) AND BEFORE THERE IS MAJOR WEIGHT LOSS. THE OBJECTIVE OF THIS STUDY WAS TO DETERMINE WHETHER THE MAGNITUDE OF THIS CHANGE IS PRIMARILY DUE TO CALORIC RESTRICTION OR IS UNIQUE TO THE SURGICAL PROCEDURE. WE STUDIED ELEVEN SUBJECTS WHO UNDERWENT RYGB AND FOURTE…			1939327X	DIABETES	DIABETES	ENGLISH		3027 – 3032			236	JACKNESS C;KARMALLY W;FEBRES G;CONWELL I;AHMED L;BESSLER M;MCMAHON D;KORNER J	10.1007/S11695-008-9438-6	VERY LOWCALORIE DIET MIMICS THE EARLY BENEFICIAL EFFECT OF ROUXENY GASTRIC BYPASS ON INSULIN SENSITIVITY AND ΒCELL FUNCTION IN TYPE 2 DIABETIC PATIENTS	1	2013	JACKNESS CLIFTON;KARMALLY WAHIDA;FEBRES GERARDO;CONWELL IRENE M;AHMED LEAQUE;BESSLER MARC;MCMAHON DONALD J;KORNER JUDITH	J. KORNER; DEPARTMENT OF MEDICINE, COLUMBIA UNIVERSITY COLLEGE OF PHYSICIANS AND SURGEONS, NEW YORK, NY, UNITED STATES; EMAIL: JK181@COLUMBIA.EDU		COLUMBIA UNIVERSITY COLLEGE OF PHYSICIANS AND SURGEONS;COLUMBIA UNIVERSITY;COLUMBIA UNIVERSITY COLLEGE OF PHYSICIANS AND SURGEONS	JACKNESS C, 2013, DIABETES	https://www.scopus.com/inward/record.uri?eid=2-s2.0-84887361445&doi=10.2337%2fdb12-1762&partnerID=40&md5=f280e90913166ffbdca870e34560dd06	SCOPUS
ADULT; FEMALE; GASTRIC BYPASS; HERNIA; ABDOMINAL; HUMANS; INTESTINAL OBSTRUCTION; JEJUNOSTOMY; JEJUNUM; LAPAROSCOPY; MALE; MESENTERY; MIDDLE AGED; OPERATIVE TIME; POSTOPERATIVE COMPLICATIONS; REOPERATION; SWEDEN; WOUND CLOSURE TECHNIQUES; ABDOMINAL ABSCESS; ABDOMINAL WALL CLOSURE; ANASTOMOSIS LEAKAGE; ARTICLE; CARDIOVASCULAR DISEASE; CONTROLLED STUDY; FOLLOW UP; GASTROINTESTINAL STAPLER; GASTROJE…	ADULT; FEMALE; GASTRIC BYPASS; HERNIA; ABDOMINAL; HUMANS; INTESTINAL OBSTRUCTION; JEJUNOSTOMY; JEJUNUM; LAPAROSCOPY; MALE; MESENTERY; MIDDLE AGED; OPERATIVE TIME; POSTOPERATIVE COMPLICATIONS; REOPERATION; SWEDEN; WOUND CLOSURE TECHNIQUES; ABDOMINAL ABSCESS; ABDOMINAL WALL CLOSURE; ADULT; ANASTOMOSIS LEAKAGE; ARTICLE; CARDIOVASCULAR DISEASE; CONTROLLED STUDY; FEMALE; FOLLOW UP; GASTROINTESTINAL ST…	DEPARTMENT OF SURGERY, FACULTY OF MEDICINE AND HEALTH, ÖREBRO UNIVERSITY HOSPITAL, ÖREBRO, SE-70185, SWEDEN; DEPARTMENT OF CLINICAL EPIDEMIOLOGY AND BIOSTATISTICS, FACULTY OF MEDICINE AND HEALTH, ÖREBRO UNIVERSITY, ÖREBRO, SWEDEN; DIVISION OF SURGERY, DEPARTMENT OF CLINICAL SCIENCES, DANDERYD HOSPITAL, KAROLINSKA INSTITUTET, STOCKHOLM, SWEDEN; INSTITUTE OF SURGERY, SAHLGRENSKA ACADEMY, UNIVERSITY…	BACKGROUND SMALL BOWEL OBSTRUCTION DUE TO INTERNAL HERNIA IS A COMMON AND POTENTIALLY SERIOUS COMPLICATION AFTER LAPAROSCOPIC GASTRIC BYPASS SURGERY. WHETHER CLOSURE OF SURGICALLY CREATED MESENTERIC DEFECTS MIGHT REDUCE THE INCIDENCE IS UNKNOWN, SO WE DID A LARGE RANDOMISED TRIAL TO INVESTIGATE. METHOD THIS STUDY WAS A MULTICENTRE, RANDOMISED TRIAL WITH A TWO-ARM, PARALLEL DESIGN DONE AT 12 CENTR…			01406736	LANCET	THE LANCET	ENGLISH		1397 – 1404	LANCET PUBLISHING GROUP		236	STENBERG E;SZABO E;ÅGREN G;OTTOSSON J;MARSK R;LÖNROTH H;BOMAN L;MAGNUSON A;THORELL A;NÄSLUND I	10.1016/S0140-6736(15)01126-5	CLOSURE OF MESENTERIC DEFECTS IN LAPAROSCOPIC GASTRIC BYPASS: A MULTICENTRE RANDOMISED PARALLEL OPENLABEL TRIAL	1	2016	STENBERG ERIK;SZABO EVA;ÅGREN GÖRAN;OTTOSSON JOHAN;MARSK RICHARD;LÖNROTH HANS;BOMAN LARS;MAGNUSON ANDERS;THORELL ANDERS;NÄSLUND INGMAR	E. STENBERG; DEPARTMENT OF SURGERY, FACULTY OF MEDICINE AND HEALTH, ÖREBRO UNIVERSITY HOSPITAL, ÖREBRO, SE-70185, SWEDEN; EMAIL: ERIK.STENBERG@REGIONOREBROLAN.SE		ÖREBRO UNIVERSITY HOSPITAL;ÖREBRO UNIVERSITY;KAROLINSKA INSTITUTET;UNIVERSITY OF GOTHENBURG;LYCKSELE HOSPITAL;ERSTA HOSPITAL	STENBERG E, 2016, LANCET	https://www.scopus.com/inward/record.uri?eid=2-s2.0-84958064283&doi=10.1016%2fS0140-6736%2815%2901126-5&partnerID=40&md5=630aa2169024139247c0679255f590c0	SCOPUS
VITAMIN D; VITAMIN D SUPPLEMENTATION; OBESITY; GASTRIC BYPASS; OMEGA-LOOP GASTRIC BYPASS; WEIGHT LOSS; SECONDARY HYPERPARATHYROIDISM; LIVER FIBROSIS; FATTY LIVER-DISEASE; Y GASTRIC BYPASS; ROUX-EN-Y; BARIATRIC SURGERY; D; INSUFFICIENCY; D-RECEPTOR; EFFICACY; CHOLECALCIFEROL; ASSOCIATION; METABOLISM	FATTY LIVER-DISEASE; Y GASTRIC BYPASS; ROUX-EN-Y; BARIATRIC SURGERY; D; INSUFFICIENCY; D-RECEPTOR; EFFICACY; CHOLECALCIFEROL; ASSOCIATION; METABOLISM	KRUSCHITZ, R (CORRESPONDING AUTHOR), MED UNIV VIENNA, DIV ENDOCRINOL \& METAB, DEPT INTERNAL MED 3, VIENNA, AUSTRIA.; KRUSCHITZ, R (CORRESPONDING AUTHOR), RUDOLFSTIFTUNG HOSP, DEPT MED 1, JUCHGASSE 25, A-1030 VIENNA, AUSTRIA.; KRUSCHITZ, R (CORRESPONDING AUTHOR), RUDOLFSTIFTUNG HOSP, KARL LANDSTEINER INST OBES \& METAB DIS, JUCHGASSE 25, A-1030 VIENNA, AUSTRIA.; LUGER, MARIA; KRUSCHITZ, RENATE; S…	BARIATRIC PATIENTS OFTEN SUFFER FROM VITAMIN D DEFICIENCY (VDD), AND BOTH, MORBID OBESITY AND VDD, ARE RELATED TO NON-ALCOHOLIC FATTY LIVER DISEASE. HOWEVER, LIMITED DATA ARE AVAILABLE REGARDING BEST STRATEGIES FOR TREATING VDD, PARTICULARLY, IN BARIATRIC PATIENTS UNDERGOING OMEGA-LOOP GASTRIC BYPASS (OLGB). THEREFORE, WE EXAMINED THE EFFICACY AND SAFETY OF A FORCED VITAMIN D DOSING REGIMEN AND I…	ONE NEW YORK PLAZA, SUITE 4600, NEW YORK, NY, UNITED STATES	MEDICAL UNIVERSITY OF VIENNA; MEDICAL UNIVERSITY OF VIENNA; RUDOLFSTIFTUNG HOSPITAL; RUDOLFSTIFTUNG HOSPITAL; MEDICAL UNIVERSITY OF VIENNA; MEDICAL UNIVERSITY OF VIENNA; MEDICAL UNIVERSITY OF VIENNA; KONVENTHOSPITAL DER BARMHERZIGEN BRUDER; MEDICAL UNIVERSITY OF VIENNA; MEDICAL UNIVERSITY OF VIENNA	0960-8923	OBES. SURG.	OBESITY SURGERY	ENGLISH	MARCULESCU, RODRIG/0000-0003-1772-6695 WAKOLBINGER, MARIA/0000-0002-1991-6700 KALLAY, ENIKO/0000-0002-4996-0104 TRAUNER, MICHAEL/0000-0002-1275-6425 KRUSCHITZ, RENATE/0000-0001-6722-9780 KREBS, MICHAEL/0000-0002-9265-7274	1196-1207	SPRINGER	SURGERY	236	LUGER M;KRUSCHITZ R;KIENBACHER C;TRAUSSNIGG S;LANGER F;PRAGER G;SCHINDLER K;KALLAY E;HOPPICHLER F;TRAUNER M;KREBS M;MARCULESCU R;LUDVIK ;BERNHARD B	10.1007/s11695-016-2437-0	VITAMIN D3 LOADING IS SUPERIOR TO CONVENTIONAL SUPPLEMENTATION AFTER WEIGHT LOSS SURGERY IN VITAMIN DDEFICIENT MORBIDLY OBESE PATIENTS: A DOUBLEBLIND RANDOMIZED PLACEBOCONTROLLED TRIAL	1	2017	LUGER MARIA;KRUSCHITZ RENATE;KIENBACHER CHRISTIAN; TRAUSSNIGG STEFAN;LANGER FELIX B;PRAGER GERHARD; SCHINDLER KARIN;KALLAY ENIKOE;HOPPICHLER FRIEDRICH; TRAUNER MICHAEL;KREBS MICHAEL;MARCULESCU RODRIG;LUDVIK; BERNHARD	KRUSCHITZ, R (CORRESPONDING AUTHOR), MED UNIV VIENNA, DIV ENDOCRINOL \& METAB, DEPT INTERNAL MED 3, VIENNA, AUSTRIA	Vitamin D; Vitamin D supplementation; Obesity; Gastric bypass; Omega-loop gastric bypass; Weight loss; Secondary hyperparathyroidism; Liver fibrosis	MED UNIV VIENNA;KRUSCHITZ;KRUSCHITZ;KRUSCHITZ;SCHINDLER;MED UNIV VIENNA;SPECIAL INST PREVENT CARDIOL AND NUTR SIPCAN SAVE Y;MED UNIV VIENNA;KRUSCHITZ;RUDOLFSTIFTUNG HOSP;KRUSCHITZ;KARL LANDSTEINER INST OBES AND METAB DIS;MED UNIV VIENNA;MED UNIV VIENNA;MED UNIV VIENNA;MED UNIV VIENNA;MED UNIV VIENNA	LUGER M, 2017, OBES SURG		ISI
BARIATRIC SURGERY; GUT MICROBIOTA; METAGENOME SHOTGUN SEQUENCING; ROUX-EN-Y GASTRIC BYPASS; SLEEVE GASTRECTOMY; ADULT; DIABETES MELLITUS; TYPE 2; FEMALE; FOLLOW-UP STUDIES; GASTRECTOMY; GASTRIC BYPASS; GASTROINTESTINAL MICROBIOME; HUMANS; LAPAROSCOPY; MALE; MIDDLE AGED; OBESITY; POSTOPERATIVE PERIOD; REMISSION INDUCTION; TREATMENT OUTCOME; DNA FRAGMENT; HEMOGLOBIN A1C; INSULIN; METFORMIN; ACTINOB…	ADULT; DIABETES MELLITUS; TYPE 2; FEMALE; FOLLOW-UP STUDIES; GASTRECTOMY; GASTRIC BYPASS; GASTROINTESTINAL MICROBIOME; HUMANS; LAPAROSCOPY; MALE; MIDDLE AGED; OBESITY; POSTOPERATIVE PERIOD; REMISSION INDUCTION; TREATMENT OUTCOME; DNA FRAGMENT; HEMOGLOBIN A1C; INSULIN; METFORMIN; ACTINOBACTERIA; ADULT; ARTICLE; BACTEROIDETES; BARIATRIC SURGERY; CLINICAL ARTICLE; DESULFOVIBRIO; FECES ANALYSIS; FEMA…	DEPARTMENT OF MEDICINE, FACULTY OF MEDICAL AND HEALTH SCIENCES, UNIVERSITY OF AUCKLAND, PRIVATE BAG, AUCKLAND, 92019, NEW ZEALAND; DEPARTMENT OF BIOINFORMATICS, FACULTY OF MEDICAL AND HEALTH SCIENCES, UNIVERSITY OF AUCKLAND, AUCKLAND, NEW ZEALAND; SCHOOL OF BIOLOGICAL SCIENCES, UNIVERSITY OF AUCKLAND, AUCKLAND, NEW ZEALAND; AUCKLAND DIABETES CENTRE, GREENLANE CLINICAL CENTRE, AUCKLAND, NEW ZEALAN…	BACKGROUND: IT IS UNCLEAR WHETHER SPECIFIC GUT MICROBIOTA IS ASSOCIATED WITH REMISSION OF TYPE 2 DIABETES (T2D) AFTER DISTINCT TYPES OF BARIATRIC SURGERY. AIMS: THE AIM OF THIS STUDY IS TO EXAMINE GUT MICROBIOTA CHANGES AFTER LAPAROSCOPIC ROUX-EN-Y GASTRIC BYPASS (RYGB) OR SLEEVE GASTRECTOMY (SG) SURGERY IN OBESE PATIENTS WITH T2D. METHODS: WHOLE-METAGENOME SHOTGUN SEQUENCING OF DNA FRAGMENTS USI…			09608923	OBES. SURG.	OBESITY SURGERY	ENGLISH		917 – 925	SPRINGER NEW YORK LLC		234	MURPHY R;TSAI P;JÜLLIG M;LIU A;PLANK L;BOOTH M	10.1007/s11695-016-2399-2	DIFFERENTIAL CHANGES IN GUT MICROBIOTA AFTER GASTRIC BYPASS AND SLEEVE GASTRECTOMY BARIATRIC SURGERY VARY ACCORDING TO DIABETES REMISSION	2	2017	MURPHY RINKI;TSAI PETER;JÜLLIG MIA;LIU AMY;PLANK LINDSAY;BOOTH MICHAEL	R. MURPHY; DEPARTMENT OF MEDICINE, FACULTY OF MEDICAL AND HEALTH SCIENCES, UNIVERSITY OF AUCKLAND, AUCKLAND, PRIVATE BAG, 92019, NEW ZEALAND; EMAIL: R.MURPHY@AUCKLAND.AC.NZ	Bariatric surgery; Gut microbiota; Metagenome shotgun sequencing; Roux-en-Y gastric bypass; Sleeve gastrectomy	UNIVERSITY OF AUCKLAND;UNIVERSITY OF AUCKLAND;UNIVERSITY OF AUCKLAND;AUCKLAND DIABETES CENTRE;UNIVERSITY OF AUCKLAND;NORTH SHORE HOSPITAL	MURPHY R, 2017, OBES SURG	https://www.scopus.com/inward/record.uri?eid=2-s2.0-84991067544&doi=10.1007%2fs11695-016-2399-2&partnerID=40&md5=b483923a22cd656fc1f79a021d18cc17	SCOPUS
EXCESS WEIGHT LOSS; LAPAROSCOPIC ROUX-EN-Y GASTRIC BYPASS; PREOPERATIVE WEIGHT LOSS; ADULT; BODY MASS INDEX; FEMALE; FOLLOW-UP STUDIES; GASTRIC BYPASS; HUMANS; LAPAROSCOPY; MALE; OBESITY; MORBID; POSTOPERATIVE COMPLICATIONS; PREOPERATIVE CARE; PROSPECTIVE STUDIES; RISK FACTORS; TREATMENT OUTCOME; WEIGHT LOSS; ARTICLE; BODY MASS; CLINICAL TRIAL; COMORBIDITY; CONSULTATION; CONTROLLED CLINICAL TRIAL…	ADULT; BODY MASS INDEX; FEMALE; FOLLOW-UP STUDIES; GASTRIC BYPASS; HUMANS; LAPAROSCOPY; MALE; OBESITY; MORBID; POSTOPERATIVE COMPLICATIONS; PREOPERATIVE CARE; PROSPECTIVE STUDIES; RISK FACTORS; TREATMENT OUTCOME; WEIGHT LOSS; ADULT; ARTICLE; BODY MASS; CLINICAL TRIAL; COMORBIDITY; CONSULTATION; CONTROLLED CLINICAL TRIAL; CONTROLLED STUDY; FEMALE; HUMAN; LAPAROSCOPIC SURGERY; LONG TERM CARE; LUNG …	DEPARTMENT OF SURGERY, STANFORD UNIVERSITY SCHOOL OF MEDICINE, STANFORD, CA, UNITED STATES	BACKGROUND: ROUX-EN-Y GASTRIC BYPASS SURGERY IS THE LEADING SURGICAL TREATMENT OF MORBID OBESITY IN THE UNITED STATES. THE ROLE OF PREOPERATIVE WEIGHT LOSS IN GASTRIC BYPASS SURGERY REMAINS CONTROVERSIAL. WE PERFORMED A PROSPECTIVE RANDOMIZED TRIAL TO DETERMINE WHETHER PREOPERATIVE WEIGHT LOSS RESULTS IN BETTER OUTCOMES AFTER LAPAROSCOPIC GASTRIC BYPASS. METHODS: A TOTAL OF 100 PATIENTS UNDERGOIN…			15507289	SURG. OBES. RELAT. DIS.	SURGERY FOR OBESITY AND RELATED DISEASES	ENGLISH		141 – 145			233	ALAMI R;MORTON J;SCHUSTER R;LIE J;SANCHEZ B;PETERS A;CURET M	10.1016/j.soard.2006.11.006	IS THERE A BENEFIT TO PREOPERATIVE WEIGHT LOSS IN GASTRIC BYPASS PATIENTS? A PROSPECTIVE RANDOMIZED TRIAL	1	2007	ALAMI RAMZI S;MORTON JOHN M;SCHUSTER ROB;LIE JIE;SANCHEZ BARRY R;PETERS ANNA;CURET MYRIAM J		Excess weight loss; Laparoscopic Roux-en-Y gastric bypass; Preoperative weight loss	STANFORD UNIVERSITY SCHOOL OF MEDICINE	ALAMI R, 2007, SURG OBES RELAT DIS	https://www.scopus.com/inward/record.uri?eid=2-s2.0-33947418541&doi=10.1016%2fj.soard.2006.11.006&partnerID=40&md5=9d6da91133abd13fdb97a2168bd014b9	SCOPUS
ADOLESCENT; ADULT; BODY MASS INDEX; CARDIOVASCULAR SYSTEM; FEMALE; FOLLOW-UP STUDIES; GASTRIC BYPASS; HUMANS; MALE; PEDIATRIC OBESITY; PROSPECTIVE STUDIES; TREATMENT OUTCOME; YOUNG ADULT; CYANOCOBALAMIN; ADOLESCENT OBESITY; ANEMIA; ARTICLE; BARIATRIC SURGERY; BODY MASS; COMORBIDITY; DYSLIPIDEMIA; ELEVATED BLOOD PRESSURE; FOLLOW UP; GASTROINTESTINAL SURGERY; HUMAN; HYPERPARATHYROIDISM; MORBID OBES…	ADOLESCENT; ADULT; BODY MASS INDEX; CARDIOVASCULAR SYSTEM; FEMALE; FOLLOW-UP STUDIES; GASTRIC BYPASS; HUMANS; MALE; PEDIATRIC OBESITY; PROSPECTIVE STUDIES; TREATMENT OUTCOME; YOUNG ADULT; CYANOCOBALAMIN; ADOLESCENT; ADOLESCENT OBESITY; ADULT; ANEMIA; ARTICLE; BARIATRIC SURGERY; BODY MASS; COMORBIDITY; DYSLIPIDEMIA; ELEVATED BLOOD PRESSURE; FEMALE; FOLLOW UP; GASTROINTESTINAL SURGERY; HUMAN; HYPER…	DIVISION OF PEDIATRIC SURGERY, CINCINNATI CHILDREN'S HOSPITAL MEDICAL CENTER, CINCINNATI, OH, UNITED STATES; DIVISION OF BEHAVIORAL MEDICINE, CINCINNATI CHILDREN'S HOSPITAL MEDICAL CENTER, CINCINNATI, OH, UNITED STATES; DIVISION OF GASTROENTEROLOGY, HEPATOLOGY AND NUTRITION, CINCINNATI CHILDREN'S HOSPITAL MEDICAL CENTER, CINCINNATI, OH, UNITED STATES; DEPARTMENT OF PEDIATRICS, CHILDREN'S HOSPITAL…	BACKGROUND LITTLE IS KNOWN ABOUT THE LONG-TERM OUTCOMES OF BARIATRIC SURGERY FOR SEVERE ADOLESCENT OBESITY, RAISING QUESTIONS ABOUT THE DURABILITY OF EARLY RESPONSES TO SURGERY. WE AIMED TO ANALYSE LONG-TERM (>5 YEARS) OUTCOMES OF ROUX-EN-Y GASTRIC BYPASS IN A COHORT OF YOUNG ADULTS WHO HAD UNDERGONE THE OPERATION DURING ADOLESCENCE, IN THE FOLLOW-UP OF ADOLESCENT BARIATRIC SURGERY AT 5 PLUS YEAR…			22138587	LANCET DIABETES ENDOCRINOL.	THE LANCET DIABETES AND ENDOCRINOLOGY	ENGLISH		165 – 173	LANCET PUBLISHING GROUP		233	INGE T;JENKINS T;XANTHAKOS S;DIXON J;DANIELS S;ZELLER M;HELMRATH M	10.1016/S2213-8587(16)30315-1	LONGTERM OUTCOMES OF BARIATRIC SURGERY IN ADOLESCENTS WITH SEVERE OBESITY (FABS5+): A PROSPECTIVE FOLLOWUP ANALYSIS	1	2017	INGE THOMAS H;JENKINS TODD M;XANTHAKOS STAVRA A;DIXON JOHN B;DANIELS STEPHEN R;ZELLER MEG H;HELMRATH MICHAEL A	T.H. INGE; UNIVERSITY OF COLORADO DENVER SCHOOL OF MEDICINE, AURORA, 80045, UNITED STATES; EMAIL: THOMAS.INGE@CHILDRENSCOLORADO.ORG		CINCINNATI CHILDREN'S HOSPITAL MEDICAL CENTER;CINCINNATI CHILDREN'S HOSPITAL MEDICAL CENTER;CINCINNATI CHILDREN'S HOSPITAL MEDICAL CENTER;CHILDREN'S HOSPITAL COLORADO;BAKER IDI HEART AND DIABETES INSTITUTE	INGE T, 2017, LANCET DIABETES ENDOCRINOL	https://www.scopus.com/inward/record.uri?eid=2-s2.0-85008627421&doi=10.1016%2fS2213-8587%2816%2930315-1&partnerID=40&md5=bdb259a0735b3a6388da2e54874201b5	SCOPUS
ANASTOMOTIC LEAKS; BARIATRIC SURGERY; COMPLICATIONS; DRAINS; GGASTRIC BYPASS; GI RADIOLOGY; MORBID OBESITY; ADULT; ANASTOMOSIS; ROUX-EN-Y; CONTRAST MEDIA; DIATRIZOATE MEGLUMINE; DRAINAGE; FEMALE; GASTRIC BYPASS; HUMANS; MALE; MIDDLE AGED; POSTOPERATIVE PERIOD; PROSPECTIVE STUDIES; ANTIBIOTIC AGENT; AGED; ANASTOMOSIS LEAKAGE; CLINICAL TRIAL; CONFERENCE PAPER; GASTROINTESTINAL RADIOGRAPHY; HUMAN; L…	ADULT; ANASTOMOSIS; ROUX-EN-Y; CONTRAST MEDIA; DIATRIZOATE MEGLUMINE; DRAINAGE; FEMALE; GASTRIC BYPASS; HUMANS; MALE; MIDDLE AGED; POSTOPERATIVE PERIOD; PROSPECTIVE STUDIES; ANTIBIOTIC AGENT; ADULT; AGED; ANASTOMOSIS LEAKAGE; BARIATRIC SURGERY; CLINICAL TRIAL; CONFERENCE PAPER; FEMALE; GASTROINTESTINAL RADIOGRAPHY; HUMAN; LIQUID; MAJOR CLINICAL STUDY; MALE; MORBID OBESITY; POSTOPERATIVE PERIOD; P…	DEPARTMENT OF SURGERY, INTERDISCIPLINARY OBESITY TREATMENT GROUP, UNIVERSITY OF SOUTH FLORIDA, TAMPA, FL, UNITED STATES; DEPARTMENT OF RADIOLOGY, UNIVERSITY OF SOUTH FLORIDA, TAMPA, FL, UNITED STATES	BACKGROUND: THE ROLE OF ROUTINE POST-OPERATIVE CONTRAST EXAMINATION (UGI) AND DRAINAGE OF THE GASTROJEJUNOSTOMY AFTER ROUX-EN-Y GASTRIC BYPASS (RYGBP) IS CONTROVERSIAL. THE AUTHORS DETERMINED IF EARLY ROUTINE POST-OPERATIVE UGI DETECTS OCCULT ANASTOMOTIC LEAKS, THEREBY ALTERING TREATMENT AND WITHHOLDING EARLY FEEDING. METHODS: PROSPECTIVE DATA ON 100 CONSECUTIVE PATIENTS WHO UNDERWENT RYGBP FROM …			09608923	OBES. SURG.	OBESITY SURGERY	ENGLISH		34 – 38			231	SERAFINI F;ANDERSON W;GHASSEMI P;POKLEPOVIC J;MURR M	10.1381/096089203322509237	THE UTILITY OF CONTRAST STUDIES AND DRAINS IN THE MANAGEMENT OF PATIENTS AFTER ROUXENY GASTRIC BYPASS	1	2002	SERAFINI FRANCESCO;ANDERSON WAYNE;GHASSEMI POOPAK;POKLEPOVIC JERRY;MURR MICHEL		Anastomotic leaks; Bariatric surgery; Complications; Drains; Ggastric bypass; GI radiology; Morbid obesity	UNIVERSITY OF SOUTH FLORIDA;UNIVERSITY OF SOUTH FLORIDA	SERAFINI F, 2002, OBES SURG	https://www.scopus.com/inward/record.uri?eid=2-s2.0-0036177430&doi=10.1381%2f096089202321144559&partnerID=40&md5=0400dbc86b00db6ce556d3fe03ce6c38	SCOPUS
ADOLESCENT; ADULT; BLOOD LOSS; SURGICAL; CHI-SQUARE DISTRIBUTION; FEMALE; GASTRIC BYPASS; GASTROPLASTY; HUMANS; LAPAROSCOPY; LENGTH OF STAY; MALE; MIDDLE AGED; OBESITY; MORBID; PATIENT SATISFACTION; POSTOPERATIVE COMPLICATIONS; PROSPECTIVE STUDIES; QUALITY OF LIFE; RISK FACTORS; SEX FACTORS; TIME FACTORS; TREATMENT OUTCOME; WEIGHT LOSS; ARTICLE; BARIATRIC SURGERY; BLEEDING; BODY MASS; CLINICAL TR…	ADOLESCENT; ADULT; BLOOD LOSS; SURGICAL; CHI-SQUARE DISTRIBUTION; FEMALE; GASTRIC BYPASS; GASTROPLASTY; HUMANS; LAPAROSCOPY; LENGTH OF STAY; MALE; MIDDLE AGED; OBESITY; MORBID; PATIENT SATISFACTION; POSTOPERATIVE COMPLICATIONS; PROSPECTIVE STUDIES; QUALITY OF LIFE; RISK FACTORS; SEX FACTORS; TIME FACTORS; TREATMENT OUTCOME; WEIGHT LOSS; ADULT; ARTICLE; BARIATRIC SURGERY; BLEEDING; BODY MASS; CLIN…	DEPARTMENT OF SURGERY, UNIVERSITY OF CALIFORNIA, IRVINE MEDICAL CENTER, ORANGE, CA, UNITED STATES; DEPARTMENT OF SURGERY, BLDG 55, ORANGE, CA 92868, 101 THE CITY DRIVE, UNITED STATES	BACKGROUND: GASTRIC BYPASS AND ADJUSTABLE GASTRIC BANDING ARE THE 2 MOST COMMONLY PERFORMED BARIATRIC PROCEDURES FOR THE TREATMENT OF MORBID OBESITY. THE AIM OF THIS STUDY WAS TO COMPARE THE OUTCOMES, QUALITY OF LIFE, AND COSTS OF LAPAROSCOPIC GASTRIC BYPASS VERSUS LAPAROSCOPIC GASTRIC BANDING. STUDY DESIGN: BETWEEN 2002 AND 2007, 250 PATIENTS WITH A BODY MASS INDEX OF 35 TO 60 KG/M WERE RANDOMLY…			15281140	ANN. SURG.	ANNALS OF SURGERY	ENGLISH		631 – 639			227	NGUYEN N;SLONE J;NGUYEN X;HARTMAN J;HOYT D	10.1097/SLA.0b013e3181b92480	A PROSPECTIVE RANDOMIZED TRIAL OF LAPAROSCOPIC GASTRIC BYPASS VERSUS LAPAROSCOPIC ADJUSTABLE GASTRIC BANDING FOR THE TREATMENT OF MORBID OBESITY: OUTCOMES QUALITY OF LIFE AND COSTS	2	2009	NGUYEN NINH T;SLONE JOHNATHAN A;NGUYEN XUAN-MAI T;HARTMAN JAIMEE S;HOYT DAVID B	N. T. NGUYEN; DEPARTMENT OF SURGERY, BLDG 55, ORANGE, CA 92868, 101 THE CITY DRIVE, UNITED STATES; EMAIL: NINHN@UCI.EDU		UNIVERSITY OF CALIFORNIA	NGUYEN N, 2009, ANN SURG	https://www.scopus.com/inward/record.uri?eid=2-s2.0-70349673328&doi=10.1097%2fSLA.0b013e3181b92480&partnerID=40&md5=787f527b40af9897f5c2689ab8b997bf	SCOPUS
BARIATRIC SURGERY; BARRETTS-ESOPHAGUS; MORBID-OBESITY; ASSOCIATION; MANAGEMENT; OUTCOMES; COMPLICATIONS; GUIDELINES; SYSTEM; COHORT	BARIATRIC SURGERY; BARRETTS-ESOPHAGUS; MORBID-OBESITY; ASSOCIATION; MANAGEMENT; OUTCOMES; COMPLICATIONS; GUIDELINES; SYSTEM; COHORT	SALMINEN, P (CORRESPONDING AUTHOR), POB 52, TURKU 20520, FINLAND.; SALMINEN, PAULINA; GRONROOS, SOFIA; HELMIO, MIKA; OVASKA, JARI, TURKU UNIV HOSP, DIV DIGEST SURG \& UROL, TURKU, FINLAND.; SALMINEN, PAULINA; GRONROOS, SOFIA; HELMIO, MIKA; OVASKA, JARI, UNIV TURKU, DEPT SURG, TURKU, FINLAND.; HURME, SAIJA, UNIV TURKU, DEPT BIOSTAT, TURKU, FINLAND.; JUUTI, ANNE, HELSINKI UNIV HOSP, DEPT ABDOMINAL …	IMPORTANCE LONG-TERM RESULTS FROM RANDOMIZED CLINICAL TRIALS COMPARING LAPAROSCOPIC SLEEVE GASTRECTOMY (LSG) WITH LAPAROSCOPIC ROUX-EN-Y-GASTRIC BYPASS (LRYGB) ARE LIMITED. OBJECTIVE TO COMPARE LONG-TERM OUTCOMES OF WEIGHT LOSS AND REMISSION OF OBESITY-RELATED COMORBIDITIES AND THE PREVALENCE OF GASTROESOPHAGEAL REFLUX SYMPTOMS (GERD), ENDOSCOPIC ESOPHAGITIS, AND BARRETT ESOPHAGUS (BE) AFTER LSG …	330 N WABASH AVE, STE 39300, CHICAGO, IL 60611-5885 USA	UNIVERSITY OF TURKU; UNIVERSITY OF TURKU; UNIVERSITY OF TURKU; UNIVERSITY OF HELSINKI; HELSINKI UNIVERSITY CENTRAL HOSPITAL; UNIVERSITY OF HELSINKI; VAASA CENTRAL HOSPITAL; TAMPERE UNIVERSITY; TAMPERE UNIVERSITY HOSPITAL; SEINAJOKI CENTRAL HOSPITAL; UNIVERSITY OF TURKU; UNIVERSITY OF TURKU	2168-6254	JAMA SURG.	JAMA SURGERY	ENGLISH	NUUTILA, PIRJO/0000-0001-9597-338X SALMINEN, PAULINA/0000-0001-6435-9264	656-666	AMER MEDICAL ASSOC	SURGERY	227	SALMINEN P;GRONROOS S;HELMIO M;HURME S;JUUTI A;JUUSELA R;PEROMAA-HAAVISTO P;LEIVONEN M;NUUTILA P;OVASKA J	10.1001/jamasurg.2022.2229	EFFECT OF LAPAROSCOPIC SLEEVE GASTRECTOMY VS ROUXENY GASTRIC BYPASS ON WEIGHT LOSS COMORBIDITIES AND REFLUX AT 10 YEARS IN ADULT PATIENTS WITH OBESITY THE SLEEVEPASS RANDOMIZED CLINICAL TRIAL	2	2022	SALMINEN PAULINA;GRONROOS SOFIA;HELMIO MIKA;HURME SAIJA;JUUTI ANNE;JUUSELA RISTO;PEROMAA-HAAVISTO PIPSA; LEIVONEN MARJA;NUUTILA PIRJO;OVASKA JARI	SALMINEN, P (CORRESPONDING AUTHOR), POB 52, TURKU 20520, FINLAND		P (CORRESPONDING AUTHOR);TURKU UNIV HOSP;UNIV TURKU;UNIV TURKU;HELSINKI UNIV HOSP;UNIV HELSINKI;VAASA CENT HOSP;TAMPERE UNIV HOSP;SEINAJOKI CENT HOSP;TURKU UNIV HOSP;UNIV TURKU	SALMINEN P, 2022, JAMA SURG		ISI
ADULT; BLOOD GLUCOSE/METABOLISM; DIABETES MELLITUS, TYPE 2/COMPLICATIONS/METABOLISM/SURGERY; FEMALE; GASTRIC BYPASS; GLUCOSE CLAMP TECHNIQUE; HUMANS; INSULIN/METABOLISM; INSULIN RESISTANCE/PHYSIOLOGY; INSULIN SECRETION; INSULIN-SECRETING CELLS/METABOLISM; LIVER/METABOLISM; MALE; MIDDLE AGED; OBESITY/COMPLICATIONS/METABOLISM/SURGERY; POSTPRANDIAL PERIOD	ADULT;BLOOD GLUCOSE/METABOLISM;DIABETES MELLITUS, TYPE 2/COMPLICATIONS/METABOLISM/SURGERY;FEMALE;GASTRIC BYPASS;GLUCOSE CLAMP TECHNIQUE;HUMANS;INSULIN/METABOLISM;INSULIN RESISTANCE/PHYSIOLOGY;INSULIN SECRETION;INSULIN-SECRETING CELLS/METABOLISM;LIVER/METABOLISM;MALE;MIDDLE AGED;OBESITY/COMPLICATIONS/METABOLISM/SURGERY;POSTPRANDIAL PERIOD	DEPARTMENT OF ENDOCRINOLOGY, HVIDOVRE HOSPITAL, HVIDOVRE, DENMARK.;	ROUX-EN-Y GASTRIC BYPASS (RYGB) IMPROVES GLYCEMIC CONTROL WITHIN DAYS AFTER SURGERY, AND CHANGES IN INSULIN SENSITIVITY AND Β-CELL FUNCTION ARE LIKELY TO BE INVOLVED. WE STUDIED 10 OBESE PATIENTS WITH TYPE 2 DIABETES (T2D) AND 10 OBESE GLUCOSE-TOLERANT SUBJECTS BEFORE AND 1 WEEK, 3 MONTHS, AND 1 YEAR AFTER RYGB. PARTICIPANTS WERE INCLUDED AFTER A PREOPERATIVE DIET-INDUCED TOTAL WEIGHT LOSS OF -9.…			1939-327X (ELECTRONIC) 0012-1797 (LINKING)		DIABETES..	ENG		1725-37			224	BOJSEN-MØLLER K;DIRKSEN C;JØRGENSEN N;JACOBSEN S;SERUP A;ALBERS P;HANSEN D;WORM D;NAVER L;KRISTIANSEN V;WOJTASZEWSKI J;KIENS B;HOLST J;RICHTER E;MADSBAD S	10.2337/DB13-1307	EARLY ENHANCEMENTS OF HEPATIC AND LATER OF PERIPHERAL INSULIN SENSITIVITY COMBINED WITH INCREASED POSTPRANDIAL INSULIN SECRETION CONTRIBUTE TO IMPROVED GLYCEMIC CONTROL AFTER ROUXENY GASTRIC BYPASS	1	2014	BOJSEN-MØLLER, KIRSTINE N;DIRKSEN, CARSTEN;JØRGENSEN, NILS B;JACOBSEN, SIV H;SERUP, ANNETTE K;ALBERS, PETER H;HANSEN, DORTE L;WORM, DORTE;NAVER, LARS;KRISTIANSEN, VIGGO B;WOJTASZEWSKI, JØRGEN F P;KIENS, BENTE;HOLST, JENS J;RICHTER, ERIK A;MADSBAD, STEN		Adult;Blood Glucose/metabolism;Diabetes Mellitus, Type 2/complications/metabolism/surgery;Female;Gastric Bypass;Glucose Clamp Technique;Humans;Insulin/metabolism;Insulin Resistance/physiology;Insulin Secretion;Insulin-Secreting Cells/metabolism;Liver/metabolism;Male;Middle Aged;Obesity/complications/metabolism/surgery;Postprandial Period	HVIDOVRE HOSPITAL	BOJSEN-MØLLER K, 2014, DIABETES		PUBMED
BARIATRIC SURGERY; HYPERTENSION; OBESITY; ADULT; ANTIHYPERTENSIVE AGENTS; BLOOD PRESSURE; BODY MASS INDEX; BRAZIL; FEMALE; GASTRIC BYPASS; HUMANS; MALE; MIDDLE AGED; TIME FACTORS; TREATMENT OUTCOME; WEIGHT LOSS; ANGIOTENSIN RECEPTOR ANTAGONIST; BETA ADRENERGIC RECEPTOR BLOCKING AGENT; C REACTIVE PROTEIN; CALCIUM CHANNEL BLOCKING AGENT; CREATININE; DIPEPTIDYL CARBOXYPEPTIDASE INHIBITOR; GLUCOSE; G…	ADULT; ANTIHYPERTENSIVE AGENTS; BLOOD PRESSURE; BODY MASS INDEX; BRAZIL; FEMALE; GASTRIC BYPASS; HUMANS; HYPERTENSION; MALE; MIDDLE AGED; OBESITY; TIME FACTORS; TREATMENT OUTCOME; WEIGHT LOSS; ANGIOTENSIN RECEPTOR ANTAGONIST; BETA ADRENERGIC RECEPTOR BLOCKING AGENT; C REACTIVE PROTEIN; CALCIUM CHANNEL BLOCKING AGENT; CREATININE; DIPEPTIDYL CARBOXYPEPTIDASE INHIBITOR; GLUCOSE; GLYCOSYLATED HEMOGLO…	RESEARCH INSTITUTE, HEART HOSPITAL, ABILIO SOARES STREET, SÃO PAULO, SP, 04004-050, BRAZIL; SURGICAL CENTER, UNITED STATES; INTENSIVE UNIT, HEART HOSPITAL, SÃO PAULO, BRAZIL; OSWALDO CRUZ GERMAN HOSPITAL, SÃO PAULO, BRAZIL; HEART INSTITUTE, HYPERTENSION UNIT, SÃO PAULO, BRAZIL; DEPARTMENT OF HYPERTENSION, DANTE PAZZANESE INSTITUTE OF CARDIOLOGY, SÃO PAULO, BRAZIL	BACKGROUND: RECENT RESEARCH EFFORTS ON BARIATRIC SURGERY HAVE FOCUSED ON METABOLIC AND DIABETES MELLITUS RESOLUTION. RANDOMIZED TRIALS DESIGNED TO ASSESS THE IMPACT OF BARIATRIC SURGERY IN PATIENTS WITH OBESITY AND HYPERTENSION ARE NEEDED. METHODS: IN THIS RANDOMIZED, SINGLE-CENTER, NONBLINDED TRIAL, WE INCLUDED PATIENTS WITH HYPERTENSION (USING =2 MEDICATIONS AT MAXIMUM DOSES OR >2 AT MODERATE D…			00097322	CIRCULATION	CIRCULATION	ENGLISH		1132 – 1142	LIPPINCOTT WILLIAMS AND WILKINS		222	SCHIAVON C;BERSCH-FERREIRA A;SANTUCCI E;OLIVEIRA J;TORREGLOSA C;BUENO P;FRAYHA J;SANTOS R;DAMIANI L;NOUJAIM P;HALPERN H;MONTEIRO F;COHEN R;UCHOA C;DE S M;AMODEO C;BORTOLOTTO L;IKEOKA D;DRAGER L;CAVALCANTI A;BERWANGER O	10.1161/CIRCULATIONAHA.117.032130	EFFECTS OF BARIATRIC SURGERY IN OBESE PATIENTS WITH HYPERTENSION THE GATEWAY RANDOMIZED TRIAL (GASTRIC BYPASS TO TREAT OBESE PATIENTS WITH STEADY HYPERTENSION)	1	2018	SCHIAVON CARLOS AURELIO;BERSCH-FERREIRA ANGELA CRISTINE;SANTUCCI ELIANA VIEIRA;OLIVEIRA JULIANA DANTAS;TORREGLOSA CAMILA RAGNE;BUENO PRISCILA TORRES;FRAYHA JULIA CALDAS;SANTOS RENATO NAKAGAWA;DAMIANI LUCAS PETRI;NOUJAIM PATRICIA MALVINA;HALPERN HELIO;MONTEIRO FREDERICO LJ;COHEN RICARDO VITOR;UCHOA CARLOS H;DE SOUZA MARCIO GONÇALVES;AMODEO CELSO;BORTOLOTTO LUIZ;IKEOKA DIMAS;DRAGER LUCIANO F;CAVALC…	C.A. SCHIAVON; RESEARCH INSTITUTE, HEART HOSPITAL, SÃO PAULO, SP, ABILIO SOARES STREET, 04004-050, BRAZIL; EMAIL: CSCHIAVON@HCOR.COM.BR	Bariatric surgery; Hypertension; Obesity	RESEARCH INSTITUTE;SURGICAL CENTER;HEART HOSPITAL;OSWALDO CRUZ GERMAN HOSPITAL;HEART INSTITUTE;DANTE PAZZANESE INSTITUTE OF CARDIOLOGY	SCHIAVON C, 2018, CIRCULATION	https://www.scopus.com/inward/record.uri?eid=2-s2.0-85046759174&doi=10.1161%2fCIRCULATIONAHA.117.032130&partnerID=40&md5=3003abb4cbd2ace2b795ff9c7c72dd3b	SCOPUS
LONG-TERM MORTALITY; BARIATRIC SURGERY; OBESE-PATIENTS; GLUCOSE CONTROL; INTERVENTION; WEIGHT; THERAPY; COMPLICATIONS; REDUCTION; OUTCOMES	LONG-TERM MORTALITY; BARIATRIC SURGERY; OBESE-PATIENTS; GLUCOSE CONTROL; INTERVENTION; WEIGHT; THERAPY; COMPLICATIONS; REDUCTION; OUTCOMES	GOLDFINE, AB (CORRESPONDING AUTHOR), HARVARD UNIV, SCH MED, JOSLIN DIABET CTR, DIV RES, ONE JOSLIN PL, BOSTON, MA 02215 USA.; HALPERIN, FLORENCIA; SIMONSON, DONALD C., HARVARD UNIV, SCH MED, BRIGHAM \& WOMENS HOSP, DIV ENDOCRINOL DIABET \& HYPERTENS, BOSTON, MA 02215 USA.; PANOSIAN, JENNIFER; GOEBEL-FABBRI, ANN; WEWALKA, MARLENE; HAMDY, OSAMA; ABRAHAMSON, MARTIN; FOSTER, KATHLEEN; GOLDFINE, ALLIS…	IMPORTANCE EMERGING DATA SUPPORT BARIATRIC SURGERY AS A THERAPEUTIC STRATEGY FOR MANAGEMENT OF TYPE 2 DIABETES MELLITUS. OBJECTIVE TO TEST THE FEASIBILITY OF METHODS TO CONDUCT A LARGER MULTISITE TRIAL TO DETERMINE THE LONG-TERM EFFECT OF ROUX-EN-Y GASTRIC BYPASS (RYGB) SURGERY COMPARED WITH AN INTENSIVE DIABETES MEDICAL AND WEIGHT MANAGEMENT (WEIGHT ACHIEVEMENT AND INTENSIVE TREATMENT [WHY WAIT]…	330 N WABASH AVE, STE 39300, CHICAGO, IL 60611-5885 USA	HARVARD UNIVERSITY; HARVARD MEDICAL SCHOOL; HARVARD UNIVERSITY MEDICAL AFFILIATES; BRIGHAM \& WOMEN'S HOSPITAL; HARVARD UNIVERSITY; HARVARD UNIVERSITY MEDICAL AFFILIATES; JOSLIN DIABETES CENTER, INC.; HARVARD MEDICAL SCHOOL; HARVARD UNIVERSITY; HARVARD MEDICAL SCHOOL; HARVARD UNIVERSITY MEDICAL AFFILIATES; BRIGHAM \& WOMEN'S HOSPITAL	2168-6254	JAMA SURG.	JAMA SURGERY	ENGLISH	HAMDY, OSAMA/0000-0002-1919-0268	716-726	AMER MEDICAL ASSOC	SURGERY	221	HALPERIN F;DING S;SIMONSON D;PANOSIAN J;GOEBEL-FABBRI A;WEWALKA M;HAMDY O;ABRAHAMSON M;CLANCY K;FOSTER ;KATHLEEN K;LAUTZ D;VERNON A;GOLDFINE A	10.1001/jamasurg.2014.514	ROUXENY GASTRIC BYPASS SURGERY OR LIFESTYLE WITH INTENSIVE MEDICAL MANAGEMENT IN PATIENTS WITH TYPE 2 DIABETES FEASIBILITY AND 1YEAR RESULTS OF A RANDOMIZED CLINICAL TRIAL	1	2014	HALPERIN FLORENCIA;DING SU-ANN;SIMONSON DONALD C; PANOSIAN JENNIFER;GOEBEL-FABBRI ANN;WEWALKA MARLENE; HAMDY OSAMA;ABRAHAMSON MARTIN;CLANCY KERRI;FOSTER; KATHLEEN;LAUTZ DAVID;VERNON ASHLEY;GOLDFINE ALLISON B	GOLDFINE, AB (CORRESPONDING AUTHOR), HARVARD UNIV, SCH MED, JOSLIN DIABET CTR, DIV RES, ONE JOSLIN PL, BOSTON, MA 02215 USA		HARVARD UNIV;HARVARD UNIV;HARVARD UNIV;HARVARD UNIV	HALPERIN F, 2014, JAMA SURG		ISI
FOOD PREFERENCE; TASTE; AVERSION; GLP-1; GLUCAGON-LIKE PEPTIDE-1; VERTICAL BANDED GASTROPLASTY; RANDOMIZED; CLINICAL-TRIAL; BARIATRIC SURGERY; SWEET TASTE; WEIGHT-LOSS; ENERGY-EXPENDITURE; NERVE TRANSECTION; DIETARY-INTAKE; OBESE SUBJECTS	VERTICAL BANDED GASTROPLASTY; GLUCAGON-LIKE PEPTIDE-1; RANDOMIZED; CLINICAL-TRIAL; BARIATRIC SURGERY; SWEET TASTE; WEIGHT-LOSS; ENERGY-EXPENDITURE; NERVE TRANSECTION; DIETARY-INTAKE; OBESE SUBJECTS	LE ROUX, CW (CORRESPONDING AUTHOR), UNIV LONDON IMPERIAL COLL SCI TECHNOL \& MED, HAMMERSMITH HOSP, DEPT INVEST MED, DU CANE RD, LONDON W12 0NN, ENGLAND.; LE ROUX, CAREL W.; BUETER, MARCO; BLOOM, STEPHEN R.; OLBERS, TORSTEN, UNIV LONDON IMPERIAL COLL SCI TECHNOL \& MED, IMPERIAL WEIGHT CTR, DEPT INVEST MED, LONDON W12 0NN, ENGLAND.; BUETER, MARCO, UNIV ZURICH HOSP, DEPT SURG, CH-8091 ZURICH, SWIT…	LE ROUX CW, BUETER M, THEIS N, WERLING M, ASHRAFIAN H, LOWENSTEIN C, ATHANASIOU T, BLOOM SR, SPECTOR AC, OLBERS T, LUTZ TA. GASTRIC BYPASS REDUCES FAT INTAKE AND PREFERENCE. AM J PHYSIOL REGUL INTEGR COMP PHYSIOL 301: R1057-R1066, 2011. FIRST PUBLISHED JULY 6, 2011; DOI:10.1152/AJPREGU.00139.2011.-ROUXEN- Y GASTRIC BYPASS IS THE MOST EFFECTIVE THERAPY FOR MORBID OBESITY. THIS STUDY INVESTIGATED H…	9650 ROCKVILLE PIKE, BETHESDA, MD 20814 USA	IMPERIAL COLLEGE LONDON; UNIVERSITY OF ZURICH; UNIVERSITY ZURICH HOSPITAL; UNIVERSITY OF ZURICH; UNIVERSITY OF ZURICH; ZURICH CENTER INTEGRATIVE HUMAN PHYSIOLOGY (ZIHP); IMPERIAL COLLEGE LONDON; STATE UNIVERSITY SYSTEM OF FLORIDA; FLORIDA STATE UNIVERSITY; STATE UNIVERSITY SYSTEM OF FLORIDA; FLORIDA STATE UNIVERSITY	0363-6119	AM. J. PHYSIOL.-REGUL. INTEGR. COMP. PHYSIOL.	AMERICAN JOURNAL OF PHYSIOLOGY-REGULATORY INTEGRATIVE AND COMPARATIVE PHYSIOLOGY	ENGLISH	ASHRAFIAN, HUTAN/0000-0003-1668-0672 LUTZ, THOMAS/0000-0002-5056-8548 LE ROUX, CAREL/0000-0001-5521-5445 OLBERS, TORSTEN/0000-0002-7218-3390	R1057-R1066	AMER PHYSIOLOGICAL SOC	PHYSIOLOGY	217	LE R C;BUETER M;THEIS N;WERLING M;ASHRAFIAN H;LOEWENSTEIN C;ATHANASIOU T;BLOOM S;SPECTOR A;OLBERS T;LUTZ ;THOMAS A T	10.1152/ajpregu.00139.2011	GASTRIC BYPASS REDUCES FAT INTAKE AND PREFERENCE	1	2011	LE ROUX CAREL W;BUETER MARCO;THEIS NADINE;WERLING MALIN;ASHRAFIAN HUTAN;LOEWENSTEIN CHRISTIAN;ATHANASIOU THANOS;BLOOM STEPHEN R;SPECTOR ALAN C;OLBERS TORSTEN;LUTZ; THOMAS A	LE ROUX, CW (CORRESPONDING AUTHOR), UNIV LONDON IMPERIAL COLL SCI TECHNOL \& MED, HAMMERSMITH HOSP, DEPT INVEST MED, DU CANE RD, LONDON W12 0NN, ENGLAND	food preference; taste; aversion; GLP-1; glucagon-like peptide-1	UNIV LONDON IMPERIAL COLL SCI TECHNOL AND MED;UNIV LONDON IMPERIAL COLL SCI TECHNOL AND MED;UNIV ZURICH HOSP;UNIV ZURICH;UNIV ZURICH;UNIV LONDON IMPERIAL COLL SCI TECHNOL AND MED;FLORIDA STATE UNIV;FLORIDA STATE UNIV	LE R C, 2011, AM J PHYSIOL-REGUL INTEGR COMP PHYSIOL		ISI
ADIPOKINES; ADULT; BLOOD GLUCOSE; CALORIC RESTRICTION; COMBINED MODALITY THERAPY; EATING; FASTING; FEMALE; GASTRIC BYPASS; GASTRIC INHIBITORY POLYPEPTIDE; GLUCAGON-LIKE PEPTIDE 1; HOMEOSTASIS; HUMANS; INSULIN RESISTANCE; MALE; MIDDLE AGED; OBESITY; MORBID; POSTOPERATIVE PERIOD; WEIGHT LOSS; GLUCAGON LIKE PEPTIDE 1; GLUCOSE; INCRETIN; INSULIN; LEPTIN; ADIPOCYTOKINE; ARTICLE; CLINICAL ARTICLE; CLIN…	ADIPOKINES; ADULT; BLOOD GLUCOSE; CALORIC RESTRICTION; COMBINED MODALITY THERAPY; EATING; FASTING; FEMALE; GASTRIC BYPASS; GASTRIC INHIBITORY POLYPEPTIDE; GLUCAGON-LIKE PEPTIDE 1; HOMEOSTASIS; HUMANS; INSULIN RESISTANCE; MALE; MIDDLE AGED; OBESITY; MORBID; POSTOPERATIVE PERIOD; WEIGHT LOSS; GLUCAGON LIKE PEPTIDE 1; GLUCOSE; INCRETIN; INSULIN; LEPTIN; ADIPOCYTOKINE; GASTRIC INHIBITORY POLYPEPTIDE;…	DEPARTMENT OF SURGERY, VANDERBILT UNIVERSITY SCHOOL OF MEDICINE, NASHVILLE, TN, UNITED STATES; DEPARTMENT OF MEDICINE, VANDERBILT UNIVERSITY SCHOOL OF MEDICINE, NASHVILLE, TN, UNITED STATES; DEPARTMENT OF BIOSTATISTICS, VANDERBILT UNIVERSITY SCHOOL OF MEDICINE, NASHVILLE, TN, UNITED STATES	OBJECTIVE - MANY OF THE METABOLIC BENEFITS OF ROUX-EN-Y GASTRIC BYPASS (RYGB) OCCUR BEFORE WEIGHT LOSS. IN THIS STUDY WE INVESTIGATED THE INFLUENCE OF CALORIC RESTRICTION ON THE IMPROVEMENTS IN THE METABOLIC RESPONSES THAT OCCUR WITHIN THE 1ST WEEK AFTER RYGB. RESEARCH METHODS AND DESIGN - A MIXED MEAL WAS ADMINISTERED TO NINE SUBJECTS BEFORE AND AFTER RYGB (AVERAGE 4 ± 0.5 DAYS) AND TO NINE MATC…			19355548	DIABETES CARE	DIABETES CARE	ENGLISH		1438 – 1442			215	ISBELL J;TAMBOLI R;HANSEN E;SALIBA J;DUNN J;PHILLIPS S;MARKS-SHULMAN P;ABUMRAD N	10.2337/dc09-2107	THE IMPORTANCE OF CALORIC RESTRICTION IN THE EARLY IMPROVEMENTS IN INSULIN SENSITIVITY AFTER ROUXENY GASTRIC BYPASS SURGERY	1	2010	ISBELL JAMES M;TAMBOLI ROBYN A;HANSEN ERIK N;SALIBA JABBAR;DUNN JULIA P;PHILLIPS SHARON E;MARKS-SHULMAN PAMELA A;ABUMRAD NAJI N	N. N. ABUMRAD; DEPARTMENT OF SURGERY, VANDERBILT UNIVERSITY SCHOOL OF MEDICINE, NASHVILLE, TN, UNITED STATES; EMAIL: NAJI.ABUMRAD@VANDERBILT.EDU		VANDERBILT UNIVERSITY SCHOOL OF MEDICINE;VANDERBILT UNIVERSITY SCHOOL OF MEDICINE;VANDERBILT UNIVERSITY SCHOOL OF MEDICINE	ISBELL J, 2010, DIABETES CARE	https://www.scopus.com/inward/record.uri?eid=2-s2.0-77958187114&doi=10.2337%2fdc09-2107&partnerID=40&md5=00cc4f6ac4bdc4d0b5021112c491f526	SCOPUS
ADULT; ANALGESIA; ARTICLE; CLINICAL TRIAL; CONTROLLED CLINICAL TRIAL; CONTROLLED STUDY; FEMALE; HUMAN; LAPAROSCOPIC SURGERY; LUNG FUNCTION; MAJOR CLINICAL STUDY; MALE; PAIN ASSESSMENT; POSTOPERATIVE PAIN; POSTOPERATIVE PERIOD; PRIORITY JOURNAL; RANDOMIZED CONTROLLED TRIAL; STOMACH BYPASS	ADULT; ANALGESIA; ARTICLE; CLINICAL TRIAL; CONTROLLED CLINICAL TRIAL; CONTROLLED STUDY; FEMALE; HUMAN; LAPAROSCOPIC SURGERY; LUNG FUNCTION; MAJOR CLINICAL STUDY; MALE; PAIN ASSESSMENT; POSTOPERATIVE PAIN; POSTOPERATIVE PERIOD; PRIORITY JOURNAL; RANDOMIZED CONTROLLED TRIAL; STOMACH BYPASS	DEPARTMENT OF SURGERY, UNIVERSITY OF CALIFORNIA, DAVIS, MEDICAL CENTER, SACRAMENTO, CA, UNITED STATES; DEPARTMENT OF ANESTHESIOLOGY, UNIVERSITY OF CALIFORNIA, DAVIS, MEDICAL CENTER, SACRAMENTO, CA, UNITED STATES; DEPARTMENT OF RADIOLOGY, UNIVERSITY OF CALIFORNIA, DAVIS, MEDICAL CENTER, SACRAMENTO, CA, UNITED STATES; DEPARTMENT OF SURGERY, SACRAMENTO, CA 95817-1814, 2221 STOCKTON BLVD, 3RD FLOOR, …	BACKGROUND: IMPAIRMENT OF PULMONARY FUNCTION IS COMMON AFTER UPPER ABDOMINAL OPERATIONS. THE PURPOSE OF THIS STUDY WAS TO COMPARE POSTOPERATIVE PULMONARY FUNCTION AND ANALGESIC REQUIREMENTS IN PATIENTS UNDERGOING EITHER LAPAROSCOPIC OR OPEN ROUX-EN-Y GASTRIC BYPASS (GBP). STUDY DESIGN: SEVENTY PATIENTS WITH A BODY MASS INDEX OF 40 TO 60 KG/M2 WERE RANDOMLY ASSIGNED TO UNDERGO LAPAROSCOPIC (N = 36…			10727515	J. AM. COLL. SURG.	JOURNAL OF THE AMERICAN COLLEGE OF SURGEONS	ENGLISH		469 – 476	AMERICAN COLLEGE OF SURGEONS		214	NGUYEN N;LEE S;GOLDMAN C;FLEMING N;ARANGO A;MCFALL R;WOLFE B	10.1016/S1072-7515(01)00822-5	COMPARISON OF PULMONARY FUNCTION AND POSTOPERATIVE PAIN AFTER LAPAROSCOPIC VERSUS OPEN GASTRIC BYPASS: A RANDOMIZED TRIAL	1	2001	NGUYEN NINH T;LEE STEVEN L;GOLDMAN CHARLES;FLEMING NEAL;ARANGO ANDRES;MCFALL RUSSELL;WOLFE BRUCE M			UNIVERSITY OF CALIFORNIA;UNIVERSITY OF CALIFORNIA;UNIVERSITY OF CALIFORNIA	NGUYEN N, 2001, J AM COLL SURG	https://www.scopus.com/inward/record.uri?eid=2-s2.0-0035074877&doi=10.1016%2fS1072-7515%2801%2900822-5&partnerID=40&md5=9a6c49e02fb4b9bcc530d4ec99384a9b	SCOPUS
CO-MORBIDITY; COMPLICATIONS; GASTRIC BYPASS; LAP-BAND; PROSPECTIVE RANDOMIZED STUDY; WEIGHT LOSS; ADULT; BODY MASS INDEX; FEMALE; FOLLOW-UP STUDIES; GASTROPLASTY; HUMANS; LAPAROSCOPY; LENGTH OF STAY; MALE; MIDDLE AGED; OBESITY; MORBID; POSTOPERATIVE COMPLICATIONS; PROSPECTIVE STUDIES; TREATMENT OUTCOME; ACUTE ABDOMEN; ARTICLE; BILIOPANCREATIC BYPASS; BODY MASS; BODY WEIGHT; CLINICAL TRIAL; COMORB…	ADULT; BODY MASS INDEX; FEMALE; FOLLOW-UP STUDIES; GASTRIC BYPASS; GASTROPLASTY; HUMANS; LAPAROSCOPY; LENGTH OF STAY; MALE; MIDDLE AGED; OBESITY; MORBID; POSTOPERATIVE COMPLICATIONS; PROSPECTIVE STUDIES; TREATMENT OUTCOME; WEIGHT LOSS; ACUTE ABDOMEN; ADULT; ARTICLE; BILIOPANCREATIC BYPASS; BODY MASS; BODY WEIGHT; CLINICAL TRIAL; COMORBIDITY; CONTROLLED CLINICAL TRIAL; CONTROLLED STUDY; FATALITY; …	S. GIOVANNI BOSCO HOSPITAL, NAPLES, ITALY	BACKGROUND: TO PERFORM A PROSPECTIVE, RANDOMIZED COMPARISON OF LAPAROSCOPIC ADJUSTABLE GASTRIC BANDING (LAGB) AND LAPAROSCOPIC ROUX-EN-Y GASTRIC BYPASS (LRYGB). METHODS: LAGB, USING THE PARS FLACCIDA TECHNIQUE, AND STANDARD LRYGB WERE PERFORMED. FROM JANUARY 2000 TO NOVEMBER 2000, 51 PATIENTS (MEAN AGE 34.0 ± 8.9 YEARS, RANGE 20-49) WERE RANDOMLY ALLOCATED TO UNDERGO EITHER LAGB (N = 27, 5 MEN AN…			15507289	SURG. OBES. RELAT. DIS.	SURGERY FOR OBESITY AND RELATED DISEASES	ENGLISH		127 – 132			212	ANGRISANI L;LORENZO M;BORRELLI V	10.1016/j.soard.2006.12.005	LAPAROSCOPIC ADJUSTABLE GASTRIC BANDING VERSUS ROUXENY GASTRIC BYPASS: 5YEAR RESULTS OF A PROSPECTIVE RANDOMIZED TRIAL	2	2007	ANGRISANI LUIGI;LORENZO MICHELE;BORRELLI VINCENZO	L. ANGRISANI; S. GIOVANNI BOSCO HOSPITAL, NAPLES, ITALY; EMAIL: LUIGIANGRISANI@CHIRURGIAOBESITA.IT	Co-morbidity; Complications; Gastric bypass; Lap-Band; Prospective randomized study; Weight loss	S. GIOVANNI BOSCO HOSPITAL	ANGRISANI L, 2007, SURG OBES RELAT DIS	https://www.scopus.com/inward/record.uri?eid=2-s2.0-33947362934&doi=10.1016%2fj.soard.2006.12.005&partnerID=40&md5=33664af02f84d971ae5b137629c89bb5	SCOPUS
ADULT; CALORIC RESTRICTION; FEMALE; FOLLOW-UP STUDIES; GASTRIC BYPASS; HUMANS; LAPAROSCOPY; MALE; OBESITY; MORBID; POSTOPERATIVE COMPLICATIONS; PREOPERATIVE CARE; PROGNOSIS; PROSPECTIVE STUDIES; SINGLE-BLIND METHOD; WEIGHT LOSS; ARTICLE; CONTROLLED STUDY; DIET RESTRICTION; HUMAN; LAPAROSCOPIC SURGERY; LOW CALORY DIET; MAJOR CLINICAL STUDY; MORBIDITY; MULTICENTER STUDY; OPERATION DURATION; OUTCOME…	ADULT; CALORIC RESTRICTION; FEMALE; FOLLOW-UP STUDIES; GASTRIC BYPASS; HUMANS; LAPAROSCOPY; MALE; OBESITY; MORBID; POSTOPERATIVE COMPLICATIONS; PREOPERATIVE CARE; PROGNOSIS; PROSPECTIVE STUDIES; SINGLE-BLIND METHOD; WEIGHT LOSS; ADULT; ARTICLE; CONTROLLED STUDY; DIET RESTRICTION; FEMALE; HUMAN; LAPAROSCOPIC SURGERY; LOW CALORY DIET; MAJOR CLINICAL STUDY; MALE; MORBIDITY; MULTICENTER STUDY; OBESIT…	DEPARTMENT OF GASTROINTESTINAL SURGERY, UNIVERSITY HOSPITAL GHENT, 9000 GHENT, DE PINTELAAN 185, BELGIUM; DEPARTMENT OF SURGERY, KAUNAS UNIVERSITY OF MEDICINE HOSPITAL, KAUNAS, LITHUANIA; SERVICE OF GENERAL SURGERY, HOSPITAL GENERAL UNIVERSITARIO J. M. MORALES MESEGUER, MURCIA, SPAIN; DEPARTMENT OF GENERAL SURGERY, MAXIMA MEDISCH CENTRUM, LOCATIE EINDHOVEN, EINDHOVEN, NETHERLANDS; DEPARTMENT OF S…	HYPOTHESIS: A 14-DAY VERY LOW-CALORIE DIET (VLCD) REGIMEN BEFORE A LAPAROSCOPIC GASTRIC BYPASS PROCEDURE WILL IMPROVE PERIOPERATIVE AND POSTOPERATIVE OUTCOMES. DESIGN: MULTICENTER, RANDOMIZED, SINGLE-BLIND STUDY. SETTING: FIVE HIGH-VOLUME BARIATRIC CENTERS IN SWEDEN, THE NETHERLANDS, LITHUANIA, SPAIN, AND BELGIUM. PATIENTS: TWO HUNDRED NINETY-EIGHT MORBIDLY OBESE PATIENTS UNDERGOING LAPAROSCOPIC …			15383644	ARCH. SURG.	ARCHIVES OF SURGERY	ENGLISH		1300 – 1305			211	VAN N Y;DAMBRAUSKAS Z;CAMPILLO-SOTO A;VAN D F;WIEZER R;JANSSEN I;KRAMER M;THORELL A	10.1001/archsurg.2011.273	PREOPERATIVE VERY LOWCALORIE DIET AND OPERATIVE OUTCOME AFTER LAPAROSCOPIC GASTRIC BYPASS: A RANDOMIZED MULTICENTER STUDY	1	2011	VAN NIEUWENHOVE YVES;DAMBRAUSKAS ZILVINAS;CAMPILLO-SOTO ALVARO;VAN DIELEN FRANCOIS;WIEZER RENÉ;JANSSEN IGNACE;KRAMER MICHAEL;THORELL ANDERS	Y. VAN NIEUWENHOVE; DEPARTMENT OF GASTROINTESTINAL SURGERY, UNIVERSITY HOSPITAL GHENT, 9000 GHENT, DE PINTELAAN 185, BELGIUM; EMAIL: YVES.VANNIEUWENHOVE@UGENT.BE		UNIVERSITY HOSPITAL GHENT;KAUNAS UNIVERSITY OF MEDICINE HOSPITAL;HOSPITAL GENERAL UNIVERSITARIO J. M. MORALES MESEGUER;MAXIMA MEDISCH CENTRUM;SINT ANTONIUS HOSPITAL NIEUWEGEIN;UNIVERSITY OF MUNICH;KAROLINSKA INSTITUTET	VAN N Y, 2011, ARCH SURG	https://www.scopus.com/inward/record.uri?eid=2-s2.0-81855194826&doi=10.1001%2farchsurg.2011.273&partnerID=40&md5=07e908f9d00c4ac6a250a9ea7d922588	SCOPUS
BIOPSY; BODY MASS INDEX; FEMALE; GASTRIC BYPASS/METHODS; GASTROPLASTY/METHODS; HUMANS; LONGITUDINAL STUDIES; MALE; MIDDLE AGED; NON-ALCOHOLIC FATTY LIVER DISEASE/ETIOLOGY/SURGERY; OBESITY, MORBID/COMPLICATIONS/SURGERY; PROSPECTIVE STUDIES; TREATMENT OUTCOME	BIOPSY;BODY MASS INDEX;FEMALE;GASTRIC BYPASS/METHODS;GASTROPLASTY/METHODS;HUMANS;LONGITUDINAL STUDIES;MALE;MIDDLE AGED;NON-ALCOHOLIC FATTY LIVER DISEASE/ETIOLOGY/SURGERY;OBESITY, MORBID/COMPLICATIONS/SURGERY;PROSPECTIVE STUDIES;TREATMENT OUTCOME	*GENERAL AND ENDOCRINE SURGERY, LILLE UNIVERSITY HOSPITAL, LILLE, FRANCE †INSERM U 859, EUROPEAN GENOMIC INSTITUTE FOR DIABETES, LILLE UNIVERSITY, LILLE, FRANCE ‡HEPATHOLOGY, LILLE UNIVERSITY HOSPITAL, LILLE, FRANCE §INSERM U 995, LILLE, FRANCE ¶PATHOLOGY, LILLE UNIVERSITY HOSPITAL, INSERM U 837, LILLE, FRANCE ‖NUTRITION, LILLE UNIVERSITY HOSPITAL, LILLE, FRANCE.;	OBJECTIVES: TO COMPARE THE LONG-TERM BENEFIT OF GASTRIC BYPASS [ROUX-EN-Y GASTRIC BYPASS (RYGB)] VERSUS ADJUSTABLE GASTRIC BANDING (AGB) ON NONALCOHOLIC FATTY LIVER DISEASE (NAFLD) IN SEVERELY OBESE PATIENTS. BACKGROUND: NAFLD IMPROVES AFTER WEIGHT LOSS SURGERY, BUT NO HISTOLOGICAL STUDY HAS COMPARED THE EFFECTS OF THE VARIOUS BARIATRIC INTERVENTIONS. METHODS: PARTICIPANTS CONSISTED OF 1236 OBESE…			1528-1140 (ELECTRONIC) 0003-4932 (LINKING)		ANNALS OF SURGERY	ENG		893-8; DISCUSSION 898-9			208	CAIAZZO R;LASSAILLY G;LETEURTRE E;BAUD G;VERKINDT H;RAVERDY V;BUOB D;PIGEYRE M;MATHURIN P;PATTOU F	10.1097/SLA.0000000000000945	ROUXENY GASTRIC BYPASS VERSUS ADJUSTABLE GASTRIC BANDING TO REDUCE NONALCOHOLIC FATTY LIVER DISEASE: A 5YEAR CONTROLLED LONGITUDINAL STUDY	1	2014	CAIAZZO, ROBERT;LASSAILLY, GUILLAUME;LETEURTRE, EMMANUELLE;BAUD, GREGORY;VERKINDT, HÉLÈNE;RAVERDY, VIOLETA;BUOB, DAVID;PIGEYRE, MARIE;MATHURIN, PHILIPPE;PATTOU, FRANÇOIS		Biopsy;Body Mass Index;Female;Gastric Bypass/methods;Gastroplasty/methods;Humans;Longitudinal Studies;Male;Middle Aged;Non-alcoholic Fatty Liver Disease/etiology/surgery;Obesity, Morbid/complications/surgery;Prospective Studies;Treatment Outcome	LILLE UNIVERSITY HOSPITAL	CAIAZZO R, 2014, ANN SURG		PUBMED
METABOLIC SURGERY; BARIATRIC SURGERY; BMI UNDER 35; DIABETES; OBESITY; SRAGE; BIOMARKER; GASTRIC BYPASS; SLEEVE; BAND; RANDOMIZED-CONTROLLED-TRIAL; SLEEVE GASTRECTOMY; INFLAMMATORY RESPONSE; CLINICAL-TRIAL; NIH CRITERIA; RAGE; MELLITUS; HYPERTENSION	RANDOMIZED-CONTROLLED-TRIAL; BARIATRIC SURGERY; SLEEVE GASTRECTOMY; INFLAMMATORY RESPONSE; GASTRIC BYPASS; CLINICAL-TRIAL; NIH CRITERIA; RAGE; MELLITUS; HYPERTENSION	PARIKH, M (CORRESPONDING AUTHOR), NYU, LANGONE MED CTR, DEPT SURG, BELLEVUE HOSP CTR, 550 FIRST AVE NB 15 SOUTH 7, NEW YORK, NY 10016 USA.; HORWITZ, DANIEL; SAUNDERS, JOHN K.; UDE-WELCOME, AKU; SCHMIDT, ANN MARIE; PACHTER, H. LEON; PARIKH, MANISH, NYU, SCH MED, DEPT SURG, BELLEVUE HOSP, NEW YORK, NY USA.; DUNN, VAN, HLTH \& HOSP CORP, METROPLUS HLTH PLAN, NEW YORK, NY USA.	BACKGROUND: PATIENTS WITH TYPE 2 DIABETES (T2D) AND BODY MASS INDEX (BMI) <35 MAY BENEFIT FROM METABOLIC SURGERY. THE SOLUBLE FORM OF THE RECEPTOR FOR ADVANCED GLYCATION END PRODUCTS (SRAGE) MAY IDENTIFY PATIENTS AT GREATER CHANCE FOR T2D REMISSION. OBJECTIVES: TO STUDY LONG-TERM OUTCOMES OF PATIENTS WITH T2D AND BMI 30-35 TREATED WITH METABOLIC SURGERY OR MEDICAL WEIGHT MANAGEMENT (MWM) AND SEAR…	360 PARK AVE SOUTH, NEW YORK, NY 10010-1710 USA	BELLEVUE HOSPITAL CENTER; NEW YORK UNIVERSITY	1550-7289	SURG. OBES. RELAT. DIS.	SURGERY FOR OBESITY AND RELATED DISEASES	ENGLISH	PARIKH, MANISH/0000-0002-8612-5407	1337-1341	ELSEVIER SCIENCE INC	SURGERY	207	HORWITZ D;SAUNDERS J;UDE-WELCOME A;SCHMIDT ;ANN M A;DUNN V;PACHTER H;PARIKH M	10.1097/01.sla.0000197381.01214.76	THREEYEAR FOLLOWUP COMPARING METABOLIC SURGERY VERSUS MEDICAL WEIGHT MANAGEMENT IN PATIENTS WITH TYPE 2 DIABETES AND BMI 3035 THE ROLE OF SRAGE BIOMARKER AS PREDICTOR OF SATISFACTORY OUTCOMES	1	2016	HORWITZ DANIEL;SAUNDERS JOHN K;UDE-WELCOME AKU;SCHMIDT; ANN MARIE;DUNN VAN;PACHTER H LEON;PARIKH MANISH	PARIKH, M (CORRESPONDING AUTHOR), NYU, LANGONE MED CTR, DEPT SURG, BELLEVUE HOSP CTR, 550 FIRST AVE NB 15 SOUTH 7, NEW YORK, NY 10016 USA	Metabolic surgery; Bariatric surgery; BMI under 35; Diabetes; Obesity; SRAGE; Biomarker; Gastric bypass; Sleeve; Band	LANGONE MED CTR;SCHMIDT;SCH MED;HLTH AND HOSP CORP	HORWITZ D, 2016, SURG OBES RELAT DIS		ISI
ADULT; ANALYSIS OF VARIANCE; CHI-SQUARE DISTRIBUTION; COMORBIDITY; FOLLOW-UP STUDIES; GASTRIC BYPASS; HUMANS; LAPAROSCOPY; LENGTH OF STAY; MIDDLE AGED; OBESITY; MORBID; PAIN; POSTOPERATIVE; POSTOPERATIVE COMPLICATIONS; PROSPECTIVE STUDIES; QUALITY OF LIFE; STATISTICS; NONPARAMETRIC; TREATMENT OUTCOME; WEIGHT LOSS; ARTICLE; CHOLECYSTECTOMY; CLINICAL TRIAL; CONTROLLED CLINICAL TRIAL; CONTROLLED STU…	ADULT; ANALYSIS OF VARIANCE; CHI-SQUARE DISTRIBUTION; COMORBIDITY; FOLLOW-UP STUDIES; GASTRIC BYPASS; HUMANS; LAPAROSCOPY; LENGTH OF STAY; MIDDLE AGED; OBESITY; MORBID; PAIN; POSTOPERATIVE; POSTOPERATIVE COMPLICATIONS; PROSPECTIVE STUDIES; QUALITY OF LIFE; STATISTICS; NONPARAMETRIC; TREATMENT OUTCOME; WEIGHT LOSS; ADULT; ARTICLE; CHOLECYSTECTOMY; CLINICAL TRIAL; COMORBIDITY; CONTROLLED CLINICAL T…	DEPARTMENT OF SURGERY, UNIVERSITY OF CALIFORNIA, DAVIS MEDICAL CENTER, SACRAMENTO, CA, UNITED STATES; DEPARTMENT OF SURGERY, UNIVERSITY OF CALIFORNIA, IRVINE MEDICAL CENTER, ORANGE, CA, UNITED STATES; DEPARTMENT OF SURGERY, BLDG. 55, ORANGE, CA 92868, 101 THE CITY DRIVE, UNITED STATES	OBJECTIVE: TO ANALYZE LONG-TERM WEIGHT LOSS, CHANGES IN COMORBIDITIES AND QUALITY OF LIFE, AND LATE COMPLICATIONS AFTER LAPAROSCOPIC AND OPEN GASTRIC BYPASS. SUMMARY BACKGROUND DATA: EARLY RESULTS FROM OUR PROSPECTIVE RANDOMIZED TRIAL COMPARING THE OUTCOME OF LAPAROSCOPIC VERSUS OPEN GASTRIC BYPASS DEMONSTRATED LESS POSTOPERATIVE PAIN, SHORTER LENGTH OF HOSPITAL STAY, FEWER WOUND-RELATED COMPLICA…			00034932	ANN. SURG.	ANNALS OF SURGERY	ENGLISH		181 – 188			205	PUZZIFERRI N;AUSTRHEIM-SMITH I;WOLFE B;WILSON S;NGUYEN N	10.1016/j.soard.2020.11.019	THREEYEAR FOLLOWUP OF A PROSPECTIVE RANDOMIZED TRIAL COMPARING LAPAROSCOPIC VERSUS OPEN GASTRIC BYPASS	1	2006	PUZZIFERRI NANCY;AUSTRHEIM-SMITH ISELIN T;WOLFE BRUCE M;WILSON SAMUEL E;NGUYEN NINH T	N.T. NGUYEN; DEPARTMENT OF SURGERY, BLDG. 55, ORANGE, CA 92868, 101 THE CITY DRIVE, UNITED STATES; EMAIL: NINHN@UCI.EDU		UNIVERSITY OF CALIFORNIA;UNIVERSITY OF CALIFORNIA	PUZZIFERRI N, 2006, ANN SURG	https://www.scopus.com/inward/record.uri?eid=2-s2.0-31844436246&doi=10.1097%2f01.sla.0000197381.01214.76&partnerID=40&md5=c6d22a993c11fada56143146328546b4	SCOPUS
ADULT; ARTICLE; BARIATRIC SURGERY; BODY MASS; CLINICAL TRIAL; CONTROLLED STUDY; HUMAN; HYPERTENSION; HYPOVENTILATION; LUNG EMBOLISM; MAJOR CLINICAL STUDY; MEDICAL RECORD REVIEW; MORBID OBESITY; MORTALITY; MULTICENTER STUDY; OBESITY; PRIORITY JOURNAL; PULMONARY HYPERTENSION; RISK FACTOR; SCORING SYSTEM; SEX RATIO; STOMACH BYPASS; THROMBOEMBOLISM; VALIDATION STUDY; VENA CAVA FILTER	ADULT; ARTICLE; BARIATRIC SURGERY; BODY MASS; CLINICAL TRIAL; CONTROLLED STUDY; HUMAN; HYPERTENSION; HYPOVENTILATION; LUNG EMBOLISM; MAJOR CLINICAL STUDY; MEDICAL RECORD REVIEW; MORBID OBESITY; MORTALITY; MULTICENTER STUDY; OBESITY; PRIORITY JOURNAL; PULMONARY HYPERTENSION; RISK FACTOR; SCORING SYSTEM; SEX RATIO; STOMACH BYPASS; THROMBOEMBOLISM; VALIDATION STUDY; VENA CAVA FILTER	DEPARTMENT OF SURGERY, DUKE UNIVERSITY MEDICAL CENTER, DURHAM, NC, UNITED STATES; DEPARTMENT OF SURGERY, VIRGINIA COMMONWEALTH UNIVERSITY, RICHMOND, VA, UNITED STATES; DEPARTMENT OF SURGERY, UNIVERSITY OF SOUTH FLORIDA, TAMPA, FL, UNITED STATES; DEPARTMENT OF SURGERY, MEDICAL UNIVERSITY OF SOUTH CAROLINA, CHARLESTON, SC, UNITED STATES; DUKE UNIVERSITY MEDICAL CENTER, DUMC-3288, DURHAM, NC 27710, …	BACKGROUND: A SCORING SYSTEM FOR CLINICAL ASSESSMENT OF MORTALITY RISK HAS BEEN PREVIOUSLY PROPOSED FOR BARIATRIC SURGERY (DEMARIA EJ, PORTENIER D, WOLFE L, SURG OBES RELAT DIS. 2007;3:34-40.). THE OBESITY SURGERY MORTALITY RISK SCORE (OS-MRS) WAS DEVELOPED FROM A SINGLE INSTITUTION EXPERIENCE OF 2075 PATIENTS. THE CURRENT STUDY PROVIDES MULTICENTER VALIDATION OF THE VALUE OF THE OS-MRS. THE OS-M…			00034932	ANN. SURG.	ANNALS OF SURGERY	ENGLISH		578 – 582	LIPPINCOTT WILLIAMS AND WILKINS		203	DEMARIA E;MURR M;BYRNE T;BLACKSTONE R;GRANT J;BUDAK A;WOLFE L	10.1152/ajpregu.00291.2016	VALIDATION OF THE OBESITY SURGERY MORTALITY RISK SCORE IN A MULTICENTER STUDY PROVES IT STRATIFIES MORTALITY RISK IN PATIENTS UNDERGOING GASTRIC BYPASS FOR MORBID OBESITY	1	2007	DEMARIA ERIC J;MURR MICHEL;BYRNE T KARL;BLACKSTONE ROBIN;GRANT JOHN P;BUDAK AMANDA;WOLFE LUKE	E.J. DEMARIA; DUKE UNIVERSITY MEDICAL CENTER, DUMC-3288, DURHAM, NC 27710, UNITED STATES; EMAIL: ERIC.DEMARIA@DUKE.EDU		DUKE UNIVERSITY MEDICAL CENTER;VIRGINIA COMMONWEALTH UNIVERSITY;UNIVERSITY OF SOUTH FLORIDA;MEDICAL UNIVERSITY OF SOUTH CAROLINA;DUKE UNIVERSITY MEDICAL CENTER	DEMARIA E, 2007, ANN SURG	https://www.scopus.com/inward/record.uri?eid=2-s2.0-34748845711&doi=10.1097%2fSLA.0b013e318157206e&partnerID=40&md5=60cf9eb3378131dee7c7a01b7c3cbba3	SCOPUS
ROUX-EN-Y GASTRIC BYPASS SURGERY; HYPERINSULINEMIC HYPOGLYCEMIA; SYNDROME; GLUCAGON-LIKE PEPTIDE 1; ISLET FUNCTION; BETA-CELL FUNCTION; NORMAL GLUCOSE-TOLERANCE; INSULIN-SECRETION; MIXED; MEAL; ISLET HYPERPLASIA; HORMONE-RELEASE; INCRETIN LEVELS; OBESE-PATIENTS; NORMAL HUMANS	BETA-CELL FUNCTION; NORMAL GLUCOSE-TOLERANCE; INSULIN-SECRETION; MIXED; MEAL; HYPERINSULINEMIC HYPOGLYCEMIA; ISLET HYPERPLASIA; HORMONE-RELEASE; INCRETIN LEVELS; OBESE-PATIENTS; NORMAL HUMANS	SALEHI, M (CORRESPONDING AUTHOR), UNIV CINCINNATI, COLL MED, DEPT INTERNAL MED, DIV ENDOCRINOL DIABET \& METAB, 260 STETSON,SUITE 4200, CINCINNATI, OH 45219 USA.; SALEHI, MARZIEH; D'ALESSIO, DAVID A., UNIV CINCINNATI, COLL MED, DEPT MED, DIV ENDOCRINOL DIABET \& METAB, CINCINNATI, OH 45219 USA.; GASTALDELLI, AMALIA, CNR, INST CLIN PHYSIOL, CARDIOMETAB RISK UNIT, I-56100 PISA, ITALY.; D'ALESSIO, D…	BACKGROUND \& AIMS: POSTPRANDIAL GLYCEMIA EXCURSIONS INCREASE AFTER GASTRIC BYPASS SURGERY; THIS EFFECT IS EVEN GREATER AMONG PATIENTS WITH RECURRENT HYPOGLYCEMIA. THESE PATIENTS ALSO HAVE INCREASED POSTPRANDIAL LEVELS OF INSULIN AND GLUCAGON-LIKE PEPTIDE 1 (GLP-1). WE PERFORMED A CLINICAL TRIAL TO DETERMINE THE ROLE OF GLP-1 IN POSTPRANDIAL GLYCEMIA IN PATIENTS WITH HYPERINSULINEMIC HYPOGLYCEMIA…	1600 JOHN F KENNEDY BOULEVARD, STE 1800, PHILADELPHIA, PA 19103-2899 USA	UNIVERSITY SYSTEM OF OHIO; UNIVERSITY OF CINCINNATI; CONSIGLIO NAZIONALE DELLE RICERCHE (CNR); ISTITUTO DI FISIOLOGIA CLINICA (IFC-CNR); US DEPARTMENT OF VETERANS AFFAIRS; VETERANS HEALTH ADMINISTRATION (VHA); CINCINNATI VA MEDICAL CENTER	0016-5085	GASTROENTEROLOGY	GASTROENTEROLOGY	ENGLISH	GASTALDELLI, AMALIA/0000-0003-2594-1651	669+	W B SAUNDERS CO-ELSEVIER INC	GASTROENTEROLOGY \& HEPATOLOGY	201	SALEHI M;GASTALDELLI A;D'ALESSIO D	10.1053/j.gastro.2013.11.044	BLOCKADE OF GLUCAGONLIKE PEPTIDE 1 RECEPTOR CORRECTS POSTPRANDIAL HYPOGLYCEMIA AFTER GASTRIC BYPASS	2	2014	SALEHI MARZIEH;GASTALDELLI AMALIA;D'ALESSIO DAVID A	SALEHI, M (CORRESPONDING AUTHOR), UNIV CINCINNATI, COLL MED, DEPT INTERNAL MED, DIV ENDOCRINOL DIABET \& METAB, 260 STETSON,SUITE 4200, CINCINNATI, OH 45219 USA	Roux-en-Y Gastric Bypass Surgery; Hyperinsulinemic Hypoglycemia; Syndrome; Glucagon-like Peptide 1; Islet Function	UNIV CINCINNATI;UNIV CINCINNATI;INST CLIN PHYSIOL;CINCINNATI VA MED CTR	SALEHI M, 2014, GASTROENTEROLOGY		ISI
LIFE-STYLE INTERVENTION; Y GASTRIC BYPASS; BARIATRIC SURGERY; THERAPY; WEIGHT	LIFE-STYLE INTERVENTION; Y GASTRIC BYPASS; BARIATRIC SURGERY; THERAPY; WEIGHT	COURCOULAS, AP (CORRESPONDING AUTHOR), UNIV PITTSBURGH, MED CTR, DEPT SURG, 3380 BLVD ALLIES,STE 390, PITTSBURGH, PA 15213 USA.; COURCOULAS, ANITA P.; EAGLETON, JESSIE K., UNIV PITTSBURGH, MED CTR, DEPT SURG, PITTSBURGH, PA 15213 USA.; GOODPASTER, BRET H.; TOLEDO, FREDERICO G. S., UNIV PITTSBURGH, DEPT MED, DIV ENDOCRINOL \& METAB, PITTSBURGH, PA 15213 USA.; GOODPASTER, BRET H., FLORIDA HOSP, TRA…	IMPORTANCE MANY QUESTIONS REMAIN UNANSWERED ABOUT THE ROLE OF BARIATRIC SURGERY FOR PEOPLE WITH TYPE 2 DIABETES MELLITUS (T2DM). OBJECTIVE TO DETERMINE FEASIBILITY OF A RANDOMIZED CLINICAL TRIAL (RCT) AND COMPARE INITIAL OUTCOMES OF BARIATRIC SURGERY AND A STRUCTURED WEIGHT LOSS PROGRAM FOR TREATING T2DM IN PARTICIPANTS WITH GRADES I AND II OBESITY. DESIGN, SETTING, AND PARTICIPANTS A 12-MONTH, 3…	330 N WABASH AVE, STE 39300, CHICAGO, IL 60611-5885 USA	PENNSYLVANIA COMMONWEALTH SYSTEM OF HIGHER EDUCATION (PCSHE); UNIVERSITY OF PITTSBURGH; PENNSYLVANIA COMMONWEALTH SYSTEM OF HIGHER EDUCATION (PCSHE); UNIVERSITY OF PITTSBURGH; SANFORD BURNHAM PREBYS MEDICAL DISCOVERY INSTITUTE; ADVENTIST HEALTH SERVICES; ADVENTHEALTH; PENNSYLVANIA COMMONWEALTH SYSTEM OF HIGHER EDUCATION (PCSHE); UNIVERSITY OF PITTSBURGH; PENNSYLVANIA COMMONWEALTH SYSTEM OF HIGHER…	2168-6254	JAMA SURG.	JAMA SURGERY	ENGLISH	GRANCHI STEIDEL DE TOLEDO, FREDERICO/0000-0002-6570-9948 KENNEDY, JESSIE/0000-0003-0557-5789 KALARCHIAN, MELISSA/0000-0003-2099-9299	707-715	AMER MEDICAL ASSOC	SURGERY	199	COURCOULAS A;GOODPASTER B;EAGLETON J;BELLE S;KALARCHIAN M;LANG W;TOLEDO ;FREDERICO G S F;JAKICIC J	10.1001/jamasurg.2014.467	SURGICAL VS MEDICAL TREATMENTS FOR TYPE 2 DIABETES MELLITUS A RANDOMIZED CLINICAL TRIAL	1	2014	COURCOULAS ANITA P;GOODPASTER BRET H;EAGLETON JESSIE K; BELLE STEVEN H;KALARCHIAN MELISSA A;LANG WEI;TOLEDO; FREDERICO G S;JAKICIC JOHN M	COURCOULAS, AP (CORRESPONDING AUTHOR), UNIV PITTSBURGH, MED CTR, DEPT SURG, 3380 BLVD ALLIES,STE 390, PITTSBURGH, PA 15213 USA		UNIV PITTSBURGH;UNIV PITTSBURGH;UNIV PITTSBURGH;TRANSLAT RES INST;UNIV PITTSBURGH;UNIV PITTSBURGH;UNIV PITTSBURGH;DUQUESNE UNIV;WAKE FOREST SCH MED;UNIV PITTSBURGH	COURCOULAS A, 2014, JAMA SURG		ISI
BONE; CALCIUM; PARATHYROID HORMONE; ROUX-EN-Y GASTRIC BYPASS; VITAMIN D; ADULT; BONE AND BONES; BONE DENSITY; BONE REMODELING; DIETARY; DIET; DIETARY SUPPLEMENTS; FEMALE; FOLLOW-UP STUDIES; GASTRIC BYPASS; HUMANS; MIDDLE AGED; OBESITY; POSTMENOPAUSE; PREMENOPAUSE; WEIGHT LOSS; 25 HYDROXYVITAMIN D; 25-HYDROXYVITAMIN D; DRUG DERIVATIVE; ARTICLE; BLOOD; CALCIUM INTAKE; CLINICAL TRIAL; CONTROLLED CLI…	ADULT; BONE AND BONES; BONE DENSITY; BONE REMODELING; CALCIUM; DIETARY; DIET; DIETARY SUPPLEMENTS; FEMALE; FOLLOW-UP STUDIES; GASTRIC BYPASS; HUMANS; MIDDLE AGED; OBESITY; PARATHYROID HORMONE; POSTMENOPAUSE; PREMENOPAUSE; VITAMIN D; WEIGHT LOSS; 25 HYDROXYVITAMIN D; 25-HYDROXYVITAMIN D; DRUG DERIVATIVE; PARATHYROID HORMONE; VITAMIN D; ADULT; ARTICLE; BLOOD; BONE; BONE DENSITY; BONE REMODELING; CA…	DEPARTMENT OF NUTRITIONAL SCIENCES, RUTGERS UNIVERSITY, NEW BRUNSWICK, NJ, UNITED STATES; DEPANMENT OF SURGERY, ST. PETERS UNIVERSITY HOSPITAL, NEW BRUNSWICK, NJ, UNITED STATES; RUTGERS UNIVERSITY, NEW BRUNSWICK, NJ 08901-8525, 96 LIPMAN DRIVE, UNITED STATES	OBJECTIVE: TO EXAMINE BONE MASS AND METABOLISM IN WOMEN WHO HAD PREVIOUSLY UNDERGONE ROUX-EN-Y GASTRIC BYPASS (RYGB) AND DETERMINE THE EFFECT OF SUPPLEMENTATION WITH CALCIUM (CA) AND VITAMIN D. RESEARCH METHODS AND PROCEDURES: BONE MINERAL DENSITY AND BONE MINERAL CONTENT (BMC) WERE EXAMINED IN 44 RYGB WOMEN (≥3 YEARS POST-SURGERY; 31% WEIGHT LOSS; BMI, 34 KG/M 2) AND COMPARED WITH AGE- AND WEIGH…			10717323	OBES. RES.	OBESITY RESEARCH	ENGLISH		40 – 47	NORTH AMERICAN ASSOC. FOR THE STUDY OF OBESITY		198	GOODE L;BROLIN R;CHOWDHURY H;SHAPSES S	10.1038/oby.2004.7	BONE AND GASTRIC BYPASS SURGERY: EFFECTS OF DIETARY CALCIUM AND VITAMIN D	1	2004	GOODE LISA R;BROLIN ROBERT E;CHOWDHURY HASINA A;SHAPSES SUE A	S.A. SHAPSES; RUTGERS UNIVERSITY, NEW BRUNSWICK, NJ 08901-8525, 96 LIPMAN DRIVE, UNITED STATES; EMAIL: SHAPSES@AESOP.RUTGERS.EDU	Bone; Calcium; Parathyroid hormone; Roux-en-Y gastric bypass; Vitamin D	RUTGERS UNIVERSITY;ST. PETERS UNIVERSITY HOSPITAL;RUTGERS UNIVERSITY	GOODE L, 2004, OBES RES	https://www.scopus.com/inward/record.uri?eid=2-s2.0-2342575703&doi=10.1038%2foby.2004.7&partnerID=40&md5=2d22882f3f1b040e0bce4d9744b6f88c	SCOPUS
ADOLESCENT; BARIATRIC; GASTRIC BYPASS; METABOLIC SYNDROME; OBESITY; PEDIATRIC; SURGERY; ADULT; AGE FACTORS; COHORT STUDIES; FEMALE; FOLLOW-UP STUDIES; HUMANS; MALE; METABOLIC SYNDROME X; MORBID; POSTOPERATIVE COMPLICATIONS; TREATMENT OUTCOME; WEIGHT LOSS; CHOLESTEROL; GLUCOSE; HIGH DENSITY LIPOPROTEIN CHOLESTEROL; INSULIN; LOW DENSITY LIPOPROTEIN CHOLESTEROL; TRIACYLGLYCEROL; ARTICLE; BARIATRIC S…	ADOLESCENT; ADULT; AGE FACTORS; COHORT STUDIES; FEMALE; FOLLOW-UP STUDIES; GASTRIC BYPASS; HUMANS; MALE; METABOLIC SYNDROME X; OBESITY; MORBID; POSTOPERATIVE COMPLICATIONS; TREATMENT OUTCOME; WEIGHT LOSS; CHOLESTEROL; GLUCOSE; HIGH DENSITY LIPOPROTEIN CHOLESTEROL; INSULIN; LOW DENSITY LIPOPROTEIN CHOLESTEROL; TRIACYLGLYCEROL; ADOLESCENT; ADULT; ARTICLE; BARIATRIC SURGERY; BERIBERI; BODY MASS; CHO…	CENTER FOR EPIDEMIOLOGY AND BIOSTATISTICS, CINCINNATI CHILDREN'S HOSPITAL MEDICAL CENTER, CINCINNATI, OH 45255, UNITED STATES; DIVISION OF CARDIOLOGY, CINCINNATI CHILDREN'S HOSPITAL MEDICAL CENTER, CINCINNATI, OH 45255, UNITED STATES; DIVISION OF PEDIATRIC SURGERY, CINCINNATI CHILDREN'S HOSPITAL MEDICAL CENTER, CINCINNATI, OH 45229, UNITED STATES; DEPARTMENT OF SURGERY, UNIVERSITY OF FLORIDA, GAI…	BACKGROUND/PURPOSE: LITTLE IS KNOWN ABOUT THE METABOLIC OUTCOMES OF ADOLESCENT BARIATRIC SURGERY. WE REPORT CHANGES IN WEIGHT, METABOLIC PROFILE, AND TYPES OF COMPLICATIONS SEEN IN A MULTICENTER COHORT. METHODS: ONE-YEAR OUTCOMES WERE INCLUDED. FOR WEIGHT LOSS COMPARISONS, A NONSURGICAL COHORT (N = 12) WAS USED. THE PRIMARY OUTCOME WAS WEIGHT CHANGE (N = 30) AND SECONDARY OUTCOMES WERE METABOLIC …			00223468	J. PEDIATR. SURG.	JOURNAL OF PEDIATRIC SURGERY	ENGLISH		137 – 143			197	LAWSON M;KIRK S;MITCHELL T;CHEN M;LOUX T;DANIELS S;HARMON C;CLEMENTS R;GARCIA V;INGE T	10.1016/j.jpedsurg.2005.10.017	ONEYEAR OUTCOMES OF ROUXENY GASTRIC BYPASS FOR MORBIDLY OBESE ADOLESCENTS: A MULTICENTER STUDY FROM THE PEDIATRIC BARIATRIC STUDY GROUP	1	2006	LAWSON M LOUISE;KIRK SHELLEY;MITCHELL TERRY;CHEN MIKE K;LOUX TARA JEAN;DANIELS STEPHEN R;HARMON CARROLL M;CLEMENTS RONALD H;GARCIA VICTOR F;INGE THOMAS H	T.H. INGE; DIVISION OF PEDIATRIC SURGERY, CINCINNATI CHILDREN'S HOSPITAL MEDICAL CENTER, CINCINNATI, OH 45229, UNITED STATES; EMAIL: THOMAS.INGE@CCHMC.ORG	Adolescent; Bariatric; Gastric bypass; Metabolic syndrome; Obesity; Pediatric; Surgery	CENTER FOR EPIDEMIOLOGY AND BIOSTATISTICS;CINCINNATI CHILDREN'S HOSPITAL MEDICAL CENTER;CINCINNATI CHILDREN'S HOSPITAL MEDICAL CENTER;UNIVERSITY OF FLORIDA;UNIVERSITY OF ALABAMA AT BIRMINGHAM	LAWSON M, 2006, J PEDIATR SURG	https://www.scopus.com/inward/record.uri?eid=2-s2.0-30344439830&doi=10.1016%2fj.jpedsurg.2005.10.017&partnerID=40&md5=0d2f9182e095a4ea8ed9e4ff3beefd13	SCOPUS
BILIOPANCREATIC DIVERSION; WEIGHT-LOSS; BODY-COMPOSITION; DOUBLE-BLIND; DEFICIENCY; MORTALITY; DENSITY; OBESITY; PLASMA; TRENDS	BILIOPANCREATIC DIVERSION; WEIGHT-LOSS; BODY-COMPOSITION; DOUBLE-BLIND; DEFICIENCY; MORTALITY; DENSITY; OBESITY; PLASMA; TRENDS	AASHEIM, ET (CORRESPONDING AUTHOR), UNIV OSLO, AKER HOSP, HORMONE LAB, N-0514 OSLO, NORWAY.; AASHEIM, ERLEND T., UNIV OSLO, AKER HOSP, HORMONE LAB, N-0514 OSLO, NORWAY.; AASHEIM, ERLEND T.; BOHMER, THOMAS, UNIV OSLO, AKER HOSP, DEPT MED, N-0514 OSLO, NORWAY.; SOVIK, TORGEIR T.; MALA, TOM, UNIV OSLO, AKER HOSP, DEPT GASTROINTESTINAL SURG, N-0514 OSLO, NORWAY.; HANVOLD, SUSANNA E., UNIV OSLO, AKER …	BACKGROUND: BARIATRIC SURGERY IS WIDELY PERFORMED TO INDUCE WEIGHT LOSS. OBJECTIVE: THE OBJECTIVE WAS TO EXAMINE CHANGES IN VITAMIN STATUS AFTER 2 BARIATRIC SURGICAL TECHNIQUES. DESIGN: A RANDOMIZED CONTROLLED TRIAL WAS CONDUCTED IN 2 SCANDINAVIAN HOSPITALS. THE SUBJECTS WERE 60 SUPEROBESE PATIENTS [BODY MASS INDEX (BMI; IN KG/M(2)): 50-60]. THE SURGICAL INTERVENTIONS WERE EITHER LAPAROSCOPIC ROU…	GREAT CLARENDON ST, OXFORD OX2 6DP, ENGLAND	UNIVERSITY OF OSLO; UNIVERSITY OF OSLO; UNIVERSITY OF OSLO; UNIVERSITY OF OSLO; UNIVERSITY OF OSLO; SAHLGRENSKA UNIVERSITY HOSPITAL	0002-9165	AM. J. CLIN. NUTR.	AMERICAN JOURNAL OF CLINICAL NUTRITION	ENGLISH	BJORKMAN, SOFIA/0000-0001-9384-2562 MALA, TOM/0000-0003-3058-4775 OLBERS, TORSTEN/0000-0002-7218-3390 AASHEIM, ERLEND TUSETH/0000-0002-6246-6303	15-22	OXFORD UNIV PRESS	NUTRITION \& DIETETICS	190	AASHEIM E;BJORKMAN S;SOVIK T;ENGSTROM M;HANVOLD S;MALA T;OLBERS T;BOHMER T	10.3945/ajcn.2009.27583	VITAMIN STATUS AFTER BARIATRIC SURGERY: A RANDOMIZED STUDY OF GASTRIC BYPASS AND DUODENAL SWITCH	1	2009	AASHEIM ERLEND T;BJORKMAN SOFIA;SOVIK TORGEIR T; ENGSTROM MY;HANVOLD SUSANNA E;MALA TOM;OLBERS TORSTEN;BOHMER THOMAS	AASHEIM, ET (CORRESPONDING AUTHOR), UNIV OSLO, AKER HOSP, HORMONE LAB, N-0514 OSLO, NORWAY		UNIV OSLO;UNIV OSLO;UNIV OSLO;UNIV OSLO;UNIV OSLO;UNIV OSLO;SAHLGRENS UNIV HOSP	AASHEIM E, 2009, AM J CLIN NUTR		ISI
GASTRIC BYPASS-SURGERY; PHYSICAL-ACTIVITY; OBESITY; ELECTROMYOSTIMULATION; EMS	GASTRIC BYPASS-SURGERY; PHYSICAL-ACTIVITY; OBESITY; ELECTROMYOSTIMULATION; EMS	BORGHI-SILVA, A (CORRESPONDING AUTHOR), UNIV FED SAO CARLOS, DEPT PHYSIOTHERAPY, CARDIOPULM PHYSIOTHERAPY LAB, ROD WASHINGTON LUIS,KM 235, SAO CARLOS, SP, BRAZIL.; ANDRE, LARISSA DELGADO; BASSO-VANELLI, RENATA PEDROLONGO; RICCI, PAULA ANGELICA; DI THOMMAZO-LUPORINI, LUCIANA; PARIZOTTO, NIVALDO ANTONIO; BORGHI-SILVA, AUDREY, UNIV FED SAO CARLOS, DEPT PHYSIOTHERAPY, CARDIOPULM PHYSIOTHERAPY LAB, RO…	BACKGROUND/OBJECTIVES BARIATRIC SURGERY (BS) IS A SUCCESSFUL, LONG-LASTING TREATMENT OPTION FOR OBESE. THE EARLY POSTOPERATIVE (PO) PERIOD IS FOLLOWED BY DIETARY RESTRICTION AND PHYSICAL INACTIVITY, LEADING TO DECLINES IN MUSCLE MASS AND FUNCTIONAL CAPACITY. WHOLE-BODY ELECTROMYOSTIMULATION (WB-EMS) MAY BE A FEASIBLE AND POTENTIAL EARLY REHABILITATION STRATEGY POST BS. THE AIM WAS TO EVALUATE THE…	CAMPUS, 4 CRINAN ST, LONDON, N1 9XW, ENGLAND	UNIVERSIDADE FEDERAL DE SAO CARLOS; UNIVERSIDADE FEDERAL DE SAO CARLOS; UNIVERSITY OF ILLINOIS SYSTEM; UNIVERSITY OF ILLINOIS CHICAGO; UNIVERSITY OF ILLINOIS CHICAGO HOSPITAL	0307-0565	INT. J. OBES.	INTERNATIONAL JOURNAL OF OBESITY	ENGLISH	PAULA VIEIRA, RODOLFO/0000-0001-6379-1143 ARENA, ROSS/0000-0002-6675-1996 OLIVEIRA, CLAUDIO RICARDO/0000-0001-6154-3488 PARIZOTTO, NIVALDO ANTONIO/0000-0003-1774-9053	1476-1487	SPRINGERNATURE	ENDOCRINOLOGY \& METABOLISM; NUTRITION \& DIETETICS	189	ANDRE L;BASSO-VANELLI R;RICCI ;PAULA A P;DI T L;DE O;CLAUDIO R C;HADDAD G;HADDAD J;PARIZOTTO N;DE V R;ARENA R;BORGHI-SILVA A	10.1093/ajcn/85.2.346	WHOLEBODY ELECTRICAL STIMULATION AS A STRATEGY TO IMPROVE FUNCTIONAL CAPACITY AND PRESERVER LEAN MASS AFTER BARIATRIC SURGERY: A RANDOMIZED TRIPLEBLIND CONTROLLED TRIAL	1	2021	ANDRE LARISSA DELGADO;BASSO-VANELLI RENATA PEDROLONGO;RICCI; PAULA ANGELICA;DI THOMMAZO-LUPORINI LUCIANA;DE OLIVEIRA; CLAUDIO RICARDO;HADDAD GUILHERME FOCCHI;HADDAD JOSE MICHEL; PARIZOTTO NIVALDO ANTONIO;DE VIEIRA RODOLFO;ARENA ROSS; BORGHI-SILVA AUDREY	BORGHI-SILVA, A (CORRESPONDING AUTHOR), UNIV FED SAO CARLOS, DEPT PHYSIOTHERAPY, CARDIOPULM PHYSIOTHERAPY LAB, ROD WASHINGTON LUIS,KM 235, SAO CARLOS, SP, BRAZIL		UNIV FED SAO CARLOS;UNIV FED SAO CARLOS;UNIV FED SAO CARLOS;GASTRO VITA MED SPECIALIST CTR;BRAZILIAN INST TEACHING AND RES PULM AND EXERCISE IMM;UNIV ILLINOIS	ANDRE L, 2021, INT J OBES		ISI
QUALITY-OF-LIFE; FASTING PLASMA-GLUCOSE; BILIOPANCREATIC DIVERSION; WEIGHT-LOSS; BARIATRIC-SURGERY; OBESITY; COMPLICATIONS; VITAMIN; RISK; SUPEROBESITY	QUALITY-OF-LIFE; FASTING PLASMA-GLUCOSE; BILIOPANCREATIC DIVERSION; WEIGHT-LOSS; BARIATRIC-SURGERY; OBESITY; COMPLICATIONS; VITAMIN; RISK; SUPEROBESITY	OLBERS, T (CORRESPONDING AUTHOR), UNIV GOTHENBURG, SAHLGRENSKA ACAD, SAHLGRENSKA UNIV HOSP, DEPT GASTROSURG RES \& EDUC,INST CLIN SCI, POB 100, SE-40530 GOTHENBURG, SWEDEN.; RISSTAD, HILDE; AASHEIM, ERLEND T.; KRISTINSSON, JON A.; BIRKELAND, KARE I.; MALA, TOM, OSLO UNIV HOSP, DEPT ENDOCRINOL MORBID OBES \& PREVENT MED, OSLO, NORWAY.; RISSTAD, HILDE, UNIV OSLO, INST CLIN MED, OSLO, NORWAY.; SOVIK…	IMPORTANCE THERE IS NO CONSENSUS AS TO WHICH BARIATRIC PROCEDURE IS PREFERRED TO REDUCE WEIGHT AND IMPROVE HEALTH IN PATIENTS WITH A BODY MASS INDEX HIGHER THAN 50. OBJECTIVE TO COMPARE 5-YEAR OUTCOMES AFTER ROUX-EN-Y GASTRIC BYPASS (GASTRIC BYPASS) AND BILIOPANCREATIC DIVERSION WITH DUODENAL SWITCH (DUODENAL SWITCH). DESIGN, SETTING, AND PARTICIPANTS RANDOMIZED CLINICAL OPEN-LABEL TRIAL AT OSLO …	330 N WABASH AVE, STE 39300, CHICAGO, IL 60611-5885 USA	UNIVERSITY OF OSLO; UNIVERSITY OF OSLO; UNIVERSITY OF OSLO; SAHLGRENSKA UNIVERSITY HOSPITAL; UNIVERSITY OF OSLO; UNIVERSITY COLLEGE DUBLIN; UNIVERSITY OF OSLO	2168-6254	JAMA SURG.	JAMA SURGERY	ENGLISH	AASHEIM, ERLEND TUSETH/0000-0002-6246-6303 LE ROUX, CAREL/0000-0001-5521-5445 MALA, TOM/0000-0003-3058-4775 OLBERS, TORSTEN/0000-0002-7218-3390	352-361	AMER MEDICAL ASSOC	SURGERY	185	RISSTAD H;SOVIK T;ENGSTROM M;AASHEIM ;ERLEND T E;FAGERLAND M;OLSEN M;KRISTINSSON J;LE R C;BOHMER T;BIRKELAND K;MALA T;OLBERS T	10.1001/jamasurg.2014.3579	FIVEYEAR OUTCOMES AFTER LAPAROSCOPIC GASTRIC BYPASS AND LAPAROSCOPIC DUODENAL SWITCH IN PATIENTS WITH BODY MASS INDEX OF 50 TO 60 A RANDOMIZED CLINICAL TRIAL	1	2015	RISSTAD HILDE;SOVIK TORGEIR T;ENGSTROM MY;AASHEIM; ERLEND T;FAGERLAND MORTEN W;OLSEN MONIKA FAGEVIK; KRISTINSSON JON A;LE ROUX CAREL W;BOHMER THOMAS; BIRKELAND KARE I;MALA TOM;OLBERS TORSTEN	OLBERS, T (CORRESPONDING AUTHOR), UNIV GOTHENBURG, SAHLGRENSKA ACAD, SAHLGRENSKA UNIV HOSP, DEPT GASTROSURG RES \& EDUC,INST CLIN SCI, POB 100, SE-40530 GOTHENBURG, SWEDEN		UNIV GOTHENBURG;OSLO UNIV HOSP;UNIV OSLO;OSLO UNIV HOSP;SAHLGRENSKA UNIV GOTHENBURG;OSLO UNIV HOSP;UNIV COLL DUBLIN;OSLO UNIV HOSP	RISSTAD H, 2015, JAMA SURG		ISI
ADOLESCENT; ADULT; AGED; ASPARTATE AMINOTRANSFERASES; BLOOD GLUCOSE; C-REACTIVE PROTEIN; CHOLESTEROL; HDL; DIABETES MELLITUS; TYPE 2; FEMALE; GASTRIC BYPASS; HEMOGLOBIN A; GLYCOSYLATED; HUMANS; LONGITUDINAL STUDIES; MALE; MIDDLE AGED; TRIGLYCERIDES; URIC ACID; YOUNG ADULT; C PEPTIDE; HEMOGLOBIN A1C; ARTICLE; BARIATRIC SURGERY; BODY MASS; CELL FUNCTION; CLINICAL EFFECTIVENESS; CONTROLLED CLINICAL …	ADOLESCENT; ADULT; AGED; ASPARTATE AMINOTRANSFERASES; BLOOD GLUCOSE; C-REACTIVE PROTEIN; CHOLESTEROL; HDL; DIABETES MELLITUS; TYPE 2; FEMALE; GASTRIC BYPASS; HEMOGLOBIN A; GLYCOSYLATED; HUMANS; LONGITUDINAL STUDIES; MALE; MIDDLE AGED; TRIGLYCERIDES; URIC ACID; YOUNG ADULT; C PEPTIDE; HEMOGLOBIN A1C; ADULT; ARTICLE; BARIATRIC SURGERY; BODY MASS; CELL FUNCTION; CLINICAL EFFECTIVENESS; CONTROLLED CL…	BAKER IDI HEART AND DIABETES INSTITUTE, MELBOURNE, VIC, AUSTRALIA; PRIMARY CARE RESEARCH UNIT, MONASH UNIVERSITY, MELBOURNE, VIC, AUSTRALIA; DEPARTMENT OF INTERNAL MEDICINE, NATIONAL TAIWAN UNIVERSITY HOSPITAL, TAIPEI, TAIWAN; GRADUATE INSTITUTE OF CLINICAL MEDICINE, COLLEGE OF MEDICINE, NATIONAL TAIWAN UNIVERSITY, TAIPEI, TAIWAN; DEPARTMENT OF INTERNAL MEDICINE, MIN-SHENG GENERAL HOSPITAL, TAIWA…	OBJECTIVE - TO FIND CLINICALLY MEANINGFUL PREOPERATIVE PREDICTORS OF DIABETES REMISSION AND CONVERSELY INADEQUATE GLYCEMIC CONTROL AFTER GASTRIC BYPASS SURGERY. PREDICTING THE IMPROVEMENT IN GLYCEMIC CONTROL IN THOSE WITH TYPE 2 DIABETES AFTER BARIATRIC SURGERY MAY HELP IN PATIENT SELECTION. RESEARCH DESIGN AND METHODS - PREOPERATIVE DETAILS OF 154 ETHNIC CHINESE SUBJECTS WITH TYPE 2 DIABETES WER…			19355548	DIABETES CARE	DIABETES CARE	ENGLISH		20 – 26			183	DIXON J;CHUANG L;CHONG K;CHEN S;LAMBERT G;STRAZNICKY N;LAMBERT E;LEE W	10.2337/dc12-0779	PREDICTING THE GLYCEMIC RESPONSE TO GASTRIC BYPASS SURGERY IN PATIENTS WITH TYPE 2 DIABETES	1	2013	DIXON JOHN B;CHUANG LEE-MING;CHONG KEONG;CHEN SHU-CHUN;LAMBERT GAVIN W;STRAZNICKY NORA E;LAMBERT ELISABETH A;LEE WEI-JEI	W.-J. LEE; DEPARTMENT OF SURGERY, MIN-SHENG GENERAL HOSPITAL, TAIWAN; EMAIL: WJLEE_OBESSURG_TW@YAHOO.COM.TW		BAKER IDI HEART AND DIABETES INSTITUTE;MONASH UNIVERSITY;NATIONAL TAIWAN UNIVERSITY HOSPITAL;NATIONAL TAIWAN UNIVERSITY;MIN-SHENG GENERAL HOSPITAL;MIN-SHENG GENERAL HOSPITAL	DIXON J, 2013, DIABETES CARE	https://www.scopus.com/inward/record.uri?eid=2-s2.0-84872019969&doi=10.2337%2fdc12-0779&partnerID=40&md5=4c770041212430572835f5f6933509d7	SCOPUS
ADIPOKINES; BARIATRIC SURGERY; GASTRIC BYPASS; INCRETINES; INSULIN SENSITIVITY; SLEEVE GASTRECTOMY; ADIPONECTIN; ADULT; BLOOD GLUCOSE; FEMALE; FIBROBLAST GROWTH FACTORS; GASTRECTOMY; HUMANS; INSULIN RESISTANCE; LAPAROSCOPY; LEPTIN; MALE; MIDDLE AGED; OBESITY; MORBID; POSTOPERATIVE PERIOD; PROSPECTIVE STUDIES; WEIGHT LOSS; ADIPOCYTOKINE; FIBROBLAST GROWTH FACTOR 21; GLUCOSE; INSULIN; LIPID; ARTICL…	ADIPOKINES; ADIPONECTIN; ADULT; BLOOD GLUCOSE; FEMALE; FIBROBLAST GROWTH FACTORS; GASTRECTOMY; GASTRIC BYPASS; HUMANS; INSULIN RESISTANCE; LAPAROSCOPY; LEPTIN; MALE; MIDDLE AGED; OBESITY; MORBID; POSTOPERATIVE PERIOD; PROSPECTIVE STUDIES; WEIGHT LOSS; ADIPOCYTOKINE; ADIPONECTIN; FIBROBLAST GROWTH FACTOR 21; GLUCOSE; INSULIN; LEPTIN; LIPID; ADULT; ARTICLE; BARIATRIC SURGERY; BODY MASS; CLINICAL AR…	CLINICAL RESEARCH CENTER, DEPARTMENT OF BIOMEDICINE, UNIVERSITY HOSPITAL, BASEL, SWITZERLAND; DEPARTMENT OF SURGERY, ST. CLARASPITAL, BASEL CH-4016, KLEINRIEHENSTRASSE 30, SWITZERLAND; DEPARTMENT OF MEDICINE, ST. CLARASPITAL, BASEL, SWITZERLAND; DEPARTMENT OF GASTROENTEROLOGY, UNIVERSITY HOSPITAL, BASEL, SWITZERLAND	BACKGROUND: LAPAROSCOPIC ROUX-EN-Y GASTRIC BYPASS (LRYGB) AND LAPAROSCOPIC SLEEVE GASTRECTOMY (LSG) LEAD TO RAPID IMPROVEMENT IN INSULIN SENSITIVITY EVEN BEFORE WEIGHT LOSS OCCURS. ADIPOKINES ARE CLOSELY LINKED TO OBESITY AND INSULIN RESISTANCE. TO DATE, IT IS UNCLEAR WHETHER THE DIFFERENT ANATOMIC CHANGES OF THE VARIOUS BARIATRIC PROCEDURES HAVE DIFFERENT EFFECTS ON HORMONES OF ADIPOCYTE ORIGIN.…			18787533	SURG. OBES. RELAT. DIS.	SURGERY FOR OBESITY AND RELATED DISEASES	ENGLISH		561 – 568			181	WOELNERHANSSEN B;PETERLI R;STEINERT R;PETERS T;BORBÉLY Y;BEGLINGER C	10.1016/j.soard.2011.01.044	EFFECTS OF POSTBARIATRIC SURGERY WEIGHT LOSS ON ADIPOKINES AND METABOLIC PARAMETERS: COMPARISON OF LAPAROSCOPIC ROUXENY GASTRIC BYPASS AND LAPAROSCOPIC SLEEVE GASTRECTOMYA PROSPECTIVE RANDOMIZED TRIAL	2	2011	WOELNERHANSSEN BETTINA;PETERLI RALPH;STEINERT ROBERT E;PETERS THOMAS;BORBÉLY YVES;BEGLINGER CHRISTOPH	R. PETERLI; DEPARTMENT OF SURGERY, ST. CLARASPITAL, BASEL CH-4016, KLEINRIEHENSTRASSE 30, SWITZERLAND; EMAIL: RALPH.PETERLI@CLARASPITAL.CH	Adipokines; Bariatric surgery; Gastric bypass; Incretines; Insulin sensitivity; Sleeve gastrectomy	UNIVERSITY HOSPITAL;UNIVERSITY HOSPITAL	WOELNERHANSSEN B, 2011, SURG OBES RELAT DIS	https://www.scopus.com/inward/record.uri?eid=2-s2.0-80052836993&doi=10.1016%2fj.soard.2011.01.044&partnerID=40&md5=c1ea5dcb645fc24e763b4ddf3cedeccd	SCOPUS
BARIATRIC SURGERY; MORBID OBESITY; ROUX-EN-Y GASTRIC BYPASS; WEIGHT LOSS; ADOLESCENT; ADULT; AGED; FEMALE; FOLLOW-UP STUDIES; GASTRIC BYPASS; HUMANS; MALE; MIDDLE AGED; OBESITY; MORBID; PROSPECTIVE STUDIES; PROSTHESES AND IMPLANTS; TREATMENT OUTCOME; YOUNG ADULT; SILASTIC; ARTICLE; BODY MASS; BRAZIL; CLINICAL TRIAL; CONTROLLED CLINICAL TRIAL; CONTROLLED STUDY; DESCRIPTIVE RESEARCH; HUMAN; LONG TE…	ADOLESCENT; ADULT; AGED; FEMALE; FOLLOW-UP STUDIES; GASTRIC BYPASS; HUMANS; MALE; MIDDLE AGED; OBESITY; MORBID; PROSPECTIVE STUDIES; PROSTHESES AND IMPLANTS; TREATMENT OUTCOME; WEIGHT LOSS; YOUNG ADULT; SILASTIC; ADULT; AGED; ARTICLE; BODY MASS; BRAZIL; CLINICAL TRIAL; CONTROLLED CLINICAL TRIAL; CONTROLLED STUDY; DESCRIPTIVE RESEARCH; FEMALE; HUMAN; LONG TERM CARE; LONGITUDINAL STUDY; MAJOR CLINI…	DEPARTMENT OF SURGERY, STATE UNIVERSITY OF LONDRINA, LONDRINA, BRAZIL; UNIVERSITY HOSPITAL, STATE UNIVERSITY OF LONDRINA, LONDRINA, BRAZIL; STATE UNIVERSITY OF LONDRINA, LONDRINA, BRAZIL	BACKGROUND: AN UNDERLYING MAJOR AIM OF BARIATRIC SURGERY IS WEIGHT LOSS AND ITS LONG-TERM MAINTENANCE. IN SPITE OF THIS, MOST STUDIES REGARDING WEIGHT LOSS AFTER SURGICAL TREATMENT OF MORBID OBESITY SHOW 3-YEAR FOLLOW-UP RESULTS. WE EVALUATED THE EFFECTIVENESS OF SILASTIC RING ROUX-EN-Y GASTRIC BYPASS (SR-RYGBP) IN PROMOTING SIGNIFICANT WEIGHT LOSS AFTER AN 8-YEAR FOLLOW-UP AT THE LONDRINA STATE …			09608923	OBES. SURG.	OBESITY SURGERY	ENGLISH		1491 – 1495			176	VALEZI A;JUNIOR J;DE M M;DE B E;DE S S	10.1016/j.pcad.2013.09.005	WEIGHT LOSS OUTCOME AFTER SILASTIC RING ROUXENY GASTRIC BYPASS: 8 YEARS OF FOLLOWUP	1	2010	VALEZI ANTONIO CARLOS;JUNIOR JORGE MALI;DE MENEZES MARIANO ALMEIDA;DE BRITO EDIVALDO MACEDO;DE SOUZA SHIRLEY A F	A. C. VALEZI; DEPARTMENT OF SURGERY, STATE UNIVERSITY OF LONDRINA, LONDRINA, BRAZIL; EMAIL: VALEZI@SERCOMTEL.COM.BR	Bariatric surgery; Morbid obesity; Roux-en-Y gastric bypass; Weight loss	STATE UNIVERSITY OF LONDRINA;UNIVERSITY HOSPITAL;STATE UNIVERSITY OF LONDRINA	VALEZI A, 2010, OBES SURG	https://www.scopus.com/inward/record.uri?eid=2-s2.0-78449296179&doi=10.1007%2fs11695-010-0264-2&partnerID=40&md5=711cb5f3ba3b665742f6ad602c7e9d09	SCOPUS
BACTERIA; BACTERIAL OVERGROWTH; GASTRIC BYPASS; MICROBIOTA; MORBID OBESITY; PROBIOTICS; WEIGHT LOSS; ADULT; BODY MASS INDEX; CONFIDENCE INTERVALS; DOSE-RESPONSE RELATIONSHIP; DRUG; DRUG ADMINISTRATION SCHEDULE; FEMALE; FOLLOW-UP STUDIES; HUMANS; MALE; MIDDLE AGED; OBESITY; MORBID; PATIENT SATISFACTION; POSTOPERATIVE CARE; POSTOPERATIVE COMPLICATIONS; PROBABILITY; PROSPECTIVE STUDIES; REFERENCE VA…	ADULT; BODY MASS INDEX; CONFIDENCE INTERVALS; DOSE-RESPONSE RELATIONSHIP; DRUG; DRUG ADMINISTRATION SCHEDULE; FEMALE; FOLLOW-UP STUDIES; GASTRIC BYPASS; HUMANS; MALE; MIDDLE AGED; OBESITY; MORBID; PATIENT SATISFACTION; POSTOPERATIVE CARE; POSTOPERATIVE COMPLICATIONS; PROBABILITY; PROBIOTICS; PROSPECTIVE STUDIES; REFERENCE VALUES; RISK ASSESSMENT; TREATMENT OUTCOME; WEIGHT LOSS; PROBIOTIC AGENT; A…	DEPARTMENT OF SURGERY, SCHOOL OF MEDICINE, STANFORD UNIVERSITY, STANFORD, CA, UNITED STATES; STANFORD, CA 94025, 300 PASTEUR DRIVE, H3680, UNITED STATES	INTRODUCTION: ROUX-EN-Y GASTRIC BYPASS (RNYGB) SURGERY OFFERS AN EFFECTIVE AND ENDURING TREATMENT FOR MORBID OBESITY. GASTRIC BYPASS MAY ALTER GASTROINTESTINAL (GI) FLORA POSSIBLY RESULTING IN BACTERIAL OVERGROWTH AND DYSMOTILITY. OUR HYPOTHESIS WAS THAT DAILY USE OF PROBIOTICS WOULD IMPROVE GI OUTCOMES AFTER RNYGB. METHODS: FORTY-FOUR PATIENTS UNDERGOING RNYGB WERE RANDOMIZED TO EITHER A PROBIOT…			1091255X	J. GASTROINTEST. SURG.	JOURNAL OF GASTROINTESTINAL SURGERY	ENGLISH		1198 – 1204			172	WOODARD G;ENCARNACION B;DOWNEY J;PERAZA J;CHONG K;HERNANDEZ-BOUSSARD T;MORTON J	10.1007/s11605-009-0891-x	PROBIOTICS IMPROVE OUTCOMES AFTER ROUXENY GASTRIC BYPASS SURGERY: A PROSPECTIVE RANDOMIZED TRIAL	1	2009	WOODARD GAVITT A;ENCARNACION BETSY;DOWNEY JOHN R;PERAZA JOSEPH;CHONG KAREN;HERNANDEZ-BOUSSARD TINA;MORTON JOHN M	J. M. MORTON; STANFORD, CA 94025, 300 PASTEUR DRIVE, H3680, UNITED STATES; EMAIL: MORTON@STANFORD.EDU	Bacteria; Bacterial overgrowth; Gastric bypass; Microbiota; Morbid obesity; Probiotics; Weight loss	STANFORD UNIVERSITY	WOODARD G, 2009, J GASTROINTEST SURG	https://www.scopus.com/inward/record.uri?eid=2-s2.0-67349117656&doi=10.1007%2fs11605-009-0891-x&partnerID=40&md5=235faffdd87a01d41ff8c8ccdd9499b4	SCOPUS
ADULT; BILE ACIDS AND SALTS; BLOOD GLUCOSE; BODY MASS INDEX; BODY WEIGHT; GASTRECTOMY; GASTRIC BYPASS; GLUCAGON-LIKE PEPTIDE 1; HUMANS; OBESITY; MORBID; PEPTIDE YY; PILOT PROJECTS; POSTPRANDIAL PERIOD; PROSPECTIVE STUDIES; BILE ACID; GLUCAGON LIKE PEPTIDE 1; ARTICLE; BARIATRIC SURGERY; BILE ACID BLOOD LEVEL; CLINICAL ARTICLE; CONTROLLED STUDY; GLYCEMIC CONTROL; HUMAN; LAPAROSCOPIC SURGERY; PILOT …	ADULT; BILE ACIDS AND SALTS; BLOOD GLUCOSE; BODY MASS INDEX; BODY WEIGHT; GASTRECTOMY; GASTRIC BYPASS; GLUCAGON-LIKE PEPTIDE 1; HUMANS; OBESITY; MORBID; PEPTIDE YY; PILOT PROJECTS; POSTPRANDIAL PERIOD; PROSPECTIVE STUDIES; BILE ACID; GLUCAGON LIKE PEPTIDE 1; PEPTIDE YY; ADULT; ARTICLE; BARIATRIC SURGERY; BILE ACID BLOOD LEVEL; BODY WEIGHT; CLINICAL ARTICLE; CONTROLLED STUDY; GLYCEMIC CONTROL; HUM…	DEPARTMENT OF BIOMEDICINE, DIVISION OF GASTROENTEROLOGY, UNIVERSITY HOSPITAL BASEL, SWITZERLAND; DISCIPLINE OF MEDICINE, UNIVERSITY OF ADELAIDE SOUTH AUSTRALIA, ROYAL ADELAIDE HOSPITAL, ADELAIDE 5005, FROME ROAD, AUSTRALIA; DEPARTMENT OF SURGERY BASEL, ST. CLARASPITAL, SWITZERLAND; DEPARTMENT OF NUTRITIONAL PHYSIOLOGY, INSTITUTE OF NUTRITION, FRIEDRICH SCHILLER UNIVERSITY, JENA, GERMANY; DEPARTME…	OBJECTIVE INCREASED DELIVERY OF BILE ACID SALTS (BA) TO DISTAL L-CELLS AND ALTERED TGR5 RECEPTOR ACTIVATION MAY CONTRIBUTE TO THE EARLY AND SUBSTANTIAL INCREASES IN GUT PEPTIDE SECRETION SEEN AFTER BARIATRIC SURGERY. TO FURTHER ELUCIDATE A POTENTIAL ROLE OF BA IN THE SECRETION OF GLP-1 AND PYY, WE ANALYZED PLASMA BA CONCENTRATIONS IN 14 MORBIDLY OBESE PATIENTS UNDERGOING GASTRIC BYPASS OR SLEEVE …			1930739X	OBESITY	OBESITY	ENGLISH		E660–E668			170	STEINERT R;PETERLI R;KELLER S;MEYER-GERSPACH A;DREWE J;PETERS T;BEGLINGER C	10.1002/oby.20522	BILE ACIDS AND GUT PEPTIDE SECRETION AFTER BARIATRIC SURGERY: A 1YEAR PROSPECTIVE RANDOMIZED PILOT TRIAL	2	2013	STEINERT ROBERT E;PETERLI RALPH;KELLER SYLVIA;MEYER-GERSPACH ANNE C;DREWE JÜRGEN;PETERS THOMAS;BEGLINGER CHRISTOPH	R.E. STEINERT; DEPARTMENT OF BIOMEDICINE, DIVISION OF GASTROENTEROLOGY, UNIVERSITY HOSPITAL BASEL, SWITZERLAND; EMAIL: ROBERT.STEINERT@ADELAIDE.EDU.AU		UNIVERSITY HOSPITAL BASEL;UNIVERSITY OF ADELAIDE SOUTH AUSTRALIA;FRIEDRICH SCHILLER UNIVERSITY	STEINERT R, 2013, OBESITY	https://www.scopus.com/inward/record.uri?eid=2-s2.0-84889688521&doi=10.1002%2foby.20522&partnerID=40&md5=340c6beb7899da03f57ef470a4aed9cb	SCOPUS
TYPE 2 DIABETES MELLITUS; HYPERTENSION; BARIATRIC SURGERY; GLUCAGON-LIKE; PEPTIDE-1; CARDIOVASCULAR RISK; INFLAMMASOME ACTIVATION; ARTERIAL-HYPERTENSION; RISK-FACTOR; FATTY-ACID; COMPLICATIONS; ASSOCIATION; DISEASE; OBESITY	INFLAMMASOME ACTIVATION; ARTERIAL-HYPERTENSION; BARIATRIC SURGERY; RISK-FACTOR; FATTY-ACID; COMPLICATIONS; ASSOCIATION; DISEASE; OBESITY	LIANG, ZW (CORRESPONDING AUTHOR), THIRD MIL MED UNIV, SOUTHWEST HOSP, DEPT ENDOCRINOL, CHONGQING 400038, PEOPLES R CHINA.; LIANG, ZIWEN; WU, QINAN; CHEN, BING, THIRD MIL MED UNIV, SOUTHWEST HOSP, DEPT ENDOCRINOL, CHONGQING 400038, PEOPLES R CHINA.; LIANG, ZIWEN; OUYANG, XINSHOU, YALE UNIV, SCH MED, DEPT INTERNAL MED, SECT DIGEST DIS, NEW HAVEN, CT 06520 USA.; YU, PEIWU; ZHAO, HONGLIANG, THIRD MIL…	AIMS: THE AIM OF THIS STUDY WAS TO EVALUATE THE EFFECT OF LAPAROSCOPIC ROUX-EN-Y GASTRIC BYPASS (RYGB) SURGERY COMPARED WITH USUAL CARE WITH AND WITHOUT EXENATIDE THERAPY IN OBESE PEOPLE WITH TYPE 2 DIABETES MELLITUS (T2DM) AND HYPERTENSION. METHODS: 108 OBESE T2DM WITH HYPERTENSION WERE ENROLLED AND RANDOMLY ALLOCATED TO USUAL CARE (GROUP A), USUAL CARE PLUS EXENATIDE (GROUP B), AND RYGB SURGERY…	ELSEVIER HOUSE, BROOKVALE PLAZA, EAST PARK SHANNON, CO, CLARE, 00000, IRELAND	ARMY MEDICAL UNIVERSITY; YALE UNIVERSITY; ARMY MEDICAL UNIVERSITY	0168-8227	DIABETES RES. CLIN. PRACT.	DIABETES RESEARCH AND CLINICAL PRACTICE	ENGLISH		50-56	ELSEVIER IRELAND LTD	ENDOCRINOLOGY \& METABOLISM	170	LIANG Z;WU Q;CHEN B;YU P;ZHAO ;HONGLIANG H;OUYANG X	10.1016/j.diabres.2013.04.005	EFFECT OF LAPAROSCOPIC ROUXENY GASTRIC BYPASS SURGERY ON TYPE 2 DIABETES MELLITUS WITH HYPERTENSION: A RANDOMIZED CONTROLLED TRIAL	1	2013	LIANG ZIWEN;WU QINAN;CHEN BING;YU PEIWU;ZHAO; HONGLIANG;OUYANG XINSHOU	LIANG, ZW (CORRESPONDING AUTHOR), THIRD MIL MED UNIV, SOUTHWEST HOSP, DEPT ENDOCRINOL, CHONGQING 400038, PEOPLES R CHINA	Type 2 diabetes mellitus; Hypertension; Bariatric surgery; Glucagon-like; peptide-1; Cardiovascular risk	THIRD MIL MED UNIV;THIRD MIL MED UNIV;YALE UNIV;THIRD MIL MED UNIV	LIANG Z, 2013, DIABETES RES CLIN PRACT		ISI
DESFLURANE; DEXMEDETOMIDINE; FENTANYL; MORPHINE; OBESITY; PAIN; POSTOPERATIVE; ADRENERGIC ALPHA-AGONISTS; ADULT; ANALGESIA; PATIENT-CONTROLLED; ANALGESICS; NON-NARCOTIC; OPIOID; ANESTHETICS; COMBINED; INHALATION; BLOOD PRESSURE; DOUBLE-BLIND METHOD; ELECTROENCEPHALOGRAPHY; FEMALE; GASTRIC BYPASS; HEART RATE; HUMANS; HYPNOTICS AND SEDATIVES; ISOFLURANE; MALE; MIDDLE AGED; MORBID; EPHEDRINE; LIDOCA…	ADRENERGIC ALPHA-AGONISTS; ADULT; ANALGESIA; PATIENT-CONTROLLED; ANALGESICS; NON-NARCOTIC; ANALGESICS; OPIOID; ANESTHETICS; COMBINED; ANESTHETICS; INHALATION; BLOOD PRESSURE; DEXMEDETOMIDINE; DOUBLE-BLIND METHOD; ELECTROENCEPHALOGRAPHY; FEMALE; FENTANYL; GASTRIC BYPASS; HEART RATE; HUMANS; HYPNOTICS AND SEDATIVES; ISOFLURANE; MALE; MIDDLE AGED; OBESITY; MORBID; PAIN; POSTOPERATIVE; DESFLURANE; DE…	DEPARTMENT OF ANESTHESIOLOGY, UNIVERSITY OF ILLINOIS AT CHICAGO, CHICAGO, IL 60612, UNITED STATES	STUDY OBJECTIVE: BECAUSE FENTANYL HAS VENTILATORY DEPRESSING EFFECTS, ALTERNATIVE METHODS FOR ANALGESIA MAY BE BENEFICIAL FOR MANAGEMENT OF BARIATRIC SURGERY. WE EVALUATED WHETHER DEXMEDETOMIDINE INFUSION COULD REPLACE FENTANYL FOR FACILITATION OF OPEN GASTRIC BYPASS SURGERY. DESIGN: RANDOMIZED, SINGLE BLINDED, OPEN LABEL. SETTING: UNIVERSITY TEACHING HOSPITAL. PATIENTS: TWENTY BARIATRIC PATIENTS…			09528180	J. CLIN. ANESTH.	JOURNAL OF CLINICAL ANESTHESIA	ENGLISH		24 – 28			168	FELD J;HOFFMAN W;STECHERT M;HOFFMAN I;ANANDA R	10.1016/j.jclinane.2005.05.009	FENTANYL OR DEXMEDETOMIDINE COMBINED WITH DESFLURANE FOR BARIATRIC SURGERY	1	2006	FELD JAMES M;HOFFMAN WILLIAM E;STECHERT MARTIN M;HOFFMAN IAN W;ANANDA RANGA C	W.E. HOFFMAN; DEPARTMENT OF ANESTHESIOLOGY, UNIVERSITY OF ILLINOIS AT CHICAGO, CHICAGO, IL 60612, UNITED STATES; EMAIL: WHOFFMAN@UIC.EDU	Desflurane; Dexmedetomidine; Fentanyl; Morphine; Obesity; Pain; postoperative	UNIVERSITY OF ILLINOIS AT CHICAGO	FELD J, 2006, J CLIN ANESTH	https://www.scopus.com/inward/record.uri?eid=2-s2.0-33644677786&doi=10.1016%2fj.jclinane.2005.05.009&partnerID=40&md5=eee83bb69163816962e933ed74e33c97	SCOPUS
NATRIURETIC PEPTIDE; OBESITY; SALT INTAKE; BODY-MASS INDEX; PLASMA-LEVELS; BLOOD-PRESSURE; OBESE SUBJECTS; EXPRESSION; ATRIAL; DISEASE; RISK; HYPERTENSION; MECHANISMS	BODY-MASS INDEX; PLASMA-LEVELS; BLOOD-PRESSURE; OBESE SUBJECTS; EXPRESSION; ATRIAL; DISEASE; RISK; HYPERTENSION; MECHANISMS	WANG, TJ (CORRESPONDING AUTHOR), VANDERBILT UNIV, MED CTR, DIV CARDIOVASC MED, 2220 PIERCE AVE,383 PRB, NASHVILLE, TN 37232 USA.; ARORA, PANKAJ, UNIV ALABAMA BIRMINGHAM, DEPT MED, DIV CARDIOL, BIRMINGHAM, AL USA.; REINGOLD, JASON, ST JOSEPHS RES INST, ATLANTA CARDIOL \& PRIMARY CARE, ATLANTA, GA USA.; BAGGISH, AARON; GUANAGA, DEREK P.; GHORBANI, ANAHITA; SEMIGRAN, MARC J.; BLOCH, KENNETH D.; SCHE…	BACKGROUND-IN EPIDEMIOLOGIC STUDIES, OBESITY HAS BEEN ASSOCIATED WITH REDUCED NATRIURETIC PEPTIDE (NP) CONCENTRATIONS. REDUCED NP PRODUCTION COULD IMPAIR THE ABILITY OF OBESE INDIVIDUALS TO RESPOND TO SALT LOADS, INCREASING THE RISK OF HYPERTENSION AND OTHER DISORDERS. WE HYPOTHESIZED THAT WEIGHT LOSS ENHANCES NP PRODUCTION BEFORE AND AFTER SALT LOADING. METHODS AND RESULTS-WE ENROLLED 15 OBESE I…	111 RIVER ST, HOBOKEN 07030-5774, NJ USA	UNIVERSITY OF ALABAMA SYSTEM; UNIVERSITY OF ALABAMA BIRMINGHAM; HARVARD UNIVERSITY; HARVARD UNIVERSITY MEDICAL AFFILIATES; MASSACHUSETTS GENERAL HOSPITAL; HARVARD UNIVERSITY; HARVARD UNIVERSITY MEDICAL AFFILIATES; MASSACHUSETTS GENERAL HOSPITAL; HARVARD UNIVERSITY; HARVARD UNIVERSITY MEDICAL AFFILIATES; MASSACHUSETTS GENERAL HOSPITAL; VANDERBILT UNIVERSITY; MCGILL UNIVERSITY; JEWISH GENERAL HOSPI…		J. AM. HEART ASSOC.	JOURNAL OF THE AMERICAN HEART ASSOCIATION	ENGLISH	BAGGISH, AARON/0000-0003-2042-1489 ARORA, PANKAJ/0000-0003-2420-3550 WANG, THOMAS/0000-0003-4063-6508		WILEY	CARDIOVASCULAR SYSTEM \& CARDIOLOGY	167	ARORA P;REINGOLD J;BAGGISH A;GUANAGA D;P. P;WU C;GHORBANI A;SONG Y;CHEN-TOURNAUX A;KHAN A;TAINSH L;BUYS E;WILLIAMS J;HEUBLEIN D;BURNETT J;SEMIGRAN M;BLOCH K;SCHERRER-CROSBIE M;NEWTON-CHEH C;KAPLAN L;M. M;WANG T	10.1161/JAHA.114.001265	WEIGHT LOSS SALINE LOADING AND THE NATRIURETIC PEPTIDE SYSTEM	1	2015	ARORA PANKAJ;REINGOLD JASON;BAGGISH AARON;GUANAGA DEREK; P;WU CONNIE;GHORBANI ANAHITA;SONG YANNA; CHEN-TOURNAUX ANNABEL;KHAN ABIGAIL MAY;TAINSH LAUREL T; BUYS EMMANUEL S;WILLIAMS JONATHAN S;HEUBLEIN DENISE M; BURNETT JOHN C;SEMIGRAN MARC J;BLOCH KENNETH D; SCHERRER-CROSBIE MARIELLE;NEWTON-CHEH CHRISTOPHER;KAPLAN LEE; M;WANG THOMAS J	WANG, TJ (CORRESPONDING AUTHOR), VANDERBILT UNIV, MED CTR, DIV CARDIOVASC MED, 2220 PIERCE AVE,383 PRB, NASHVILLE, TN 37232 USA	natriuretic peptide; obesity; salt intake	VANDERBILT UNIV;UNIV ALABAMA BIRMINGHAM;ST JOSEPHS RES INST;SCHERRER-CROSBIE;MASSACHUSETTS GEN HOSP;MASSACHUSETTS GEN HOSP;MASSACHUSETTS GEN HOSP;VANDERBILT UNIV;MCGILL UNIV;UNIV PENN;BRIGHAM AND WOMENS HOSP;MAYO CLIN;VANDERBILT UNIV	ARORA P, 2015, J AM HEART ASSOC		ISI
BARIATRIC SURGERY; LUNG VOLUME MEASUREMENTS; OBESITY; MORBID; POSITIVE-PRESSURE RESPIRATION; PULMONARY GAS EXCHANGE; RESPIRATORY-DISTRESS-SYNDROME; POSTOPERATIVE PULMONARY COMPLICATIONS; PROTECTIVE MECHANICAL VENTILATION; LAPAROSCOPIC GASTRIC BYPASS; RECRUITMENT MANEUVERS; COMPUTED-TOMOGRAPHY; ALVEOLAR COLLAPSE; BARIATRIC; SURGERY; DRIVING PRESSURE; AIRWAY PRESSURE	RESPIRATORY-DISTRESS-SYNDROME; POSTOPERATIVE PULMONARY COMPLICATIONS; PROTECTIVE MECHANICAL VENTILATION; LAPAROSCOPIC GASTRIC BYPASS; RECRUITMENT MANEUVERS; COMPUTED-TOMOGRAPHY; ALVEOLAR COLLAPSE; BARIATRIC; SURGERY; DRIVING PRESSURE; AIRWAY PRESSURE	WRIGGE, H (CORRESPONDING AUTHOR), UNIV LEIPZIG, DEPT ANAESTHESIA \& INTENS CARE MED, LIEBIGSTR 20, D-04103 LEIPZIG, GERMANY.; WRIGGE, H (CORRESPONDING AUTHOR), UNIV LEIPZIG, INTEGRATED RES \& TREATMENT CTR IFB ADIPOSITYDIS, LEIPZIG, GERMANY.; NESTLER, C.; SIMON, P.; HAMMERMUELLER, S.; KAMRATH, D.; WOLF, S.; GIANNELLA-NETO, A.; RESKE, A. W.; WRIGGE, H., UNIV LEIPZIG, DEPT ANAESTHESIA \& INTENS CAR…	BACKGROUND. GENERAL ANAESTHESIA LEADS TO ATELECTASIS, REDUCED END-EXPIRATORY LUNG VOLUME (EELV), AND DIMINISHED ARTERIAL OXYGENATION IN OBESE PATIENTS. WE HYPOTHESIZED THAT A COMBINATION OF A RECRUITMENT MANOEUVRE (RM) AND INDIVIDUALIZED POSITIVE END-EXPIRATORY PRESSURE (PEEP) CAN AVOID THESE EFFECTS. METHODS. PATIENTS WITH A BMI A PARTS PER THOUSAND 35 KG M(-2) UNDERGOING ELECTIVE LAPAROSCOPIC S…	THE BOULEVARD, LANGFORD LANE, KIDLINGTON, OXFORD OX5 1GB, OXON, ENGLAND	LEIPZIG UNIVERSITY; LEIPZIG UNIVERSITY; LEIPZIG UNIVERSITY; LEIPZIG UNIVERSITY; UNIVERSIDADE FEDERAL DO RIO DE JANEIRO; UNIVERSIDADE FEDERAL DE MINAS GERAIS; UNIVERSIDADE FEDERAL DE MINAS GERAIS; UNIVERSIDADE FEDERAL DO RIO DE JANEIRO	0007-0912	BR. J. ANAESTH.	BRITISH JOURNAL OF ANAESTHESIA	ENGLISH	CARVALHO, ALYSSON/0000-0003-2708-7735 PETROFF, DAVID/0000-0002-6916-1465 RESKE, ANDREAS/0000-0002-2759-0245	1194-1205	ELSEVIER SCI LTD	ANESTHESIOLOGY	167	NESTLER C;SIMON P;PETROFF D;HAMMERMUELLER S;KAMRATH D;WOLF S;DIETRICH A;CAMILO L;BEDA A;CARVALHO A;GIANNELLA-NETO A;RESKE A;WRIGGE ;H. H	10.1093/bja/aex192	INDIVIDUALIZED POSITIVE ENDEXPIRATORY PRESSURE IN OBESE PATIENTS DURING GENERAL ANAESTHESIA: A RANDOMIZED CONTROLLED CLINICAL TRIAL USING ELECTRICAL IMPEDANCE TOMOGRAPHY	2	2017	NESTLER C;SIMON P;PETROFF D;HAMMERMUELLER S; KAMRATH D;WOLF S;DIETRICH A;CAMILO L M;BEDA A;CARVALHO A R;GIANNELLA-NETO A;RESKE A W;WRIGGE; H	WRIGGE, H (CORRESPONDING AUTHOR), UNIV LEIPZIG, DEPT ANAESTHESIA \& INTENS CARE MED, LIEBIGSTR 20, D-04103 LEIPZIG, GERMANY	bariatric surgery; lung volume measurements; obesity; morbid; positive-pressure respiration; pulmonary gas exchange	UNIV LEIPZIG;UNIV LEIPZIG;RESKE;UNIV LEIPZIG;RESKE;UNIV LEIPZIG;UNIV LEIPZIG;UNIV LEIPZIG;UNIV FED RIO DE JANEIRO;UNIV FED MINAS GERAIS;UNIV FED MINAS GERAIS;UNIV FED RIO DE JANEIRO	NESTLER C, 2017, BR J ANAESTH		ISI
INTENSIVE MEDICAL THERAPY; BARIATRIC SURGERY; WEIGHT-LOSS; MORBID-OBESITY; MECHANISMS; GLUCOSE	INTENSIVE MEDICAL THERAPY; BARIATRIC SURGERY; WEIGHT-LOSS; MORBID-OBESITY; MECHANISMS; GLUCOSE	HJELMESÆTH, J (CORRESPONDING AUTHOR), VESTFOLD HOSP TRUST, MORBID OBES CTR, N-3103 TONSBERG, NORWAY.; HOFSO, DAG; FATIMA, FARHAT; BORGERAAS, HEIDI; HERTEL, JENS KRISTOFFER; JOHNSON, LINE KRISTIN; NORDSTRAND, NJORD; SMASTUEN, MILADA CVANCAROVA; SVANEVIK, MARIUS; SANDBU, RUNE; HJELMESAETH, JORAN, VESTFOLD HOSP TRUST, MORBID OBES CTR, N-3103 TONSBERG, NORWAY.; LINDBERG, MORTEN, VESTFOLD HOSP TRUST, …	BACKGROUND FOR PATIENTS WITH OBESITY AND TYPE 2 DIABETES, WEIGHT LOSS IMPROVES INSULIN SENSITIVITY AND BETA-CELL FUNCTION, AND CAN INDUCE REMISSION OF DIABETES. THE COMPARATIVE EFFICACY OF VARIOUS BARIATRIC PROCEDURES FOR THE REMISSION OF TYPE 2 DIABETES HAS NOT BEEN FULLY ELUCIDATED. WE AIMED TO COMPARE THE EFFECTS OF THE TWO MOST COMMON BARIATRIC PROCEDURES, GASTRIC BYPASS AND SLEEVE GASTRECTOM…	STE 800, 230 PARK AVE, NEW YORK, NY 10169 USA	UNIVERSITY OF OSLO; UNIVERSITY OF OSLO; UNIVERSITY OF OSLO; NORWEGIAN INSTITUTE OF PUBLIC HEALTH (NIPH); UNIVERSITY OF OSLO; OSLO METROPOLITAN UNIVERSITY (OSLOMET); UNIVERSITY OF PENNSYLVANIA; UNIVERSITY OF OSLO; UNIVERSITY OF OSLO	2213-8587	LANCET DIABETES ENDOCRINOL.	LANCET DIABETES \& ENDOCRINOLOGY	ENGLISH	BORGERAAS, HEIDI/0000-0002-8357-4688 VALDERHAUG, TONE GRETLAND/0000-0002-9953-7865 LINDBERG, MORTEN/0000-0002-5568-7810 FATIMA, FARHAT/0000-0002-5549-8649	912-924	ELSEVIER SCIENCE INC	ENDOCRINOLOGY \& METABOLISM	167	HOFSO D;FATIMA F;BORGERAAS H;BIRKELAND K;INGE I;GULSETH H;HERTEL J;JOHNSON ;LINE K L;LINDBERG M;NORDSTRAND N;SMASTUEN ;MILADA C M;STEFANOVSKI D;SVANEVIK M;VALDERHAUG T;SANDBU R;HJELMESAETH J	10.1016/S2213-8587(19)30344-4	GASTRIC BYPASS VERSUS SLEEVE GASTRECTOMY IN PATIENTS WITH TYPE 2 DIABETES (OSEBERG): A SINGLECENTRE TRIPLEBLIND RANDOMISED CONTROLLED TRIAL	2	2019	HOFSO DAG;FATIMA FARHAT;BORGERAAS HEIDI;BIRKELAND KARE; INGE;GULSETH HANNE LOVDAL;HERTEL JENS KRISTOFFER;JOHNSON; LINE KRISTIN;LINDBERG MORTEN;NORDSTRAND NJORD;SMASTUEN; MILADA CVANCAROVA;STEFANOVSKI DARKO;SVANEVIK MARIUS; VALDERHAUG TONE GRETLAND;SANDBU RUNE;HJELMESAETH JORAN	HJELMESÆTH, J (CORRESPONDING AUTHOR), VESTFOLD HOSP TRUST, MORBID OBES CTR, N-3103 TONSBERG, NORWAY		MORBID OBES CTR;MORBID OBES CTR;VESTFOLD HOSP TRUST;VESTFOLD HOSP TRUST;UNIV OSLO;UNIV OSLO;OSLO UNIV HOSP;NORWEGIAN INST PUBL HLTH;OSLO UNIV HOSP;OSLO METROPOLITAN UNIV;UNIV PENN;AKERSHUS UNIV HOSP;UNIV OSLO	HOFSO D, 2019, LANCET DIABETES ENDOCRINOL		ISI
INTENSIVE MEDICAL-MANAGEMENT; LONG-TERM REMISSION; BARIATRIC SURGERY; OBESE-PATIENTS; LIFE-STYLE; TYPE-2; MELLITUS; THERAPY; HYPERTENSION; ADULTS	INTENSIVE MEDICAL-MANAGEMENT; LONG-TERM REMISSION; BARIATRIC SURGERY; OBESE-PATIENTS; LIFE-STYLE; TYPE-2; MELLITUS; THERAPY; HYPERTENSION; ADULTS	BILLINGTON, CJ (CORRESPONDING AUTHOR), UNIV MINNESOTA, DEPT MED, MINNEAPOLIS, MN 55417 USA.; IKRAMUDDIN, SAYEED; LESLIE, DANIEL B., UNIV MINNESOTA, DEPT SURG, MINNEAPOLIS, MN 55417 USA.; BILLINGTON, CHARLES J.; BANTLE, JOHN P., UNIV MINNESOTA, DEPT MED, DIV ENDOCRINOL \& DIABET, MINNEAPOLIS, MN 55417 USA.; THOMAS, AVIS J.; CONNETT, JOHN E.; WANG, QI, UNIV MINNESOTA, DEPT BIOSTAT, MINNEAPOLIS, MN …	BACKGROUND CONVENTIONAL TREATMENTS FOR PATIENTS WITH TYPE 2 DIABETES ARE OFTEN INADEQUATE. WE AIMED TO ASSESS OUTCOMES OF DIABETES CONTROL AND TREATMENT RISKS 2 YEARS AFTER ADDING ROUX-EN-Y GASTRIC BYPASS TO INTENSIVE LIFESTYLE AND MEDICAL MANAGEMENT. METHODS WE REPORT 2-YEAR OUTCOMES OF A 5-YEAR RANDOMISED TRIAL (THE DIABETES SURGERY STUDY) AT FOUR TEACHING HOSPITALS (THREE IN THE USA AND ONE IN…	STE 800, 230 PARK AVE, NEW YORK, NY 10169 USA	UNIVERSITY OF MINNESOTA SYSTEM; UNIVERSITY OF MINNESOTA TWIN CITIES; UNIVERSITY OF MINNESOTA SYSTEM; UNIVERSITY OF MINNESOTA TWIN CITIES; UNIVERSITY OF MINNESOTA SYSTEM; UNIVERSITY OF MINNESOTA TWIN CITIES; UNIVERSITY OF MINNESOTA SYSTEM; UNIVERSITY OF MINNESOTA TWIN CITIES; UNIVERSITY OF MINNESOTA SYSTEM; UNIVERSITY OF MINNESOTA TWIN CITIES; NATIONAL TAIWAN UNIVERSITY; NATIONAL TAIWAN UNIVERSITY…	2213-8587	LANCET DIABETES ENDOCRINOL.	LANCET DIABETES \& ENDOCRINOLOGY	ENGLISH	CHUANG, LEE-MING/0000-0003-0978-2662 WANG, QI/0000-0001-6341-6087 BELANI, KUMAR/0000-0003-1784-136X	413-422	ELSEVIER SCIENCE INC	ENDOCRINOLOGY \& METABOLISM	166	IKRAMUDDIN S;BILLINGTON C;LEE W;BANTLE J;THOMAS A;CONNETT J;LESLIE ;DANIEL B D;INABNET W;JEFFERY R;CHONG ;KEONG K;CHUANG L;SARR M;JENSEN M;VELLA A;AHMED L;BELANI K;SCHONE J;L. L;OLOFSON A;BAINBRIDGE H;LAQUA P;WANG Q;KORNER J	10.1016/S2213-8587(15)00089-3	ROUXENY GASTRIC BYPASS FOR DIABETES (THE DIABETES SURGERY STUDY): 2YEAR OUTCOMES OF A 5YEAR RANDOMISED CONTROLLED TRIAL	1	2015	IKRAMUDDIN SAYEED;BILLINGTON CHARLES J;LEE WEI-JEI; BANTLE JOHN P;THOMAS AVIS J;CONNETT JOHN E;LESLIE; DANIEL B;INABNET III WILLIAM B;JEFFERY ROBERT W;CHONG; KEONG;CHUANG LEE-MING;SARR MICHAEL G;JENSEN MICHAEL D;VELLA ADRIAN;AHMED LEAQUE;BELANI KUMAR;SCHONE JOYCE; L;OLOFSON AMY E;BAINBRIDGE HEATHER A;LAQUA PATRICIA S;WANG QI;KORNER JUDITH	BILLINGTON, CJ (CORRESPONDING AUTHOR), UNIV MINNESOTA, DEPT MED, MINNEAPOLIS, MN 55417 USA		UNIV MINNESOTA;UNIV MINNESOTA;UNIV MINNESOTA;UNIV MINNESOTA;UNIV MINNESOTA;UNIV MINNESOTA;NATL TAIWAN UNIV HOSP;NATL TAIWAN UNIV HOSP;MT SINAI MED CTR;COLUMBIA UNIV COLL PHYS AND SURG;MIN SHENG GEN HOSP;MAYO CLIN;MAYO CLIN;SCHONE;COLUMBIA UNIV	IKRAMUDDIN S, 2015, LANCET DIABETES ENDOCRINOL		ISI
GALLBLADDER BILE COMPOSITION; URSODEOXYCHOLIC ACID; REDUCTION; MOTILITY; DISEASE	GALLBLADDER BILE COMPOSITION; URSODEOXYCHOLIC ACID; REDUCTION; MOTILITY; DISEASE	CHAPMAN, WC (CORRESPONDING AUTHOR), VANDERBILT UNIV, MED CTR, DEPT SURG, DIV HEPATOBILIARY SURG \& LIVER TRANSPLANTAT, OXFORD HOUSE,SUITE 801, NASHVILLE, TN 37232 USA.; VANDERBILT UNIV, MED CTR, DEPT SURG, DIV HEPATOBILIARY SURG \& LIVER TRANSPLANTAT, NASHVILLE, TN 37232 USA.; VANDERBILT UNIV, MED CTR, DEPT PREVENTAT MED, NASHVILLE, TN 37232 USA.; DEPT VET AFFAIRS, NASHVILLE, TN 37232 USA.	INTRODUCTION. AN INCREASED RISK OF GALLSTONE (GS) FORMATION HAS BEEN LINKED TO OBESITY AND TO EPISODES OF RAPID AND SIGNIFICANT WEIGHT LOSS. PREVIOUS REPORTS HAVE SUGGESTED THAT BILE SALT THERAPY (URSODEOXYCHOLIC ACID) OR PROSTAGLANDIN INHIBITION (IBUPROFEN) MAY PREVENT GALLSTONE FORMATION IN THIS HIGH-RISK GROUP. THE PURPOSE OF THIS STUDY WAS TO INVESTIGATE GS PREVENTION FOLLOWING BARIATRIC SURG…	525 B ST, STE 1900, SAN DIEGO, CA 92101-4495 USA	VANDERBILT UNIVERSITY; VANDERBILT UNIVERSITY	0022-4804	J. SURG. RES.	JOURNAL OF SURGICAL RESEARCH	ENGLISH	SHYR, YU/0000-0003-2086-9670 CHAPMAN, WILLIAM/0000-0002-0072-3239	50-56	ACADEMIC PRESS INC ELSEVIER SCIENCE	SURGERY	163	WUDEL L;WRIGHT J;DEBELAK J;ALLOS T;SHYR Y;CHAPMAN W	10.1006/jsre.2001.6322	PREVENTION OF GALLSTONE FORMATION IN MORBIDLY OBESE PATIENTS UNDERGOING RAPID WEIGHT LOSS: RESULTS OF A RANDOMIZED CONTROLLED PILOT STUDY	1	2002	WUDEL LJ;WRIGHT JK;DEBELAK JP;ALLOS TM;SHYR Y; CHAPMAN WC	CHAPMAN, WC (CORRESPONDING AUTHOR), VANDERBILT UNIV, MED CTR, DEPT SURG, DIV HEPATOBILIARY SURG \& LIVER TRANSPLANTAT, OXFORD HOUSE,SUITE 801, NASHVILLE, TN 37232 USA		VANDERBILT UNIV;VANDERBILT UNIV;VANDERBILT UNIV	WUDEL L, 2002, J SURG RES		ISI
ANALYSIS OF VARIANCE; ANIMALS; BODY WEIGHT/PHYSIOLOGY; CHOICE BEHAVIOR/PHYSIOLOGY; DOSE-RESPONSE RELATIONSHIP, DRUG; DRINKING; EATING/PHYSIOLOGY; ENERGY INTAKE; FEMALE; FOOD PREFERENCES/PHYSIOLOGY; GASTRIC BYPASS; GENE EXPRESSION REGULATION/PHYSIOLOGY; GLUCAGON-LIKE PEPTIDE 1/BLOOD; HUMANS; INTESTINE, SMALL/METABOLISM; MALE; OBESITY/PHYSIOPATHOLOGY/SURGERY; PAIN MEASUREMENT; PEPTIDE YY/BLOOD; RNA…	ANALYSIS OF VARIANCE;ANIMALS;BODY WEIGHT/PHYSIOLOGY;CHOICE BEHAVIOR/PHYSIOLOGY;DOSE-RESPONSE RELATIONSHIP, DRUG;DRINKING;EATING/PHYSIOLOGY;ENERGY INTAKE;FEMALE;FOOD PREFERENCES/PHYSIOLOGY;GASTRIC BYPASS;GENE EXPRESSION REGULATION/PHYSIOLOGY;GLUCAGON-LIKE PEPTIDE 1/BLOOD;HUMANS;INTESTINE, SMALL/METABOLISM;MALE;OBESITY/PHYSIOPATHOLOGY/SURGERY;PAIN MEASUREMENT;PEPTIDE YY/BLOOD;RNA, MESSENGER/METABOL…	DEPARTMENT OF INVESTIGATIVE MEDICINE, IMPERIAL WEIGHT CENTRE, IMPERIAL COLLEGE LONDON, LONDON, UK.;	ROUX-EN-Y GASTRIC BYPASS (GASTRIC BYPASS) PATIENTS REPORTEDLY HAVE CHANGES IN PERCEPTION AND CONSUMPTION OF SWEET-TASTING FOODS. THIS STUDY AIMED TO FURTHER INVESTIGATE ALTERATIONS IN SWEET FOOD INTAKE IN RATS AND SUCROSE DETECTION IN HUMANS AFTER GASTRIC BYPASS. WISTAR RATS WERE RANDOMIZED TO GASTRIC BYPASS OR SHAM-OPERATIONS AND PREFERENCE FOR SUCROSE (SWEET), SODIUM CHLORIDE (SALTY), CITRIC AC…			1873-507X (ELECTRONIC) 0031-9384 (LINKING)		PHYSIOLOGY & BEHAVIOR	ENG		709-21			162	BUETER M;MIRAS A;CHICHGER H;FENSKE W;GHATEI M;BLOOM S;UNWIN R;LUTZ T;SPECTOR A;LE R C	10.1016/J.PHYSBEH.2011.07.025	ALTERATIONS OF SUCROSE PREFERENCE AFTER ROUXENY GASTRIC BYPASS	1	2011	BUETER, M;MIRAS, A D;CHICHGER, H;FENSKE, W;GHATEI, M A;BLOOM, S R;UNWIN, R J;LUTZ, T A;SPECTOR, A C;LE ROUX, C W		Analysis of Variance;Animals;Body Weight/physiology;Choice Behavior/physiology;Dose-Response Relationship, Drug;Drinking;Eating/physiology;Energy Intake;Female;Food Preferences/physiology;Gastric Bypass;Gene Expression Regulation/physiology;Glucagon-Like Peptide 1/blood;Humans;Intestine, Small/metabolism;Male;Obesity/physiopathology/surgery;Pain Measurement;Peptide YY/blood;RNA, Messenger/metabol…	IMPERIAL COLLEGE LONDON	BUETER M, 2011, PHYSIOL BEHAV		PUBMED
LEFT-VENTRICULAR MASS; BARIATRIC SURGERY; MORBID-OBESITY; METABOLIC; SYNDROME; MORTALITY; IMPACT; HYPOGLYCEMIA; HYPERTENSION; ALBUMINURIA; HYPERTROPHY	LEFT-VENTRICULAR MASS; BARIATRIC SURGERY; MORBID-OBESITY; METABOLIC; SYNDROME; MORTALITY; IMPACT; HYPOGLYCEMIA; HYPERTENSION; ALBUMINURIA; HYPERTROPHY	HOFSO, D (CORRESPONDING AUTHOR), VESTFOLD HOSP TRUST, MORBID OBES CTR, DEPT MED, POB 2168, N-3103 TONSBERG, NORWAY.; HOFSO, D.; NORDSTRAND, N.; JOHNSON, L. K.; KARLSEN, T. I.; SANDBU, R.; ROISLIEN, J.; HJELMESAETH, J., VESTFOLD HOSP TRUST, MORBID OBES CTR, DEPT MED, N-3103 TONSBERG, NORWAY.; KARLSEN, T. I., EVJEKLINIKKEN AS, N-4735 EVJE, NORWAY.; HAGER, H., VESTFOLD HOSP TRUST, DEPT CLIN CHEM, N-…	OBJECTIVE: WEIGHT REDUCTION IMPROVES SEVERAL OBESITY-RELATED HEALTH CONDITIONS. WE AIMED TO COMPARE THE EFFECT OF BARIATRIC SURGERY AND COMPREHENSIVE LIFESTYLE INTERVENTION ON TYPE 2 DIABETES AND OBESITY-RELATED CARDIOVASCULAR RISK FACTORS. DESIGN: ONE-YEAR CONTROLLED CLINICAL TRIAL (CLINICALTRIALS.GOV IDENTIFIER NCT00273104). METHODS: MORBIDLY OBESE SUBJECTS (19-66 YEARS, MEAN (S. D.) BODY MASS …	STARLING HOUSE, 1600 BRISTOL PARKWAY N, BRISTOL, ENGLAND	UIT THE ARCTIC UNIVERSITY OF TROMSO; UNIVERSITY OF OSLO; NATIONAL HOSPITAL NORWAY; UNIVERSITY OF OSLO; NATIONAL HOSPITAL NORWAY; UNIVERSITY OF OSLO; UNIVERSITY OF OSLO	0804-4643	EUR. J. ENDOCRINOL.	EUROPEAN JOURNAL OF ENDOCRINOLOGY	ENGLISH	HOFSO, DAG/0000-0002-8877-1162 ROISLIEN, JO/0000-0002-7168-2833	735-745	BIOSCIENTIFICA LTD	ENDOCRINOLOGY \& METABOLISM	160	HOFSO D;NORDSTRAND N;JOHNSON L;KARLSEN T;HAGER H;JENSSEN T;BOLLERSLEV J;GODANG K;SANDBU ;R. R;ROISLIEN J;HJELMESAETH J	10.1530/EJE-10-0514	OBESITYRELATED CARDIOVASCULAR RISK FACTORS AFTER WEIGHT LOSS: A CLINICAL TRIAL COMPARING GASTRIC BYPASS SURGERY AND INTENSIVE LIFESTYLE INTERVENTION	1	2010	HOFSO D;NORDSTRAND N;JOHNSON L K;KARLSEN T I; HAGER H;JENSSEN T;BOLLERSLEV J;GODANG K;SANDBU; R;ROISLIEN J;HJELMESAETH J	HOFSO, D (CORRESPONDING AUTHOR), VESTFOLD HOSP TRUST, MORBID OBES CTR, DEPT MED, POB 2168, N-3103 TONSBERG, NORWAY		MORBID OBES CTR;MORBID OBES CTR;VESTFOLD HOSP TRUST;UNIV TROMSO;OSLO UNIV HOSP;OSLO UNIV HOSP;UNIV OSLO;UNIV OSLO	HOFSO D, 2010, EUR J ENDOCRINOL		ISI
DIABETES MELLITUS; GLUCOSE HOMEOSTASIS; GUT HORMONE; INSULIN; LAPAROSCOPIC GASTRIC BYPASS; LAPAROSCOPIC SLEEVE GASTRECTOMY; ADIPOKINES; ADULT; AREA UNDER CURVE; BLOOD GLUCOSE; CHOLECYSTOKININ; TYPE 2; FEMALE; GASTRECTOMY; GASTRIC BYPASS; GHRELIN; GLUCAGON-LIKE PEPTIDE 1; GLUCOSE TOLERANCE TEST; HEMOGLOBIN A; GLYCOSYLATED; HOMEOSTASIS; HORMONES; HUMANS; LAPAROSCOPY; LEPTIN; MALE; MIDDLE AGED; OBES…	ADIPOKINES; ADULT; AREA UNDER CURVE; BLOOD GLUCOSE; CHOLECYSTOKININ; DIABETES MELLITUS; TYPE 2; FEMALE; GASTRECTOMY; GASTRIC BYPASS; GHRELIN; GLUCAGON-LIKE PEPTIDE 1; GLUCOSE TOLERANCE TEST; HEMOGLOBIN A; GLYCOSYLATED; HOMEOSTASIS; HORMONES; HUMANS; LAPAROSCOPY; LEPTIN; MALE; MIDDLE AGED; OBESITY; MORBID; PEPTIDE YY; POSTPRANDIAL PERIOD; RESISTIN; TREATMENT OUTCOME; WEIGHT LOSS; CHOLECYSTOKININ; …	DEPARTMENT OF SURGERY, MIN-SHENG GENERAL HOSPITAL, TAOYUAN, TAIWAN; FACULTY OF MEDICINE, NATIONAL YANG-MING UNIVERSITY, SCHOOL OF MEDICINE, TAIPEI, TAIWAN; DIVISION OF GASTROENTEROLOGY, DEPARTMENT OF MEDICINE, TAIPEI VETERANS GENERAL HOSPITAL, TAIPEI 112, 201, SECTION 2, SHIH-PAI ROAD, TAIWAN; DEPARTMENT OF INTERNAL MEDICINE, MIN-SHENG GENERAL HOSPITAL, TAOYUAN, TAIWAN; DEPARTMENT OF NURSING, MIN…	BACKGROUND: LAPAROSCOPIC GASTRIC BYPASS (GB) IS REPORTEDLY MORE EFFECTIVE THAN LAPAROSCOPIC SLEEVE GASTRECTOMY (SG) IN THE TREATMENT OF PATIENTS WITH A LOW BODY MASS INDEX AND TYPE 2 DIABETES MELLITUS. HOWEVER, THE MECHANISM REMAINS SPECULATIVE. WE COMPARED THE POSTPRANDIAL GUT HORMONE PATTERNS BETWEEN PATIENTS UNDERGOING LAPAROSCOPIC GB AND LAPAROSCOPIC SG AT 2 YEARS AFTER SURGERY IN A HOSPITAL-…			18787533	SURG. OBES. RELAT. DIS.	SURGERY FOR OBESITY AND RELATED DISEASES	ENGLISH		683 – 690			156	LEE W;CHEN C;CHONG K;LEE Y;CHEN S;LEE S	10.1016/j.soard.2011.07.009	CHANGES IN POSTPRANDIAL GUT HORMONES AFTER METABOLIC SURGERY: A COMPARISON OF GASTRIC BYPASS AND SLEEVE GASTRECTOMY	2	2011	LEE WEI-JEI;CHEN CHIH-YEN;CHONG KEONG;LEE YI-CHIH;CHEN SHU-CHUN;LEE SHOU-DONG	C.-Y. CHEN; DIVISION OF GASTROENTEROLOGY, DEPARTMENT OF MEDICINE, TAIPEI VETERANS GENERAL HOSPITAL, TAIPEI 112, 201, SECTION 2, SHIH-PAI ROAD, TAIWAN; EMAIL: CHENCY@VGHTPE.GOV.TW	Diabetes mellitus; Glucose homeostasis; Gut hormone; Insulin; Laparoscopic gastric bypass; Laparoscopic sleeve gastrectomy	MIN-SHENG GENERAL HOSPITAL;NATIONAL YANG-MING UNIVERSITY;TAIPEI VETERANS GENERAL HOSPITAL;MIN-SHENG GENERAL HOSPITAL;MIN-SHENG GENERAL HOSPITAL	LEE W, 2011, SURG OBES RELAT DIS	https://www.scopus.com/inward/record.uri?eid=2-s2.0-81155130702&doi=10.1016%2fj.soard.2011.07.009&partnerID=40&md5=59513ea212e2ab9c8835f7330bfd717c	SCOPUS
GLUCOSE METABOLISM; GUT HORMONES; ROUX-EN-Y GASTRIC BYPASS; SLEEVE GASTRECTOMY; ADOLESCENT; ADULT; BIOLOGICAL MARKERS; BLOOD GLUCOSE; BODY MASS INDEX; FEMALE; FOLLOW-UP STUDIES; GASTRECTOMY; GASTRIC BYPASS; GASTROINTESTINAL HORMONES; HUMANS; LAPAROSCOPY; MIDDLE AGED; OBESITY; POSTOPERATIVE PERIOD; PROSPECTIVE STUDIES; RADIOIMMUNOASSAY; TIME FACTORS; TREATMENT OUTCOME; YOUNG ADULT; BIOLOGICAL MARK…	ADOLESCENT; ADULT; BIOLOGICAL MARKERS; BLOOD GLUCOSE; BODY MASS INDEX; FEMALE; FOLLOW-UP STUDIES; GASTRECTOMY; GASTRIC BYPASS; GASTROINTESTINAL HORMONES; HUMANS; LAPAROSCOPY; MIDDLE AGED; OBESITY; POSTOPERATIVE PERIOD; PROSPECTIVE STUDIES; RADIOIMMUNOASSAY; TIME FACTORS; TREATMENT OUTCOME; YOUNG ADULT; BIOLOGICAL MARKER; GASTROINTESTINAL HORMONE; ADOLESCENT; ADULT; ARTICLE; BLOOD; BODY MASS; CLIN…	SECTION OF GASTROINTESTINAL SURGERY, INSTITUT DE RECERCA HOSPITAL DEL MAR (IMIM-HOSPITAL DEL MAR), HOSPITAL UNIVERSITARI DEL MAR, 08003 BARCELONA, PASSEIG MARÍTIM 25-29, SPAIN; ENDOCRINOLOGY AND NUTRITION UNIT, HOSPITAL UNIVERSITARI DEL MAR, BARCELONA, SPAIN; DEPARTMENT OF MEDICINE, UNIVERSITAT AUTÒNOMA DE BARCELONA, CERDANYOLA DEL VALLES, SPAIN; SERVICE OF ANAESTHESIOLOGY, HOSPITAL UNIVERSITARI …	BACKGROUND: LAPAROSCOPIC ROUX-EN-Y GASTRIC BYPASS (LRYGB) IS THE MOST COMMON BARIATRIC TECHNIQUE. LAPAROSCOPIC SLEEVE GASTRECTOMY (LSG) IS A RESTRICTIVE PROCEDURE; THE METABOLIC AND ENDOCRINE EFFECTS OF WHICH REMAIN UNKNOWN. WE COMPARED THE EFFECTS OF BOTH PROCEDURES ON GLUCOSE METABOLISM AND FASTING AND MEAL-STIMULATED GUT HORMONE LEVELS. METHODS: SEVEN PATIENTS WERE RANDOMISED TO LRYGB AND EIGH…			1091255X	J. GASTROINTEST. SURG.	JOURNAL OF GASTROINTESTINAL SURGERY	ENGLISH		1116 – 1122			156	RAMÓN J;SALVANS S;CROUS X;PUIG S;GODAY A;BENAIGES D;TRILLO L;PERA M;GRANDE L	10.1007/s11605-012-1855-0	EFFECT OF ROUXENY GASTRIC BYPASS VS SLEEVE GASTRECTOMY ON GLUCOSE AND GUT HORMONES: A PROSPECTIVE RANDOMISED TRIAL	1	2012	RAMÓN JOSÉ MANUEL;SALVANS SILVIA;CROUS XENIA;PUIG SONIA;GODAY ALBERT;BENAIGES DAVID;TRILLO LOURDES;PERA MANUEL;GRANDE LUIS	J. M. RAMÓN; SECTION OF GASTROINTESTINAL SURGERY, INSTITUT DE RECERCA HOSPITAL DEL MAR (IMIM-HOSPITAL DEL MAR), HOSPITAL UNIVERSITARI DEL MAR, 08003 BARCELONA, PASSEIG MARÍTIM 25-29, SPAIN; EMAIL: JRAMON@PARCDESALUTMAR.CAT	Glucose metabolism; Gut hormones; Roux-en-Y gastric bypass; Sleeve gastrectomy	HOSPITAL UNIVERSITARI DEL MAR;HOSPITAL UNIVERSITARI DEL MAR;UNIVERSITAT AUTÒNOMA DE BARCELONA;HOSPITAL UNIVERSITARI DEL MAR	RAMÓN J, 2012, J GASTROINTEST SURG	https://www.scopus.com/inward/record.uri?eid=2-s2.0-84861719742&doi=10.1007%2fs11605-012-1855-0&partnerID=40&md5=f47c9c093c346a467884c29a658877e8	SCOPUS
ADULT; BLOOD GLUCOSE/METABOLISM; BODY COMPOSITION; CALORIC RESTRICTION; FASTING; FEMALE; GASTRIC BYPASS; GASTRIC INHIBITORY POLYPEPTIDE/BLOOD; GLUCAGON-LIKE PEPTIDE 1/BLOOD; GLUCOSE CLAMP TECHNIQUE; HUMANS; INSULIN/BLOOD; MALE; MIDDLE AGED; OBESITY, MORBID/BLOOD/DIET THERAPY/SURGERY; WEIGHT LOSS	ADULT;BLOOD GLUCOSE/METABOLISM;BODY COMPOSITION;CALORIC RESTRICTION;FASTING;FEMALE;GASTRIC BYPASS;GASTRIC INHIBITORY POLYPEPTIDE/BLOOD;GLUCAGON-LIKE PEPTIDE 1/BLOOD;GLUCOSE CLAMP TECHNIQUE;HUMANS;INSULIN/BLOOD;MALE;MIDDLE AGED;OBESITY, MORBID/BLOOD/DIET THERAPY/SURGERY;WEIGHT LOSS	DEPARTMENT OF SURGERY, UNIVERSITY OF CALIFORNIA SAN FRANCISCO, SAN FRANCISCO, CA, USA.; CAMPOS@SURGERY.;WISC.;EDU	INTRODUCTION: ALTERED GUT AND PANCREATIC HORMONE SECRETION MAY BOLSTER RESOLUTION OF INSULIN RESISTANCE AFTER ROUX-EN-Y GASTRIC BYPASS (RYGB), BUT THE INDEPENDENT EFFECTS OF WEIGHT LOSS AND HORMONAL SECRETION ON PERIPHERAL GLUCOSE DISPOSAL ARE UNKNOWN. METHODS: TWO GROUPS OF NONDIABETIC MORBIDLY OBESE PATIENTS WERE STUDIED: RYGB FOLLOWED BY STANDARDIZED CALORIC RESTRICTION (RYGB, N = 12) OR CALOR…			1873-4626 (ELECTRONIC) 1091-255X (PRINT) 1091-255X (LINKING)		JOURNAL OF GASTROINTESTINAL SURGERY : OFFICIAL JOURNAL OF THE SOCIETY FOR SURGERY OF THE ALIMENTARY TRACT	ENG		15-23			153	CAMPOS G;RABL C;PEEVA S;CIOVICA R;RAO M;SCHWARZ J;HAVEL P;SCHAMBELAN M;MULLIGAN K	10.1007/S11605-009-1060-Y	IMPROVEMENT IN PERIPHERAL GLUCOSE UPTAKE AFTER GASTRIC BYPASS SURGERY IS OBSERVED ONLY AFTER SUBSTANTIAL WEIGHT LOSS HAS OCCURRED AND CORRELATES WITH THE MAGNITUDE OF WEIGHT LOST	1	2010	CAMPOS, GUILHERME M;RABL, CHARLOTTE;PEEVA, SOFIA;CIOVICA, RUXANDRA;RAO, MADHU;SCHWARZ, JEAN-MARC;HAVEL, PETER;SCHAMBELAN, MORRIS;MULLIGAN, KATHLEEN		Adult;Blood Glucose/metabolism;Body Composition;Caloric Restriction;Fasting;Female;Gastric Bypass;Gastric Inhibitory Polypeptide/blood;Glucagon-Like Peptide 1/blood;Glucose Clamp Technique;Humans;Insulin/blood;Male;Middle Aged;Obesity, Morbid/blood/diet therapy/surgery;Weight Loss	UNIVERSITY OF CALIFORNIA SAN FRANCISCO	CAMPOS G, 2010, J GASTROINTEST SURG		PUBMED
ADULT; ALCOHOL DRINKING; ALCOHOL-RELATED DISORDERS; BODY MASS INDEX; CASE-CONTROL STUDIES; FEMALE; FOLLOW-UP STUDIES; GASTRIC BYPASS; GASTROPLASTY; HUMANS; INCIDENCE; MALE; MIDDLE AGED; OBESITY; POSTOPERATIVE CARE; PROSPECTIVE STUDIES; SWEDEN; ALCOHOL ABUSE; ALCOHOL CONSUMPTION; ALCOHOL USE DISORDER; ARTICLE; BARIATRIC SURGERY; CONTROLLED CLINICAL TRIAL; CONTROLLED STUDY; DISEASE ASSOCIATION; FOL…	ADULT; ALCOHOL DRINKING; ALCOHOL-RELATED DISORDERS; BODY MASS INDEX; CASE-CONTROL STUDIES; FEMALE; FOLLOW-UP STUDIES; GASTRIC BYPASS; GASTROPLASTY; HUMANS; INCIDENCE; MALE; MIDDLE AGED; OBESITY; POSTOPERATIVE CARE; PROSPECTIVE STUDIES; SWEDEN; ALCOHOL ABUSE; ALCOHOL CONSUMPTION; ALCOHOL USE DISORDER; ARTICLE; BARIATRIC SURGERY; CONTROLLED CLINICAL TRIAL; CONTROLLED STUDY; DISEASE ASSOCIATION; FEM…	DEPARTMENT OF MOLECULAR AND CLINICAL MEDICINE, INSTITUTE OF MEDICINE, SAHLGRENSKA ACADEMY AT GOTHENBURG UNIVERSITY, SE-41345 ST.GOTHENBURG, SWEDEN; DEPARTMENT OF CHRONIC DISEASE PREVENTION, NATIONAL INSTITUTE FOR HEALTH AND WELFARE, FI-00271 HELSINKI, FINLAND; FOOD DATA DIVISION, NATIONAL FOOD AGENCY, SE-75126 UPPSALA, SWEDEN; DEPARTMENT OF SURGERY, INSTITUTE OF CLINICAL SCIENCES, SAHLGRENSKA ACA…	OBJECTIVE INCREASED SENSITIVITY TO ALCOHOL AFTER GASTRIC BYPASS HAS BEEN DESCRIBED. THE AIM OF THIS STUDY WAS TO INVESTIGATE WHETHER BARIATRIC SURGERY IS ASSOCIATED WITH ALCOHOL PROBLEMS. DESIGN AND METHODS THE PROSPECTIVE, CONTROLLED SWEDISH OBESE SUBJECTS (SOS) STUDY ENROLLED 2,010 OBESE PATIENTS WHO UNDERWENT BARIATRIC SURGERY (68% VERTICAL BANDED GASTROPLASTY (VBG), 19% BANDING, AND 13% GASTR…			1930739X	OBESITY	OBESITY	ENGLISH		2444 – 2451			151	SVENSSON P;ANVEDEN ;ROMEO S;PELTONEN M;AHLIN S;BURZA M;CARLSSON B;JACOBSON P;LINDROOS A;LÖNROTH H;MAGLIO C;NÄSLUND I;SJÖHOLM K;WEDEL H;SÖDERPALM B;SJÖSTRÖM L;CARLSSON L	10.1002/oby.20397	ALCOHOL CONSUMPTION AND ALCOHOL PROBLEMS AFTER BARIATRIC SURGERY IN THE SWEDISH OBESE SUBJECTS STUDY	1	2013	SVENSSON PER-ARNE;ANVEDEN ÅSA;ROMEO STEFANO;PELTONEN MARKKU;AHLIN SOFIE;BURZA MARIA ANTONELLA;CARLSSON BJÖRN;JACOBSON PETER;LINDROOS ANNA-KARIN;LÖNROTH HANS;MAGLIO CRISTINA;NÄSLUND INGMAR;SJÖHOLM KAJSA;WEDEL HANS;SÖDERPALM BO;SJÖSTRÖM LARS;CARLSSON LENA MS	L. SJÖSTRÖM; DEPARTMENT OF MOLECULAR AND CLINICAL MEDICINE, INSTITUTE OF MEDICINE, SAHLGRENSKA ACADEMY AT GOTHENBURG UNIVERSITY, SE-41345 ST.GOTHENBURG, SWEDEN; EMAIL: LARS.V.SJOSTROM@MEDFAK.GU.SE		SAHLGRENSKA ACADEMY AT GOTHENBURG UNIVERSITY;NATIONAL INSTITUTE FOR HEALTH AND WELFARE;SAHLGRENSKA ACADEMY AT GOTHENBURG UNIVERSITY;UNIVERSITY HOSPITAL;NORDIC SCHOOL OF PUBLIC HEALTH;SAHLGRENSKA ACADEMY AT GOTHENBURG UNIVERSITY	SVENSSON P, 2013, OBESITY	https://www.scopus.com/inward/record.uri?eid=2-s2.0-84889689974&doi=10.1002%2foby.20397&partnerID=40&md5=c48d077b9b3193d063bf1a90cbc3e304	SCOPUS
BARIATRIC SURGERY; LAPAROSCOPY; SLEEVE GASTRECTOMY; GASTRIC BYPASS; QUALITY OF LIFE; QUALITY-OF-LIFE; IMPROVEMENT	QUALITY-OF-LIFE; BARIATRIC SURGERY; IMPROVEMENT	QIN, MF (CORRESPONDING AUTHOR), TIANJIN MED UNIV, NANKAI HOSP, CTR MINIMALLY INVAS SURG, 122 SAN WEI RD, TIANJIN 300100, PEOPLES R CHINA.; ZHANG, YONG; ZHAO, HONGZHI; CAO, ZHANGUO; SUN, XIANGYU; ZHANG, CHEN; CAI, WANG; QIN, MINGFANG, TIANJIN MED UNIV, NANKAI HOSP, CTR MINIMALLY INVAS SURG, TIANJIN 300100, PEOPLES R CHINA.; ZHANG, YONG, INNER MONGOLIA PEOPLES HOSP, INNER MONGOLIA HOHHOT, PEOPLES R…	NO RANDOMIZED COMPARATIVE TRIALS HAVE PRESENTED LONG-TERM OUTCOMES FOR LAPAROSCOPIC SLEEVE GASTRECTOMY (LSG) AND LAPAROSCOPIC ROUX-EN-Y GASTRIC BYPASS (LRYGB). THE PRESENT STUDY WAS DESIGNED TO COMPARE THE EFFICACY AND SAFETY OF THESE TWO PROCEDURES. FROM JANUARY 2007 TO JULY 2008, 64 ELIGIBLE PATIENTS WERE RANDOMLY ASSIGNED TO LSG OR LRYGB. DURING THE 5-YEAR FOLLOW-UP, WE COMPARED MORBIDITY RATE…	233 SPRING ST, NEW YORK, NY 10013 USA	TIANJIN MEDICAL UNIVERSITY; CHINESE PEOPLE'S LIBERATION ARMY GENERAL HOSPITAL; SHANDONG UNIVERSITY	0960-8923	OBES. SURG.	OBESITY SURGERY	ENGLISH		1617-1624	SPRINGER	SURGERY	150	ZHANG Y;ZHAO H;CAO Z;SUN X;ZHANG C;CAI W;LIU R;HU S;QIN ;MINGFANG M	10.1007/s11695-014-1258-2	A RANDOMIZED CLINICAL TRIAL OF LAPAROSCOPIC ROUXENY GASTRIC BYPASS AND SLEEVE GASTRECTOMY FOR THE TREATMENT OF MORBID OBESITY IN CHINA: A 5YEAR OUTCOME	2	2014	ZHANG YONG;ZHAO HONGZHI;CAO ZHANGUO;SUN XIANGYU; ZHANG CHEN;CAI WANG;LIU RONG;HU SANYUAN;QIN; MINGFANG	QIN, MF (CORRESPONDING AUTHOR), TIANJIN MED UNIV, NANKAI HOSP, CTR MINIMALLY INVAS SURG, 122 SAN WEI RD, TIANJIN 300100, PEOPLES R CHINA	Bariatric surgery; Laparoscopy; Sleeve gastrectomy; Gastric bypass; Quality of life	TIANJIN MED UNIV;TIANJIN MED UNIV;INNER MONGOLIA PEOPLES HOSP;CHINESE PEOPLES LIBERAT ARMY GEN HOSP;SHANDONG UNIV	ZHANG Y, 2014, OBES SURG		ISI
APPETITE; BARIATRIC SURGERY; DOUBLE-BLIND METHOD; GASTRECTOMY; GASTRIC BYPASS; GHRELIN; HUMANS; PEPTIDE YY; PROSPECTIVE STUDIES; WEIGHT LOSS; ARTICLE; BLOOD; CLINICAL TRIAL; COMPARATIVE STUDY; CONTROLLED CLINICAL TRIAL; CONTROLLED STUDY; DOUBLE BLIND PROCEDURE; HUMAN; METHODOLOGY; PHYSIOLOGY; PROSPECTIVE STUDY; RANDOMIZED CONTROLLED TRIAL; STOMACH BYPASS; WEIGHT REDUCTION	APPETITE; BARIATRIC SURGERY; DOUBLE-BLIND METHOD; GASTRECTOMY; GASTRIC BYPASS; GHRELIN; HUMANS; PEPTIDE YY; PROSPECTIVE STUDIES; WEIGHT LOSS; GHRELIN; PEPTIDE YY; APPETITE; ARTICLE; BARIATRIC SURGERY; BLOOD; CLINICAL TRIAL; COMPARATIVE STUDY; CONTROLLED CLINICAL TRIAL; CONTROLLED STUDY; DOUBLE BLIND PROCEDURE; GASTRECTOMY; HUMAN; METHODOLOGY; PHYSIOLOGY; PROSPECTIVE STUDY; RANDOMIZED CONTROLLED T…	DEPARTMENT OF INTERNAL MEDICINE, UNIVERSITY OF PATRAS, SCHOOL OF MEDICINE, 26500 PATRAS, GREECE	BACKGROUND: BARIATRIC SURGERY IS CURRENTLY THE MOST EFFECTIVE TREATMENT IN MORBIDLY OBESE PATIENTS, LEADING TO DURABLE WEIGHT LOSS. OBJECTIVE: IN THIS PROSPECTIVE DOUBLE BLIND STUDY, WE AIM TO EVALUATE AND COMPARE THE EFFECTS OF LAPAROSCOPIC ROUX-EN-Y GASTRIC BYPASS (LRYGBP) WITH LAPAROSCOPIC SLEEVE GASTRECTOMY (LSG) ON BODY WEIGHT, APPETITE, FASTING, AND POSTPRANDIAL GHRELIN AND PEPTIDE- YY (PYY…			15281140	ANN. SURG.	ANNALS OF SURGERY	ENGLISH		401 – 407			149	KARAMANAKOS S;VAGENAS K;KALFARENTZOS F;ALEXANDRIDES T	10.1097/SLA.0b013e318156f012	WEIGHT LOSS APPETITE SUPPRESSION AND CHANGES IN FASTING AND POSTPRANDIAL GHRELIN AND PEPTIDEYY LEVELS AFTER ROUXENY GASTRIC BYPASS AND SLEEVE GASTRECTOMY A PROSPECTIVE DOUBLE BLIND STUDY	2	2008	KARAMANAKOS STAVROS N;VAGENAS KONSTANTINOS;KALFARENTZOS FOTIS;ALEXANDRIDES THEODORE K	T.K. ALEXANDRIDES; DEPARTMENT OF INTERNAL MEDICINE, UNIVERSITY OF PATRAS, SCHOOL OF MEDICINE, 26500 PATRAS, GREECE; EMAIL: THALEX@MED.UPATRAS.GR		UNIVERSITY OF PATRAS	KARAMANAKOS S, 2008, ANN SURG	https://www.scopus.com/inward/record.uri?eid=2-s2.0-42249100525&doi=10.1097%2fSLA.0b013e318156f012&partnerID=40&md5=251cda37e34e46801799887c0258940c	SCOPUS
GLUCOSE-TOLERANCE; WEIGHT-LOSS; BILIOPANCREATIC DIVERSION; CALORIC; RESTRICTION; METABOLIC-CONTROL; GLYCEMIC CONTROL; MORBID-OBESITY; BODY-WEIGHT; RESISTANCE; SECRETION	GLUCOSE-TOLERANCE; WEIGHT-LOSS; BILIOPANCREATIC DIVERSION; CALORIC; RESTRICTION; METABOLIC-CONTROL; GLYCEMIC CONTROL; MORBID-OBESITY; BODY-WEIGHT; RESISTANCE; SECRETION	NANNIPIERI, M (CORRESPONDING AUTHOR), UNIV PISA, DEPT INTERNAL MED, VIA ROMA 67, I-56100 PISA, ITALY.; NANNIPIERI, M.; BALDI, S.; BARSOTTI, E.; GUARINO, D.; CAMASTRA, S.; FERRANNINI, E., UNIV PISA, DEPT INTERNAL MED, I-56100 PISA, ITALY.; ANSELMINO, M.; BELLINI, R.; BERTA, R. D., SANTA CHIARA HOSP, DIV BARIATR SURG, I-56100 PISA, ITALY.; MARI, A., CONSIGLIO NAZL RIC INST BIOMED ENGN, I-35127 PADU…	CONTEXT: BARIATRIC SURGERY CAN INDUCE REMISSION IN A HIGH PROPORTION OF SEVERELY OBESE PATIENTS WITH TYPE 2 DIABETES MELLITUS (T2DM). OBJECTIVE: OUR OBJECTIVE WAS TO INVESTIGATE PREDICTORS AND MECHANISMS OF SURGERY-INDUCED DIABETES REMISSION. PATIENTS AND SETTING: FORTY-THREE MORBIDLY OBESE SUBJECTS (BODY MASS INDEX = 45.6 +/- 5.0 KG/M(2)), 32 WITH T2DM AND 11 NONDIABETIC [NORMAL GLUCOSE TOLERANC…	2055 L ST NW, SUITE 600, WASHINGTON, DC 20036 USA	UNIVERSITY OF PISA; SANTA CHIARA HOSPITAL	0021-972X	J. CLIN. ENDOCRINOL. METAB.	JOURNAL OF CLINICAL ENDOCRINOLOGY \& METABOLISM	ENGLISH	BERTA, ROSSANA DANIELA/0000-0003-4504-1140	E1372-E1379	ENDOCRINE SOC	ENDOCRINOLOGY \& METABOLISM	149	NANNIPIERI M;MARI A;ANSELMINO M;BALDI S;BARSOTTI E;GUARINO D;CAMASTRA S;BELLINI R;BERTA ;R. D R;FERRANNINI E	10.1007/s11695-022-06051-7	THE ROLE OF ΒCELL FUNCTION AND INSULIN SENSITIVITY IN THE REMISSION OF TYPE 2 DIABETES AFTER GASTRIC BYPASS SURGERY	1	2011	NANNIPIERI M;MARI A;ANSELMINO M;BALDI S; BARSOTTI E;GUARINO D;CAMASTRA S;BELLINI R;BERTA; R D;FERRANNINI E	NANNIPIERI, M (CORRESPONDING AUTHOR), UNIV PISA, DEPT INTERNAL MED, VIA ROMA 67, I-56100 PISA, ITALY		UNIV PISA;UNIV PISA;SANTA CHIARA HOSP;CONSIGLIO NAZL RIC INST BIOMED ENGN	NANNIPIERI M, 2011, J CLIN ENDOCRINOL METAB		ISI
ADULT; BLOOD GLUCOSE; EXERCISE; FEMALE; GASTRIC BYPASS; GLUCOSE TOLERANCE TEST; HUMANS; INSULIN; INSULIN RESISTANCE; LIPID METABOLISM; MALE; MIDDLE AGED; MITOCHONDRIA; MUSCLE; OBESITY; WEIGHT LOSS; CARDIOLIPIN; DIACYLGLYCEROL; LIPID; SPHINGOLIPID; TRIACYLGLYCEROL; GLUCOSE BLOOD LEVEL; ARTICLE; CONTROLLED STUDY; ENZYME ACTIVITY; HUMAN; HUMAN TISSUE; INSULIN SENSITIVITY; INTRAVENOUS GLUCOSE TOLERAN…	ADULT; BLOOD GLUCOSE; EXERCISE; FEMALE; GASTRIC BYPASS; GLUCOSE TOLERANCE TEST; HUMANS; INSULIN; INSULIN RESISTANCE; LIPID METABOLISM; MALE; MIDDLE AGED; MITOCHONDRIA; MUSCLE; OBESITY; WEIGHT LOSS; CARDIOLIPIN; DIACYLGLYCEROL; INSULIN; LIPID; SPHINGOLIPID; TRIACYLGLYCEROL; GLUCOSE BLOOD LEVEL; INSULIN; ADULT; ARTICLE; CONTROLLED STUDY; ENZYME ACTIVITY; EXERCISE; FEMALE; HUMAN; HUMAN TISSUE; INSUL…	TRANSLATIONAL RESEARCH INSTITUTE FOR METABOLISM AND DIABETES, FLORIDA HOSPITAL, ORLANDO, FL, UNITED STATES; DIVISION OF ENDOCRINOLOGY AND METABOLISM, DEPARTMENT OF MEDICINE, UNIVERSITY OF PITTSBURGH, PITTSBURGH, PA, UNITED STATES; DEPARTMENT OF HEALTH AND PHYSICAL ACTIVITY, UNIVERSITY OF PITTSBURGH, PITTSBURGH, PA, UNITED STATES; SANFORD BURNHAM PREBYS MEDICAL DISCOVERY INSTITUTE AT LAKE NONA, OR…	BOTH ROUX-EN-Y GASTRIC BYPASS (RYGB) SURGERY AND EXERCISE CAN IMPROVE INSULIN SENSITIVITY IN INDIVIDUALS WITH SEVERE OBESITY. HOWEVER, THE IMPACT OF RYGB WITH OR WITHOUT EXERCISE ON SKELETAL MUSCLE MITOCHONDRIA, INTRAMYOCELLULAR LIPIDS, AND INSULIN SENSITIVITY INDEX (SI) IS UNKNOWN. WE CONDUCTED A RANDOMIZED EXERCISE TRIAL IN PATIENTS (N = 101) WHO UNDERWENT RYGB SURGERY AND COMPLETED EITHER A 6-…			00121797	DIABETES	DIABETES	ENGLISH		3737 – 3750	AMERICAN DIABETES ASSOCIATION INC.		147	COEN P;MENSHIKOVA E;DISTEFANO G;ZHENG D;TANNER C;STANDLEY R;HELBLING N;DUBIS G;RITOV V;XIE H;DESIMONE M;SMITH S;STEFANOVIC-RACIC M;TOLEDO F;HOUMARD J;GOODPASTER B	10.2337/db15-0809	EXERCISE AND WEIGHT LOSS IMPROVE MUSCLE MITOCHONDRIAL RESPIRATION LIPID PARTITIONING AND INSULIN SENSITIVITY AFTER GASTRIC BYPASS SURGERY	1	2015	COEN PAUL M;MENSHIKOVA ELIZABETH V;DISTEFANO GIOVANNA;ZHENG DONGHAI;TANNER CHARLES J;STANDLEY ROBERT A;HELBLING NICOLE L;DUBIS GABRIEL S;RITOV VLADIMIR B;XIE HUI;DESIMONE MARISA E;SMITH STEVEN R;STEFANOVIC-RACIC MAJA;TOLEDO FREDERICO G S;HOUMARD JOSEPH A;GOODPASTER BRET H	B.H. GOODPASTER; TRANSLATIONAL RESEARCH INSTITUTE FOR METABOLISM AND DIABETES, FLORIDA HOSPITAL, ORLANDO, UNITED STATES; EMAIL: BRET.GOODPASTER@FLHOSP.ORG		TRANSLATIONAL RESEARCH INSTITUTE FOR METABOLISM AND DIABETES;UNIVERSITY OF PITTSBURGH;UNIVERSITY OF PITTSBURGH;SANFORD BURNHAM PREBYS MEDICAL DISCOVERY INSTITUTE AT LAKE NONA;UNIVERSITY OF PITTSBURGH;EAST CAROLINA UNIVERSITY	COEN P, 2015, DIABETES	https://www.scopus.com/inward/record.uri?eid=2-s2.0-84962056389&doi=10.2337%2fdb15-0809&partnerID=40&md5=c7102a6553f20ef245c4c6fb4562327c	SCOPUS
ADOLESCENT; ADULT; FEMALE; HUMANS; MALE; METABOLIC SYNDROME X; MIDDLE AGED; OBESITY; MORBID; PROSPECTIVE STUDIES; CHOLESTEROL; GLUCOSE; HIGH DENSITY LIPOPROTEIN CHOLESTEROL; TRIACYLGLYCEROL; AGE; ARTICLE; BODY MASS; BODY WEIGHT; CHOLESTEROL BLOOD LEVEL; CLINICAL TRIAL; CONTROLLED CLINICAL TRIAL; CONTROLLED STUDY; DEMOGRAPHY; DIASTOLIC BLOOD PRESSURE; GASTRIC BANDING; GLUCOSE BLOOD LEVEL; HIGH RIS…	ADOLESCENT; ADULT; FEMALE; HUMANS; MALE; METABOLIC SYNDROME X; MIDDLE AGED; OBESITY; MORBID; PROSPECTIVE STUDIES; CHOLESTEROL; GLUCOSE; HIGH DENSITY LIPOPROTEIN CHOLESTEROL; TRIACYLGLYCEROL; ADULT; AGE; ARTICLE; BODY MASS; BODY WEIGHT; CHOLESTEROL BLOOD LEVEL; CLINICAL TRIAL; CONTROLLED CLINICAL TRIAL; CONTROLLED STUDY; DEMOGRAPHY; DIASTOLIC BLOOD PRESSURE; FEMALE; GASTRIC BANDING; GLUCOSE BLOOD …	DEPARTMENT OF SURGERY, EN-CHU KONG HOSPITAL, TAIPEI, TAIWAN; DEPARTMENT OF NURSING, EN-CHU KONG HOSPITAL, TAIPEI, TAIWAN; NATIONAL TAIWAN UNIVERSITY, TAIPEI, TAIWAN; DEPARTMENT OF SURGERY, EN-CHU KONG HOSPITAL, SAN-SHIA TOWN, TAIPEI HSIEN 237, 399 FUHSING RD, TAIWAN	HYPOTHESIS: INDIVIDUALS WITH THE METABOLIC SYNDROME (MS), A CLUSTERING OF RISK FACTORS (HIGH LEVELS OF TRIGLYCERIDES AND SERUM GLUCOSE, LOW LEVEL OF HIGH-DENSITY-LIPOPROTEIN CHOLESTEROL, HIGH BLOOD PRESSURE, ABDOMINAL OBESITY) DEFINED BY THE THIRD REPORT OF THE NATIONAL CHOLESTEROL EDUCATION PROGRAM EXPERT PANEL OF DETECTION, EVALUATION, AND TREATMENT OF HIGH BLOOD CHOLESTEROL IN ADULTS (ADULT TR…			00040010	ARCH. SURG.	ARCHIVES OF SURGERY	ENGLISH		1088 – 1092			145	LEE W;HUANG M;WANG W;LIN C;CHEN T;LAI I	10.1001/archsurg.139.10.1088	EFFECTS OF OBESITY SURGERY ON THE METABOLIC SYNDROME	2	2004	LEE WEI-JEI;HUANG MING-TE;WANG WEU;LIN CHING-MEI;CHEN TAI-CHI;LAI I-RU	W.-J. LEE; DEPARTMENT OF SURGERY, EN-CHU KONG HOSPITAL, SAN-SHIA TOWN, TAIPEI HSIEN 237, 399 FUHSING RD, TAIWAN; EMAIL: WJLEE@KM.ECK.ORG.TW		EN-CHU KONG HOSPITAL;EN-CHU KONG HOSPITAL;NATIONAL TAIWAN UNIVERSITY;EN-CHU KONG HOSPITAL	LEE W, 2004, ARCH SURG	https://www.scopus.com/inward/record.uri?eid=2-s2.0-5444247120&doi=10.1001%2farchsurg.139.10.1088&partnerID=40&md5=b7634ccad23094634151343282bc1e11	SCOPUS
ADULT; APPETITE; BODY MASS INDEX; CANDY; CASE-CONTROL STUDIES; COHORT STUDIES; DIET; REDUCING; FEEDING BEHAVIOR; FEMALE; FOOD PREFERENCES; GASTRIC BYPASS; GREAT BRITAIN; HUMANS; MALE; MIDDLE AGED; OBESITY; PATIENT COMPLIANCE; REWARD; VEGETABLES; WEIGHT LOSS; SUGAR; ARTICLE; BODY MASS; CACAO; CASE CONTROL STUDY; CLINICAL ARTICLE; COHORT ANALYSIS; CONTROLLED CLINICAL TRIAL; CONTROLLED STUDY; FAT IN…	ADULT; APPETITE; BODY MASS INDEX; CANDY; CASE-CONTROL STUDIES; COHORT STUDIES; DIET; REDUCING; FEEDING BEHAVIOR; FEMALE; FOOD PREFERENCES; GASTRIC BYPASS; GREAT BRITAIN; HUMANS; MALE; MIDDLE AGED; OBESITY; PATIENT COMPLIANCE; REWARD; VEGETABLES; WEIGHT LOSS; SUGAR; ADULT; APPETITE; ARTICLE; BODY MASS; CACAO; CASE CONTROL STUDY; CLINICAL ARTICLE; COHORT ANALYSIS; CONTROLLED CLINICAL TRIAL; CONTROL…	IMPERIAL WEIGHT CENTRE, IMPERIAL COLLEGE LONDON, LONDON, UNITED KINGDOM; MOLECULAR AND METABOLIC IMAGING GROUP, MEDICAL RESEARCH COUNCIL CLINICAL SCIENCES CENTRE, IMPERIAL COLLEGE LONDON, LONDON, UNITED KINGDOM; PSYCHOLOGY DEPARTMENT, REED COLLEGE, PORTLAND, OR, UNITED STATES; DEPARTMENT OF PSYCHOLOGY, PROGRAM IN NEUROSCIENCE, FLORIDA STATE UNIVERSITY, TALLAHASSEE, FL, UNITED STATES; CONWAY INSTI…	BACKGROUND: OBESITY IS AMONG THE LEADING CAUSES OF DISEASE AND DEATH. BARIATRIC SURGERY IS THE MOST EFFECTIVE TREATMENT OF OBESITY. THERE IS INCREASING EVIDENCE THAT AFTER GASTRIC BYPASS SURGERY, PATIENTS AND ANIMAL MODELS SHOW A DECREASED PREFERENCE FOR SWEET AND FATTY FOODS. THE UNDERLYING MECHANISM MAY INCLUDE ALTERATIONS IN TASTE FUNCTION. OBJECTIVE: WE HYPOTHESIZE THAT A GASTRIC BYPASS REDUC…			19383207	AM. J. CLIN. NUTR.	AMERICAN JOURNAL OF CLINICAL NUTRITION	ENGLISH		467 – 473			145	MIRAS A;JACKSON R;JACKSON S;GOLDSTONE A;OLBERS T;HACKENBERG T;SPECTOR A;LE R C	10.3945/ajcn.112.036921	GASTRIC BYPASS SURGERY FOR OBESITY DECREASES THE REWARD VALUE OF A SWEETFAT STIMULUS AS ASSESSED IN A PROGRESSIVE RATIO TASK	1	2012	MIRAS ALEXANDER D;JACKSON ROBERT N;JACKSON SABRINA N;GOLDSTONE ANTHONY P;OLBERS TORSTEN;HACKENBERG TIMOTHY;SPECTOR ALAN C;LE ROUX CAREL W	C.W. LE ROUX; CONWAY INSTITUTE, SCHOOL OF MEDICINE AND MEDICAL SCIENCES, UNIVERSITY COLLEGE DUBLIN, BELFIELD, DUBLIN 4, IRELAND; EMAIL: C.LEROUX@IMPERIAL.AC.UK		IMPERIAL COLLEGE LONDON;IMPERIAL COLLEGE LONDON;REED COLLEGE;FLORIDA STATE UNIVERSITY;UNIVERSITY COLLEGE DUBLIN	MIRAS A, 2012, AM J CLIN NUTR	https://www.scopus.com/inward/record.uri?eid=2-s2.0-84865320839&doi=10.3945%2fajcn.112.036921&partnerID=40&md5=0b154bc16383b92e7159f634301bc136	SCOPUS
APPETITE; APPETITE REGULATION; CROSS-OVER STUDIES; DENMARK; DIABETES MELLITUS; TYPE 2; EATING; FEMALE; GASTRIC BYPASS; GLUCAGON-LIKE PEPTIDE 1; GLUCAGON-LIKE PEPTIDE-1 RECEPTOR; HUMANS; MALE; OBESITY; MORBID; PEPTIDE FRAGMENTS; PEPTIDE YY; TREATMENT OUTCOME; WEIGHT LOSS; CHOLECYSTOKININ; DIPEPTIDYL PEPTIDASE IV; EXENDIN (9-39); GLICENTIN; GLUCAGON; GLUCAGON LIKE PEPTIDE 1; GLUCAGON LIKE PEPTIDE 1…	APPETITE; APPETITE REGULATION; CROSS-OVER STUDIES; DENMARK; DIABETES MELLITUS; TYPE 2; EATING; FEMALE; GASTRIC BYPASS; GLUCAGON-LIKE PEPTIDE 1; GLUCAGON-LIKE PEPTIDE-1 RECEPTOR; HUMANS; MALE; OBESITY; MORBID; PEPTIDE FRAGMENTS; PEPTIDE YY; TREATMENT OUTCOME; WEIGHT LOSS; CHOLECYSTOKININ; DIPEPTIDYL PEPTIDASE IV; EXENDIN (9-39); GLICENTIN; GLUCAGON; GLUCAGON LIKE PEPTIDE 1; GLUCAGON LIKE PEPTIDE 1…	DEPARTMENT OF ENDOCRINOLOGY, COPENHAGEN UNIVERSITY HOSPITAL HVIDOVRE, HVIDOVRE, DENMARK; NOVO NORDISK FOUNDATION CENTER FOR BASIC METABOLIC RESEARCH, DEPARTMENT OF BIOMEDICAL SCIENCES, UNIVERSITY OF COPENHAGEN, BLEGDAMSVEJ 3, COPENHAGEN, 2200, DENMARK; DEPARTMENT OF SURGICAL GASTROENTEROLOGY, COPENHAGEN UNIVERSITY HOSPITAL HVIDOVRE, HVIDOVRE, DENMARK; DEPARTMENT OF BIOMEDICAL SCIENCES, UNIVERSITY…	BACKGROUND/OBJECTIVES: EXAGGERATED POSTPRANDIAL SECRETION OF GLUCAGON-LIKE PEPTIDE-1 (GLP-1) AND PEPTIDE YY (PYY) MAY EXPLAIN APPETITE REDUCTION AND WEIGHT LOSS AFTER ROUX-EN-Y GASTRIC BYPASS (RYGB), BUT CAUSALITY HAS NOT BEEN ESTABLISHED. WE HYPOTHESIZED THAT FOOD INTAKE DECREASES AFTER SURGERY THROUGH COMBINED ACTIONS FROM GLP-1 AND PYY. GLP-1 ACTIONS CAN BE BLOCKED USING THE GLP-1 RECEPTOR ANT…			03070565	INT. J. OBES.	INTERNATIONAL JOURNAL OF OBESITY	ENGLISH		1699 – 1706	NATURE PUBLISHING GROUP		145	SVANE M;JØRGENSEN N;BOJSEN-MØLLER K;DIRKSEN C;NIELSEN S;KRISTIANSEN V;TORÄNG S;WEWER A N;REHFELD J;HARTMANN B;MADSBAD S;HOLST J	10.1038/ijo.2016.121	PEPTIDE YY AND GLUCAGONLIKE PEPTIDE1 CONTRIBUTE TO DECREASED FOOD INTAKE AFTER ROUXENY GASTRIC BYPASS SURGERY	1	2016	SVANE MS;JØRGENSEN NB;BOJSEN-MØLLER KN;DIRKSEN C;NIELSEN S;KRISTIANSEN VB;TORÄNG S;WEWER ALBRECHTSEN NJ;REHFELD JF;HARTMANN B;MADSBAD S;HOLST JJ	J.J. HOLST; NOVO NORDISK FOUNDATION CENTER FOR BASIC METABOLIC RESEARCH, DEPARTMENT OF BIOMEDICAL SCIENCES, UNIVERSITY OF COPENHAGEN, COPENHAGEN, BLEGDAMSVEJ 3, 2200, DENMARK; EMAIL: JJHOLST@SUND.KU.DK		COPENHAGEN UNIVERSITY HOSPITAL HVIDOVRE;UNIVERSITY OF COPENHAGEN;COPENHAGEN UNIVERSITY HOSPITAL HVIDOVRE;UNIVERSITY OF COPENHAGEN;COPENHAGEN UNIVERSITY HOSPITAL RIGSHOSPITALET	SVANE M, 2016, INT J OBES	https://www.scopus.com/inward/record.uri?eid=2-s2.0-84984607528&doi=10.1038%2fijo.2016.121&partnerID=40&md5=29bc5f41af6ed672a68c74d206830e6c	SCOPUS
BARIATRIC SURGERY; STYLE INTERVENTION; OUTCOMES; COMPLICATIONS; COMORBIDITIES; MANAGEMENT; REFLUX	BARIATRIC SURGERY; STYLE INTERVENTION; OUTCOMES; COMPLICATIONS; COMORBIDITIES; MANAGEMENT; REFLUX	SALMINEN, P (CORRESPONDING AUTHOR), TURKU UNIV HOSP, DIV DIGEST SURG \& UROL, POB 52, TURKU 20520, FINLAND.; GRONROOS, SOFIA; HELMIO, MIKA; TIUSANEN, ROOSA; OVASKA, JARI; SALMINEN, PAULINA, TURKU UNIV HOSP, DIV DIGEST SURG \& UROL, POB 52, TURKU 20520, FINLAND.; GRONROOS, SOFIA; HELMIO, MIKA; TIUSANEN, ROOSA; OVASKA, JARI; SALMINEN, PAULINA, UNIV TURKU, DEPT SURG, TURKU, FINLAND.; JUUTI, ANNE; LE…	QUESTION IS WEIGHT LOSS EQUIVALENCE AND IMPROVEMENT OF QUALITY OF LIFE SIMILAR AT 7 YEARS AFTER LAPAROSCOPIC SLEEVE GASTRECTOMY (LSG) AND LAPAROSCOPIC ROUX-EN-Y GASTRIC BYPASS (LRYGB) IN PATIENTS WITH MORBID OBESITY? FINDINGS IN THIS RANDOMIZED CLINICAL TRIAL OF 240 PATIENTS WITH MORBID OBESITY, THE 7-YEAR MEAN PERCENTAGE EXCESS WEIGHT LOSS WAS 47\% AFTER LSG VS 55\% AFTER LRYGB, A DIFFERENCE THA…	330 N WABASH AVE, STE 39300, CHICAGO, IL 60611-5885 USA	UNIVERSITY OF TURKU; UNIVERSITY OF TURKU; UNIVERSITY OF HELSINKI; HELSINKI UNIVERSITY CENTRAL HOSPITAL; UNIVERSITY OF TURKU; SEINAJOKI CENTRAL HOSPITAL; VAASA CENTRAL HOSPITAL; FINLAND NATIONAL INSTITUTE FOR HEALTH \& WELFARE; UNIVERSITY OF HELSINKI; UNIVERSITY OF TURKU; UNIVERSITY OF TURKU; SATAKUNTA CENTRAL HOSPITAL	2168-6254	JAMA SURG.	JAMA SURGERY	ENGLISH	NUUTILA, PIRJO/0000-0001-9597-338X LINTUAHO, ROOSA/0000-0002-7781-8922 SALMINEN, PAULINA/0000-0001-6435-9264	137-146	AMER MEDICAL ASSOC	SURGERY	145	GRONROOS S;HELMIO M;JUUTI A;TIUSANEN R;HURME S;LOYTTYNIEMI E;OVASKA J;LEIVONEN ;MARJA M;PEROMAA-HAAVISTO P;MAKLIN S;SINTONEN H;SAMMALKORPI H;NUUTILA P;SALMINEN P	10.1001/jamasurg.2020.5666	EFFECT OF LAPAROSCOPIC SLEEVE GASTRECTOMY VS ROUXENY GASTRIC BYPASS ON WEIGHT LOSS AND QUALITY OF LIFE AT 7 YEARS IN PATIENTS WITH MORBID OBESITY THE SLEEVEPASS RANDOMIZED CLINICAL TRIAL	2	2021	GRONROOS SOFIA;HELMIO MIKA;JUUTI ANNE;TIUSANEN ROOSA; HURME SAIJA;LOYTTYNIEMI ELIISA;OVASKA JARI;LEIVONEN; MARJA;PEROMAA-HAAVISTO PIPSA;MAKLIN SUVI;SINTONEN HARRI;SAMMALKORPI HENNA;NUUTILA PIRJO;SALMINEN PAULINA	SALMINEN, P (CORRESPONDING AUTHOR), TURKU UNIV HOSP, DIV DIGEST SURG \& UROL, POB 52, TURKU 20520, FINLAND		TURKU UNIV HOSP;TURKU UNIV HOSP;UNIV TURKU;HELSINKI UNIV HOSP;UNIV TURKU;SEINAJOKI CENT HOSP;VAASA CENT HOSP;HATANPAA CITY HOSP;NATL INST HLTH AND WELF;UNIV HELSINKI;TURKU UNIV HOSP;UNIV TURKU;SATAKUNTA CENT HOSP	GRONROOS S, 2021, JAMA SURG		ISI
BILIOPANCREATIC DIVERSION; WEIGHT-LOSS; BARIATRIC SURGERY; LIMB; MORTALITY; MORBIDITY; LIFE	BILIOPANCREATIC DIVERSION; WEIGHT-LOSS; BARIATRIC SURGERY; LIMB; MORTALITY; MORBIDITY; LIFE	SOVIK, TT (CORRESPONDING AUTHOR), OSLO UNIV HOSP AKER, DEPT GASTROINTESTINAL SURG, TRONDHEIMSVEIEN 235, N-0514 OSLO, NORWAY.; SOVIK, T. T.; KRISTINSSON, J.; SCHOU, C. F.; MALA, T., OSLO UNIV HOSP AKER, DEPT GASTROINTESTINAL SURG, N-0514 OSLO, NORWAY.; AASHEIM, E. T., OSLO UNIV HOSP AKER, DEPT MED, N-0514 OSLO, NORWAY.; SOVIK, T. T.; AASHEIM, E. T., UNIV OSLO, FAC MED, OSLO, NORWAY.; TAHA, O.; ENG…	BACKGROUND: LAPAROSCOPIC ROUX-EN-Y GASTRIC BYPASS (LRYGB) AND LAPAROSCOPIC BILIOPANCREATIC DIVERSION WITH DUODENAL SWITCH (LDS) ARE SURGICAL OPTIONS FOR SUPEROBESITY. A RANDOMIZED TRIAL WAS CONDUCTED TO EVALUATE PERIOPERATIVE (30-DAY) SAFETY AND I-YEAR RESULTS. METHODS: SIXTY PATIENTS WITH A BODY MASS INDEX (BMI) OF 50-60 KG/M(2) WERE RANDOMIZED TO LRYGB OR LDS. BMI, PERCENTAGE OF EXCESS BMI LOST…	111 RIVER ST, HOBOKEN 07030-5774, NJ USA	UNIVERSITY OF OSLO; UNIVERSITY OF OSLO; UNIVERSITY OF OSLO; SAHLGRENSKA UNIVERSITY HOSPITAL	0007-1323	BR. J. SURG.	BRITISH JOURNAL OF SURGERY	ENGLISH	BJORKMAN, SOFIA/0000-0001-9384-2562 OLBERS, TORSTEN/0000-0002-7218-3390 MALA, TOM/0000-0003-3058-4775 AASHEIM, ERLEND TUSETH/0000-0002-6246-6303	160-166	WILEY	SURGERY	144	SOVIK T;TAHA O;AASHEIM E;ENGSTROM M;KRISTINSSON J;BJOKMAN S;SCHOU C;LONROTH H;MALA T;OLBERS T	10.1002/bjs.6802	RANDOMIZED CLINICAL TRIAL OF LAPAROSCOPIC GASTRIC BYPASS VERSUS LAPAROSCOPIC DUODENAL SWITCH FOR SUPEROBESITY	1	2010	SOVIK T T;TAHA O;AASHEIM E T;ENGSTROM M; KRISTINSSON J;BJOKMAN S;SCHOU C F;LONROTH H; MALA T;OLBERS T	SOVIK, TT (CORRESPONDING AUTHOR), OSLO UNIV HOSP AKER, DEPT GASTROINTESTINAL SURG, TRONDHEIMSVEIEN 235, N-0514 OSLO, NORWAY		OSLO UNIV HOSP AKER;SCHOU;OSLO UNIV HOSP AKER;OSLO UNIV HOSP AKER;UNIV OSLO;SAHLGRENS UNIV HOSP	SOVIK T, 2010, BR J SURG		ISI
BARIATRIC SURGERY; DIABETES MELLITUS; TYPE 2; GASTRECTOMY; GASTRIC BYPASS; HUMANS; LAPAROSCOPY; LIFE STYLE; NON-ALCOHOLIC FATTY LIVER DISEASE; OBESITY; MORBID; TREATMENT OUTCOME; ADULT; AGED; ARTICLE; COMPARATIVE EFFECTIVENESS; CONTROLLED STUDY; FEMALE; HUMAN; LIFESTYLE MODIFICATION; MAJOR CLINICAL STUDY; MALE; MEDICAL CARE; MULTICENTER STUDY; NONALCOHOLIC STEATOHEPATITIS; PROSPECTIVE STUDY; RAND…	BARIATRIC SURGERY; DIABETES MELLITUS; TYPE 2; GASTRECTOMY; GASTRIC BYPASS; HUMANS; LAPAROSCOPY; LIFE STYLE; NON-ALCOHOLIC FATTY LIVER DISEASE; OBESITY; MORBID; TREATMENT OUTCOME; ADULT; AGED; ARTICLE; COMPARATIVE EFFECTIVENESS; CONTROLLED STUDY; FEMALE; HUMAN; LIFESTYLE MODIFICATION; MAJOR CLINICAL STUDY; MALE; MEDICAL CARE; MULTICENTER STUDY; NONALCOHOLIC STEATOHEPATITIS; PROSPECTIVE STUDY; RAND…	UNIVERSITÀ CATTOLICA DEL SACRO CUORE, ROME, ITALY; CNR-IASI, LABORATORIO DI BIOMATEMATICA, CONSIGLIO NAZIONALE DELLE RICERCHE, ISTITUTO DI ANALISI DEI SISTEMI ED INFORMATICA, ROME, ITALY; DEPARTMENT OF SURGICAL SCIENCES, SAPIENZA UNIVERSITY OF ROME, ROME, ITALY; DEPARTMENT OF MEDICAL AND SURGICAL SCIENCES, FONDAZIONE POLICLINICO UNIVERSITARIO A GEMELLI IRCCS, ROME, ITALY; DEPARTMENT OF PATHOLOGY …	BACKGROUND: OBSERVATIONAL STUDIES SUGGEST THAT BARIATRIC–METABOLIC SURGERY MIGHT GREATLY IMPROVE NON-ALCOHOLIC STEATOHEPATITIS (NASH). HOWEVER, THE EFFICACY OF SURGERY ON NASH HAS NOT YET BEEN COMPARED WITH THE EFFECTS OF LIFESTYLE INTERVENTIONS AND MEDICAL THERAPY IN A RANDOMISED TRIAL. METHODS: WE DID A MULTICENTRE, OPEN-LABEL, RANDOMISED TRIAL AT THREE MAJOR HOSPITALS IN ROME, ITALY. WE INCLUD…			01406736	LANCET	THE LANCET	ENGLISH		1786 – 1797	ELSEVIER B.V.		144	VERRASTRO O;PANUNZI S;CASTAGNETO-GISSEY L;DE G A;LEMBO E;CAPRISTO E;GUIDONE C;ANGELINI G;PENNESTRÌ F;SESSA L;VECCHIO F;RICCARDI L;ZOCCO M;BOSKOSKI I;CASELLA-MARIOLO J;MARINI P;POMPILI M;CASELLA G;FIORI E;RUBINO F;BORNSTEIN S;RAFFAELLI M;MINGRONE G	10.1016/S0140-6736(23)00634-7	BARIATRIC–METABOLIC SURGERY VERSUS LIFESTYLE INTERVENTION PLUS BEST MEDICAL CARE IN NONALCOHOLIC STEATOHEPATITIS (BRAVES): A MULTICENTRE OPENLABEL RANDOMISED TRIAL	2	2023	VERRASTRO ORNELLA;PANUNZI SIMONA;CASTAGNETO-GISSEY LIDIA;DE GAETANO ANDREA;LEMBO ERMINIA;CAPRISTO ESMERALDA;GUIDONE CATERINA;ANGELINI GIULIA;PENNESTRÌ FRANCESCO;SESSA LUCA;VECCHIO FABIO MARIA;RICCARDI LAURA;ZOCCO MARIA ASSUNTA;BOSKOSKI IVO;CASELLA-MARIOLO JAMES R;MARINI PIERLUIGI;POMPILI MAURIZIO;CASELLA GIOVANNI;FIORI ENRICO;RUBINO FRANCESCO;BORNSTEIN STEFAN R;RAFFAELLI MARCO;MINGRONE GELTRUDE	G. MINGRONE; SCHOOL OF CARDIOVASCULAR AND METABOLIC MEDICINE & SCIENCES, KING'S COLLEGE LONDON, LONDON, UNITED KINGDOM; EMAIL: GELTRUDE.MINGRONE@KCL.AC.UK		UNIVERSITÀ CATTOLICA DEL SACRO CUORE;ISTITUTO DI ANALISI DEI SISTEMI ED INFORMATICA;SAPIENZA UNIVERSITY OF ROME;FONDAZIONE POLICLINICO UNIVERSITARIO A GEMELLI IRCCS;FONDAZIONE POLICLINICO UNIVERSITARIO A GEMELLI IRCCS;SAN CAMILLO HOSPITAL;KING'S COLLEGE HOSPITAL;KING'S COLLEGE HOSPITAL;UNIVERSITÄTSKLINIKUM CARL GUSTAV CARUS AN DE TECHNISCHEN UNIVERSITÄT DRESDEN	VERRASTRO O, 2023, LANCET	https://www.scopus.com/inward/record.uri?eid=2-s2.0-85159265839&doi=10.1016%2fS0140-6736%2823%2900634-7&partnerID=40&md5=0c825835947d66b2099a6b2308682c5a	SCOPUS
AMINO ACIDS; ANASTOMOSIS; ROUX-EN-Y; BODY COMPOSITION; BODY MASS INDEX; BONE DENSITY; CONSTRICTION; DENSITOMETRY; X-RAY; FEMALE; GASTRIC BYPASS; HUMANS; MALE; MIDDLE AGED; OBESITY; MORBID; OSTEOCALCIN; STOMACH; DEOXYPYRIDINOLINE; PARATHYROID HORMONE; SILICONE; ABSORPTIOMETRY; ADULT; ARTICLE; BODY MASS; BONE METABOLISM; BONE MINERAL; CLINICAL ARTICLE; CLINICAL TRIAL; COMPARATIVE STUDY; CONTROLLED …	AMINO ACIDS; ANASTOMOSIS; ROUX-EN-Y; BODY COMPOSITION; BODY MASS INDEX; BONE DENSITY; CONSTRICTION; DENSITOMETRY; X-RAY; FEMALE; GASTRIC BYPASS; HUMANS; MALE; MIDDLE AGED; OBESITY; MORBID; OSTEOCALCIN; STOMACH; DEOXYPYRIDINOLINE; OSTEOCALCIN; PARATHYROID HORMONE; SILICONE; ABSORPTIOMETRY; ADULT; ARTICLE; BODY MASS; BONE METABOLISM; BONE MINERAL; CLINICAL ARTICLE; CLINICAL TRIAL; COMPARATIVE STUDY…	DIV. ENDOCRINOL., DIABET. CLIN. N., UNIVERSITY HOSPITAL BASEL, 4031 BASEL, PETERSGRABEN 4, SWITZERLAND	WEIGHT LOSS REDUCES BONE MASS AND INCREASES THE RISK OF OSTEOPOROSIS. THIS STUDY WAS UNDERTAKEN TO ASSESS CHANGES OF BONE METABOLISM FOLLOWING ROUX-EN-Y GASTRIC BYPASS (RYGB) AND ADJUSTABLE SILICONE GASTRIC BANDING (ASGB) AS COMPARED TO NONOPERATED CONTROLS OF MORBIDLY OBESE SUBJECTS. FOURTEEN FEMALE AND 5 MALE PATIENTS WITH A MEAN (±SEM) AGE OF 44.3 ± 1.8 YEARS PARTICIPATED IN THE 24-MONTH PROSP…			00260495	METAB. CLIN. EXP.	METABOLISM: CLINICAL AND EXPERIMENTAL	ENGLISH		918 – 921			141	VON M M;STOECKLI R;BILZ S;KRAENZLIN M;LANGER I;KELLER U	10.1016/j.metabol.2004.01.015	CHANGES IN BONE MINERAL CONTENT AFTER SURGICAL TREATMENT OF MORBID OBESITY	2	2004	VON MACH M-A;STOECKLI R;BILZ S;KRAENZLIN M;LANGER I;KELLER U			UNIVERSITY HOSPITAL BASEL	VON M M, 2004, METAB CLIN EXP	https://www.scopus.com/inward/record.uri?eid=2-s2.0-3042572544&doi=10.1016%2fj.metabol.2004.01.015&partnerID=40&md5=53749a064643820d9c23ff4644c5c79c	SCOPUS
BARIATRIC SURGERY; BIOCHEMICAL MARKERS OF BONE TURNOVER; CALCIUM ABSORPTION; GASTRIC BYPASS SURGERY; NUTRITION; VITAMIN D; ADULT; AGED; BONE REMODELING; CALCIUM; FEMALE; GASTRIC BYPASS; HUMANS; INTESTINAL ABSORPTION; MALE; MIDDLE AGED; CITRATE CALCIUM; COLECALCIFEROL; ERGOCALCIFEROL; 25-HYDROXYVITAMIN D; ARTICLE; BONE TURNOVER; CALCIUM BLOOD LEVEL; CALCIUM HOMEOSTASIS; CLINICAL ARTICLE; DUODENUM;…	ADULT; AGED; BONE REMODELING; CALCIUM; FEMALE; GASTRIC BYPASS; HUMANS; INTESTINAL ABSORPTION; MALE; MIDDLE AGED; VITAMIN D; CITRATE CALCIUM; COLECALCIFEROL; ERGOCALCIFEROL; 25-HYDROXYVITAMIN D; CALCIUM; VITAMIN D; ADULT; AGED; ARTICLE; BONE TURNOVER; CALCIUM ABSORPTION; CALCIUM BLOOD LEVEL; CALCIUM HOMEOSTASIS; CLINICAL ARTICLE; DUODENUM; FEMALE; HUMAN; JEJUNUM; MALABSORPTION; MALE; OBESITY; POST…	MEDICAL SERVICE, SAN FRANCISCO VETERANS AFFAIRS MEDICAL CENTER, SAN FRANCISCO, CA, UNITED STATES; DEPARTMENT OF MEDICINE, UNIVERSITY OF CALIFORNIA, SAN FRANCISCO, CA, UNITED STATES; DEPARTMENT OF NUTRITION SCIENCE, PURDUE UNIVERSITY, WEST LAFAYETTE, IN, UNITED STATES; DEPARTMENT OF EPIDEMIOLOGY AND BIOSTATISTICS, UNIVERSITY OF CALIFORNIA, SAN FRANCISCO, CA, UNITED STATES; DEPARTMENT OF SURGERY, U…	ROUX-EN-Y GASTRIC BYPASS (RYGB) SURGERY HAS NEGATIVE EFFECTS ON BONE, MEDIATED IN PART BY EFFECTS ON NUTRIENT ABSORPTION. NOT ONLY CAN RYGB RESULT IN VITAMIN D MALABSORPTION, BUT THE BYPASSED DUODENUM AND PROXIMAL JEJUNUM ARE ALSO THE PREDOMINANT SITES OF ACTIVE, TRANSCELLULAR, 1,25(OH)2D-MEDIATED CALCIUM (CA) UPTAKE. HOWEVER, CA ABSORPTION OCCURS THROUGHOUT THE INTESTINE, AND THOSE WHO UNDERGO R…			08840431	J. BONE MINER. RES.	JOURNAL OF BONE AND MINERAL RESEARCH	ENGLISH		1377 – 1385	JOHN WILEY AND SONS INC		141	SCHAFER A;WEAVER C;BLACK D;WHEELER A;CHANG H;SZEFC G;STEWART L;ROGERS S;CARTER J;POSSELT A;SHOBACK D;SELLMEYER D	10.1002/jbmr.2467	INTESTINAL CALCIUM ABSORPTION DECREASES DRAMATICALLY AFTER GASTRIC BYPASS SURGERY DESPITE OPTIMIZATION OF VITAMIN D STATUS	1	2015	SCHAFER ANNE L;WEAVER CONNIE M;BLACK DENNIS M;WHEELER AMBER L;CHANG HANLING;SZEFC GINA V;STEWART LYGIA;ROGERS STANLEY J;CARTER JONATHAN T;POSSELT ANDREW M;SHOBACK DOLORES M;SELLMEYER DEBORAH E	A.L. SCHAFER; ENDOCRINE RESEARCH UNIT, SAN FRANCISCO VETERANS AFFAIRS MEDICAL CENTER, SAN FRANCISCO, 1700 OWENS ST, 94158, UNITED STATES; EMAIL: ANNE.SCHAFER@UCSF.EDU	BARIATRIC SURGERY; BIOCHEMICAL MARKERS OF BONE TURNOVER; CALCIUM ABSORPTION; GASTRIC BYPASS SURGERY; NUTRITION; VITAMIN D	SAN FRANCISCO VETERANS AFFAIRS MEDICAL CENTER;UNIVERSITY OF CALIFORNIA;PURDUE UNIVERSITY;UNIVERSITY OF CALIFORNIA;UNIVERSITY OF CALIFORNIA;SAN FRANCISCO VETERANS AFFAIRS MEDICAL CENTER;THE JOHNS HOPKINS UNIVERSITY	SCHAFER A, 2015, J BONE MINER RES	https://www.scopus.com/inward/record.uri?eid=2-s2.0-84937162258&doi=10.1002%2fjbmr.2467&partnerID=40&md5=e70a613cb01c8b6e933b7e9e6d08c7a3	SCOPUS
ANTIFACTOR XA ACTIVITY; ENOXAPARIN THROMBOPROPHYLAXIS; ADOLESCENT; ADULT; AGED; ANTITHROMBIN III; DOSE-RESPONSE RELATIONSHIP; DRUG; DRUG ADMINISTRATION SCHEDULE; ENOXAPARIN; FEMALE; FIBRINOLYTIC AGENTS; FOLLOW-UP STUDIES; GASTRIC BYPASS; HUMANS; LAPAROSCOPY; MALE; MIDDLE AGED; OBESITY; MORBID; POSTOPERATIVE COMPLICATIONS; PROSPECTIVE STUDIES; TREATMENT OUTCOME; VENOUS THROMBOEMBOLISM; YOUNG ADULT…	ADOLESCENT; ADULT; AGED; ANTITHROMBIN III; DOSE-RESPONSE RELATIONSHIP; DRUG; DRUG ADMINISTRATION SCHEDULE; ENOXAPARIN; FEMALE; FIBRINOLYTIC AGENTS; FOLLOW-UP STUDIES; GASTRIC BYPASS; HUMANS; LAPAROSCOPY; MALE; MIDDLE AGED; OBESITY; MORBID; POSTOPERATIVE COMPLICATIONS; PROSPECTIVE STUDIES; TREATMENT OUTCOME; VENOUS THROMBOEMBOLISM; YOUNG ADULT; BLOOD CLOTTING FACTOR 10A; ENOXAPARIN; ESTROGEN; HEPA…	SUBURBAN LUNG ASSOCIATES, ELK GROVE VILLAGE, IL, UNITED STATES; ALEXIAN BROTHERS MEDICAL CENTER, ELK GROVE VILLAGE, IL, UNITED STATES; SUBURBAN SURGICAL CARE CONSULTANTS, ARLINGTON HEIGHTS, IL, UNITED STATES; GORDON AND ASSOCIATES, INCORPORATED, BERKELEY, CA, UNITED STATES; PHARMACOLOGICS, SAN FRANCISCO, CA, UNITED STATES	BACKGROUND: MORBIDLY OBESE PATIENTS UNDERGOING GASTRIC BYPASS SURGERY ARE AT RISK FOR POSTOPERATIVE VENOUS THROMBOEMBOLISM. EVIDENCE-BASED RECOMMENDATIONS REGARDING THE DOSING AND DURATION OF THROMBOPROPHYLAXIS ARE LACKING FOR MORBIDLY OBESE SURGICAL PATIENTS. THE AIMS OF THIS STUDY WERE TO EVALUATE THE SAFETY AND EFFICACY OF AN EXTENDED DURATION, BODY MASS INDEX (BMI)-STRATIFIED ENOXAPARIN THROM…			15507289	SURG. OBES. RELAT. DIS.	SURGERY FOR OBESITY AND RELATED DISEASES	ENGLISH		625 – 631			138	BORKGREN-OKONEK M;HART R;PANTANO J;RANTIS J P;GUSKE P;KANE J J;GORDON N;SAMBOL N	10.1016/j.soard.2007.11.010	ENOXAPARIN THROMBOPROPHYLAXIS IN GASTRIC BYPASS PATIENTS: EXTENDED DURATION DOSE STRATIFICATION AND ANTIFACTOR XA ACTIVITY	1	2008	BORKGREN-OKONEK MARILYN J;HART ROBERT W;PANTANO JOHN E;RANTIS JR PETER C;GUSKE PAUL J;KANE JR JAMES M;GORDON NANCY;SAMBOL NANCY C	M.J. BORKGREN-OKONEK; SUBURBAN LUNG ASSOCIATES, ELK GROVE VILLAGE, IL, UNITED STATES; EMAIL: MARILYN.BORKGREN@SUBLUNG.COM	Antifactor Xa activity; Enoxaparin thromboprophylaxis	SUBURBAN LUNG ASSOCIATES;ALEXIAN BROTHERS MEDICAL CENTER;GORDON AND ASSOCIATES	BORKGREN-OKONEK M, 2008, SURG OBES RELAT DIS	https://www.scopus.com/inward/record.uri?eid=2-s2.0-51349153010&doi=10.1016%2fj.soard.2007.11.010&partnerID=40&md5=96c718baa7ea14329f6edb58230c251c	SCOPUS
ENDOCINCH; OVERSTITCH; STOMAPHYX; DILATED ANASTOMOSIS; REOPERATIVE BARIATRIC SURGERY; LAPAROSCOPIC REVISION; STOMA; REGAIN; POUCH; EXPERIENCE; GAIN	REOPERATIVE BARIATRIC SURGERY; LAPAROSCOPIC REVISION; STOMA; REGAIN; POUCH; EXPERIENCE; GAIN	THOMPSON, CC (CORRESPONDING AUTHOR), BRIGHAM \& WOMENS HOSP, DIV GASTROENTEROL, 75 FRANCIS ST,THORN 14, BOSTON, MA 02115 USA.; THOMPSON, CHRISTOPHER C.; SLATTERY, JAMES; RYAN, MICHELE B., BRIGHAM \& WOMENS HOSP, DIV GASTROENTEROL, BOSTON, MA 02115 USA.; LAUTZ, DAVID B., BRIGHAM \& WOMENS HOSP, DEPT SURG, BOSTON, MA 02115 USA.; CHAND, BIPAN, LOYOLA UNIV, MED CTR, MAYWOOD, IL 60153 USA.; CHEN, YANG…	BACKGROUND \& AIMS: WEIGHT REGAIN OR INSUFFICIENT LOSS AFTER ROUX-EN-Y GASTRIC BYPASS (RYGB) IS COMMON. THIS IS PARTIALLY ATTRIBUTABLE TO DILATATION OF THE GASTROJEJUNOSTOMY (GJ), WHICH DIMINISHES THE RESTRICTIVE CAPACITY OF RYGB. ENDOLUMINAL INTERVENTIONS FOR GJ REDUCTION ARE BEING EXPLORED AS ALTERNATIVES TO REVISION SURGERY. WE PERFORMED A RANDOMIZED, BLINDED, SHAM-CONTROLLED TRIAL TO EVALUATE…	1600 JOHN F KENNEDY BOULEVARD, STE 1800, PHILADELPHIA, PA 19103-2899 USA	HARVARD UNIVERSITY; HARVARD UNIVERSITY MEDICAL AFFILIATES; BRIGHAM \& WOMEN'S HOSPITAL; HARVARD UNIVERSITY; HARVARD UNIVERSITY MEDICAL AFFILIATES; BRIGHAM \& WOMEN'S HOSPITAL; LOYOLA UNIVERSITY CHICAGO; UNIVERSITY OF COLORADO SYSTEM; UNIVERSITY OF COLORADO HOSPITAL; BAYLOR UNIVERSITY MEDICAL CENTER; BAYLOR UNIVERSITY; PENNSYLVANIA COMMONWEALTH SYSTEM OF HIGHER EDUCATION (PCSHE); TEMPLE UNIVERSITY…	0016-5085	GASTROENTEROLOGY	GASTROENTEROLOGY	ENGLISH	EDMUNDOWICZ, STEVEN/0000-0002-6541-3485 SCHAUER, PHILIP/0000-0002-4029-7537	129+	W B SAUNDERS CO-ELSEVIER INC	GASTROENTEROLOGY \& HEPATOLOGY	137	THOMPSON C;CHAND B;CHEN Y;DEMARCO ;DANIEL C D;MILLER L;SCHWEITZER M;ROTHSTEIN ;RICHARD I R;LAUTZ D;SLATTERY J;RYAN M;BRETHAUER S;SCHAUER P;MITCHELL M;STARPOLI A;HABER G;CATALANO M;EDMUNDOWICZ S;FAGNANT A;KAPLAN L;ROSLIN M	10.1053/j.gastro.2013.04.002	ENDOSCOPIC SUTURING FOR TRANSORAL OUTLET REDUCTION INCREASES WEIGHT LOSS AFTER ROUXENY GASTRIC BYPASS SURGERY	1	2013	THOMPSON CHRISTOPHER C;CHAND BIPAN;CHEN YANG K;DEMARCO; DANIEL C;MILLER LARRY;SCHWEITZER MICHAEL;ROTHSTEIN; RICHARD I;LAUTZ DAVID B;SLATTERY JAMES;RYAN MICHELE B;BRETHAUER STACY;SCHAUER PHILLIP;MITCHELL MACK C; STARPOLI ANTHONY;HABER GREGORY B;CATALANO MARC F; EDMUNDOWICZ STEVEN;FAGNANT ANNETTE M;KAPLAN LEE M; ROSLIN MITCHELL S	THOMPSON, CC (CORRESPONDING AUTHOR), BRIGHAM \& WOMENS HOSP, DIV GASTROENTEROL, 75 FRANCIS ST,THORN 14, BOSTON, MA 02115 USA	Endocinch; Overstitch; Stomaphyx; Dilated Anastomosis	BRIGHAM AND WOMENS HOSP;BRIGHAM AND WOMENS HOSP;BRIGHAM AND WOMENS HOSP;LOYOLA UNIV;UNIV COLORADO HOSP;BAYLOR UNIV;TEMPLE UNIV HOSP AND MED SCH;SCHWEITZER;JOHNS HOPKINS BAYVIEW MED CTR;DARTMOUTH HITCHCOCK MED CTR;SCHAUER;LENOX HILL HOSP;ST LUKES MED CTR;WASHINGTON UNIV;MGH WEIGHT CTR;MASSACHUSETTS GEN HOSP;LENOX HILL HOSP	THOMPSON C, 2013, GASTROENTEROLOGY		ISI
BRAIN; CALORIC RESTRICTION; DIABETES MELLITUS; TYPE 2; GASTRIC BYPASS; HUMANS; MAGNETIC RESONANCE IMAGING; OBESITY; MORBID; WEIGHT LOSS; GASTRIC INHIBITORY POLYPEPTIDE; GHRELIN; GLUCAGON LIKE PEPTIDE 1; HEMOGLOBIN A1C; ORAL ANTIDIABETIC AGENT; ADULT; AGED; ARTICLE; BLOOD SAMPLING; BODY WEIGHT LOSS; BOLD SIGNAL; BRAIN FUNCTION; CALORIC INTAKE; CLINICAL ARTICLE; CLINICAL TRIAL (TOPIC); DIABETIC PAT…	BRAIN; CALORIC RESTRICTION; DIABETES MELLITUS; TYPE 2; GASTRIC BYPASS; HUMANS; MAGNETIC RESONANCE IMAGING; OBESITY; MORBID; WEIGHT LOSS; GASTRIC INHIBITORY POLYPEPTIDE; GHRELIN; GLUCAGON LIKE PEPTIDE 1; HEMOGLOBIN A1C; ORAL ANTIDIABETIC AGENT; ADULT; AGED; ARTICLE; BLOOD SAMPLING; BODY WEIGHT LOSS; BOLD SIGNAL; BRAIN; BRAIN FUNCTION; CALORIC INTAKE; CLINICAL ARTICLE; CLINICAL TRIAL (TOPIC); DIABE…	DEPARTMENT OF DIGESTION, METABOLISM AND REPRODUCTION, IMPERIAL COLLEGE LONDON, LONDON, UNITED KINGDOM; INVICRO LONDON, HAMMERSMITH HOSPITAL, LONDON, UNITED KINGDOM; WEST LONDON MENTAL HEALTH NATIONAL HEALTH SERVICE TRUST, LONDON, UNITED KINGDOM; DEPARTMENT OF SURGERY AND CANCER, IMPERIAL COLLEGE HEALTHCARE NATIONAL HEALTH SERVICE TRUST, LONDON, UNITED KINGDOM	OBJECTIVE WEIGHT LOSS ACHIEVED WITH VERY-LOW-CALORIE DIETS (VLCDS) CAN PRODUCE REMISSION OF TYPE 2 DIABETES (T2D), BUT WEIGHT REGAIN VERY OFTEN OCCURS WITH REINTRODUCTION OF HIGHER CALORIE INTAKES. IN CONTRAST, BARIATRIC SURGERY PRODUCES CLINICALLY SIGNIFICANT AND DURABLE WEIGHT LOSS, WITH DIABETES REMISSION THAT TRANSLATES INTO REDUCTIONS IN MORTALITY. WE HYPOTHESIZED THAT IN PATIENTS LIVING WIT…			01495992	DIABETES CARE	DIABETES CARE	ENGLISH		1842 – 1851	AMERICAN DIABETES ASSOCIATION INC.		137	SALEM V;DEMETRIOU L;BEHARY P;ALEXIADOU K;SCHOLTZ S;THARAKAN G;MIRAS A;PURKAYASTHA S;AHMED A;BLOOM S;WALL M;DHILLO W;TAN T	10.2337/dc15-0750	WEIGHT LOSS BY LOWCALORIE DIET VERSUS GASTRIC BYPASS SURGERY IN PEOPLE WITH DIABETES RESULTS IN DIVERGENT BRAIN ACTIVATION PATTERNS: A FUNCTIONAL MRI STUDY	1	2021	SALEM VICTORIA;DEMETRIOU LYSIA;BEHARY PREESHILA;ALEXIADOU KLEOPATRA;SCHOLTZ SAMANTHA;THARAKAN GEORGE;MIRAS ALEXANDER D;PURKAYASTHA SANJAY;AHMED AHMED R;BLOOM STEPHEN R;WALL MATTHEW B;DHILLO WALJIT S;TAN TRICIA M-M	T.M.-M. TAN; DEPARTMENT OF DIGESTION, METABOLISM AND REPRODUCTION, IMPERIAL COLLEGE LONDON, LONDON, UNITED KINGDOM; EMAIL: T.TAN@IMPERIAL.AC.UK		IMPERIAL COLLEGE LONDON;HAMMERSMITH HOSPITAL;WEST LONDON MENTAL HEALTH NATIONAL HEALTH SERVICE TRUST;IMPERIAL COLLEGE HEALTHCARE NATIONAL HEALTH SERVICE TRUST	SALEM V, 2021, DIABETES CARE	https://www.scopus.com/inward/record.uri?eid=2-s2.0-85114201203&doi=10.2337%2fDC20-2641&partnerID=40&md5=9759322ff83e24019e3acc6d1e15cb65	SCOPUS
LEARNING CURVE; MORBID OBESITY; ROBOT-ASSISTED GASTRIC BYPASS; ROUX-EN-Y GASTRIC BYPASS; ADULT; ANASTOMOSIS; ROUX-EN-Y; CLINICAL COMPETENCE; FEMALE; GASTRIC BYPASS; HUMANS; LAPAROSCOPY; LENGTH OF STAY; MALE; MIDDLE AGED; OBESITY; MORBID; ROBOTICS; TREATMENT OUTCOME; ARTICLE; BARIATRIC SURGERY; BODY MASS; CLINICAL ARTICLE; CLINICAL TRIAL; COMORBIDITY; COMPETENCE; CONTROLLED CLINICAL TRIAL; CONTROL…	ADULT; ANASTOMOSIS; ROUX-EN-Y; CLINICAL COMPETENCE; FEMALE; GASTRIC BYPASS; HUMANS; LAPAROSCOPY; LENGTH OF STAY; MALE; MIDDLE AGED; OBESITY; MORBID; ROBOTICS; TREATMENT OUTCOME; ADULT; ARTICLE; BARIATRIC SURGERY; BODY MASS; CLINICAL ARTICLE; CLINICAL TRIAL; COMORBIDITY; COMPETENCE; CONTROLLED CLINICAL TRIAL; CONTROLLED STUDY; FEASIBILITY STUDY; FEMALE; HOSPITALIZATION; HUMAN; INTERMETHOD COMPARIS…	DEPARTMENT OF SURGERY, STANFORD UNIVERSITY MEDICAL CENTER, STANFORD, CA, UNITED STATES	BACKGROUND: LAPAROSCOPIC GASTRIC BYPASS IS A TECHNICALLY DEMANDING OPERATION, ESPECIALLY WHEN HAND-SEWING IS REQUIRED. ROBOTICS MAY HELP FACILITATE THE PERFORMANCE OF THIS DIFFICULT OPERATION. THIS STUDY WAS UNDERTAKEN TO COMPARE A SINGLE SURGEON'S RESULTS USING THE DAVINCI SURGICAL SYSTEM WITH THOSE USING TRADITIONAL LAPAROSCOPIC ROUX-EN-Y GASTRIC BYPASS (LRYGB) WHEN THE TECHNIQUES WERE LEARNED …			15507289	SURG. OBES. RELAT. DIS.	SURGERY FOR OBESITY AND RELATED DISEASES	ENGLISH		549 – 554			136	SANCHEZ B;MOHR C;MORTON J;SAFADI B;ALAMI R;CURET M	10.1016/j.soard.2005.08.008	COMPARISON OF TOTALLY ROBOTIC LAPAROSCOPIC ROUXENY GASTRIC BYPASS AND TRADITIONAL LAPAROSCOPIC ROUXENY GASTRIC BYPASS	1	2005	SANCHEZ BARRY R;MOHR CATHERINE J;MORTON JOHN M;SAFADI BASSEM Y;ALAMI RAMZI S;CURET MYRIAM J	M.J. CURET; DEPARTMENT OF SURGERY, STANFORD UNIVERSITY MEDICAL CENTER, STANFORD, CA, UNITED STATES; EMAIL: MCURET@STANFORD.EDU	Learning curve; Morbid obesity; Robot-assisted gastric bypass; Roux-en-Y gastric bypass	STANFORD UNIVERSITY MEDICAL CENTER	SANCHEZ B, 2005, SURG OBES RELAT DIS	https://www.scopus.com/inward/record.uri?eid=2-s2.0-33646465841&doi=10.1016%2fj.soard.2005.08.008&partnerID=40&md5=00e0adc1f40b0dd13d69ac96cc2cab71	SCOPUS
ADULT; BLOOD GLUCOSE; BODY WEIGHT; DIABETES MELLITUS; TYPE 2; FEMALE; GASTRIC BYPASS; GLUCAGON-LIKE PEPTIDE 1; GLUCOSE TOLERANCE TEST; HUMANS; INCRETINS; INSULIN; INSULIN RESISTANCE; LIVER; MALE; MIDDLE AGED; PANCREAS; RANDOMIZED CONTROLLED TRIALS AS TOPIC; TRIGLYCERIDES; WEIGHT LOSS; GLUCAGON LIKE PEPTIDE 1; INCRETIN; TRIACYLGLYCEROL; GLUCOSE BLOOD LEVEL; AGED; ARTICLE; CONTROLLED STUDY; FAT MAS…	ADULT; BLOOD GLUCOSE; BODY WEIGHT; DIABETES MELLITUS; TYPE 2; FEMALE; GASTRIC BYPASS; GLUCAGON-LIKE PEPTIDE 1; GLUCOSE TOLERANCE TEST; HUMANS; INCRETINS; INSULIN; INSULIN RESISTANCE; LIVER; MALE; MIDDLE AGED; PANCREAS; RANDOMIZED CONTROLLED TRIALS AS TOPIC; TRIGLYCERIDES; WEIGHT LOSS; GLUCAGON LIKE PEPTIDE 1; INCRETIN; TRIACYLGLYCEROL; GLUCAGON LIKE PEPTIDE 1; GLUCOSE BLOOD LEVEL; INCRETIN; INSUL…	MAGNETIC RESONANCE CENTRE, INSTITUTE OF CELLULAR MEDICINE, NEWCASTLE UNIVERSITY, NEWCASTLE UPON TYNE, UNITED KINGDOM; INSTITUTE OF CELLULAR MEDICINE, NEWCASTLE UNIVERSITY, NEWCASTLE UPON TYNE, UNITED KINGDOM; DEPARTMENT OF SURGERY, SUNDERLAND ROYAL HOSPITAL, SUNDERLAND, UNITED KINGDOM; DEPARTMENT OF SURGERY, NORTH TYNESIDE GENERAL HOSPITAL, NORTH SHIELDS, UNITED KINGDOM; CENTRE FOR OBESITY RESEAR…	OBJECTIVE THIS STUDY DETERMINED WHETHER THE DECREASE IN PANCREATIC TRIACYLGLYCEROL DURING WEIGHT LOSS IN TYPE 2 DIABETES MELLITUS (T2DM) IS SIMPLY REFLECTIVE OF WHOLE-BODY FAT OR SPECIFIC TO DIABETES AND ASSOCIATED WITH THE SIMULTANEOUS RECOVERY OF INSULIN SECRETORY FUNCTION. RESEARCH DESIGN AND METHODS INDIVIDUALS LISTED FOR GASTRIC BYPASS SURGERY WHO HAD T2DM OR NORMAL GLUCOSE TOLERANCE (NGT) M…			01495992	DIABETES CARE	DIABETES CARE	ENGLISH		158 – 165	AMERICAN DIABETES ASSOCIATION INC.		136	STEVEN S;HOLLINGSWORTH K;SMALL P;WOODCOCK S;PUCCI A;ARIBISALA B;AL-MRABEH A;DALY A;BATTERHAM R;TAYLOR R	10.1158/1940-6207.CAPR-21-0229	WEIGHT LOSS DECREASES EXCESS PANCREATIC TRIACYLGLYCEROL SPECIFICALLY IN TYPE 2 DIABETES	1	2016	STEVEN SARAH;HOLLINGSWORTH KIEREN G;SMALL PETER K;WOODCOCK SEAN A;PUCCI ANDREA;ARIBISALA BENJAMIN;AL-MRABEH AHMAD;DALY ANN K;BATTERHAM RACHEL L;TAYLOR ROY	R. TAYLOR; MAGNETIC RESONANCE CENTRE, INSTITUTE OF CELLULAR MEDICINE, NEWCASTLE UNIVERSITY, NEWCASTLE UPON TYNE, UNITED KINGDOM; EMAIL: ROY.TAYLOR@NCL.AC.UK		NEWCASTLE UNIVERSITY;NEWCASTLE UNIVERSITY;SUNDERLAND ROYAL HOSPITAL;NORTH TYNESIDE GENERAL HOSPITAL;UNIVERSITY COLLEGE LONDON;LAGOS STATE UNIVERSITY	STEVEN S, 2016, DIABETES CARE	https://www.scopus.com/inward/record.uri?eid=2-s2.0-84962129196&doi=10.2337%2fdc15-0750&partnerID=40&md5=75d69c92c30638321da42614c82d4e9d	SCOPUS
ADULT; AGED; BARIATRIC SURGERY; DIABETES MELLITUS; TYPE 2; DIABETIC ANGIOPATHIES; DIABETIC NEPHROPATHIES; DIABETIC NEUROPATHIES; DIABETIC RETINOPATHY; FEMALE; FOLLOW-UP STUDIES; HUMANS; INCIDENCE; MALE; MICROCIRCULATION; MIDDLE AGED; OBESITY; MORBID; PROPORTIONAL HAZARDS MODELS; RETROSPECTIVE STUDIES; RISK FACTORS; YOUNG ADULT; HEMOGLOBIN A1C; INSULIN; ARTICLE; BODY MASS; CARDIOVASCULAR DISEASE; …	ADULT; AGED; BARIATRIC SURGERY; DIABETES MELLITUS; TYPE 2; DIABETIC ANGIOPATHIES; DIABETIC NEPHROPATHIES; DIABETIC NEUROPATHIES; DIABETIC RETINOPATHY; FEMALE; FOLLOW-UP STUDIES; HUMANS; INCIDENCE; MALE; MICROCIRCULATION; MIDDLE AGED; OBESITY; MORBID; PROPORTIONAL HAZARDS MODELS; RETROSPECTIVE STUDIES; RISK FACTORS; YOUNG ADULT; HEMOGLOBIN A1C; INSULIN; ADULT; AGED; ARTICLE; BARIATRIC SURGERY; BOD…	KAISER PERMANENTE MEDICAL CENTER, 39400 PASEO PADRE PARKWAY, FREMONT, 94538, CA, UNITED STATES; KAISER PERMANENTE WASHINGTON HEALTH RESEARCH INSTITUTE, 1730 MINOR AVENUE, SUITE 1600, SEATTLE, 98101, WA, UNITED STATES; HARVARD SCHOOL OF PUBLIC HEALTH, DEPARTMENT OF BIOSTATISTICS, 655 HUNTINGTON AVENUE, BUILDING II, BOSTON, 02115, MA, UNITED STATES; KAISER PERMANENTE SOUTHERN CALIFORNIA, 100 SOUTH …	BACKGROUND: BARIATRIC SURGERY IMPROVES GLYCEMIC CONTROL IN PATIENTS WITH TYPE 2 DIABETES MELLITUS (T2DM), BUT LESS IS KNOWN ABOUT MICROVASCULAR OUTCOMES. OBJECTIVE: TO INVESTIGATE THE RELATIONSHIP BETWEEN BARIATRIC SURGERY AND INCIDENT MICROVASCULAR COMPLICATIONS OF T2DM. DESIGN: RETROSPECTIVE MATCHED COHORT STUDY FROM 2005 TO 2011 WITH FOLLOW-UP THROUGH SEPTEMBER 2015. SETTING: 4 INTEGRATED HEAL…			00034819	ANN. INTERN. MED.	ANNALS OF INTERNAL MEDICINE	ENGLISH		300 – 310	AMERICAN COLLEGE OF PHYSICIANS		136	O’BRIEN R;JOHNSON E;HANEUSE S;COLEMAN K;O’CONNOR P;FISHER D;SIDNEY S;BOGART A;THEIS M;ANAU J;SCHROEDER E;ARTERBURN D	10.7326/M17-2383	MICROVASCULAR OUTCOMES IN PATIENTS WITH DIABETES AFTER BARIATRIC SURGERY VERSUS USUAL CARE	1	2018	O’BRIEN REBECCA;JOHNSON ERIC;HANEUSE SEBASTIEN;COLEMAN KAREN J;O’CONNOR PATRICK J;FISHER DAVID P;SIDNEY STEPHEN;BOGART ANDY;THEIS MARY KAY;ANAU JANE;SCHROEDER EMILY B;ARTERBURN DAVID	D. ARTERBURN; KAISER PERMANENTE WASHINGTON HEALTH RESEARCH INSTITUTE, SEATTLE, 1730 MINOR AVENUE, SUITE 1600, 98101, UNITED STATES; EMAIL: ARTERBURN.D@GHC.ORG		KAISER PERMANENTE MEDICAL CENTER;KAISER PERMANENTE WASHINGTON HEALTH RESEARCH INSTITUTE;HARVARD SCHOOL OF PUBLIC HEALTH;HEALTHPARTNERS RESEARCH FOUNDATION;KAISER PERMANENTE DIVISION OF RESEARCH	O’BRIEN R, 2018, ANN INTERN MED	https://www.scopus.com/inward/record.uri?eid=2-s2.0-85052874194&doi=10.7326%2fM17-2383&partnerID=40&md5=7ad7d00739fa786252c3c943f177e2fb	SCOPUS
ERECTILE DYSFUNCTION; GASTRIC BYPASS; IMPOTENCE; LIFESTYLE; MODIFICATIONS; MORBIDLY OBESE; PROSPECTIVELY RANDOMIZED CONTROLLED; TRIAL; SEXUAL FUNCTION; SEXUAL HORMONES; QUALITY-OF-LIFE; WEIGHT-LOSS; METABOLIC SYNDROME; BARIATRIC SURGERY; FREE TESTOSTERONE; BINDING GLOBULIN; ADIPOSE-TISSUE; STYLE CHANGES; MEN	QUALITY-OF-LIFE; WEIGHT-LOSS; SEXUAL FUNCTION; METABOLIC SYNDROME; BARIATRIC SURGERY; FREE TESTOSTERONE; BINDING GLOBULIN; ADIPOSE-TISSUE; STYLE CHANGES; MEN	REIS, LO (CORRESPONDING AUTHOR), VOTORANTIM 51,AP 43, BR-13073090 SAO PAULO, BRAZIL.; REIS, L. O.; FREGONESI, A.; FERREIRA, U., UNIV ESTADUAL CAMPINAS, DEPT UROL, SAO PAULO, BRAZIL.; FAVARO, W. J., UNIV ESTADUAL CAMPINAS, DEPT ANAT, SAO PAULO, BRAZIL.; BARREIRO, G. C.; CHAIM, E. A., UNIV ESTADUAL CAMPINAS, DEPT SURG, SAO PAULO, BRAZIL.; DE OLIVEIRA, L. C., UNIV ESTADUAL CAMPINAS, PHYSIOL LAB, SAO…	THE EFFECTS OF WEIGHT LOSS ON ERECTILE FUNCTION AND HORMONES HAVE NOT BEEN WELL STUDIED. THE AIM OF THIS STUDY WAS TO MEASURE THE DEGREE TO WHICH SEXUAL FUNCTION AND IN PARTICULAR ERECTILE FUNCTION AND HORMONAL ENVIRONMENT CHANGE AFTER SUBSTANTIAL WEIGHT LOSS, SURGICALLY AND NON-SURGICALLY INDUCED IN THE MORBIDLY OBESE MALE IN A PROSPECTIVE RANDOMIZED LONG-TERM CONTROLLED TRIAL. FURTHERMORE, HOW …	111 RIVER ST, HOBOKEN 07030-5774, NJ USA	UNIVERSIDADE ESTADUAL DE CAMPINAS; UNIVERSIDADE ESTADUAL DE CAMPINAS; UNIVERSIDADE ESTADUAL DE CAMPINAS; UNIVERSIDADE ESTADUAL DE CAMPINAS	0105-6263	INT. J. ANDROL.	INTERNATIONAL JOURNAL OF ANDROLOGY	ENGLISH	CHAIM, ELINTON/0000-0001-9370-9518 FREGONESI, ADRIANO/0000-0002-6853-1014 REIS, LEONARDO/0000-0003-2092-414X FAVARO, WAGNER JOSE/0000-0001-5830-8938	736-744	WILEY	ENDOCRINOLOGY \& METABOLISM	130	REIS L;FAVARO W;BARREIRO G;DE O L;CHAIM E;FREGONESI A;FERREIRA U	10.1111/j.1365-2605.2009.01017.x	ERECTILE DYSFUNCTION AND HORMONAL IMBALANCE IN MORBIDLY OBESE MALE IS REVERSED AFTER GASTRIC BYPASS SURGERY: A PROSPECTIVE RANDOMIZED CONTROLLED TRIAL	1	2010	REIS L O;FAVARO W J;BARREIRO G C;DE OLIVEIRA L C;CHAIM E A;FREGONESI A;FERREIRA U	REIS, LO (CORRESPONDING AUTHOR), VOTORANTIM 51,AP 43, BR-13073090 SAO PAULO, BRAZIL	erectile dysfunction; gastric bypass; impotence; lifestyle; modifications; morbidly obese; prospectively randomized controlled; trial; sexual function; sexual hormones	LO (CORRESPONDING AUTHOR);UNIV ESTADUAL CAMPINAS;UNIV ESTADUAL CAMPINAS;UNIV ESTADUAL CAMPINAS;UNIV ESTADUAL CAMPINAS	REIS L, 2010, INT J ANDROL		ISI
BARIATRIC SURGERY; GASTRIC BYPASS; MEASURED LIMBS; RYGBP; WEIGHT LOSS; ADOLESCENT; ADULT; AGED; BODY MASS INDEX; COMORBIDITY; DIETARY SUPPLEMENTS; FEMALE; HUMANS; MALE; MIDDLE AGED; OBESITY; MORBID; POSTOPERATIVE CARE; PROSPECTIVE STUDIES; TREATMENT OUTCOME; YOUNG ADULT; ADVERSE EFFECTS; BODY MASS; CONTROLLED STUDY; DIET SUPPLEMENTATION; HUMAN; PATHOPHYSIOLOGY; PROCEDURES; PROSPECTIVE STUDY; RAND…	ADOLESCENT; ADULT; AGED; BODY MASS INDEX; COMORBIDITY; DIETARY SUPPLEMENTS; FEMALE; GASTRIC BYPASS; HUMANS; MALE; MIDDLE AGED; OBESITY; MORBID; POSTOPERATIVE CARE; PROSPECTIVE STUDIES; TREATMENT OUTCOME; WEIGHT LOSS; YOUNG ADULT; ADOLESCENT; ADULT; ADVERSE EFFECTS; AGED; BODY MASS; COMORBIDITY; CONTROLLED STUDY; DIET SUPPLEMENTATION; FEMALE; HUMAN; MALE; MIDDLE AGED; OBESITY; MORBID; PATHOPHYSIOL…	DEPARTMENT OF SURGERY, LANDSPITALI UNIVERSITY HOSPITAL, REYKJAVIK, ICELAND; DEPARTMENT OF SURGERY, ALERIS HOSPITAL, FREDRIK STANGS GATE 11-13, OSLO, 0264, NORWAY; ALERIS OBESITY SKANE, KRISTIANSTAD, SWEDEN	BACKGROUND: SEVERAL STUDIES INDICATE THAT INCREASING THE ALIMENTARY LIMB LENGTH IN GASTRIC BYPASS SURGERY PRODUCES ONLY A MINOR IMPROVEMENT OF EXCESS BMI LOSS. FEW STUDIES HAVE ADDRESSED THE EFFICACY OF INCREASING THE LENGTH OF THE PANCREATICO-BILIARY LIMB. METHODS: HERE, WE PRESENT A PROSPECTIVE RANDOMIZED STUDY OF 187 CONSECUTIVE LAPAROSCOPIC ROUX-Y GASTRIC BYPASS OPERATIONS OPERATED OVER 2 YEA…			09608923	OBES. SURG.	OBESITY SURGERY	ENGLISH		1595 – 1602	SPRINGER SCIENCE AND BUSINESS MEDIA, LLC		130	NERGAARD B;LEIFSSON B;HEDENBRO J;GISLASON H	10.1007/s11695-014-1245-7	GASTRIC BYPASS WITH LONG ALIMENTARY LIMB OR LONG PANCREATOBILIARY LIMB—LONGTERM RESULTS ON WEIGHT LOSS RESOLUTION OF COMORBIDITIES AND METABOLIC PARAMETERS	1	2014	NERGAARD BENT JOHNNY;LEIFSSON BJÖRN GEIR;HEDENBRO JAN;GISLASON HJÖRTUR		Bariatric surgery; Gastric bypass; Measured limbs; RYGBP; Weight loss	LANDSPITALI UNIVERSITY HOSPITAL;ALERIS HOSPITAL	NERGAARD B, 2014, OBES SURG	https://www.scopus.com/inward/record.uri?eid=2-s2.0-84937563777&doi=10.1007%2fs11695-014-1245-7&partnerID=40&md5=7cff8004fa4db3642a3ba82aae0cdec0	SCOPUS
QUALITY-OF-LIFE; GASTRIC BYPASS-SURGERY; WEIGHT-LOSS; PHYSICAL-ACTIVITY; LONG-TERM; MENTAL-HEALTH; PARTICIPATION; MAINTENANCE; OVERWEIGHT; INTENSITY	QUALITY-OF-LIFE; GASTRIC BYPASS-SURGERY; WEIGHT-LOSS; PHYSICAL-ACTIVITY; LONG-TERM; MENTAL-HEALTH; PARTICIPATION; MAINTENANCE; OVERWEIGHT; INTENSITY	SHAH, M (CORRESPONDING AUTHOR), UNIV TEXAS SW MED CTR DALLAS, DIV NUTR \& METAB DIS, DALLAS, TX 75390 USA.; SHAH, MEENA; RAO, SNEHA; QUITTNER, CLAUDIA; GARG, ABHIMANYU, UNIV TEXAS SW MED CTR DALLAS, DIV NUTR \& METAB DIS, DALLAS, TX 75390 USA.; SHAH, MEENA; RAO, SNEHA; QUITTNER, CLAUDIA; GARG, ABHIMANYU, UNIV TEXAS SW MED CTR DALLAS, CTR HUMAN NUTR, DALLAS, TX 75390 USA.; SHAH, MEENA, TEXAS CHRIS…	WEIGHT REGAIN IS A PROBLEM AMONG MANY BARIATRIC SURGERY PATIENTS. WHETHER A HIGH-VOLUME EXERCISE PROGRAM (HVEP), A STRATEGY TO LIMIT WEIGHT REGAIN, IS FEASIBLE IN THESE PATIENTS IS UNKNOWN. THE FEASIBILITY OF AN HVEP IN OBESE POST-BARIATRIC-SURGERY PATIENTS WAS DETERMINED BY RANDOMIZING 33 ROUX-EN-Y GASTRIC BYPASS (RYGB) AND GASTRIC BANDING (GB) SURGERY PATIENTS WITH A MEAN BMI OF 41 +/- 6 KG/M(2…	111 RIVER ST, HOBOKEN 07030-5774, NJ USA	UNIVERSITY OF TEXAS SYSTEM; UNIVERSITY OF TEXAS SOUTHWESTERN MEDICAL CENTER; UNIVERSITY OF TEXAS SYSTEM; UNIVERSITY OF TEXAS SOUTHWESTERN MEDICAL CENTER; TEXAS CHRISTIAN UNIVERSITY; UNIVERSITY OF TEXAS SYSTEM; UNIVERSITY OF TEXAS SOUTHWESTERN MEDICAL CENTER; UNIVERSITY OF TEXAS SYSTEM; UNIVERSITY OF TEXAS SOUTHWESTERN MEDICAL CENTER; UNIVERSITY OF TEXAS SYSTEM; UNIVERSITY OF TEXAS SOUTHWESTERN ME…	1930-7381	OBESITY	OBESITY	ENGLISH		1826-1834	WILEY	ENDOCRINOLOGY \& METABOLISM; NUTRITION \& DIETETICS	128	SHAH M;SNELL P;RAO S;ADAMS-HUET B;QUITTNER C;LIVINGSTON E;GARG A	10.1038/oby.2011.172	HIGHVOLUME EXERCISE PROGRAM IN OBESE BARIATRIC SURGERY PATIENTS: A RANDOMIZED CONTROLLED TRIAL	2	2011	SHAH MEENA;SNELL PETER G;RAO SNEHA;ADAMS-HUET BEVERLEY;QUITTNER CLAUDIA;LIVINGSTON EDWARD H;GARG ABHIMANYU	SHAH, M (CORRESPONDING AUTHOR), UNIV TEXAS SW MED CTR DALLAS, DIV NUTR \& METAB DIS, DALLAS, TX 75390 USA		UNIV TEXAS SW MED CTR DALLAS;UNIV TEXAS SW MED CTR DALLAS;UNIV TEXAS SW MED CTR DALLAS;TEXAS CHRISTIAN UNIV;UNIV TEXAS SW MED CTR DALLAS;UNIV TEXAS SW MED CTR DALLAS;UNIV TEXAS SW MED CTR DALLAS	SHAH M, 2011, OBESITY		ISI
BARIATRIC SURGERY; GASTRIC BYPASS; MORBID OBESITY; RANDOMIZED STUDY; SLEEVE GASTRECTOMY; ADULT; AGE DISTRIBUTION; AGED; ARTICLE; BODY MASS; COMORBIDITY; CONTROLLED STUDY; FEMALE; FOLLOW UP; HUMAN; INTERMETHOD COMPARISON; LAPAROSCOPIC SURGERY; MAJOR CLINICAL STUDY; MALE; MORBIDITY; MULTICENTER STUDY; OPERATION DURATION; OUTCOME ASSESSMENT; POSTOPERATIVE COMPLICATION; PRIORITY JOURNAL; PROSPECTIVE …	ADULT; AGE DISTRIBUTION; AGED; ARTICLE; BODY MASS; COMORBIDITY; CONTROLLED STUDY; FEMALE; FOLLOW UP; HUMAN; INTERMETHOD COMPARISON; LAPAROSCOPIC SURGERY; MAJOR CLINICAL STUDY; MALE; MORBID OBESITY; MORBIDITY; MULTICENTER STUDY; OPERATION DURATION; OUTCOME ASSESSMENT; POSTOPERATIVE COMPLICATION; PRIORITY JOURNAL; PROSPECTIVE STUDY; QUALITY OF LIFE; RANDOMIZED CONTROLLED TRIAL; REOPERATION; ROUX Y …	DEPARTMENT OF SURGERY, TURKU UNIVERSITY HOSPITAL, 20521 TURKU, PL 52, FINLAND; DEPARTMENT OF EMERGENCY, TURKU UNIVERSITY HOSPITAL, TURKU, FINLAND; DEPARTMENT OF SURGERY, HELSINKI UNIVERSITY CENTRAL HOSPITAL, HELSINKI, FINLAND; DEPARTMENT OF SURGERY, VAASA CENTRAL HOSPITAL, VAASA, FINLAND; DEPARTMENT OF SURGERY, HATANPÄÄ HOSPITAL, TAMPERE, FINLAND; DEPARTMENT OF BIOSTATISTICS, UNIVERSITY OF TURKU,…	BACKGROUND: THE LONG-TERM EFFICACY OF LAPAROSCOPIC ROUX-EN-Y GASTRIC BYPASS (RYGB) IN THE TREATMENT OF MORBID OBESITY HAS BEEN DEMONSTRATED. LAPAROSCOPIC SLEEVE GASTRECTOMY (SG) AS A SINGLE PROCEDURE HAS SHOWN PROMISING SHORT-TERM RESULTS, BUT THE LONG-TERM EFFICACY OF SG HAS NOT YET BEEN DEMONSTRATED. THE AIM OF THIS STUDY WAS TO DETERMINE THE PRELIMINARY 30-DAY MORBIDITY AND MORTALITY OF RYGB A…			9302794	SURG. ENDOSC. INTERV. TECH.	SURGICAL ENDOSCOPY AND OTHER INTERVENTIONAL TECHNIQUES	ENGLISH		2521 – 2526	SPRINGER NEW YORK LLC		125	HELMIÖ M;VICTORZON M;OVASKA J;LEIVONEN M;JUUTI A;JASER N;PEROMAA P;TOLONEN P;HURME S;SALMINEN P	10.1007/s00464-012-2225-4	SLEEVEPASS: A RANDOMIZED PROSPECTIVE MULTICENTER STUDY COMPARING LAPAROSCOPIC SLEEVE GASTRECTOMY AND GASTRIC BYPASS IN THE TREATMENT OF MORBID OBESITY: PRELIMINARY RESULTS	2	2012	HELMIÖ MIKA;VICTORZON MIKAEL;OVASKA JARI;LEIVONEN MARJA;JUUTI ANNE;JASER NABIL;PEROMAA PIPSA;TOLONEN PEKKA;HURME SAIJA;SALMINEN PAULINA	M. HELMIÖ; DEPARTMENT OF SURGERY, TURKU UNIVERSITY HOSPITAL, 20521 TURKU, PL 52, FINLAND; EMAIL: MIKA.HELMIO@TYKS.FI	Bariatric surgery; Gastric bypass; Morbid obesity; Randomized study; Sleeve gastrectomy	TURKU UNIVERSITY HOSPITAL;TURKU UNIVERSITY HOSPITAL;HELSINKI UNIVERSITY CENTRAL HOSPITAL;VAASA CENTRAL HOSPITAL;HATANPÄÄ HOSPITAL;UNIVERSITY OF TURKU	HELMIÖ M, 2012, SURG ENDOSC INTERV TECH	https://www.scopus.com/inward/record.uri?eid=2-s2.0-84866140665&doi=10.1007%2fs00464-012-2225-4&partnerID=40&md5=96c86bd2e336962674f96057054892a1	SCOPUS
AGING; WEIGHT CONTROL; CLINICAL TRIALS; GASTROPLASTY; GASTRIC BYPASS; CARDIOVASCULAR MORTALITY; MORBIDLY OBESE; HYPERTENSION; SURGERY; REDUCTION; ARTERY; DEATH	CARDIOVASCULAR MORTALITY; MORBIDLY OBESE; HYPERTENSION; SURGERY; REDUCTION; ARTERY; DEATH	SJÖSTRÖM, CD (CORRESPONDING AUTHOR), SAHLGRENS UNIV HOSP, DEPT ANESTHESIA \& INTENSIVE CARE, SOS SECRETARIAT, VITA STRAKEY 15, S-41345 GOTHENBURG, SWEDEN.; SAHLGRENS UNIV HOSP, DEPT ANESTHESIA \& INTENSIVE CARE, SOS SECRETARIAT, S-41345 GOTHENBURG, SWEDEN.; SAHLGRENS UNIV HOSP, DEPT MED, S-41345 GOTHENBURG, SWEDEN.; SAHLGRENS UNIV HOSP, DEPT ANESTHESIOL \& INTENS CARE, S-41345 GOTHENBURG, SWEDEN.	OBJECTIVE: RECENTLY WE REPORTED A COMPLETE RELAPSE IN THE BLOOD PRESSURE (BP) OF OBESE SUBJECTS DESPITE A MAINTAINED 16\% WEIGHT LOSS OVER 8 YEARS. THIS RELAPSE IS NOW ANALYZED AS A FUNCTION OF SEVERAL VARIABLES. PULSE PRESSURE (PP) IS AN INDEPENDENT RISK FACTOR OF CARDIOVASCULAR MORTALITY. WE NOW EXAMINE THE DEVELOPMENT OF PP IN THE OBESE AND WHETHER IT CAN BE MODIFIED BY WEIGHT-REDUCING GASTRIC…	C/O DR MICHAEL JENSEN, MAYO MEDICAL CENTER, MAYO CLIN 200 FIRST ST, SW, ROCHESTER, MN 55905 USA	SAHLGRENSKA UNIVERSITY HOSPITAL; SAHLGRENSKA UNIVERSITY HOSPITAL; SAHLGRENSKA UNIVERSITY HOSPITAL	1071-7323	OBES. RES.	OBESITY RESEARCH	ENGLISH	PELTONEN, MARKKU/0000-0002-3767-4223 SJOSTROM, DAVID/0000-0002-8380-9766	188-195	NORTH AMER ASSOC STUDY OBESITY	ENDOCRINOLOGY \& METABOLISM; NUTRITION \& DIETETICS	124	SJÖSTRÖM C;PELTONEN M;SJÖSTRÖM L	10.1038/oby.2001.20	BLOOD PRESSURE AND PULSE PRESSURE DURING LONGTERM WEIGHT LOSS IN THE OBESE:: THE SWEDISH OBESE SUBJECTS (SOS) INTERVENTION STUDY	3	2001	SJÖSTRÖM CD;PELTONEN M;SJÖSTRÖM L	SJÖSTRÖM, CD (CORRESPONDING AUTHOR), SAHLGRENS UNIV HOSP, DEPT ANESTHESIA \& INTENSIVE CARE, SOS SECRETARIAT, VITA STRAKEY 15, S-41345 GOTHENBURG, SWEDEN	aging; weight control; clinical trials; gastroplasty; gastric bypass	SAHLGRENS UNIV HOSP;SAHLGRENS UNIV HOSP;SAHLGRENS UNIV HOSP;SAHLGRENS UNIV HOSP	SJÖSTRÖM C, 2001, OBES RES		ISI
CARDIOVASCULAR RISK; CO-MORBIDITIES; LAPAROSCOPIC ROUX-EN-Y GASTRIC BYPASS; LAPAROSCOPIC SLEEVE GASTRECTOMY; ADULT; CARDIOVASCULAR DISEASES; COMORBIDITY; FEMALE; FOLLOW-UP STUDIES; GASTRECTOMY; GASTRIC BYPASS; HUMANS; HYPERCHOLESTEROLEMIA; HYPERTENSION; LAPAROSCOPY; MALE; MIDDLE AGED; OBESITY; MORBID; SPAIN; TREATMENT OUTCOME; WEIGHT LOSS; CHOLESTEROL; HIGH DENSITY LIPOPROTEIN CHOLESTEROL; LOW DE…	ADULT; CARDIOVASCULAR DISEASES; COMORBIDITY; FEMALE; FOLLOW-UP STUDIES; GASTRECTOMY; GASTRIC BYPASS; HUMANS; HYPERCHOLESTEROLEMIA; HYPERTENSION; LAPAROSCOPY; MALE; MIDDLE AGED; OBESITY; MORBID; SPAIN; TREATMENT OUTCOME; WEIGHT LOSS; CHOLESTEROL; HIGH DENSITY LIPOPROTEIN CHOLESTEROL; LOW DENSITY LIPOPROTEIN CHOLESTEROL; TRIACYLGLYCEROL; ADULT; ARTICLE; CARDIOVASCULAR RISK; CHOLESTEROL METABOLISM; …	DEPARTMENT OF ENDOCRINOLOGY AND NUTRITION, HOSPITAL UNIVERSITARI DEL MAR, BARCELONA, BARCELONA E-08003, PASEO MARÍTIMO, 25-29, SPAIN; DEPARTMENT OF MEDICINE, UNIVERSITAT AUTÒNOMA DE BARCELONA, BARCELONA, SPAIN; DEPARTMENT OF SURGERY, HOSPITAL UNIVERSITARI DEL MAR, BARCELONA, SPAIN	BACKGROUND: VERY FEW STUDIES HAVE COMPARED LAPAROSCOPIC ROUX-EN-Y GASTRIC BYPASS (LRYGB) AND LAPAROSCOPIC SLEEVE GASTRECTOMY (LSG) OUTCOMES OR ANALYZED IMPROVEMENT IN CARDIOVASCULAR RISK (CVR) AFTER BARIATRIC SURGERY. NONE OF THE STUDIES CONSIDERED THE MEDITERRANEAN POPULATION. OUR PRIMARY OBJECTIVE WAS TO COMPARE THE 10-YEAR ESTIMATED CVR REDUCTION ACHIEVED BY LRYGB AND LSG IN SPANISH SUBJECTS W…			18787533	SURG. OBES. RELAT. DIS.	SURGERY FOR OBESITY AND RELATED DISEASES	ENGLISH		575 – 580			124	BENAIGES D;GODAY A;RAMON J;HERNANDEZ E;PERA M;CANO J	10.1016/j.soard.2011.03.002	LAPAROSCOPIC SLEEVE GASTRECTOMY AND LAPAROSCOPIC GASTRIC BYPASS ARE EQUALLY EFFECTIVE FOR REDUCTION OF CARDIOVASCULAR RISK IN SEVERELY OBESE PATIENTS AT ONE YEAR OF FOLLOWUP	2	2011	BENAIGES DAVID;GODAY ALBERT;RAMON JOSE M;HERNANDEZ ELISA;PERA MANUEL;CANO JUAN F	D. BENAIGES; DEPARTMENT OF ENDOCRINOLOGY AND NUTRITION, HOSPITAL UNIVERSITARI DEL MAR, BARCELONA, BARCELONA E-08003, PASEO MARÍTIMO, 25-29, SPAIN; EMAIL: 96002@HOSPITALDELMAR.CAT	Cardiovascular risk; Co-morbidities; Laparoscopic Roux-en-Y gastric bypass; Laparoscopic sleeve gastrectomy	HOSPITAL UNIVERSITARI DEL MAR;UNIVERSITAT AUTÒNOMA DE BARCELONA;HOSPITAL UNIVERSITARI DEL MAR	BENAIGES D, 2011, SURG OBES RELAT DIS	https://www.scopus.com/inward/record.uri?eid=2-s2.0-80053321475&doi=10.1016%2fj.soard.2011.03.002&partnerID=40&md5=ac61ba4da56f0fb4192051b795da4a96	SCOPUS
ENDOSCOPY; GASTRIC BYPASS; MARGINAL ULCER; MORBID OBESITY; ADULT; DIGESTIVE SYSTEM; FEMALE; FOLLOW-UP STUDIES; HUMANS; INCIDENCE; MALE; OBESITY; MORBID; PEPTIC ULCER; PROSPECTIVE STUDIES; TIME FACTORS; TREATMENT OUTCOME; ARTICLE; CLINICAL TRIAL; CONTROLLED STUDY; HUMAN; JEJUNUM ULCER; LAPAROSCOPY; MAJOR CLINICAL STUDY; MORBIDITY; PRIORITY JOURNAL; STOMACH BYPASS; SURGICAL TECHNIQUE	ADULT; ENDOSCOPY; DIGESTIVE SYSTEM; FEMALE; FOLLOW-UP STUDIES; GASTRIC BYPASS; HUMANS; INCIDENCE; MALE; OBESITY; MORBID; PEPTIC ULCER; PROSPECTIVE STUDIES; TIME FACTORS; TREATMENT OUTCOME; ADULT; ARTICLE; CLINICAL TRIAL; CONTROLLED STUDY; ENDOSCOPY; FEMALE; HUMAN; JEJUNUM ULCER; LAPAROSCOPY; MAJOR CLINICAL STUDY; MALE; MORBIDITY; OBESITY; PRIORITY JOURNAL; STOMACH BYPASS; SURGICAL TECHNIQUE	DEPARTMENT OF SURGERY, UNIVERSITY HOSPITAL, UNIVERSITY OF CHILE, SANTIAGO, CHILE; DEPARTMENT OF SURGERY, HOSPITAL J.J. AGUIRRE, SANTIAGO, SANTOS DUMONT 999, CHILE	BACKGROUND: MARGINAL ULCER (MU) IS AN OCCASIONAL COMPLICATION AFTER GASTRIC BYPASS. WE STUDIED THE INCIDENCE OF THIS COMPLICATION BY A PROSPECTIVE ROUTINE ENDOSCOPIC EVALUATION. 441 MORBIDLY OBESE PATIENTS WERE STUDIED PROSPECTIVELY. THERE WERE 358 WOMEN AND 97 MEN, WITH MEAN AGE 41 YEARS AND MEAN BMI 43 KG/M2. AN ENDOSCOPIC EVALUATION WAS PERFORMED IN ALL 1 MONTH AFTER SURGERY, WHICH WAS REPEATE…			09608923	OBES. SURG.	OBESITY SURGERY	ENGLISH		135 – 138			123	CSENDES A;BURGOS A;ALTUVE J;BONACIC S	10.1007/s11695-008-9588-6	INCIDENCE OF MARGINAL ULCER 1 MONTH AND 1 TO 2 YEARS AFTER GASTRIC BYPASS: A PROSPECTIVE CONSECUTIVE ENDOSCOPIC EVALUATION OF 442 PATIENTS WITH MORBID OBESITY	1	2009	CSENDES ATTILA;BURGOS ANA MARIA;ALTUVE JUAN;BONACIC SANTIAGO	A. CSENDES; DEPARTMENT OF SURGERY, HOSPITAL J.J. AGUIRRE, SANTIAGO, SANTOS DUMONT 999, CHILE; EMAIL: ACSENDES@REDCLINICAUCHILE.CL	Endoscopy; Gastric bypass; Marginal ulcer; Morbid obesity	UNIVERSITY HOSPITAL;HOSPITAL J.J. AGUIRRE	CSENDES A, 2009, OBES SURG	https://www.scopus.com/inward/record.uri?eid=2-s2.0-58649112795&doi=10.1007%2fs11695-008-9588-6&partnerID=40&md5=01e2a782aa7be3db23fed8da1ed0fe35	SCOPUS
BARIATRIC SURGERY; GASTRIC BYPASS; BODY COMPOSITION; WEIGHT LOSS; WHEY; PROTEIN; FOLLOW-UP; OVERWEIGHT; INSULIN; GLUCOSE; PLASMA; REGAIN; MASS	GASTRIC BYPASS; FOLLOW-UP; OVERWEIGHT; INSULIN; GLUCOSE; PLASMA; REGAIN; MASS	GOMES, D (CORRESPONDING AUTHOR), UNIV BRASILIA, DEPT NUTR, BRASILIA, DF, BRAZIL.; LOPES GOMES, DANIELA; LOPES DA SILVA, FERNANDA BASSAN; DUTRA, ELIANE SAID; BAIOCCHI DE CARVALHO, KENIA MARA, UNIV BRASILIA, DEPT NUTR, BRASILIA, DF, BRAZIL.; MOEHLECKE, MILENE; SCHAAN, BEATRIZ D'AGORD, UNIV RIO GRANDE SUL, PORTO ALEGRE CLIN HOSP, DIV ENDOCRINE, PORTO ALEGRE, RS, BRAZIL.	THE IDEAL NUTRITIONAL APPROACH FOR WEIGHT REGAIN AFTER BARIATRIC SURGERY REMAINS UNCLEAR. THE OBJECTIVE OF THIS STUDY IS TO ASSESS THE EFFECT OF WHEY PROTEIN SUPPLEMENTATION ON WEIGHT LOSS AND BODY COMPOSITION OF WOMEN WHO REGAINED WEIGHT 24 OR MORE MONTHS AFTER BARIATRIC SURGERY. THIS IS A 16-WEEK OPEN-LABEL, PARALLEL-GROUP, RANDOMIZED CONTROLLED TRIAL OF WOMEN WHO REGAINED AT LEAST 5 \% OF THEI…	ONE NEW YORK PLAZA, SUITE 4600, NEW YORK, NY, UNITED STATES	UNIVERSIDADE DE BRASILIA; UNIVERSIDADE FEDERAL DO RIO GRANDE DO SUL	0960-8923	OBES. SURG.	OBESITY SURGERY	ENGLISH	DE CARVALHO, KENIA MARA BAIOCCHI/0000-0003-2799-1038	424-431	SPRINGER	SURGERY	123	LOPES G D;MOEHLECKE M;LOPES D S F;BASSAN B;DUTRA E;SCHAAN B;BAIOCCHI B;DE C K	10.1016/j.cgh.2016.10.023	WHEY PROTEIN SUPPLEMENTATION ENHANCES BODY FAT AND WEIGHT LOSS IN WOMEN LONG AFTER BARIATRIC SURGERY: A RANDOMIZED CONTROLLED TRIAL	1	2017	LOPES GOMES DANIELA;MOEHLECKE MILENE;LOPES DA SILVA FERNANDA; BASSAN;DUTRA ELIANE SAID;SCHAAN BEATRIZ D'AGORD;BAIOCCHI; DE CARVALHO KENIA MARA	GOMES, D (CORRESPONDING AUTHOR), UNIV BRASILIA, DEPT NUTR, BRASILIA, DF, BRAZIL	Bariatric surgery; Gastric bypass; Body composition; Weight loss; Whey; protein	UNIV BRASILIA;UNIV BRASILIA;UNIV RIO GRANDE SUL	LOPES G D, 2017, OBES SURG		ISI
Y GASTRIC BYPASS; DUTCH EATING BEHAVIOR; BARIATRIC SURGERY; WEIGHT-LOSS; SLEEVE GASTRECTOMY; GUT HORMONES; FOOD-INTAKE; REMISSION; QUESTIONNAIRE; EXPENDITURE	Y GASTRIC BYPASS; DUTCH EATING BEHAVIOR; BARIATRIC SURGERY; WEIGHT-LOSS; SLEEVE GASTRECTOMY; GUT HORMONES; FOOD-INTAKE; REMISSION; QUESTIONNAIRE; EXPENDITURE	TAN, TM (CORRESPONDING AUTHOR), IMPERIAL COLL LONDON, DIV DIABET ENDOCRINOL \& METAB, LONDON W12 0NN, ENGLAND.; MIRAS, ALEXANDER DIMITRI; PEREZ-PEVIDA, BELEN; ALDHWAYAN, MADHAWI; KAMOCKA, ANNA; MCGLONE, EMMA ROSE; AL-NAJIM, WERD; CHAHAL, HARVINDER; SCHOLTZ, SAMANTHA; BLOOM, STEPHEN R.; TAN, TRICIA M., IMPERIAL COLL LONDON, DIV DIABET ENDOCRINOL \& METAB, DEPT MED, LONDON, ENGLAND.; AHMED, AHMED R…	BACKGROUND MANY PATIENTS WITH TYPE 2 DIABETES DO NOT ACHIEVE SUSTAINED DIABETES REMISSION AFTER METABOLIC (BARIATRIC) SURGERY FOR THE TREATMENT OF OBESITY. LIRAGLUTIDE, A GLUCAGON-LIKE PEPTIDE-1 ANALOGUE, IMPROVES GLYCAEMIC CONTROL AND REDUCES BODYWEIGHT IN PATIENTS WITH TYPE 2 DIABETES. OUR AIM WAS TO ASSESS THE SAFETY AND EFFICACY OF LIRAGLUTIDE 1.8 MG IN PATIENTS WITH PERSISTENT OR RECURRENT T…	STE 800, 230 PARK AVE, NEW YORK, NY 10169 USA	IMPERIAL COLLEGE LONDON; IMPERIAL COLLEGE LONDON; IMPERIAL COLLEGE LONDON; UNIVERSITY COLLEGE DUBLIN; UNIVERSITY OF LONDON; UNIVERSITY COLLEGE LONDON; KING'S COLLEGE LONDON; UNIVERSITY COLLEGE LONDON HOSPITALS NHS FOUNDATION TRUST; UNIVERSITY OF LONDON; UNIVERSITY COLLEGE LONDON; UNIVERSITY OF LONDON; UNIVERSITY COLLEGE LONDON; UNIVERSITY COLLEGE LONDON HOSPITALS NHS FOUNDATION TRUST; GUY'S \& ST…	2213-8587	LANCET DIABETES ENDOCRINOL.	LANCET DIABETES \& ENDOCRINOLOGY	ENGLISH	PEREZ-PEVIDA, BELEN/0000-0001-8632-488X AHMED, AHMED/0000-0002-8349-4688 TAN, TRICIA/0000-0001-5873-3432 MIRAS, ALEX/0000-0003-3830-3173 MCGOWAN, BARBARA/0000-0003-2015-726X MCGLONE, EMMA ROSE/0000-0002-0968-6972 AL-NAJIM, WERD/0000-0002-0020-4391 ALDHWAYAN, MADHAWI/0000-0002-9228-8712 BATTERHAM, RACHEL/0000-0002-5477-8585 KAMOCKA, ANNA/0000-0002-6242-0639	549-559	ELSEVIER SCIENCE INC	ENDOCRINOLOGY \& METABOLISM	122	MIRAS A;PEREZ-PEVIDA B;ALDHWAYAN M;KAMOCKA A;MCGLONE E;AL-NAJIM W;CHAHAL ;HARVINDER H;BATTERHAM R;MCGOWAN B;KHAN O;GREENER V;AHMED A;PETRIE A;SCHOLTZ ;SAMANTHA S;BLOOM S;TAN T	10.1016/S2213-8587(19)30157-3	ADJUNCTIVE LIRAGLUTIDE TREATMENT IN PATIENTS WITH PERSISTENT OR RECURRENT TYPE 2 DIABETES AFTER METABOLIC SURGERY (GRAVITAS): A RANDOMISED DOUBLEBLIND PLACEBOCONTROLLED TRIAL	2	2019	MIRAS ALEXANDER DIMITRI;PEREZ-PEVIDA BELEN;ALDHWAYAN MADHAWI;KAMOCKA ANNA;MCGLONE EMMA ROSE;AL-NAJIM WERD;CHAHAL; HARVINDER;BATTERHAM RACHEL L;MCGOWAN BARBARA;KHAN OMAR;GREENER VERONICA;AHMED AHMED R;PETRIE AVIVA;SCHOLTZ; SAMANTHA;BLOOM STEPHEN R;TAN TRICIA M	TAN, TM (CORRESPONDING AUTHOR), IMPERIAL COLL LONDON, DIV DIABET ENDOCRINOL \& METAB, LONDON W12 0NN, ENGLAND		IMPERIAL COLL LONDON;SCHOLTZ;IMPERIAL COLL LONDON;IMPERIAL COLL LONDON;IMPERIAL COLL HEALTHCARE NHS TRUST;UNIV COLL DUBLIN;RAYNE INST;UNIV COLL LONDON HOSP;UNIV COLL LONDON HOSP;GUYS AND ST THOMAS NHS FDN TRUST;ST GEORGES UNIV HOSP NHS TRUST;CHELSEA AND WESTMINSTER HOSP NHS FDN TRUST;EASTMAN DENT INST	MIRAS A, 2019, LANCET DIABETES ENDOCRINOL		ISI
ADULT; ALCOHOLISM; EATING; FEEDING BEHAVIOR; FEMALE; GASTRIC BYPASS; GASTROPLASTY; HEALTH BEHAVIOR; HUMANS; LONGITUDINAL STUDIES; MALE; MIDDLE AGED; OBESITY; POSTOPERATIVE PERIOD; SMOKING; SURVEYS AND QUESTIONNAIRES; WEIGHT LOSS; ALCOHOL; ILLICIT DRUG; ALCOHOL CONSUMPTION; ARTICLE; BARIATRIC SURGERY; BEHAVIOR CHANGE; BODY IMAGE; COHORT ANALYSIS; GASTRIC BANDING; GASTRIC BYPASS SURGERY; HUMAN; LAP…	ADULT; ALCOHOLISM; EATING; FEEDING BEHAVIOR; FEMALE; GASTRIC BYPASS; GASTROPLASTY; HEALTH BEHAVIOR; HUMANS; LONGITUDINAL STUDIES; MALE; MIDDLE AGED; OBESITY; POSTOPERATIVE PERIOD; SMOKING; SURVEYS AND QUESTIONNAIRES; WEIGHT LOSS; ALCOHOL; ILLICIT DRUG; ADULT; ALCOHOL CONSUMPTION; ARTICLE; BARIATRIC SURGERY; BEHAVIOR CHANGE; BODY IMAGE; COHORT ANALYSIS; FEEDING BEHAVIOR; FEMALE; GASTRIC BANDING; G…	NEUROPSYCHIATRIC RESEARCH INSTITUTE, 120 S EIGHTH ST, PO BOX 1415, FARGO, 58107, ND, UNITED STATES; UNIVERSITY OF NORTH DAKOTA SCHOOL OF MEDICINE AND HEALTH SCIENCES, GRAND FORKS, UNITED STATES; UNIVERSITY OF PITTSBURGH GRADUATE SCHOOL OF PUBLIC HEALTH, PITTSBURGH, PA, UNITED STATES; DEPARTMENT OF SURGERY, UNIVERSITY OF WASHINGTON, SEATTLE, UNITED STATES; DEPARTMENT OF SURGERY, WEILL-CORNELL MEDI…	IMPORTANCE SEVERE OBESITY (BODY MASS INDEX-35 [CALCULATED AS WEIGHT IN KILOGRAMS DIVIDED BY HEIGHT IN METERS SQUARED]) IS ASSOCIATED WITH SIGNIFICANT MEDICAL COMORBIDITY AND INCREASED MORTALITY. BARIATRIC SURGERY INDUCES WEIGHT LOSS, THE EXTENT OF WHICH CAN VARY. POSTOPERATIVE PREDICTORS OF WEIGHT LOSS HAVE NOT BEEN ADEQUATELY EXAMINED. OBJECTIVE TO DESCRIBE POSTOPERATIVE EATING BEHAVIORS AND WEI…			21686254	JAMA SURG.	JAMA SURGERY	ENGLISH		752 – 757	AMERICAN MEDICAL ASSOCIATION		121	MITCHELL J;CHRISTIAN N;FLUM D;POMP A;PORIES W;WOLFE B;COURCOULAS A;BELLE S	10.1001/jamasurg.2016.0395	POSTOPERATIVE BEHAVIORAL VARIABLES AND WEIGHT CHANGE 3 YEARS AFTER BARIATRIC SURGERY	1	2016	MITCHELL JAMES E;CHRISTIAN NICHOLAS J;FLUM DAVID R;POMP ALFONS;PORIES WALTER J;WOLFE BRUCE M;COURCOULAS ANITA P;BELLE STEVEN H	J.E. MITCHELL; NEUROPSYCHIATRIC RESEARCH INSTITUTE, FARGO, 120 S EIGHTH ST, PO BOX 1415, 58107, UNITED STATES; EMAIL: JMITCHELL@NRIFARGO.COM		NEUROPSYCHIATRIC RESEARCH INSTITUTE;UNIVERSITY OF NORTH DAKOTA SCHOOL OF MEDICINE AND HEALTH SCIENCES;UNIVERSITY OF PITTSBURGH GRADUATE SCHOOL OF PUBLIC HEALTH;UNIVERSITY OF WASHINGTON;WEILL-CORNELL MEDICAL CENTER;EAST CAROLINA UNIVERSITY;OREGON HEALTH AND SCIENCE UNIVERSITY;UNIVERSITY OF PITTSBURGH MEDICAL CENTER	MITCHELL J, 2016, JAMA SURG	https://www.scopus.com/inward/record.uri?eid=2-s2.0-84999048345&doi=10.1001%2fjamasurg.2016.0395&partnerID=40&md5=35cc46d523fcd3761f1fdb114892fa11	SCOPUS
ADULT; ANESTHESIA RECOVERY PERIOD; ANESTHETICS; INHALATION; ELECTROENCEPHALOGRAPHY; FEMALE; GASTRIC BYPASS; HEMODYNAMIC PROCESSES; HUMANS; ISOFLURANE; LAPAROTOMY; MALE; METHYL ETHERS; MIDDLE AGED; OBESITY; MORBID; OXYGEN; POSTOPERATIVE NAUSEA AND VOMITING; PROSPECTIVE STUDIES; ANTIEMETIC AGENT; DESFLURANE; ETILEFRINE; GLYCOPYRRONIUM BROMIDE; LOCAL ANESTHETIC AGENT; METOCLOPRAMIDE; MIDAZOLAM; MORP…	ADULT; ANESTHESIA RECOVERY PERIOD; ANESTHETICS; INHALATION; ELECTROENCEPHALOGRAPHY; FEMALE; GASTRIC BYPASS; HEMODYNAMIC PROCESSES; HUMANS; ISOFLURANE; LAPAROTOMY; MALE; METHYL ETHERS; MIDDLE AGED; OBESITY; MORBID; OXYGEN; POSTOPERATIVE NAUSEA AND VOMITING; PROSPECTIVE STUDIES; ANTIEMETIC AGENT; DESFLURANE; ETILEFRINE; GLYCOPYRRONIUM BROMIDE; LOCAL ANESTHETIC AGENT; METOCLOPRAMIDE; MIDAZOLAM; MORP…	DEPARTMENT OF ANESTHESIOLOGY, KECK SCHOOL OF MEDICINE, UNIVERSITY OF SOUTHERN CALIFORNIA, LOS ANGELES, CA, UNITED STATES; DEPARTMENT OF ANESTHESIOLOGY, UNIVERSITY HOSPITAL, UNIVERSITY OF SOUTHERN CALIFORNIA, LOS ANGELES, CA 90033, 1500 SAN PABLO STREET, UNITED STATES	WE COMPARED POSTOPERATIVE RECOVERY AFTER DESFLURANE (N = 25) VERSUS SEVOFLURANE (N = 25) ANESTHESIA IN MORBIDLY OBESE ADULTS (BODY MASS INDEX ≥35) WHO UNDERWENT GASTROINTESTINAL BYPASS SURGERY VIA AN OPEN LAPAROTOMY. AFTER PREMEDITATION WITH MIDAZOLAM AND METOCLOPRAMIDE 1 H BEFORE SURGERY, EPIDURAL CATHETER PLACEMENT, INDUCTION OF ANESTHESIA WITH FENTANYL AND PROPOFOL, AND TRACHEAL INTUBATION FAC…			00032999	ANESTH. ANALG.	ANESTHESIA AND ANALGESIA	ENGLISH		1848 – 1853			120	STRUM E;SZENOHRADSZKI J;KAUFMAN W;ANTHONE G;MANZ I;LUMB P	10.1213/01.ANE.0000136472.01079.95	EMERGENCE AND RECOVERY CHARACTERISTICS OF DESFLURANE VERSUS SEVOFLURANE IN MORBIDLY OBESE ADULT SURGICAL PATIENTS: A PROSPECTIVE RANDOMIZED STUDY	1	2004	STRUM EARL M;SZENOHRADSZKI JANOS;KAUFMAN WAYNE A;ANTHONE GARY J;MANZ INGRID L;LUMB PHILIP D	E.M. STRUM; DEPARTMENT OF ANESTHESIOLOGY, UNIVERSITY HOSPITAL, UNIVERSITY OF SOUTHERN CALIFORNIA, LOS ANGELES, CA 90033, 1500 SAN PABLO STREET, UNITED STATES; EMAIL: EARL.STRUM@TENETHEALTH.COM		UNIVERSITY OF SOUTHERN CALIFORNIA;UNIVERSITY HOSPITAL	STRUM E, 2004, ANESTH ANALG	https://www.scopus.com/inward/record.uri?eid=2-s2.0-9244233384&doi=10.1213%2f01.ANE.0000136472.01079.95&partnerID=40&md5=80f5c1d809ccc6b4073d6b617ae5859a	SCOPUS
BARIATRIC SURGERY; MORBID OBESITY; NADROPARIN; PROPHYLAXIS; RANDOMIZED; ADULT; ANASTOMOSIS; ROUX-EN-Y; ANTICOAGULANTS; BODY MASS INDEX; FEMALE; GASTRIC BYPASS; HUMANS; INJECTIONS; SUBCUTANEOUS; LENGTH OF STAY; MALE; MIDDLE AGED; OBESITY; MORBID; PILOT PROJECTS; POSTOPERATIVE COMPLICATIONS; PREMEDICATION; PROSPECTIVE STUDIES; STOMACH; THROMBOEMBOLISM; TREATMENT OUTCOME; ULTRASONOGRAPHY; DOPPLER; C…	ADULT; ANASTOMOSIS; ROUX-EN-Y; ANTICOAGULANTS; BODY MASS INDEX; FEMALE; GASTRIC BYPASS; HUMANS; INJECTIONS; SUBCUTANEOUS; LENGTH OF STAY; MALE; MIDDLE AGED; NADROPARIN; OBESITY; MORBID; PILOT PROJECTS; POSTOPERATIVE COMPLICATIONS; PREMEDICATION; PROSPECTIVE STUDIES; STOMACH; THROMBOEMBOLISM; TREATMENT OUTCOME; ULTRASONOGRAPHY; DOPPLER; COLOR; BLOOD CLOTTING FACTOR 10A; D DIMER; FIBRINOGEN; LOW MO…	NUTRITION SUPPORT AND MORBID OBESITY CLINIC, UNIVERSITY OF PATRAS, PATRAS, GREECE	BACKGROUND: OBESE PATIENTS UNDERGOING BARIATRIC SURGERY ARE AT A HIGH RISK OF DEVELOPING FATAL PULMONARY EMBOLISM OR POST-THROMBOTIC SYNDROME. THE PROPHYLACTIC USE OF LOW MOLECULAR WEIGHT HEPARINS (LMWHS) IS CORRELATED WITH A SIGNIFICANT REDUCTION IN POST-OPERATIVE VENOUS THROMBOSIS IN PATIENTS UNDERGOING ORTHOPEDIC OR GENERAL SURGERY. IN MORBIDITY OBESE PATIENTS, THE LIMITED NUMBER OF COMPARATIV…			09608923	OBES. SURG.	OBESITY SURGERY	ENGLISH		670 – 676			117	KALFARENTZOS F;STAVROPOULOU F;YARMENITIS S;KEHAGIAS I;KARAMESINI M;DIMITRAKOPOULOS A;MANIATI A	10.1381/09608920160558588	PROPHYLAXIS OF VENOUS THROMBOEMBOLISM USING TWO DIFFERENT DOSES OF LOWMOLECULARWEIGHT HEPARIN (NADROPARIN) IN BARIATRIC SURGERY: A PROSPECTIVE RANDOMIZED TRIAL	1	2001	KALFARENTZOS FOTIS;STAVROPOULOU FOTINI;YARMENITIS SPYROS;KEHAGIAS IOANNIS;KARAMESINI MARIA;DIMITRAKOPOULOS ATHANASIOS;MANIATI ALIKI		Bariatric surgery; Morbid obesity; Nadroparin; Prophylaxis; Randomized	UNIVERSITY OF PATRAS	KALFARENTZOS F, 2001, OBES SURG	https://www.scopus.com/inward/record.uri?eid=2-s2.0-0035659688&doi=10.1381%2f09608920160558588&partnerID=40&md5=f265b9a978a8d5f6bd503bd46b8881bd	SCOPUS
INDUCED WEIGHT-LOSS; LONG-TERM OUTCOMES; MEDICAL THERAPY; BYPASS-SURGERY; GASTRIC BYPASS; TYPE-2; MANAGEMENT; INTERVENTION; IMPROVEMENT; REMISSION	INDUCED WEIGHT-LOSS; LONG-TERM OUTCOMES; MEDICAL THERAPY; BYPASS-SURGERY; GASTRIC BYPASS; TYPE-2; MANAGEMENT; INTERVENTION; IMPROVEMENT; REMISSION	O'BRIEN, PE (CORRESPONDING AUTHOR), MONASH UNIV, CTR OBES RES \& EDUC, MELBOURNE, VIC 3004, AUSTRALIA.; WENTWORTH, JOHN M.; PLAYFAIR, JULIE; LAURIE, CHERYL; BROWN, WENDY A.; BURTON, PAUL; O'BRIEN, PAUL E., MONASH UNIV, CTR OBES RES \& EDUC, MELBOURNE, VIC 3004, AUSTRALIA.; WENTWORTH, JOHN M.; RITCHIE, MATTHEW E., ROYAL MELBOURNE HOSP, WALTER \& ELIZA HALL INST MED RES, DIV MOL MED, MELBOURNE, VIC…	BACKGROUND BARIATRIC SURGERY IMPROVES GLYCAEMIA IN OBESE PEOPLE WITH TYPE 2 DIABETES, BUT ITS EFFECTS ARE UNCERTAIN IN OVERWEIGHT PEOPLE WITH THIS DISEASE. WE AIMED TO IDENTIFY WHETHER LAPAROSCOPIC ADJUSTABLE GASTRIC BAND SURGERY CAN IMPROVE GLUCOSE CONTROL IN PEOPLE WITH TYPE 2 DIABETES WHO WERE OVERWEIGHT BUT NOT OBESE. METHODS WE DID AN OPEN-LABEL, PARALLEL-GROUP, RANDOMISED CONTROLLED TRIAL B…	STE 800, 230 PARK AVE, NEW YORK, NY 10169 USA	MONASH UNIVERSITY; MELBOURNE HEALTH; ROYAL MELBOURNE HOSPITAL; BAKER HEART AND DIABETES INSTITUTE	2213-8587	LANCET DIABETES ENDOCRINOL.	LANCET DIABETES \& ENDOCRINOLOGY	ENGLISH	WENTWORTH, JOHN/0000-0002-5197-3529 BROWN, WENDY/0000-0002-0137-2688 RITCHIE, MATTHEW/0000-0002-7383-0609	545-552	ELSEVIER SCIENCE INC	ENDOCRINOLOGY \& METABOLISM	117	WENTWORTH J;PLAYFAIR J;LAURIE C;RITCHIE ;MATTHEW E M;BROWN W;BURTON P;SHAW J;O'BRIEN P	10.1016/S2213-8587(14)70066-X	MULTIDISCIPLINARY DIABETES CARE WITH AND WITHOUT BARIATRIC SURGERY IN OVERWEIGHT PEOPLE: A RANDOMISED CONTROLLED TRIAL	1	2014	WENTWORTH JOHN M;PLAYFAIR JULIE;LAURIE CHERYL;RITCHIE; MATTHEW E;BROWN WENDY A;BURTON PAUL;SHAW JONATHAN E;O'BRIEN PAUL E	O'BRIEN, PE (CORRESPONDING AUTHOR), MONASH UNIV, CTR OBES RES \& EDUC, MELBOURNE, VIC 3004, AUSTRALIA		MONASH UNIV;MONASH UNIV;WALTER AND ELIZA HALL INST MED RES;BAKER IDI HEART AND DIABET INST	WENTWORTH J, 2014, LANCET DIABETES ENDOCRINOL		ISI
Y GASTRIC BYPASS; WEIGHT-LOSS MAINTENANCE; PHYSICAL-ACTIVITY; GLUCOSE; EFFECTIVENESS; CARDIORESPIRATORY FITNESS; OVERWEIGHT; RESISTANCE; IMPACT; REMISSION; MORTALITY	Y GASTRIC BYPASS; WEIGHT-LOSS MAINTENANCE; PHYSICAL-ACTIVITY; GLUCOSE; EFFECTIVENESS; CARDIORESPIRATORY FITNESS; OVERWEIGHT; RESISTANCE; IMPACT; REMISSION; MORTALITY	GOODPASTER, BH (CORRESPONDING AUTHOR), FLORIDA HOSP SANFORD BURNHAM MED RES INST, TRANSLAT RES INST METAB \& DIABET, 301 EAST PRINCETON ST, ORLANDO, FL 32804 USA.; COEN, PAUL M.; HELBLING, NICOLE L.; HAMES, KAZANNA C.; STEFANOVIC-RACIC, MAJA; TOLEDO, FREDERICO G. S.; GOODPASTER, BRET H., UNIV PITTSBURGH, DEPT MED, DIV ENDOCRINOL \& METAB, PITTSBURGH, PA USA.; COEN, PAUL M.; JAKICIC, JOHN M., UNIV…	BACKGROUND. ROUX-EN-Y GASTRIC BYPASS (RYGB) SURGERY CAUSES PROFOUND WEIGHT LOSS AND IMPROVES INSULIN SENSITIVITY (51) IN OBESE PATIENTS. REGULAR EXERCISE CAN ALSO IMPROVES S-1 IN OBESE INDIVIDUALS; HOWEVER, IT IS UNKNOWN WHETHER EXERCISE AND RYGB SURGERY-INDUCED WEIGHT LOSS WOULD ADDITIVELY IMPROVE S-1 AND OTHER CARDIOMETABOLIC FACTORS. METHODS. WE CONDUCTED A SINGLE-BLIND, PROSPECTIVE, RANDOMIZE…	2015 MANCHESTER RD, ANN ARBOR, MI 48104 USA	PENNSYLVANIA COMMONWEALTH SYSTEM OF HIGHER EDUCATION (PCSHE); UNIVERSITY OF PITTSBURGH; PENNSYLVANIA COMMONWEALTH SYSTEM OF HIGHER EDUCATION (PCSHE); UNIVERSITY OF PITTSBURGH; UNIVERSITY OF NORTH CAROLINA; EAST CAROLINA UNIVERSITY; ADVENTIST HEALTH SERVICES; ADVENTHEALTH; PENNSYLVANIA COMMONWEALTH SYSTEM OF HIGHER EDUCATION (PCSHE); UNIVERSITY OF PITTSBURGH	0021-9738	J. CLIN. INVEST.	JOURNAL OF CLINICAL INVESTIGATION	ENGLISH	COEN, PAUL/0000-0002-2805-2115 GRANCHI STEIDEL DE TOLEDO, FREDERICO/0000-0002-6570-9948	248-257	AMER SOC CLINICAL INVESTIGATION INC	RESEARCH \& EXPERIMENTAL MEDICINE	117	COEN P;TANNER C;HELBLING N;DUBIS ;GABRIEL S G;HAMES K;XIE H;EID G;STEFANOVIC-RACIC M;TOLEDO F;JAKICIC J;HOUMARD J;GOODPASTER B	10.1172/JCI78016	CLINICAL TRIAL DEMONSTRATES EXERCISE FOLLOWING BARIATRIC SURGERY IMPROVES INSULIN SENSITIVITY	1	2015	COEN PAUL M;TANNER CHARLES J;HELBLING NICOLE L;DUBIS; GABRIEL S;HAMES KAZANNA C;XIE HUI;EID GEORGE M; STEFANOVIC-RACIC MAJA;TOLEDO FREDERICO G S;JAKICIC JOHN M;HOUMARD JOSEPH A;GOODPASTER BRET H	GOODPASTER, BH (CORRESPONDING AUTHOR), FLORIDA HOSP SANFORD BURNHAM MED RES INST, TRANSLAT RES INST METAB \& DIABET, 301 EAST PRINCETON ST, ORLANDO, FL 32804 USA		FLORIDA HOSP SANFORD BURNHAM MED RES INST;UNIV PITTSBURGH;UNIV PITTSBURGH;E CAROLINA UNIV;TRANSLAT RES INST METAB AND DIABET;UNIV PITTSBURGH	COEN P, 2015, J CLIN INVEST		ISI
BARIATRIC SURGERY; GERD; HIGH-RESOLUTION MANOMETRY; IMPEDANCE; MII-PH; OBESITY; OMEGA-LOOP GASTRIC BYPASS; ONE-ANASTOMOSIS GASTRIC BYPASS; REFLUX; ADULT; ELECTRIC IMPEDANCE; ESOPHAGOGASTRIC JUNCTION; FEMALE; FOLLOW-UP STUDIES; GASTRIC BYPASS; GASTROESOPHAGEAL REFLUX; HUMANS; ITALY; MALE; MANOMETRY; MORBID; PRESSURE; RETROSPECTIVE STUDIES; TREATMENT OUTCOME; 24 HOUR PH IMPEDANCE MONITORING; ARTICL…	ADULT; ELECTRIC IMPEDANCE; ESOPHAGOGASTRIC JUNCTION; FEMALE; FOLLOW-UP STUDIES; GASTRIC BYPASS; GASTROESOPHAGEAL REFLUX; HUMANS; ITALY; MALE; MANOMETRY; OBESITY; MORBID; PRESSURE; RETROSPECTIVE STUDIES; TREATMENT OUTCOME; 24 HOUR PH IMPEDANCE MONITORING; ADULT; ARTICLE; CATHETER; CLINICAL ARTICLE; CLINICAL ASSESSMENT; CONTROLLED CLINICAL TRIAL; CONTROLLED STUDY; DYSPEPSIA; ESOPHAGITIS; ESOPHAGOGA…	DIVISION OF GENERAL AND BARIATRIC SURGERY, DEPARTMENT OF SURGERY, SECOND UNIVERSITY OF NAPLES, VIA PANSINI 17, NAPLES, 80131, ITALY; GENERAL AND BARIATRIC SURGERY UNIT, CAMILLIANI HOSPITAL, CASORIA, ITALY; GASTROENTEROLOGY UNIT, DEPARTMENT OF SURGERY, ONCOLOGY AND GASTROENTEROLOGY, UNIVERSITY OF PADUA, PADUA, ITALY	BACKGROUND: AT PRESENT, NO OBJECTIVE DATA ARE AVAILABLE ON THE EFFECT OF OMEGA-LOOP GASTRIC BYPASS (OGB) ON GASTROESOPHAGEAL JUNCTION AND REFLUX. OBJECTIVES: TO EVALUATE THE POSSIBLE EFFECTS OF OGB ON ESOPHAGEAL MOTOR FUNCTION AND A POSSIBLE INCREASE IN GASTROESOPHAGEAL REFLUX. SETTING: UNIVERSITY HOSPITAL, ITALY; PUBLIC HOSPITAL, ITALY. METHODS: PATIENTS UNDERWENT CLINICAL ASSESSMENT FOR REFLUX …			15507289	SURG. OBES. RELAT. DIS.	SURGERY FOR OBESITY AND RELATED DISEASES	ENGLISH		62 – 69	ELSEVIER INC.		117	TOLONE S;CRISTIANO S;SAVARINO E;LUCIDO F;FICO D;DOCIMO L	10.1016/j.soard.2015.03.011	EFFECTS OF OMEGALOOP BYPASS ON ESOPHAGOGASTRIC JUNCTION FUNCTION	2	2016	TOLONE SALVATORE;CRISTIANO STEFANO;SAVARINO EDOARDO;LUCIDO FRANCESCO SAVERIO;FICO DOMENICO IVAN;DOCIMO LUDOVICO	S. TOLONE; DIVISION OF GENERAL AND BARIATRIC SURGERY, DEPARTMENT OF SURGERY, SECOND UNIVERSITY OF NAPLES, NAPLES, VIA PANSINI 17, 80131, ITALY; EMAIL: SALVATORE.TOLONE@UNINA2.IT	Bariatric surgery; GERD; High-resolution manometry; Impedance; MII-pH; Obesity; Omega-loop gastric bypass; One-anastomosis gastric bypass; Reflux	SECOND UNIVERSITY OF NAPLES;CAMILLIANI HOSPITAL;UNIVERSITY OF PADUA	TOLONE S, 2016, SURG OBES RELAT DIS	https://www.scopus.com/inward/record.uri?eid=2-s2.0-84959514263&doi=10.1016%2fj.soard.2015.03.011&partnerID=40&md5=87194804c745005ef9430c6f5deea189	SCOPUS
ADULT; DIABETES MELLITUS; TYPE 2; FEMALE; FOLLOW-UP STUDIES; GASTRIC BYPASS; HUMANS; HYPOGLYCEMIC AGENTS; LIFE STYLE; MALE; MIDDLE AGED; OBESITY; PATIENT-CENTERED CARE; QUALITY OF LIFE; RISK REDUCTION BEHAVIOR; TREATMENT OUTCOME; WEIGHT LOSS; WEIGHT REDUCTION PROGRAMS; ANTIDIABETIC AGENT; BODY WEIGHT LOSS; COMPLICATION; CONTROLLED STUDY; FOLLOW UP; GASTRIC BYPASS SURGERY; HUMAN; LIFESTYLE; NON IN…	ADULT; DIABETES MELLITUS; TYPE 2; FEMALE; FOLLOW-UP STUDIES; GASTRIC BYPASS; HUMANS; HYPOGLYCEMIC AGENTS; LIFE STYLE; MALE; MIDDLE AGED; OBESITY; PATIENT-CENTERED CARE; QUALITY OF LIFE; RISK REDUCTION BEHAVIOR; TREATMENT OUTCOME; WEIGHT LOSS; WEIGHT REDUCTION PROGRAMS; ANTIDIABETIC AGENT; ADULT; BODY WEIGHT LOSS; COMPLICATION; CONTROLLED STUDY; FEMALE; FOLLOW UP; GASTRIC BYPASS SURGERY; HUMAN; LI…	DIVISION OF ENDOCRINOLOGY, DIABETES, AND HYPERTENSION, BRIGHAM AND WOMEN'S HOSPITAL, HARVARD MEDICAL SCHOOL, BOSTON, MA, UNITED STATES; RESEARCH DIVISION, JOSLIN DIABETES CENTER, HARVARD MEDICAL SCHOOL, BOSTON, MA, UNITED STATES; CENTER FOR METABOLIC AND BARIATRIC SURGERY, BRIGHAM AND WOMEN'S HOSPITAL, HARVARD MEDICAL SCHOOL, BOSTON, MA, UNITED STATES	TO COMPARE THE EFFECT OF ROUX-EN-Y GASTRIC BYPASS (RYGB) SURGERY VERSUS INTENSIVE MEDICAL DIABETES AND WEIGHT MANAGEMENT (IMWM) ON CLINICAL AND PATIENT-REPORTED OUTCOMES IN OBESE PATIENTS WITH TYPE 2 DIABETES. RESEARCH DESIGN AND METHODS WE PROSPECTIVELY RANDOMIZED 38 OBESE PATIENTS WITH TYPE 2 DIABETES (15 MALE AND 23 FEMALE, WITH MEAN 6 SD WEIGHT 104±16 KG, BMI 36.3±3.4 KG/M2, AGE 52±6 YEARS, A…			01495992	DIABETES CARE	DIABETES CARE	ENGLISH		670 – 679	AMERICAN DIABETES ASSOCIATION INC.		115	SIMONSON D;HALPERIN F;FOSTER K;VERNON A;GOLDFINE A	10.2337/dc17-0487	CLINICAL AND PATIENTCENTERED OUTCOMES IN OBESE PATIENTS WITH TYPE 2 DIABETES 3 YEARS AFTER RANDOMIZATION TO ROUXENY GASTRIC BYPASS SURGERY VERSUS INTENSIVE LIFESTYLE MANAGEMENT: THE SLIMMT2D STUDY	1	2018	SIMONSON DONALD C;HALPERIN FLORENCIA;FOSTER KATHLEEN;VERNON ASHLEY;GOLDFINE ALLISON B	D.C. SIMONSON; DIVISION OF ENDOCRINOLOGY, DIABETES, AND HYPERTENSION, BRIGHAM AND WOMEN'S HOSPITAL, HARVARD MEDICAL SCHOOL, BOSTON, UNITED STATES; EMAIL: DSIMONSO@HSPH.HARVARD.EDU		HARVARD MEDICAL SCHOOL;HARVARD MEDICAL SCHOOL;HARVARD MEDICAL SCHOOL	SIMONSON D, 2018, DIABETES CARE	https://www.scopus.com/inward/record.uri?eid=2-s2.0-85044516851&doi=10.2337%2fdc17-0487&partnerID=40&md5=8fd5eb076ce66a56c17e8c8caeae6951	SCOPUS
MORBID OBESITY; BARIATRIC SURGERY; GASTRIC BYPASS; LIMB LENGTHS; MALABSORPTION; WEIGHT LOSS; MORBID-OBESITY; LONG-LIMB; WEIGHT-LOSS; GASTROPLASTY; EXCLUSION; SURGERY	MORBID-OBESITY; LONG-LIMB; WEIGHT-LOSS; GASTROPLASTY; EXCLUSION; SURGERY	FLANCBAUM, L (CORRESPONDING AUTHOR), ST LUKES ROOSEVELT CTR WEIGHT LOSS SURG, NEW YORK OBES RES CTR, 1090 AMSTERDAM AVE,12TH FLOOR, NEW YORK, NY 10025 USA.; ST LUKES ROOSEVELT CTR WEIGHT LOSS SURG, NEW YORK OBES RES CTR, NEW YORK, NY 10025 USA.; OHIO STATE UNIV, COLUMBUS, OH 43210 USA.; BARIATR TREATMENT CTR OHIO, COLUMBUS, OH USA.; COLUMBIA UNIV COLL PHYS \& SURG, NEW YORK, NY 10032 USA.	BACKGROUND: THE EFFECT OF LIMB-LENGTH ON WEIGHT LOSS AFTER ROUX-EN-Y GASTRIC BYPASS (RYGBP) IS CONTROVERSIAL; HENCE, THE OPTIMAL LIMB-LENGTHS HAVE NOT BEEN DETERMINED. THIS STUDY EVALUATED THE EFFECT OF DIFFERENT LIMB-LENGTHS ON WEIGHT LOSS AFTER RYGBP. METHODS: THE STUDY WAS A PROSPECTIVE RANDOMIZED CLINICAL TRIAL IN WHICH PATIENTS UNDERGOING RYGBP (110 F, 24 M; MEAN AGE 39.7) WERE RANDOMIZED AS…	3100 BAYVIEW AVE, UNIT 4, TORONTO, ONTARIO M2N 5L3, CANADA	MOUNT SINAI WEST; MOUNT SINAI ST. LUKE'S; UNIVERSITY SYSTEM OF OHIO; OHIO STATE UNIVERSITY; COLUMBIA UNIVERSITY	0960-8923	OBES. SURG.	OBESITY SURGERY	ENGLISH		540-545	F D-COMMUNICATIONS INC	SURGERY	114	CHOBAN P;FLANCBAUM L	10.1007/s11695-015-1713-8	THE EFFECT OF ROUX LIMB LENGTHS ON OUTCOME AFTER ROUXENY GASTRIC BYPASS: A PROSPECTIVE RANDOMIZED CLINICAL TRIAL	1	2002	CHOBAN PS;FLANCBAUM L	FLANCBAUM, L (CORRESPONDING AUTHOR), ST LUKES ROOSEVELT CTR WEIGHT LOSS SURG, NEW YORK OBES RES CTR, 1090 AMSTERDAM AVE,12TH FLOOR, NEW YORK, NY 10025 USA	morbid obesity; bariatric surgery; gastric bypass; limb lengths; malabsorption; weight loss	ST LUKES ROOSEVELT CTR WEIGHT LOSS SURG;ST LUKES ROOSEVELT CTR WEIGHT LOSS SURG;OHIO STATE UNIV;BARIATR TREATMENT CTR OHIO;COLUMBIA UNIV COLL PHYS AND SURG	CHOBAN P, 2002, OBES SURG		ISI
BARIATRIC SURGERY; ROUX-EN-Y GASTRIC BYPASS; SLEEVE GASTRECTOMY; TYPE 2 DIABETES; ADULT; DIABETES MELLITUS; TYPE 2; FEMALE; GASTRECTOMY; GASTRIC BYPASS; HUMANS; MALE; MIDDLE AGED; OBESITY; HEMOGLOBIN A1C; AGED; ARTICLE; BODY COMPOSITION; CLINICAL ARTICLE; CLINICAL EFFECTIVENESS; CLINICAL EVALUATION; CONTROLLED STUDY; FAT FREE MASS; FOLLOW UP; GLUCOSE TOLERANCE; HEMOGLOBIN BLOOD LEVEL; HUMAN; INTE…	ADULT; DIABETES MELLITUS; TYPE 2; FEMALE; GASTRECTOMY; GASTRIC BYPASS; HUMANS; MALE; MIDDLE AGED; OBESITY; HEMOGLOBIN A1C; ADULT; AGED; ARTICLE; BODY COMPOSITION; CLINICAL ARTICLE; CLINICAL EFFECTIVENESS; CLINICAL EVALUATION; CONTROLLED STUDY; FAT FREE MASS; FEMALE; FOLLOW UP; GLUCOSE TOLERANCE; HEMOGLOBIN BLOOD LEVEL; HUMAN; INTERMETHOD COMPARISON; LEAN BODY WEIGHT; MALE; NON INSULIN DEPENDENT D…	DEPARTMENT OF SURGERY, BARIATRIC SURGERY CLINIC, RABIN MEDICAL CENTER, PETACH TIKVA, ISRAEL; DEPARTMENT OF HUMAN METABOLISM AND NUTRITION, BRAUN SCHOOL OF PUBLIC HEALTH, HEBREW UNIVERSITY SCHOOL OF MEDICINE, JERUSALEM, PO BOX 12272 91120, ISRAEL	AIMS/HYPOTHESIS: BARIATRIC SURGERY IS GAINING ACCEPTANCE AS A 'METABOLIC SURGICAL INTERVENTION' FOR PATIENTS WITH TYPE 2 DIABETES. THE OPTIMAL FORM OF SURGERY AND THE MECHANISM OF ACTION OF THESE PROCEDURES ARE MUCH DEBATED. WE COMPARED TWO BARIATRIC PROCEDURES FOR OBESE PATIENTS WITH TYPE 2 DIABETES AND EVALUATED THEIR EFFECTS ON HBA1C AND GLUCOSE TOLERANCE. METHODS: WE PERFORMED A PARALLEL UN-B…			14320428	DIABETOLOGIA	DIABETOLOGIA	ENGLISH		1914 – 1918			114	KEIDAR A;HERSHKOP K;MARKO L;SCHWEIGER C;HECHT L;BARTOV N;KEDAR A;WEISS R	10.1007/s00125-013-2965-2	ROUXENY GASTRIC BYPASS VS SLEEVE GASTRECTOMY FOR OBESE PATIENTS WITH TYPE 2 DIABETES: A RANDOMISED TRIAL	2	2013	KEIDAR ANDREI;HERSHKOP KAREN J;MARKO LIMOR;SCHWEIGER CHAYA;HECHT LIOR;BARTOV NOAM;KEDAR ASSAF;WEISS RAM	R. WEISS; DEPARTMENT OF HUMAN METABOLISM AND NUTRITION, BRAUN SCHOOL OF PUBLIC HEALTH, HEBREW UNIVERSITY SCHOOL OF MEDICINE, JERUSALEM, PO BOX 12272 91120, ISRAEL; EMAIL: RAM.WEISS@EKMD.HUJI.AC.IL	Bariatric surgery; Roux-en-Y gastric bypass; Sleeve gastrectomy; Type 2 diabetes	RABIN MEDICAL CENTER;HEBREW UNIVERSITY SCHOOL OF MEDICINE	KEIDAR A, 2013, DIABETOLOGIA	https://www.scopus.com/inward/record.uri?eid=2-s2.0-84881611132&doi=10.1007%2fs00125-013-2965-2&partnerID=40&md5=98d903a72f8056caa8a710b9b549a235	SCOPUS
OBESITY; TYPE 2 DIABETES MELLITUS; BARIATRIC; RANDOMIZED CONTROLLED; TRIAL; GASTRIC BYPASS-SURGERY; MEDICAL-MANAGEMENT; METABOLIC SURGERY; OBESE-PATIENTS; WEIGHT-LOSS; TYPE-2; THERAPY; MELLITUS	GASTRIC BYPASS-SURGERY; MEDICAL-MANAGEMENT; METABOLIC SURGERY; OBESE-PATIENTS; WEIGHT-LOSS; TYPE-2; THERAPY; MELLITUS	COURCOULAS, AP (CORRESPONDING AUTHOR), UNIV PITTSBURGH, DEPT SURG, 3380 BLVD ALLIES,SUITE 390, PITTSBURGH, PA 15213 USA.; COURCOULAS, ANITA P.; GALLAGHER, JAMES W.; EAGLETON, EMILY B.; PUNCHAI, SURIYA, UNIV PITTSBURGH, DEPT SURG, PITTSBURGH, PA 15201 USA.; NEIBERG, REBECCA H., WAKE FOREST SCH MED, DEPT BIOSTAT \& DATA SCI, WINSTON SALEM, NC 27101 USA.; DELANY, JAMES P., ADVENTHLTH, TRANSLAT RES I…	CONTEXT: QUESTIONS REMAIN ABOUT BARIATRIC SURGERY FOR TYPE 2 DIABETES MELLITUS (T2DM) TREATMENT. OBJECTIVE: COMPARE THE REMISSION OF T2DM FOLLOWING SURGICAL OR NONSURGICAL TREATMENTS. DESIGN, SETTING, AND PARTICIPANTS: RANDOMIZED CONTROLLED TRIAL AT THE UNIVERSITY OF PITTSBURGH, IN THE UNITED STATES. FIVE-YEAR FOLLOW-UP FROM FEBRUARY 2015 UNTIL JUNE 2016. INTERVENTIONS: 61 PARTICIPANTS WITH OBESI…	2055 L ST NW, SUITE 600, WASHINGTON, DC 20036 USA	PENNSYLVANIA COMMONWEALTH SYSTEM OF HIGHER EDUCATION (PCSHE); UNIVERSITY OF PITTSBURGH; WAKE FOREST UNIVERSITY; ADVENTIST HEALTH SERVICES; ADVENTHEALTH; UNIVERSITY OF ZURICH; UNIVERSITY ZURICH HOSPITAL; KHON KAEN UNIVERSITY; PENNSYLVANIA COMMONWEALTH SYSTEM OF HIGHER EDUCATION (PCSHE); UNIVERSITY OF PITTSBURGH; PENNSYLVANIA COMMONWEALTH SYSTEM OF HIGHER EDUCATION (PCSHE); UNIVERSITY OF PITTSBURGH	0021-972X	J. CLIN. ENDOCRINOL. METAB.	JOURNAL OF CLINICAL ENDOCRINOLOGY \& METABOLISM	ENGLISH		866-876	ENDOCRINE SOC	ENDOCRINOLOGY \& METABOLISM	114	COURCOULAS A;GALLAGHER J;NEIBERG R;EAGLETON E;DELANY J;LANG W;PUNCHAI ;SURIYA S;GOURASH W;JAKICIC J	10.1210/clinem/dgaa006	BARIATRIC SURGERY VS LIFESTYLE INTERVENTION FOR DIABETES TREATMENT: 5YEAR OUTCOMES FROM A RANDOMIZED TRIAL	2	2020	COURCOULAS ANITA P;GALLAGHER JAMES W;NEIBERG REBECCA H; EAGLETON EMILY B;DELANY JAMES P;LANG WEI;PUNCHAI; SURIYA;GOURASH WILLIAM;JAKICIC JOHN M	COURCOULAS, AP (CORRESPONDING AUTHOR), UNIV PITTSBURGH, DEPT SURG, 3380 BLVD ALLIES,SUITE 390, PITTSBURGH, PA 15213 USA	Obesity; type 2 diabetes mellitus; bariatric; randomized controlled; trial	UNIV PITTSBURGH;UNIV PITTSBURGH;WAKE FOREST SCH MED;TRANSLAT RES INST METAB AND DIABET;UNIV SPITAL ZURICH;KHON KAEN UNIV;UNIV PITTSBURGH;UNIV PITTSBURGH	COURCOULAS A, 2020, J CLIN ENDOCRINOL METAB		ISI
ADULT; ALDOSTERONE; BLOOD UREA NITROGEN; CREATININE; FEMALE; GASTRIC BYPASS; HUMANS; INTRAOPERATIVE PERIOD; KIDNEY; LAPAROSCOPY; MALE; OBESITY; MORBID; PNEUMOPERITONEUM; ARTIFICIAL; RENIN; TIME FACTORS; URINE; VASOPRESSINS; VASOPRESSIN; AGE; ALDOSTERONE BLOOD LEVEL; ARTICLE; BODY MASS; CLINICAL TRIAL; CONTROLLED CLINICAL TRIAL; CONTROLLED STUDY; CREATININE BLOOD LEVEL; GENDER; HUMAN; KIDNEY FUNCT…	ADULT; ALDOSTERONE; BLOOD UREA NITROGEN; CREATININE; FEMALE; GASTRIC BYPASS; HUMANS; INTRAOPERATIVE PERIOD; KIDNEY; LAPAROSCOPY; MALE; OBESITY; MORBID; PNEUMOPERITONEUM; ARTIFICIAL; RENIN; TIME FACTORS; URINE; VASOPRESSINS; ALDOSTERONE; CREATININE; RENIN; VASOPRESSIN; ADULT; AGE; ALDOSTERONE BLOOD LEVEL; ARTICLE; BODY MASS; CLINICAL TRIAL; CONTROLLED CLINICAL TRIAL; CONTROLLED STUDY; CREATININE B…	SURGERY, UNIVERSITY OF CALIFORNIA DAVIS MEDICAL CENTER, SACRAMENTO, CA, UNITED STATES; DEPARTMENT OF ANESTHESIOLOGY, UNIVERSITY OF CALIFORNIA DAVIS MEDICAL CENTER, SACRAMENTO, CA, UNITED STATES; DEPARTMENT OF SURGERY, UNIVERSITY OF CALIFORNIA DAVIS MEDICAL CENTER, ORANGE, CA 92868-3298, 101 THE CITY DRIVE, BLDG 53, UNITED STATES	BACKGROUND: INTRAOPERATIVE OLIGURIA IS COMMON DURING LAPAROSCOPIC OPERATIONS. THE OBJECTIVE OF THIS STUDY WAS TO EVALUATE THE EFFECTS OF PROLONGED PNEUMOPERITONEUM DURING LAPAROSCOPIC GASTRIC BYPASS (GBP) ON INTRAOPERATIVE URINE OUTPUT AND RENAL FUNCTION. METHODS: 104 PATIENTS WITH A BODY MASS INDEX BETWEEN 40 AND 60 KG/M2 WERE RANDOMLY ASSIGNED TO LAPAROSCOPIC (N = 54) OR OPEN (N = 50) GBP. INTR…			10727515	J. AM. COLL. SURG.	JOURNAL OF THE AMERICAN COLLEGE OF SURGEONS	ENGLISH		476 – 483			113	NGUYEN N;PEREZ R;FLEMING N;RIVERS R;WOLFE B	10.1016/S1072-7515(02)01321-2	EFFECT OF PROLONGED PNEUMOPERITONEUM ON INTRAOPERATIVE URINE OUTPUT DURING LAPAROSCOPIC GASTRIC BYPASS	1	2002	NGUYEN NINH T;PEREZ RICHARD V;FLEMING NEAL;RIVERS RYAN;WOLFE BRUCE M			UNIVERSITY OF CALIFORNIA DAVIS MEDICAL CENTER;UNIVERSITY OF CALIFORNIA DAVIS MEDICAL CENTER;UNIVERSITY OF CALIFORNIA DAVIS MEDICAL CENTER	NGUYEN N, 2002, J AM COLL SURG	https://www.scopus.com/inward/record.uri?eid=2-s2.0-0036790890&doi=10.1016%2fS1072-7515%2802%2901321-2&partnerID=40&md5=c5d53fd98a228f383253b3118ad1d9a2	SCOPUS
ADULT; BODY MASS INDEX; DIABETES MELLITUS, TYPE 2/COMPLICATIONS; DYSLIPIDEMIAS/COMPLICATIONS; FEMALE; FOLLOW-UP STUDIES; GASTRECTOMY/METHODS; GASTRIC BYPASS/METHODS; HUMANS; HYPERTENSION/COMPLICATIONS; MALE; MIDDLE AGED; OBESITY, MORBID/COMPLICATIONS/SURGERY; PROSPECTIVE STUDIES; REOPERATION; TREATMENT OUTCOME; WEIGHT LOSS	ADULT;BODY MASS INDEX;DIABETES MELLITUS, TYPE 2/COMPLICATIONS;DYSLIPIDEMIAS/COMPLICATIONS;FEMALE;FOLLOW-UP STUDIES;GASTRECTOMY/METHODS;GASTRIC BYPASS/METHODS;HUMANS;HYPERTENSION/COMPLICATIONS;MALE;MIDDLE AGED;OBESITY, MORBID/COMPLICATIONS/SURGERY;PROSPECTIVE STUDIES;REOPERATION;TREATMENT OUTCOME;WEIGHT LOSS	BARIATRIC SURGERY UNIT, CENTRO DE EXCELENCIA PARA EL ESTUDIO Y TRATAMIENTO DE LA OBESIDAD, VALLADOLID, SPAIN.; JRUIZTOVAR@GMAIL.;COM.; BARIATRIC SURGERY UNIT, GENERAL UNIVERSITY HOSPITAL ELCHE, ALICANTE, SPAIN.; JRUIZTOVAR@GMAIL.;COM.; BARIATRIC SURGERY UNIT, CENTRO DE EXCELENCIA PARA EL ESTUDIO Y TRATAMIENTO DE LA OBESIDAD, VALLADOLID, SPAIN.; BARIATRIC SURGERY UNIT, CENTRO DE EXCELENCIA PARA EL…	BACKGROUND: ONE-ANASTOMOSIS GASTRIC BYPASS (OAGB) HAS EXPONENTIALLY INCREASED IN THE LAST DECADE, AS IT IS ASSOCIATED WITH VERY LOW COMPLICATIONS, MORTALITY, READMISSIONS AND REOPERATIONS RATES, AND SHOWS EXCELLENT SHORT- AND LONG-TERM BENEFITS OF WEIGHT LOSS AND RESOLUTION OF COMORBIDITIES. THE AIM OF THIS STUDY WAS TO COMPARE THE EFFECT OF SG, RYGB, AND OAGB, ON SHORT- AND LONG-TERM WEIGHT LOSS…			1432-2218 (ELECTRONIC) 0930-2794 (LINKING)		SURGICAL ENDOSCOPY AND OTHER INTERVENTIONAL TECHNIQUES	ENG		401-410			113	RUIZ-TOVAR J;CARBAJO M;JIMENEZ J;CASTRO M;GONZALEZ G;ORTIZ-DE-SOLORZANO J;ZUBIAGA L	10.1007/S00464-018-6307-9	LONGTERM FOLLOWUP AFTER SLEEVE GASTRECTOMY VERSUS ROUXENY GASTRIC BYPASS VERSUS ONEANASTOMOSIS GASTRIC BYPASS: A PROSPECTIVE RANDOMIZED COMPARATIVE STUDY OF WEIGHT LOSS AND REMISSION OF COMORBIDITIES	3	2019	RUIZ-TOVAR, JAIME;CARBAJO, MIGUEL ANGEL;JIMENEZ, JOSE MARIA;CASTRO, MARIA JOSE;GONZALEZ, GILBERTO;ORTIZ-DE-SOLORZANO, JAVIER;ZUBIAGA, LOREA		Adult;Body Mass Index;Diabetes Mellitus, Type 2/complications;Dyslipidemias/complications;Female;Follow-Up Studies;Gastrectomy/methods;Gastric Bypass/methods;Humans;Hypertension/complications;Male;Middle Aged;Obesity, Morbid/complications/surgery;Prospective Studies;Reoperation;Treatment Outcome;Weight Loss	CENTRO DE EXCELENCIA PARA EL ESTUDIO Y TRATAMIENTO DE LA OBESIDAD;GENERAL UNIVERSITY HOSPITAL ELCHE;CENTRO DE EXCELENCIA PARA EL ESTUDIO Y TRATAMIENTO DE LA OBESIDAD;CENTRO DE EXCELENCIA PARA EL ESTUDIO Y TRATAMIENTO DE LA OBESIDAD;CENTRO DE EXCELENCIA PARA EL ESTUDIO Y TRATAMIENTO DE LA OBESIDAD;CENTRO DE EXCELENCIA PARA EL ESTUDIO Y TRATAMIENTO DE LA OBESIDAD;CENTRO DE EXCELENCIA PARA EL ESTUDI…	RUIZ-TOVAR J, 2019, SURG ENDOSC		PUBMED
SEVERE OBESITY; BARIATRIC SURGICAL PROCEDURE; SURGERY FOR OBESITY AND; WEIGHT-RELATED DISEASES; INFLAMMATION; ADIPOKINES; WEIGHT LOSS; COMORBIDITY; TUMOR-NECROSIS-FACTOR; C-REACTIVE PROTEIN; GASTRIC BYPASS-SURGERY; ADIPOSE-TISSUE; INSULIN-RESISTANCE; BARIATRIC SURGERY; FACTOR-ALPHA; SLEEVE GASTRECTOMY; TNF-ALPHA; ASSOCIATION	TUMOR-NECROSIS-FACTOR; C-REACTIVE PROTEIN; GASTRIC BYPASS-SURGERY; ADIPOSE-TISSUE; INSULIN-RESISTANCE; BARIATRIC SURGERY; FACTOR-ALPHA; SLEEVE GASTRECTOMY; TNF-ALPHA; ASSOCIATION	OLIVEIRA, LVF (CORRESPONDING AUTHOR), UNIV CTR ANAPOLIS UNIEVANGEL, SCH MED, SETOR BOUGAINVILLE, RUA GRACIANO A DE SOUZA 514,LOTE 28,QUADRA 07, BR-75075580 ANAPOLIS, GO, BRAZIL.; FREITAS, WILSON R., JR.; PEREZ, EDUARDO A.; ILIAS, ELIAS J.; ALVES, VERA L. S.; KASSAB, PAULO; THULER, FABIO R.; MALHEIROS, CARLOS A., SANTA CASA SAO PAULO MED SCH, RES SURG, SAO PAULO, SP, BRAZIL.; FRANCO OLIVEIRA, LUIS…	BACKGROUND OBESITY IS A WORLDWIDE DISEASE RELATED TO GENETIC, ENVIRONMENTAL, AND BEHAVIORAL FACTORS, AND IT IS ASSOCIATED WITH HIGH RATES OF MORBIDITY AND MORTALITY. RECENTLY, OBESITY HAS BEEN CHARACTERIZED BY A LOW-GRADE INFLAMMATORY STATE KNOWN AS INFLAMMOME INDICATED BY CHRONIC INCREASES IN CIRCULATING CONCENTRATIONS OF INFLAMMATORY MARKERS. THE PURPOSE OF THIS STUDY WAS TO EVALUATE THE EFFECT…	233 SPRING ST, NEW YORK, NY 10013 USA	UNIVERSIDADE NOVE DE JULHO; UNIVERSIDADE NOVE DE JULHO; FUNDACAO OSWALDO CRUZ	0960-8923	OBES. SURG.	OBESITY SURGERY	ENGLISH	ALVES, VERA LUCIA DOS SANTOS/0000-0002-9623-8704 KASSAB, PAULO/0000-0002-5115-6297 RIBEIRO-ALVES, MARCELO/0000-0002-8663-3364 DE OLIVEIRA JUNIOR, MANOEL CARNEIRO/0000-0002-1698-9920 OLIVEIRA, LUIS V F/0000-0002-3852-9415 PAULA VIEIRA, RODOLFO/0000-0001-6379-1143	1931-1942	SPRINGER	SURGERY	112	FREITAS W;FRANCO O L;PEREZ ;EDUARDO A E;ILIAS E;LOTTENBERG C;SILVA ;ANDERSON S A;URBANO J;OLIVEIRA M;VIEIRA R;RIBEIRO-ALVES M;ALVES V;KASSAB P;THULER F;MALHEIROS C	10.1016/S1072-7515(02)01132-8	SYSTEMIC INFLAMMATION IN SEVERE OBESE PATIENTS UNDERGOING SURGERY FOR OBESITY AND WEIGHTRELATED DISEASES	1	2018	FREITAS JR WILSON R;FRANCO OLIVEIRA LUIS VICENTE;PEREZ; EDUARDO A;ILIAS ELIAS J;LOTTENBERG CARINA P;SILVA; ANDERSON S;URBANO JESSICA J;OLIVEIRA JR MANOEL C; VIEIRA RODOLFO P;RIBEIRO-ALVES MARCELO;ALVES VERA L S; KASSAB PAULO;THULER FABIO R;MALHEIROS CARLOS A	OLIVEIRA, LVF (CORRESPONDING AUTHOR), UNIV CTR ANAPOLIS UNIEVANGEL, SCH MED, SETOR BOUGAINVILLE, RUA GRACIANO A DE SOUZA 514,LOTE 28,QUADRA 07, BR-75075580 ANAPOLIS, GO, BRAZIL	Severe obesity; Bariatric surgical procedure; Surgery for obesity and; weight-related diseases; Inflammation; Adipokines; Weight loss; Comorbidity	UNIV CTR ANAPOLIS UNIEVANGEL;SANTA CASA SAO PAULO MED SCH;UNIV CTR ANAPOLIS UNIEVANGEL;SCH HLTH SCI;NOVE DE JULHO UNIV UNINOVE;NOVE DE JULHO UNIV UNINOVE;UNIV BRASIL;EVANDRO CHAGAS RES INST	FREITAS W, 2018, OBES SURG		ISI
ADULT; BARIATRIC SURGERY; BODY MASS INDEX; FEMALE; HUMANS; INTRACRANIAL PRESSURE; PSEUDOTUMOR CEREBRI; TREATMENT OUTCOME; WEIGHT LOSS; WEIGHT REDUCTION PROGRAMS; YOUNG ADULT; ARTICLE; BODY HEIGHT; BODY MASS; BODY WEIGHT; BODY WEIGHT LOSS; BODY WEIGHT MANAGEMENT; CEREBROSPINAL FLUID; CLINICAL EFFECTIVENESS; COHORT ANALYSIS; CONTRAST SENSITIVITY; CONTROLLED STUDY; GASTRIC BANDING; HUMAN; IDIOPATHIC…	ADULT; BARIATRIC SURGERY; BODY MASS INDEX; FEMALE; HUMANS; INTRACRANIAL PRESSURE; PSEUDOTUMOR CEREBRI; TREATMENT OUTCOME; WEIGHT LOSS; WEIGHT REDUCTION PROGRAMS; YOUNG ADULT; ADULT; ARTICLE; BARIATRIC SURGERY; BODY HEIGHT; BODY MASS; BODY WEIGHT; BODY WEIGHT LOSS; BODY WEIGHT MANAGEMENT; CEREBROSPINAL FLUID; CLINICAL EFFECTIVENESS; COHORT ANALYSIS; CONTRAST SENSITIVITY; CONTROLLED STUDY; FEMALE; …	BIRMINGHAM NEURO-OPHTHALMOLOGY, UNIVERSITY HOSPITALS BIRMINGHAM NHS FOUNDATION TRUST, QUEEN ELIZABETH HOSPITAL, BIRMINGHAM, UNITED KINGDOM; DEPARTMENT OF METABOLIC NEUROLOGY, INSTITUTE OF METABOLISM AND SYSTEMS RESEARCH, COLLEGE OF MEDICAL AND DENTAL SCIENCES, UNIVERSITY OF BIRMINGHAM, BIRMINGHAM, UNITED KINGDOM; DEPARTMENT OF NEUROLOGY, UNIVERSITY HOSPITALS BIRMINGHAM NHS FOUNDATION TRUST, QUEEN…	IMPORTANCE: IDIOPATHIC INTRACRANIAL HYPERTENSION (IIH) CAUSES HEADACHES, VISION LOSS, AND REDUCED QUALITY OF LIFE. SUSTAINED WEIGHT LOSS AMONG PATIENTS WITH IIH IS NECESSARY TO MODIFY THE DISEASE AND PREVENT RELAPSE. OBJECTIVE: TO COMPARE THE EFFECTIVENESS OF BARIATRIC SURGERY WITH THAT OF A COMMUNITY WEIGHT MANAGEMENT (CWM) INTERVENTION FOR THE TREATMENT OF PATIENTS WITH ACTIVE IIH. DESIGN, SETT…			21686149	JAMA NEUROL.	JAMA NEUROLOGY	ENGLISH		678 – 686	AMERICAN MEDICAL ASSOCIATION		112	MOLLAN S;MITCHELL J;OTTRIDGE R;AGUIAR M;YIANGOU A;ALIMAJSTOROVIC Z;CARTWRIGHT D;GRECH O;LAVERY G;WESTGATE C;VIJAY V;SCOTTON W;WAKERLEY B;MATTHEWS T;ANSONS A;HICKMAN S;BENZIMRA J;RICK C;SINGHAL R;TAHRANI A;BROCK K;FREW E;SINCLAIR A	10.1001/jamaneurol.2021.0659	EFFECTIVENESS OF BARIATRIC SURGERY VS COMMUNITY WEIGHT MANAGEMENT INTERVENTION FOR THE TREATMENT OF IDIOPATHIC INTRACRANIAL HYPERTENSION: A RANDOMIZED CLINICAL TRIAL	3	2021	MOLLAN SUSAN P;MITCHELL JAMES L;OTTRIDGE RYAN S;AGUIAR MAGDA;YIANGOU ANDREAS;ALIMAJSTOROVIC ZERIN;CARTWRIGHT DAVID M;GRECH OLIVIA;LAVERY GARETH G;WESTGATE CONNAR S J;VIJAY VIVEK;SCOTTON WILLIAM;WAKERLEY BEN R;MATTHEWS TIM D;ANSONS ALEC;HICKMAN SIMON J;BENZIMRA JAMES;RICK CAROLINE;SINGHAL RISHI;TAHRANI ABD A;BROCK KRISTIAN;FREW EMMA;SINCLAIR ALEXANDRA J	A.J. SINCLAIR; DEPARTMENT OF METABOLIC NEUROLOGY, INSTITUTE OF METABOLISM AND SYSTEMS RESEARCH, COLLEGE OF MEDICAL AND DENTAL SCIENCES, UNIVERSITY OF BIRMINGHAM, BIRMINGHAM, B15 2TT, UNITED KINGDOM; EMAIL: A.B.SINCLAIR@BHAM.AC.UK		UNIVERSITY HOSPITALS BIRMINGHAM NHS FOUNDATION TRUST;UNIVERSITY OF BIRMINGHAM;UNIVERSITY HOSPITALS BIRMINGHAM NHS FOUNDATION TRUST;UNIVERSITY OF BIRMINGHAM;UNIVERSITY OF BIRMINGHAM;CENTRE FOR ENDOCRINOLOGY DIABETES AND METABOLISM;UNIVERSITY OF BIRMINGHAM;GLOUCESTERSHIRE HOSPITALS NHS FOUNDATION TRUST;MANCHESTER UNIVERSITY NHS FOUNDATION TRUST;ROYAL HALLAMSHIRE HOSPITAL;ROYAL DEVON AND EXETER NHS …	MOLLAN S, 2021, JAMA NEUROL	https://www.scopus.com/inward/record.uri?eid=2-s2.0-85105175007&doi=10.1001%2fjamaneurol.2021.0659&partnerID=40&md5=a07828966f622a1a230dd0c334ae8b2b	SCOPUS
ADRENALIN; C REACTIVE PROTEIN; CORTICOTROPIN; CYTOKINE; DOPAMINE; GLUCOSE; HYDROCORTISONE; INSULIN; INTERLEUKIN 6; INTERLEUKIN 8; NORADRENALIN; TUMOR NECROSIS FACTOR ALPHA; ADULT; AGE; ARTICLE; BLOOD SAMPLING; BODY MASS; CALCULATION; CATABOLISM; CLINICAL ARTICLE; CLINICAL TRIAL; CONCENTRATION RESPONSE; CONTROLLED CLINICAL TRIAL; CONTROLLED STUDY; DISEASE ASSOCIATION; DOSE TIME EFFECT RELATION; FE…	ADRENALIN; C REACTIVE PROTEIN; CORTICOTROPIN; CYTOKINE; DOPAMINE; GLUCOSE; HYDROCORTISONE; INSULIN; INTERLEUKIN 6; INTERLEUKIN 8; NORADRENALIN; TUMOR NECROSIS FACTOR ALPHA; ADULT; AGE; ARTICLE; BLOOD SAMPLING; BODY MASS; CALCULATION; CATABOLISM; CLINICAL ARTICLE; CLINICAL TRIAL; CONCENTRATION RESPONSE; CONTROLLED CLINICAL TRIAL; CONTROLLED STUDY; DISEASE ASSOCIATION; DOSE TIME EFFECT RELATION; FE…	DEPARTMENT OF SURGERY, UNIVERSITY OF CALIFORNIA, DAVIS, MEDICAL CENTER, SACRAMENTO, CA, UNITED STATES; DEPARTMENT OF SURGERY, UCDMC, SACRAMENTO, CA 95817-1814, 2221 STOCKTON BLVD, UNITED STATES	BACKGROUND: THE MAGNITUDE OF THE SYSTEMIC STRESS RESPONSE IS PROPORTIONAL TO THE DEGREE OF OPERATIVE TRAUMA. WE HYPOTHESIZED THAT LAPAROSCOPIC GASTRIC BYPASS (GBP) IS ASSOCIATED WITH REDUCED OPERATIVE TRAUMA COMPARED WITH OPEN GBP, RESULTING IN A LOWER SYSTEMIC STRESS RESPONSE. STUDY DESIGN: FORTY-EIGHT PATIENTS WITH A BODY MASS INDEX OF 40 TO 60 WERE RANDOMLY ASSIGNED TO LAPAROSCOPIC (N = 26) OR…			10727515	J. AM. COLL. SURG.	JOURNAL OF THE AMERICAN COLLEGE OF SURGEONS	ENGLISH		557 – 566	AMERICAN COLLEGE OF SURGEONS		110	NGUYEN N;GOLDMAN C;HO H;GOSSELIN R;SINGH A;WOLFE B	10.4103/jmas.JMAS_117_21	SYSTEMIC STRESS RESPONSE AFTER LAPAROSCOPIC AND OPEN GASTRIC BYPASS	1	2002	NGUYEN NINH T;GOLDMAN CHARLES D;HO HUNG S;GOSSELIN ROBERT C;SINGH AMARDEEP;WOLFE BRUCE M			UNIVERSITY OF CALIFORNIA	NGUYEN N, 2002, J AM COLL SURG	https://www.scopus.com/inward/record.uri?eid=2-s2.0-0036257221&doi=10.1016%2fS1072-7515%2802%2901132-8&partnerID=40&md5=d154d1634d49ecf5cc8c7d9a48f224d2	SCOPUS
ABSORPTIOMETRY; PHOTON; ADULT; BONE DENSITY; BONE DISEASES; METABOLIC; CASE-CONTROL STUDIES; FEMALE; FOLLOW-UP STUDIES; GASTRIC BYPASS; HIP; HUMANS; LUMBAR VERTEBRAE; MALE; MIDDLE AGED; OBESITY; MORBID; RADIUS; TIBIA; WEIGHT LOSS; 25 HYDROXYVITAMIN D; CALCIUM; PARATHYROID HORMONE; ARTICLE; BONE STRENGTH; BONE STRUCTURE; CALCIUM BLOOD LEVEL; CLINICAL ARTICLE; CLINICAL TRIAL (TOPIC); COHORT ANALYSI…	ABSORPTIOMETRY; PHOTON; ADULT; BONE DENSITY; BONE DISEASES; METABOLIC; CASE-CONTROL STUDIES; FEMALE; FOLLOW-UP STUDIES; GASTRIC BYPASS; HIP; HUMANS; LUMBAR VERTEBRAE; MALE; MIDDLE AGED; OBESITY; MORBID; RADIUS; TIBIA; WEIGHT LOSS; 25 HYDROXYVITAMIN D; CALCIUM; PARATHYROID HORMONE; ADULT; ARTICLE; BONE DENSITY; BONE STRENGTH; BONE STRUCTURE; CALCIUM BLOOD LEVEL; CLINICAL ARTICLE; CLINICAL TRIAL (T…	ENDOCRINE UNIT, MASSACHUSETTS GENERAL HOSPITAL, 50 BLOSSOM STREET, THIER 1051, BOSTON, 02114, MA, UNITED STATES; WEIGHT CENTER, MASSACHUSETTS GENERAL HOSPITAL, BOSTON, 02114, MA, UNITED STATES	CONTEXT: BARIATRIC SURGERY IS INCREASINGLY POPULAR BUT MAY LEAD TO METABOLIC BONE DISEASE. OBJECTIVE: THE OBJECTIVE WAS TO DETERMINE THE RATE OF BONE LOSS IN THE 24 MONTHS AFTER ROUX-EN-Y GASTRIC BYPASS. DESIGN AND SETTING: THIS WAS A PROSPECTIVE COHORT STUDY CONDUCTED AT AN ACADEMIC MEDICAL CENTER. PARTICIPANTS: THE PARTICIPANTS WERE ADULTS WITH SEVERE OBESITY, INCLUDING 30 ADULTS UNDERGOING GAS…			0021972X	J. CLIN. ENDOCRINOL. METAB.	JOURNAL OF CLINICAL ENDOCRINOLOGY AND METABOLISM	ENGLISH		1452 – 1459	ENDOCRINE SOCIETY		109	ELAINE W;BOUXSEIN M;PUTMAN M;MONIS E;ROY A;PRATT J;BUTSCH W;FINKELSTEIN J	10.1016/j.soard.2009.01.009	TWOYEAR CHANGES IN BONE DENSITY AFTER ROUXENY GASTRIC BYPASS SURGERY	1	2015	ELAINE WYU;BOUXSEIN MARY L;PUTMAN MELISSA S;MONIS ELIZABETH L;ROY ADAM E;PRATT JANEY S A;BUTSCH W SCOTT;FINKELSTEIN JOEL S	W.YU. ELAINE; ENDOCRINE UNIT, MASSACHUSETTS GENERAL HOSPITAL, BOSTON, 50 BLOSSOM STREET, THIER 1051, 02114, UNITED STATES; EMAIL: EWYU@PARTNERS.ORG		MASSACHUSETTS GENERAL HOSPITAL;WEIGHT CENTER	ELAINE W, 2015, J CLIN ENDOCRINOL METAB	https://www.scopus.com/inward/record.uri?eid=2-s2.0-84927584359&doi=10.1210%2fjc.2014-4341&partnerID=40&md5=02fda42bf76e4ed5e963072de13a44ae	SCOPUS
BARIATRIC SURGERY; GASTRIC BYPASS; SLEEVE GASTRECTOMY; RANDOMIZED TRIAL; GHRELIN; GLUCOSE METABOLISM; WEIGHT-LOSS; SERUM GHRELIN; PEPTIDE; INSULIN; ADIPONECTIN; MULTICENTER; RECEPTOR; GLUCOSE	BARIATRIC SURGERY; WEIGHT-LOSS; SERUM GHRELIN; PEPTIDE; INSULIN; ADIPONECTIN; MULTICENTER; RECEPTOR; GLUCOSE	KALINOWSKI, P (CORRESPONDING AUTHOR), MED UNIV WARSAW, DEPT GEN TRANSPLANT \& LIVER SURG, BANACHA 1 A, PL-02097 WARSAW, POLAND.; KALINOWSKI, PIOTR; PALUSZKIEWICZ, RAFAL; WROBLEWSKI, TADEUSZ; REMISZEWSKI, PIOTR; GRODZICKI, MARIUSZ; KRAWCZYK, MAREK, MED UNIV WARSAW, DEPT GEN TRANSPLANT \& LIVER SURG, BANACHA 1 A, PL-02097 WARSAW, POLAND.; BARTOSZEWICZ, ZBIGNIEW, MED UNIV WARSAW, DEPT INTERNAL DIS \…	BACKGROUND: SLEEVE GASTRECTOMY (SG) AND ROUX-EN-Y GASTRIC BYPASS (RYGB) CAUSE WEIGHT LOSS AND METABOLIC IMPROVEMENT, BUT RESULTS OF PUBLISHED STUDIES ARE CONTRADICTORY. OBJECTIVES: THE AIM OF THIS STUDY WAS TO COMPARE THE EFFECTS OF SG AND RYGB ON GHRELIN, LEPTIN, AND GLUCOSE HOMEOSTASIS IN A RANDOMIZED CONTROLLED TRIAL. SETTING: UNIVERSITY HOSPITAL, POLAND. METHODS: SEVENTY-TWO MORBIDLY OBESE PA…	STE 800, 230 PARK AVE, NEW YORK, NY 10169 USA	MEDICAL UNIVERSITY OF WARSAW; MEDICAL UNIVERSITY OF WARSAW	1550-7289	SURG. OBES. RELAT. DIS.	SURGERY FOR OBESITY AND RELATED DISEASES	ENGLISH	KALINOWSKI, PIOTR/0000-0001-5363-6801 GRODZICKI, MARIUSZ/0000-0003-4237-7757 WROBLEWSKI, TADEUSZ/0000-0001-5547-2927 REMISZEWSKI, PIOTR/0000-0002-4910-0198 PALUSZKIEWICZ, RAFAL/0000-0001-5877-1543	181-188	ELSEVIER SCIENCE INC	SURGERY	109	KALINOWSKI P;PALUSZKIEWICZ R;WROBLEWSKI T;REMISZEWSKI P;GRODZICKI M;BARTOSZEWICZ Z;KRAWCZYK M	10.1016/j.soard.2016.08.025	GHRELIN LEPTIN AND GLYCEMIC CONTROL AFTER SLEEVE GASTRECTOMY VERSUS ROUXENY GASTRIC BYPASSRESULTS OF A RANDOMIZED CLINICAL TRIAL	2	2017	KALINOWSKI PIOTR;PALUSZKIEWICZ RAFAL;WROBLEWSKI TADEUSZ; REMISZEWSKI PIOTR;GRODZICKI MARIUSZ;BARTOSZEWICZ ZBIGNIEW; KRAWCZYK MAREK	KALINOWSKI, P (CORRESPONDING AUTHOR), MED UNIV WARSAW, DEPT GEN TRANSPLANT \& LIVER SURG, BANACHA 1 A, PL-02097 WARSAW, POLAND	Bariatric surgery; Gastric bypass; Sleeve gastrectomy; Randomized trial; Ghrelin; Glucose metabolism	MED UNIV WARSAW;MED UNIV WARSAW;MED UNIV WARSAW	KALINOWSKI P, 2017, SURG OBES RELAT DIS		ISI
COHORT TRIAL; GASTRIC BYPASS SURGERY; HEALTH-RELATED QUALITY OF LIFE; HRQOL; IMPACT OF WEIGHT ON QUALITY OF LIFE-LITE; IWQOL-LITE; MEDICAL OUTCOMES STUDY 36-ITEM SHORT-FORM HEALTH SURVEY; SF-36; FEMALE; FOLLOW-UP STUDIES; GASTRIC BYPASS; HEALTH STATUS; HUMANS; MALE; MIDDLE AGED; OBESITY; MORBID; PROSPECTIVE STUDIES; QUALITY OF LIFE; QUESTIONNAIRES; SEVERITY OF ILLNESS INDEX; TIME FACTORS; TREATME…	FEMALE; FOLLOW-UP STUDIES; GASTRIC BYPASS; HEALTH STATUS; HUMANS; MALE; MIDDLE AGED; OBESITY; MORBID; PROSPECTIVE STUDIES; QUALITY OF LIFE; QUESTIONNAIRES; SEVERITY OF ILLNESS INDEX; TIME FACTORS; TREATMENT OUTCOME; WEIGHT LOSS; ADULT; ARTICLE; CLINICAL TRIAL; CONTROLLED CLINICAL TRIAL; CONTROLLED STUDY; DISEASE SEVERITY; FEMALE; HEALTH STATUS; HUMAN; MAJOR CLINICAL STUDY; MALE; OBESITY; OUTCOME …	OBESITY AND QUALITY, LIFE CONSULTING, DURHAM, NC, UNITED STATES; DEPARTMENT OF COMMUNITY AND FAMILY MEDICINE, DUKE UNIVERSITY MEDICAL CENTER, DURHAM, NC, UNITED STATES; NEUROPSYCHIATRIC RESEARCH INSTITUTE, FARGO, ND, UNITED STATES; DEPARTMENT OF NEUROSCIENCE, UNIVERSITY OF NORTH DAKOTA SCHOOL OF MEDICINE, FARGO, ND, UNITED STATES; CARDIOVASCULAR GENETICS DIVISION, UNIVERSITY OF UTAH SCHOOL OF MED…	BACKGROUND: FEW WEIGHT LOSS SURGERY TRIALS HAVE EVALUATED THE CHANGES IN HEALTH-RELATED QUALITY OF LIFE (HRQOL) RELATIVE TO OBESE INDIVIDUALS NOT PARTICIPATING IN WEIGHT LOSS INTERVENTIONS. IN A PROSPECTIVE STUDY AT A BARIATRIC SURGERY PRACTICE, WE EVALUATED THE 2-YEAR CHANGES IN HRQOL IN GASTRIC BYPASS PATIENTS COMPARED WITH 2 SEVERELY OBESE GROUPS WHO DID NOT UNDERGO SURGICAL WEIGHT LOSS. METHO…			15507289	SURG. OBES. RELAT. DIS.	SURGERY FOR OBESITY AND RELATED DISEASES	ENGLISH		250 – 256			108	KOLOTKIN R;CROSBY R;GRESS R;HUNT S;ADAMS T	10.1007/s40618-022-01811-9	TWOYEAR CHANGES IN HEALTHRELATED QUALITY OF LIFE IN GASTRIC BYPASS PATIENTS COMPARED WITH SEVERELY OBESE CONTROLS	1	2009	KOLOTKIN RONETTE L;CROSBY ROSS D;GRESS RICHARD E;HUNT STEVEN C;ADAMS TED D		Cohort trial; Gastric bypass surgery; Health-related quality of life; HRQOL; Impact of Weight on Quality of Life-Lite; IWQOL-Lite; Medical Outcomes Study 36-item Short-Form Health Survey; SF-36	DUKE UNIVERSITY MEDICAL CENTER;NEUROPSYCHIATRIC RESEARCH INSTITUTE;UNIVERSITY OF NORTH DAKOTA SCHOOL OF MEDICINE;UNIVERSITY OF UTAH SCHOOL OF MEDICINE	KOLOTKIN R, 2009, SURG OBES RELAT DIS	https://www.scopus.com/inward/record.uri?eid=2-s2.0-62549094873&doi=10.1016%2fj.soard.2009.01.009&partnerID=40&md5=e0a11c2c345e89015b3d4ff6de6bdf8b	SCOPUS
BARIATRIC SURGERY; GASTRIC BYPASS; LAPAROSCOPY; OBESITY; SLEEVE GASTRECTOMY; ADULT; FEMALE; GASTRECTOMY; HUMANS; MALE; MIDDLE AGED; MORBID; PROSPECTIVE STUDIES; YOUNG ADULT; STOMACH SECRETION INHIBITOR; ANASTOMOSIS STENOSIS; ARTICLE; BLOOD TRANSFUSION; BODY MASS; COMORBIDITY; CONTROLLED CLINICAL TRIAL; ENDOSCOPIC THERAPY; HEMORRHAGIC GASTRITIS; HERNIA; HUMAN; HYPERSALIVATION; HYPOTENSION; INTERME…	ADULT; FEMALE; GASTRECTOMY; GASTRIC BYPASS; HUMANS; LAPAROSCOPY; MALE; MIDDLE AGED; OBESITY; MORBID; PROSPECTIVE STUDIES; YOUNG ADULT; STOMACH SECRETION INHIBITOR; ADULT; ANASTOMOSIS STENOSIS; ARTICLE; BLOOD TRANSFUSION; BODY MASS; COMORBIDITY; CONTROLLED CLINICAL TRIAL; ENDOSCOPIC THERAPY; FEMALE; GASTRECTOMY; HEMORRHAGIC GASTRITIS; HERNIA; HUMAN; HYPERSALIVATION; HYPOTENSION; INTERMETHOD COMPAR…	DEPARTMENT OF SURGERY, UNIVERSIDAD CENTRAL DE VENEZUELA, HOSPITAL UNIVERSITARIO DE CARACAS, CARACAS, VENEZUELA	LAPAROSCOPIC ROUX-EN-Y GASTRIC BYPASS (LRYGB) IS ONE OF THE MOST WIDELY USED BARIATRIC PROCEDURES TODAY, AND LAPAROSCOPIC SLEEVE GASTRECTOMY (LSG) AS A SINGLE-STAGE PROCEDURE FOR THE TREATMENT OF MORBID OBESITY IS BECOMING INCREASINGLY POPULAR. IN THIS STUDY, WE PROSPECTIVELY COMPARED BOTH TECHNIQUES IN ORDER TO ESTABLISH WHETHER THERE IS ANY SUPERIORITY OF ONE OVER THE OTHER BASED ON MORBIDITY A…			09608923	OBES. SURG.	OBESITY SURGERY	ENGLISH		212 – 216			108	LEYBA J;AULESTIA S;LLOPIS S	10.1007/s11695-010-0279-8	LAPAROSCOPIC ROUXENY GASTRIC BYPASS VERSUS LAPAROSCOPIC SLEEVE GASTRECTOMY FOR THE TREATMENT OF MORBID OBESITY A PROSPECTIVE STUDY OF 117 PATIENTS	2	2011	LEYBA JOSE LUIS;AULESTIA SALVADOR NAVARRETE;LLOPIS SALVADOR NAVARRETE	J. L. LEYBA; LAS AMÉRICAS CON CALLE REPÚBLICA., URB. TERRAZAS DEL CLUB HÍPICO, CARACAS 1080, TORRE MÉDICA TERRAS PLAZA. PISO 10, VENEZUELA; EMAIL: JLLEYBA@YAHOO.ES	Bariatric surgery; Gastric bypass; Laparoscopy; Obesity; Sleeve gastrectomy	UNIVERSIDAD CENTRAL DE VENEZUELA	LEYBA J, 2011, OBES SURG	https://www.scopus.com/inward/record.uri?eid=2-s2.0-79951700731&doi=10.1007%2fs11695-010-0279-8&partnerID=40&md5=7a468fdec9330c4756a82bb6128a75bd	SCOPUS
ENDOGENOUS GLUCOSE PRODUCTION; GASTRIC BYPASS; GASTROINTESTINAL HORMONE RESPONSE; GLUCAGON-LIKE PEPTIDE-1; GLUCOSE KINETICS; INSULIN SENSITIVITY; OBESITY; POSTPRANDIAL ABSORPTION; RATE OF APPEARANCE; RATE OF DISAPPEARANCE; ABSORPTIOMETRY; PHOTON; BODY MASS INDEX; FEMALE; GLUCOSE; HUMANS; MALE; GLUCAGON; GLUCAGON LIKE PEPTIDE 1; INSULIN; ARTICLE; CLINICAL ARTICLE; CLINICAL TRIAL; GLUCAGON RELEASE;…	ABSORPTIOMETRY; PHOTON; BODY MASS INDEX; FEMALE; GASTRIC BYPASS; GLUCOSE; HUMANS; MALE; GLUCAGON; GLUCAGON LIKE PEPTIDE 1; GLUCOSE; INSULIN; ARTICLE; CLINICAL ARTICLE; CLINICAL TRIAL; FEMALE; GLUCAGON RELEASE; GLUCONEOGENESIS; GLUCOSE ABSORPTION; GLUCOSE BLOOD LEVEL; GLUCOSE METABOLISM; GLUCOSE TOLERANCE; HORMONE RESPONSE; HUMAN; INSULIN RELEASE; LIPOLYSIS; MALE; OBESITY; PRIORITY JOURNAL; ROUX Y…	DEPARTMENT OF ENDOCRINOLOGY 541, HVIDOVRE HOSPITAL, 2650 HVIDOVRE, KETTEGAARD ALLÉ 30, DENMARK; NOVO NORDISK FOUNDATION CENTRE FOR BASIC METABOLIC RESEARCH, PANUM INSTITUTE, UNIVERSITY OF COPENHAGEN, COPENHAGEN, DENMARK; DEPARTMENT OF BIOMEDICAL SCIENCES, FACULTY OF HEALTH SCIENCES, UNIVERSITY OF COPENHAGEN, COPENHAGEN, DENMARK; DIABETES AND OBESITY BIOLOGY, NOVO NORDISK, MÅLØV, DENMARK; DEPARTME…	AIMS/HYPOTHESIS: ROUX-EN-Y GASTRIC BYPASS SURGERY (RYGB) IMPROVES GLUCOSE TOLERANCE IN PATIENTS WITH TYPE 2 DIABETES, BUT ALSO CHANGES THE GLUCOSE PROFILE IN RESPONSE TO A MEAL IN GLUCOSE-TOLERANT INDIVIDUALS. WE HYPOTHESISED THAT THE DRIVING FORCE FOR THE CHANGED POSTPRANDIAL GLUCOSE PROFILES AFTER RYGB IS RAPID ENTRY OF GLUCOSE INTO THE SYSTEMIC CIRCULATION DUE TO MODIFIED GASTROINTESTINAL ANAT…			14320428	DIABETOLOGIA	DIABETOLOGIA	ENGLISH		2250 – 2254			108	JACOBSEN S;BOJSEN-MØLLER K;DIRKSEN C;JØRGENSEN N;CLAUSEN T;WULFF B;KRISTIANSEN V;WORM D;HANSEN D;HOLST J;VAN H G;MADSBAD S	10.1007/s00125-013-3003-0	EFFECTS OF GASTRIC BYPASS SURGERY ON GLUCOSE ABSORPTION AND METABOLISM DURING A MIXED MEAL IN GLUCOSETOLERANT INDIVIDUALS	1	2013	JACOBSEN SIV H;BOJSEN-MØLLER KIRSTINE N;DIRKSEN CARSTEN;JØRGENSEN NILS B;CLAUSEN TRINE R;WULFF BIRGITTE S;KRISTIANSEN VIGGO B;WORM DORTE;HANSEN DORTE L;HOLST JENS J;VAN HALL GERRIT;MADSBAD STEN	S.H. JACOBSEN; DEPARTMENT OF ENDOCRINOLOGY 541, HVIDOVRE HOSPITAL, 2650 HVIDOVRE, KETTEGAARD ALLÉ 30, DENMARK; EMAIL: SIV.HESSE@HOTMAIL.COM	Endogenous glucose production; Gastric bypass; Gastrointestinal hormone response; Glucagon-like peptide-1; Glucose kinetics; Insulin sensitivity; Obesity; Postprandial absorption; Rate of appearance; Rate of disappearance	DENMARK;UNIVERSITY OF COPENHAGEN;UNIVERSITY OF COPENHAGEN;HVIDOVRE HOSPITAL;RIGSHOSPITALET	JACOBSEN S, 2013, DIABETOLOGIA	https://www.scopus.com/inward/record.uri?eid=2-s2.0-84890126414&doi=10.1007%2fs00125-013-3003-0&partnerID=40&md5=30182932b4a1dd074f18d525183f536e	SCOPUS
BARIATRIC SURGERY; COHORT STUDY; DIABETES; LABS; PREDICTORS; WEIGHT CHANGE; ADULT; BODY MASS INDEX; COHORT STUDIES; FEMALE; FOLLOW-UP STUDIES; HUMANS; LAPAROSCOPY; LINEAR MODELS; LONGITUDINAL STUDIES; MALE; MIDDLE AGED; MULTIVARIATE ANALYSIS; OBESITY; MORBID; PREDICTIVE VALUE OF TESTS; PREOPERATIVE CARE; RETROSPECTIVE STUDIES; TIME FACTORS; TREATMENT OUTCOME; UNITED STATES; WEIGHT GAIN; WEIGHT LO…	ADULT; BARIATRIC SURGERY; BODY MASS INDEX; COHORT STUDIES; FEMALE; FOLLOW-UP STUDIES; HUMANS; LAPAROSCOPY; LINEAR MODELS; LONGITUDINAL STUDIES; MALE; MIDDLE AGED; MULTIVARIATE ANALYSIS; OBESITY; MORBID; PREDICTIVE VALUE OF TESTS; PREOPERATIVE CARE; RETROSPECTIVE STUDIES; TIME FACTORS; TREATMENT OUTCOME; UNITED STATES; WEIGHT GAIN; WEIGHT LOSS; ADULT; ALCOHOL CONSUMPTION; ARTICLE; BARIATRIC SURGER…	DEPARTMENT OF SURGERY, UNIVERSITY OF PITTSBURGH MEDICAL CENTER, 3380 BOULEVARD OF THE ALLIES, PITTSBURGH, 15213, PA, UNITED STATES; DEPARTMENT OF EPIDEMIOLOGY, UNIVERSITY OF PITTSBURGH, GRADUATE SCHOOL OF PUBLIC HEALTH, PITTSBURGH, PA, UNITED STATES; DEPARTMENT OF SURGERY, UNIVERSITY OF MICHIGAN, ANN ARBOR, MI, UNITED STATES; DEPARTMENT OF SURGERY, WEILL CORNELL MEDICAL COLLEGE, NEW YORK, NY, UNI…	BACKGROUND LIMITED DATA GUIDE THE PREDICTION OF WEIGHT LOSS SUCCESS OR FAILURE AFTER BARIATRIC SURGERY ACCORDING TO PRESURGERY FACTORS. THERE IS SIGNIFICANT VARIATION IN WEIGHT CHANGE AFTER BARIATRIC SURGERY AND MUCH INTEREST IN IDENTIFYING PREOPERATIVE FACTORS THAT MAY CONTRIBUTE TO THESE DIFFERENCES. THIS REPORT EVALUATES THE ASSOCIATIONS OF A COMPREHENSIVE SET OF BASELINE FACTORS AND 3-YEAR WE…			15507289	SURG. OBES. RELAT. DIS.	SURGERY FOR OBESITY AND RELATED DISEASES	ENGLISH		1109 – 1118	ELSEVIER INC.		108	COURCOULAS A;CHRISTIAN N;O'ROURKE R;DAKIN G;PATCHEN D E;FLUM D;MELISSA K P;MITCHELL J;PATTERSON E;POMP A;PORIES W;SPANIOLAS K;STEFFEN K;WOLFE B;BELLE S	10.1016/j.soard.2015.01.011	PREOPERATIVE FACTORS AND 3YEAR WEIGHT CHANGE IN THE LONGITUDINAL ASSESSMENT OF BARIATRIC SURGERY (LABS) CONSORTIUM	1	2015	COURCOULAS ANITA P;CHRISTIAN NICHOLAS J;O'ROURKE ROBERT W;DAKIN GREG;PATCHEN DELLINGER E;FLUM DAVID R;MELISSA KALARCHIAN PHD;MITCHELL JAMES E;PATTERSON EMMA;POMP ALFONS;PORIES WALTER J;SPANIOLAS KONSTANTINOS;STEFFEN KRISTINE;WOLFE BRUCE M;BELLE STEVEN H	A.P. COURCOULAS; DEPARTMENT OF SURGERY, UNIVERSITY OF PITTSBURGH MEDICAL CENTER, PITTSBURGH, 3380 BOULEVARD OF THE ALLIES, 15213, UNITED STATES; EMAIL: COURCOULASAP@UPMC.EDU	Bariatric surgery; Cohort study; Diabetes; LABS; Predictors; Weight change	UNIVERSITY OF PITTSBURGH MEDICAL CENTER;UNIVERSITY OF PITTSBURGH;UNIVERSITY OF MICHIGAN;WEILL CORNELL MEDICAL COLLEGE;UNIVERSITY OF WASHINGTON;DUQUESNE UNIVERSITY;NEUROPSYCHIATRIC RESEARCH INSTITUTE;LEGACY GOOD SAMARITAN HOSPITAL;EAST CAROLINA UNIVERSITY;NORTH DAKOTA STATE UNIVERSITY	COURCOULAS A, 2015, SURG OBES RELAT DIS	https://www.scopus.com/inward/record.uri?eid=2-s2.0-84948580977&doi=10.1016%2fj.soard.2015.01.011&partnerID=40&md5=38751e8064813243aff61b1a22bf5243	SCOPUS
LAPAROSCOPIC ROUX-EN-Y GASTRIC BYPASS; BARIATRIC SURGERY; SURGICAL; TECHNIQUES; SLEEVE GASTRECTOMY; WEIGHT-LOSS; OBESITY; CLOSURE; DEFECTS	SLEEVE GASTRECTOMY; WEIGHT-LOSS; OBESITY; CLOSURE; DEFECTS	DANG, JT (CORRESPONDING AUTHOR), UNIV ALBERTA, UNIV ALBERTA HOSP, FAC MED \& DENT, DEPT SURG,DIV GEN SURG, 8440 112 ST NW, EDMONTON, AB T6G 2B7, CANADA.; DANG, JERRY T.; DEPRATO, ANDY; VERHOEFF, KEVIN; SUN, WARREN; MOCANU, VALENTIN; KARMALI, SHAHZEER; SWITZER, NOAH J., UNIV ALBERTA, UNIV ALBERTA HOSP, FAC MED \& DENT, DEPT SURG,DIV GEN SURG, 8440 112 ST NW, EDMONTON, AB T6G 2B7, CANADA.; PANDEY, …	INTRODUCTION SURGICAL TECHNIQUE VARIES DRAMATICALLY IN THE PERFORMANCE OF LAPAROSCOPIC ROUX-EN-Y GASTRIC BYPASS (LRYGB) AND THESE DIFFERENCES CAN POTENTIALLY LEAD TO VARIATION IN OUTCOMES. THE OBJECTIVE OF THIS STUDY WAS TO CHARACTERIZE SURGICAL TECHNIQUES USED DURING LRYGB. METHODS AN ANONYMOUS 44- QUESTION SURVEY WAS DISTRIBUTED BY EMAIL TO ALL BARIATRIC SURGEONS WITH MEMBERSHIP IN THE ASMBS, S…	ONE NEW YORK PLAZA, SUITE 4600, NEW YORK, NY, UNITED STATES	UNIVERSITY OF ALBERTA; UNIVERSITY OF CALGARY; ROYAL ALEXANDRA HOSPITAL; UNIVERSITY OF CALIFORNIA SYSTEM; UNIVERSITY OF CALIFORNIA IRVINE	0960-8923	OBES. SURG.	OBESITY SURGERY	ENGLISH	KARMALI, SHAHZEER/0000-0002-5083-7912 DEPRATO, ANDY/0000-0001-8519-3881	2357-2365	SPRINGER	SURGERY	108	DANG J;DEPRATO A;VERHOEFF K;SUN W;PANDEY A;MOCANU V;KARMALI S;SWITZER ;NOAH J N;NGUYEN N	10.3945/AJCN.111.013771	VARIATION OF LAPAROSCOPIC ROUXENY GASTRIC BYPASS TECHNIQUES: A SURVEY OF 518 BARIATRIC SURGEONS	1	2022	DANG JERRY T;DEPRATO ANDY;VERHOEFF KEVIN;SUN WARREN; PANDEY ARMAAN;MOCANU VALENTIN;KARMALI SHAHZEER;SWITZER; NOAH J;NGUYEN NINH T	DANG, JT (CORRESPONDING AUTHOR), UNIV ALBERTA, UNIV ALBERTA HOSP, FAC MED \& DENT, DEPT SURG,DIV GEN SURG, 8440 112 ST NW, EDMONTON, AB T6G 2B7, CANADA	Laparoscopic Roux-en-Y gastric bypass; Bariatric surgery; Surgical; techniques	UNIV ALBERTA;UNIV ALBERTA;UNIV CALGARY;CTR ADVANCEMENT SURG EDUC AND SIMULAT;UNIV CALIF IRVINE	DANG J, 2022, OBES SURG		ISI
ADULT; AGED; BLOOD GLUCOSE/METABOLISM; DIABETES MELLITUS, TYPE 2/BLOOD/COMPLICATIONS; FEMALE; GASTRIC BYPASS; GLUCAGON/BLOOD; GLUCAGON-LIKE PEPTIDE 1/BLOOD; HUMANS; INSULIN/BLOOD; INSULIN RESISTANCE; MALE; MIDDLE AGED; OBESITY/BLOOD/COMPLICATIONS/SURGERY; PROSPECTIVE STUDIES; TREATMENT OUTCOME; WEIGHT LOSS	ADULT;AGED;BLOOD GLUCOSE/METABOLISM;DIABETES MELLITUS, TYPE 2/BLOOD/COMPLICATIONS;FEMALE;GASTRIC BYPASS;GLUCAGON/BLOOD;GLUCAGON-LIKE PEPTIDE 1/BLOOD;HUMANS;INSULIN/BLOOD;INSULIN RESISTANCE;MALE;MIDDLE AGED;OBESITY/BLOOD/COMPLICATIONS/SURGERY;PROSPECTIVE STUDIES;TREATMENT OUTCOME;WEIGHT LOSS	DEPARTMENT OF MEDICINE, DIVISION OF ENDOCRINOLOGY, UNIVERSIDADE FEDERAL DE SÃO PAULO, RUA LEANDRO DUPRET 365, CEP 04025011, VILA CLEMENTINO, SÃO PAULO, BRAZIL.; LU.;UMEDA@TERRA.;COM.;BR	BACKGROUND: THE SURGICAL TREATMENT OF OBESITY AMELIORATES METABOLIC ABNORMALITIES IN PATIENTS WITH TYPE 2 DIABETES. THE OBJECTIVE OF THIS STUDY WAS TO EVALUATE THE EARLY EFFECTS OF ROUX-EN-Y GASTRIC BYPASS (RYGB) ON METABOLIC AND HORMONAL PARAMETERS IN PATIENTS WITH TYPE 2 DIABETES (T2DM). METHODS: TEN PATIENTS WITH T2DM (BMI, 39.7 ± 1.9) WERE EVALUATED BEFORE AND 7, 30, AND 90 DAYS AFTER RYGB. A…			1708-0428 (ELECTRONIC) 0960-8923 (LINKING)		OBESITY SURGERY	ENG		896-901			107	UMEDA L;SILVA E;CARNEIRO G;ARASAKI C;GELONEZE B;ZANELLA M	10.1007/S11695-011-0412-3	EARLY IMPROVEMENT IN GLYCEMIC CONTROL AFTER BARIATRIC SURGERY AND ITS RELATIONSHIPS WITH INSULIN GLP1 AND GLUCAGON SECRETION IN TYPE 2 DIABETIC PATIENTS	1	2011	UMEDA, LUCIANA MELA;SILVA, ELIANA A;CARNEIRO, GLAUCIA;ARASAKI, CARLOS H;GELONEZE, BRUNO;ZANELLA, MARIA TERESA		Adult;Aged;Blood Glucose/metabolism;Diabetes Mellitus, Type 2/blood/complications;Female;Gastric Bypass;Glucagon/blood;Glucagon-Like Peptide 1/blood;Humans;Insulin/blood;Insulin Resistance;Male;Middle Aged;Obesity/blood/complications/surgery;Prospective Studies;Treatment Outcome;Weight Loss	UNIVERSIDADE FEDERAL DE SÃO PAULO	UMEDA L, 2011, OBES SURG		PUBMED
MORBIDLY OBESE; MESH; COMPLICATIONS; RISK	MORBIDLY OBESE; MESH; COMPLICATIONS; RISK	STRZELCZYK, JM (CORRESPONDING AUTHOR), BARLICKI HOSP, DEPT GEN \& TRANSPLANT SURG, KOPCINSKIEGO 22, PL-90153 LODZ, POLAND.; MED UNIV LODZ, BARLICKI UNIV HOSP, DEPT GEN \& TRANSPLANT SURG, LODZ, POLAND.; MED UNIV LODZ, BARLICKI UNIV HOSP, DEPT ANESTHESIOL \& INTENS CARE, LODZ, POLAND.; MED UNIV LODZ, BARLICKI UNIV HOSP, DEPT METAB DISORDERS, LODZ, POLAND.	BACKGROUND: POSTOPERATIVE HERNIA FOLLOWING BARIATRIC PROCEDURES IS MORE COMMON THAN IN OTHER GROUPS OF SURGICAL PATIENTS, AND REMAINS A SERIOUS PROBLEM. GASTRIC BYPASS IS THE MOST OFTEN PERFORMED BARIATRIC PROCEDURE AND, DESPITE THE INCREASING POPULARITY OF A LAPAROSCOPIC APPROACH, MANY MORBIDLY OBESE PATIENTS ARE STILL OFFERED OPEN PROCEDURES. THE AIM OF THIS STUDY WAS TO ASSESS THE EFFECTS OF P…	111 RIVER ST, HOBOKEN 07030-5774, NJ USA	MEDICAL UNIVERSITY LODZ; MEDICAL UNIVERSITY LODZ; MEDICAL UNIVERSITY LODZ	0007-1323	BR. J. SURG.	BRITISH JOURNAL OF SURGERY	ENGLISH	STRZELCZYK, JANUSZ/0000-0003-3438-9512	1347-1350	WILEY	SURGERY	105	STRZELCZYK J;SZYMANSKI D;NOWICKI M;WILCZYNSKI ;W. W;GASZYNSKI T;CZUPRYNIAK L	10.1002/bjs.5512	RANDOMIZED CLINICAL TRIAL OF POSTOPERATIVE HERNIA PROPHYLAXIS IN OPEN BARIATRIC SURGERY	1	2006	STRZELCZYK J M;SZYMANSKI D;NOWICKI M E;WILCZYNSKI; W;GASZYNSKI T;CZUPRYNIAK L	STRZELCZYK, JM (CORRESPONDING AUTHOR), BARLICKI HOSP, DEPT GEN \& TRANSPLANT SURG, KOPCINSKIEGO 22, PL-90153 LODZ, POLAND		BARLICKI HOSP;MED UNIV LODZ;MED UNIV LODZ;MED UNIV LODZ	STRZELCZYK J, 2006, BR J SURG		ISI
ADULT; BODY MASS INDEX; DIABETES MELLITUS; TYPE 2; FEMALE; GASTRIC BYPASS; GLUCOSE TOLERANCE TEST; HUMANS; HYPERINSULINISM; INSULIN; INSULIN RESISTANCE; MIDDLE AGED; OBESITY; MORBID; REMISSION INDUCTION; GLUCOSE; ARTICLE; BODY MASS; CLINICAL ARTICLE; CONTROLLED CLINICAL TRIAL; CONTROLLED STUDY; CROSS-SECTIONAL STUDY; DIET RESTRICTION; DISEASE SEVERITY; GLUCOSE BLOOD LEVEL; HUMAN; HYPERINSULINEMIA…	ADULT; BODY MASS INDEX; DIABETES MELLITUS; TYPE 2; FEMALE; GASTRIC BYPASS; GLUCOSE TOLERANCE TEST; HUMANS; HYPERINSULINISM; INSULIN; INSULIN RESISTANCE; MIDDLE AGED; OBESITY; MORBID; REMISSION INDUCTION; GLUCOSE; INSULIN; ADULT; ARTICLE; BODY MASS; CLINICAL ARTICLE; CONTROLLED CLINICAL TRIAL; CONTROLLED STUDY; CROSS-SECTIONAL STUDY; DIET RESTRICTION; DISEASE SEVERITY; FEMALE; GLUCOSE BLOOD LEVEL;…	DEPARTMENT OF EXERCISE AND SPORT SCIENCE, EAST CAROLINA UNIVERSITY, GREENVILLE, NC 27834, UNITED STATES; DEPARTMENT OF SURGERY, EAST CAROLINA UNIVERSITY, GREENVILLE, NC 27834, UNITED STATES; DEPARTMENT OF INTERNAL MEDICINE, EAST CAROLINA UNIVERSITY, GREENVILLE, NC 27834, UNITED STATES; DEPARTMENT OF PHYSIOLOGY, BRODY MEDICAL SCHOOL, EAST CAROLINA UNIVERSITY, GREENVILLE, NC 27834, 600 MOYE BOULEVA…	CONTEXT: ROUX-EN-Y GASTRIC BYPASS (RYGB) HAS BEEN SHOWN TO INDUCE RAPID AND DURABLE REVERSAL OF TYPE 2 DIABETES. OBJECTIVE: THE AIM OF THE STUDY WAS TO INVESTIGATE A POSSIBLE MECHANISM FOR THE REMISSION OF TYPE 2 DIABETES AFTER RYGB. DESIGN: A CROSS-SECTIONAL, NONRANDOMIZED, CONTROLLED STUDY WAS CONDUCTED. SURGERY PATIENTS WERE STUDIED BEFORE RYGB AND 1 WK AND 3 MONTHS AFTER SURGERY. SETTING: THI…			19457197	J. CLIN. ENDOCRINOL. METAB.	JOURNAL OF CLINICAL ENDOCRINOLOGY AND METABOLISM	ENGLISH		2525 – 2531			105	REED M;PORIES W;CHAPMAN W;PENDER J;BOWDEN R;BARAKAT H;GAVIN T;GREEN T;TAPSCOTT E;ZHENG D;SHANKLEY N;YIEH L;POLIDORI D;PICCOLI S;BRENNER-GATI L;DOHM G	10.1210/jc.2011-0165	ROUXENY GASTRIC BYPASS CORRECTS HYPERINSULINEMIA IMPLICATIONS FOR THE REMISSION OF TYPE 2 DIABETES	1	2011	REED MELISSA A;PORIES WALTER J;CHAPMAN WILLIAM;PENDER JOHN;BOWDEN RITA;BARAKAT HISHAM;GAVIN TIMOTHY P;GREEN TOM;TAPSCOTT ED;ZHENG DONGHAI;SHANKLEY NIGEL;YIEH LYNN;POLIDORI DAVID;PICCOLI STEVEN P;BRENNER-GATI LEONA;DOHM G LYNIS	G.L. DOHM; DEPARTMENT OF PHYSIOLOGY, BRODY MEDICAL SCHOOL, EAST CAROLINA UNIVERSITY, GREENVILLE, NC 27834, 600 MOYE BOULEVARD, UNITED STATES; EMAIL: DOHMG@ECU.EDU		EAST CAROLINA UNIVERSITY;EAST CAROLINA UNIVERSITY;EAST CAROLINA UNIVERSITY;EAST CAROLINA UNIVERSITY;JOHNSON AND JOHNSON PHARMACEUTICAL RESEARCH AND DEVELOPMENT;JOHNSON AND JOHNSON PHARMACEUTICAL RESEARCH AND DEVELOPMENT	REED M, 2011, J CLIN ENDOCRINOL METAB	https://www.scopus.com/inward/record.uri?eid=2-s2.0-79961238549&doi=10.1210%2fjc.2011-0165&partnerID=40&md5=9b8e84883d1d7f6fff26fffbb2c5b4ca	SCOPUS
ADULT; BLOOD GLUCOSE; DIABETES MELLITUS; TYPE 2; FEMALE; GASTRIC BYPASS; GLUCOSE CLAMP TECHNIQUE; HUMANS; INSULIN RESISTANCE; LIVER; MALE; MIDDLE AGED; OBESITY; OMENTUM; REMISSION INDUCTION; TREATMENT OUTCOME; WEIGHT LOSS; ARTICLE; BODY MASS; CONTROLLED STUDY; GLUCONEOGENESIS; HUMAN; INSULIN SENSITIVITY; MAJOR CLINICAL STUDY; NON INSULIN DEPENDENT DIABETES MELLITUS; OMENTECTOMY; POSTOPERATIVE PER…	ADULT; BLOOD GLUCOSE; DIABETES MELLITUS; TYPE 2; FEMALE; GASTRIC BYPASS; GLUCOSE CLAMP TECHNIQUE; HUMANS; INSULIN RESISTANCE; LIVER; MALE; MIDDLE AGED; OBESITY; OMENTUM; REMISSION INDUCTION; TREATMENT OUTCOME; WEIGHT LOSS; ADULT; ARTICLE; BODY MASS; CONTROLLED STUDY; FEMALE; GLUCONEOGENESIS; HUMAN; INSULIN SENSITIVITY; LIVER; MAJOR CLINICAL STUDY; MALE; NON INSULIN DEPENDENT DIABETES MELLITUS; OB…	DEPARTMENT OF MEDICINE, VANDERBILT UNIVERSITY SCHOOL OF MEDICINE, NASHVILLE, TN, UNITED STATES; DEPARTMENT OF SURGERY, VANDERBILT UNIVERSITY SCHOOL OF MEDICINE, NASHVILLE, TN, UNITED STATES; DEPARTMENT OF BIOSTATISTICS, VANDERBILT UNIVERSITY SCHOOL OF MEDICINE, NASHVILLE, TN, UNITED STATES	OBJECTIVE - EARLY AFTER ROUX-EN-Y GASTRIC BYPASS (RYGB), THERE IS IMPROVEMENT IN TYPE 2 DIABETES, WHICH IS CHARACTERIZED BY INSULIN RESISTANCE. WE DETERMINED THE ACUTE EFFECTS OF RYGB, WITH AND WITHOUT OMENTECTOMY, ON HEPATIC AND PERIPHERAL INSULIN SENSITIVITY. WE ALSO INVESTIGATED WHETHER PREOPERATIVE DIABETES OR POSTOPERATIVE DIABETES REMISSION INFLUENCED TISSUESPECIFIC INSULIN SENSITIVITY AFTE…			19355548	DIABETES CARE	DIABETES CARE	ENGLISH		137 – 142			105	DUNN J;ABUMRAD N;BREITMAN I;MARKS-SHULMAN P;FLYNN C;JABBOUR K;FEURER I;TAMBOLI R	10.2337/dc11-1383	HEPATIC AND PERIPHERAL INSULIN SENSITIVITY AND DIABETES REMISSION AT 1 MONTH AFTER ROUXENY GASTRIC BYPASS SURGERY IN PATIENTS RANDOMIZED TO OMENTECTOMY	1	2012	DUNN JULIA P;ABUMRAD NAJI N;BREITMAN IGAL;MARKS-SHULMAN PAMELA A;FLYNN CHARLES ROBB;JABBOUR KAREEM;FEURER IRENE D;TAMBOLI ROBYN A	R.A. TAMBOLI; DEPARTMENT OF SURGERY, VANDERBILT UNIVERSITY SCHOOL OF MEDICINE, NASHVILLE, TN, UNITED STATES; EMAIL: ROBYN.TAMBOLI@VANDERBILT.EDU		VANDERBILT UNIVERSITY SCHOOL OF MEDICINE;VANDERBILT UNIVERSITY SCHOOL OF MEDICINE;VANDERBILT UNIVERSITY SCHOOL OF MEDICINE	DUNN J, 2012, DIABETES CARE	https://www.scopus.com/inward/record.uri?eid=2-s2.0-84859041004&doi=10.2337%2fdc11-1383&partnerID=40&md5=0fb93ae6bf5538e9896815a6dc35a588	SCOPUS
ADULT; AMINO ACIDS, BRANCHED-CHAIN/METABOLISM; BLOOD GLUCOSE/METABOLISM; CALORIC RESTRICTION; FEMALE; GASTRIC BYPASS; GASTROPLASTY; HUMANS; INSULIN/PHARMACOLOGY; INSULIN RESISTANCE; LAPAROSCOPY; MALE; MUSCLE, SKELETAL/METABOLISM; OBESITY/METABOLISM/SURGERY; PHOSPHORYLATION; TOR SERINE-THREONINE KINASES/METABOLISM	ADULT;AMINO ACIDS, BRANCHED-CHAIN/METABOLISM;BLOOD GLUCOSE/METABOLISM;CALORIC RESTRICTION;FEMALE;GASTRIC BYPASS;GASTROPLASTY;HUMANS;INSULIN/PHARMACOLOGY;INSULIN RESISTANCE;LAPAROSCOPY;MALE;MUSCLE, SKELETAL/METABOLISM;OBESITY/METABOLISM/SURGERY;PHOSPHORYLATION;TOR SERINE-THREONINE KINASES/METABOLISM	CENTER FOR HUMAN NUTRITION AND ATKINS CENTER OF EXCELLENCE IN OBESITY MEDICINE,WASHINGTON UNIVERSITY SCHOOL OF MEDICINE, ST LOUIS, MISSOURI, USA.;	IT HAS BEEN HYPOTHESIZED THAT A GREATER DECLINE IN CIRCULATING BRANCHED-CHAIN AMINO ACIDS (BCAAS) AFTER WEIGHT LOSS INDUCED BY ROUX-EN-Y GASTRIC BYPASS (RYGB) SURGERY THAN AFTER CALORIE RESTRICTION ALONE HAS INDEPENDENT EFFECTS ON GLUCOSE HOMEOSTASIS, POSSIBLY BY DECREASED SIGNALING THROUGH THE MAMMALIAN TARGET OF RAPAMYCIN (MTOR). WE EVALUATED PLASMA BCAAS AND THEIR C3 AND C5 ACYLCARNITINE METAB…			1939-327X (ELECTRONIC) 0012-1797 (PRINT) 0012-1797 (LINKING)		DIABETES..	ENG		2757-61			105	MAGKOS F;BRADLEY D;SCHWEITZER G;FINCK B;EAGON J;ILKAYEVA O;NEWGARD C;KLEIN S	10.2337/DB13-0185	EFFECT OF ROUXENY GASTRIC BYPASS AND LAPAROSCOPIC ADJUSTABLE GASTRIC BANDING ON BRANCHEDCHAIN AMINO ACID METABOLISM	2	2013	MAGKOS, FAIDON;BRADLEY, DAVID;SCHWEITZER, GEORGE G;FINCK, BRIAN N;EAGON, J CHRISTOPHER;ILKAYEVA, OLGA;NEWGARD, CHRISTOPHER B;KLEIN, SAMUEL		Adult;Amino Acids, Branched-Chain/metabolism;Blood Glucose/metabolism;Caloric Restriction;Female;Gastric Bypass;Gastroplasty;Humans;Insulin/pharmacology;Insulin Resistance;Laparoscopy;Male;Muscle, Skeletal/metabolism;Obesity/metabolism/surgery;Phosphorylation;TOR Serine-Threonine Kinases/metabolism	WASHINGTON UNIVERSITY SCHOOL OF MEDICINE	MAGKOS F, 2013, DIABETES		PUBMED
ADOLESCENT; ADULT; BILE ACIDS AND SALTS; BLOOD GLUCOSE; BODY MASS INDEX; FASTING; FEMALE; FOLLOW-UP STUDIES; GASTRIC BYPASS; HUMANS; INSULIN; INSULIN RESISTANCE; MALE; MIDDLE AGED; OBESITY; MORBID; TREATMENT OUTCOME; WEIGHT LOSS; YOUNG ADULT; BILE ACID; GLYCINE; TAURINE; URSODEOXYCHOLIC ACID; GLUCOSE BLOOD LEVEL; ARTICLE; BILE ACID BLOOD LEVEL; CLINICAL ARTICLE; CONTROLLED STUDY; HORMONE DETERMIN…	ADOLESCENT; ADULT; BILE ACIDS AND SALTS; BLOOD GLUCOSE; BODY MASS INDEX; FASTING; FEMALE; FOLLOW-UP STUDIES; GASTRIC BYPASS; HUMANS; INSULIN; INSULIN RESISTANCE; MALE; MIDDLE AGED; OBESITY; MORBID; TREATMENT OUTCOME; WEIGHT LOSS; YOUNG ADULT; BILE ACID; GLYCINE; INSULIN; TAURINE; URSODEOXYCHOLIC ACID; BILE ACID; GLUCOSE BLOOD LEVEL; INSULIN; ADULT; ARTICLE; BILE ACID BLOOD LEVEL; CLINICAL ARTICLE…	DEPARTMENT OF SURGERY, VANDERBILT UNIVERSITY MEDICAL CENTER, 1121 21ST AVENUE SOUTH, NASHVILLE, 37232, TN, UNITED STATES; ROSALIND FRANKLIN UNIVERSITY, NORTH CHICAGO, 60064, IL, UNITED STATES; DEPARTMENT OF BIOCHEMISTRY, VANDERBILT UNIVERSITY MEDICAL CENTER, NASHVILLE, 37232, TN, UNITED STATES	CONTEXT: ROUX-EN-Y GASTRIC BYPASS (RYGB) IS THE MOST EFFECTIVE TREATMENT FOR MORBID OBESITY AND RESOLUTION OF DIABETES. OVER THE LAST DECADE, IT HAS BECOME WELL ACCEPTED THAT THIS RESOLUTION OF DIABETES OCCURS BEFORE SIGNIFICANT WEIGHT LOSS; HOWEVER, THE MECHANISMS BEHIND THIS EFFECT REMAIN UNKNOWN AND COULD REPRESENT NOVEL THERAPEUTIC TARGETS FOR OBESITY AND DIABETES. BILE ACIDS HAVE BEEN IDENTI…			0021972X	J. CLIN. ENDOCRINOL. METAB.	JOURNAL OF CLINICAL ENDOCRINOLOGY AND METABOLISM	ENGLISH		E1225 – E1233	ENDOCRINE SOCIETY		105	ALBAUGH V;FLYNN C;CAI S;XIAO Y;TAMBOLI R;ABUMRAD N	10.1210/jc.2015-2467	EARLY INCREASES IN BILE ACIDS POST ROUXENY GASTRIC BYPASS ARE DRIVEN BY INSULINSENSITIZING SECONDARY BILE ACIDS	1	2015	ALBAUGH VANCE L;FLYNN CHARLES ROBB;CAI STEVEN;XIAO YI;TAMBOLI ROBYN A;ABUMRAD NAJI N	V.L. ALBAUGH; DEPARTMENT OF SURGERY, VANDERBILT UNIVERSITY MEDICAL CENTER, NASHVILLE, 1121 21ST AVENUE SOUTH, 37232, UNITED STATES; EMAIL: NAJI.ABUMRAD@VANDERBILT.EDU		VANDERBILT UNIVERSITY MEDICAL CENTER;ROSALIND FRANKLIN UNIVERSITY;VANDERBILT UNIVERSITY MEDICAL CENTER	ALBAUGH V, 2015, J CLIN ENDOCRINOL METAB	https://www.scopus.com/inward/record.uri?eid=2-s2.0-84941654446&doi=10.1210%2fjc.2015-2467&partnerID=40&md5=ad0ea24c741ccc0b0ea5df5db6646029	SCOPUS
QUALITY-OF-LIFE; BARIATRIC SURGERY; MORBID-OBESITY; MEDICAL THERAPY; VALIDATION; INDEX; METAANALYSIS; MANAGEMENT; OUTCOMES; IMPACT	QUALITY-OF-LIFE; BARIATRIC SURGERY; MORBID-OBESITY; MEDICAL THERAPY; VALIDATION; INDEX; METAANALYSIS; MANAGEMENT; OUTCOMES; IMPACT	MUTTER, D (CORRESPONDING AUTHOR), UNIV HOSP STRASBOURG, DEPT DIGEST \& ENDOCRINE SURG, 1 PL HOP, F-67091 STRASBOURG, FRANCE.; IGNAT, M.; VIX, M.; D'URSO, A.; PERRETTA, S.; MARESCAUX, J.; MUTTER, D., UNIV HOSP STRASBOURG, DEPT DIGEST \& ENDOCRINE SURG, RES INST DIGEST CANC IRCAD, INST IMAGE GUIDED SURG IHU, STRASBOURG, FRANCE.; IMAD, I., IHU, STRASBOURG, FRANCE.	BACKGROUND: ROBUST DATA ON QUALITY OF LIFE (QOL) AFTER DIFFERENT TECHNIQUES OF BARIATRIC SURGERY ARE SPARSE. THIS RCT COMPARED EXCESS WEIGHT LOSS (EWL) AND QOL AFTER SLEEVE GASTRECTOMY VERSUS ROUX-EN-Y GASTRIC BYPASS (RYGB). METHODS: OBESE PATIENTS WERE ASSIGNED RANDOMLY TO RYGB OR SLEEVE GASTRECTOMY. THE PRIMARY OUTCOME MEASURE WAS EWL. SECONDARY OUTCOMES INCLUDED QOL, CO-MORBIDITY, ADVERSE EVEN…	GREAT CLARENDON ST, OXFORD OX2 6DP, ENGLAND	CHU STRASBOURG	0007-1323	BR. J. SURG.	BRITISH JOURNAL OF SURGERY	ENGLISH	D'URSO, ANTONIO/0000-0002-1880-4635 IGNAT, MIHAELA/0000-0002-0250-3280	248-256	OXFORD UNIV PRESS	SURGERY	105	IGNAT M;VIX M;IMAD I;D'URSO A;PERRETTA S;MARESCAUX J;MUTTER D	10.1002/bjs.10400	RANDOMIZED TRIAL OF ROUXENY GASTRIC BYPASS VERSUS SLEEVE GASTRECTOMY IN ACHIEVING EXCESS WEIGHT LOSS	2	2017	IGNAT M;VIX M;IMAD I;D'URSO A;PERRETTA S; MARESCAUX J;MUTTER D	MUTTER, D (CORRESPONDING AUTHOR), UNIV HOSP STRASBOURG, DEPT DIGEST \& ENDOCRINE SURG, 1 PL HOP, F-67091 STRASBOURG, FRANCE		UNIV HOSP STRASBOURG;MARESCAUX;UNIV HOSP STRASBOURG	IGNAT M, 2017, BR J SURG		ISI
CARDIOVASCULAR OUTCOMES; SLEEVE GASTRECTOMY; BARIATRIC SURGERY; WEIGHT-LOSS; RISK; ALBUMINURIA; COMPLICATIONS; ASSOCIATION; PROTEINURIA; PREVALENCE	CARDIOVASCULAR OUTCOMES; SLEEVE GASTRECTOMY; BARIATRIC SURGERY; WEIGHT-LOSS; RISK; ALBUMINURIA; COMPLICATIONS; ASSOCIATION; PROTEINURIA; PREVALENCE	COHEN, RV (CORRESPONDING AUTHOR), OSWALDO CRUZ GERMAN HOSP, CTR OBES \& DIABET, RUA CINCINATO BRAGA 37, BR-01333010 SAO PAULO, SP, BRAZIL.; COHEN, RICARDO VITOR; ABOUD, CRISTINA MAMEDIO; ZANATA PETRY, TARISSA BEATRICE; LOPES CORREA, JOSE LUIS; POMPILIO, CARLOS EDUARDO; QUIRINO PECHY, FERNANDO NOGUEIRA; CALMON DA COSTA SILVA, ANA CAROLINA; GOMES DE MELO, FERNANDA LENDIMUTH; CUNHA DA SILVEIRA, LIVI…	IMPORTANCE EARLY-STAGE CHRONIC KIDNEY DISEASE (CKD) CHARACTERIZED BY MICROALBUMINURIA IS ASSOCIATED WITH FUTURE CARDIOVASCULAR EVENTS, PROGRESSION TOWARD END-STAGE RENAL DISEASE, AND EARLY MORTALITY IN PATIENTS WITH TYPE 2 DIABETES. OBJECTIVE TO COMPARE THE ALBUMINURIA-LOWERING EFFECTS OF ROUX-EN-Y GASTRIC BYPASS (RYGB) SURGERY VS BEST MEDICAL TREATMENT IN PATIENTS WITH EARLY-STAGE CKD, TYPE 2 DI…	330 N WABASH AVE, STE 39300, CHICAGO, IL 60611-5885 USA	UNIVERSITY OF TORONTO; SAINT MICHAELS HOSPITAL TORONTO; HOSPITAL DO CORACAO - HCOR; UNIVERSITY COLLEGE DUBLIN; UNIVERSITY OF GOTHENBURG; SAHLGRENSKA UNIVERSITY HOSPITAL; IMPERIAL COLLEGE LONDON	2168-6254	JAMA SURG.	JAMA SURGERY	ENGLISH	DOCHERTY, NEIL/0000-0002-0961-2607 LE ROUX, CAREL/0000-0001-5521-5445		AMER MEDICAL ASSOC	SURGERY	105	COHEN R;PEREIRA T;ABOUD C;MAMEDIO M;ZANATA P T;LOPES C J;SCHIAVON C;POMPILIO C;QUIRINO Q;PECHY F;CALMON D C S A;GOMES D M F;CUNHA D S L;DE P C P;HALPERN H;JACY M;FREDERICO D L F;MARTINS B;KUGA R;SARIAN P T;DOCHERTY N;LE R C	10.1001/jamasurg.2020.0420	EFFECT OF GASTRIC BYPASS VS BEST MEDICAL TREATMENT ON EARLYSTAGE CHRONIC KIDNEY DISEASE IN PATIENTS WITH TYPE 2 DIABETES AND OBESITY A RANDOMIZED CLINICAL TRIAL	1	2020	COHEN RICARDO VITOR;PEREIRA TIAGO VEIGA;ABOUD CRISTINA; MAMEDIO;ZANATA PETRY TARISSA BEATRICE;LOPES CORREA JOSE LUIS;SCHIAVON CARLOS AURELIO;POMPILIO CARLOS EDUARDO;QUIRINO; PECHY FERNANDO NOGUEIRA;CALMON DA COSTA SILVA ANA CAROLINA; GOMES DE MELO FERNANDA LENDIMUTH;CUNHA DA SILVEIRA LIVIA PORTO; DE PARIS CARAVATTO PEDRO PAULO;HALPERN HELIO;JACY MONTEIRO; FREDERICO DE LIMA;MARTINS BRUNO DA COSTA;…	COHEN, RV (CORRESPONDING AUTHOR), OSWALDO CRUZ GERMAN HOSP, CTR OBES \& DIABET, RUA CINCINATO BRAGA 37, BR-01333010 SAO PAULO, SP, BRAZIL		CTR OBES AND DIABET;CTR OBES AND DIABET;APPL HLTH RES CTR;INT RES CTR;SCHIAVON;UNIV COLL DUBLIN;UNIV GOTHENBURG;IMPERIAL COLL LONDON	COHEN R, 2020, JAMA SURG		ISI
GASTRIC BYPASS; LAPAROSCOPIC; LIMB LENGTHS; MORBID OBESITY; ADULT; ANALYSIS OF VARIANCE; ANASTOMOSIS; ROUX-EN-Y; BILIOPANCREATIC DIVERSION; BODY MASS INDEX; CHI-SQUARE DISTRIBUTION; FEMALE; FOLLOW-UP STUDIES; HUMANS; LAPAROSCOPY; MALE; MIDDLE AGED; OBESITY; MORBID; POSTOPERATIVE COMPLICATIONS; PROBABILITY; PROSPECTIVE STUDIES; RISK ASSESSMENT; SEVERITY OF ILLNESS INDEX; TREATMENT OUTCOME; WEIGHT …	ADULT; ANALYSIS OF VARIANCE; ANASTOMOSIS; ROUX-EN-Y; BILIOPANCREATIC DIVERSION; BODY MASS INDEX; CHI-SQUARE DISTRIBUTION; FEMALE; FOLLOW-UP STUDIES; GASTRIC BYPASS; HUMANS; LAPAROSCOPY; MALE; MIDDLE AGED; OBESITY; MORBID; POSTOPERATIVE COMPLICATIONS; PROBABILITY; PROSPECTIVE STUDIES; RISK ASSESSMENT; SEVERITY OF ILLNESS INDEX; TREATMENT OUTCOME; WEIGHT LOSS; ASCORBIC ACID; CALCIUM; CHROMOGEN FORT…	DEPARTMENT OF SURGERY, COLLEGE OF PHYSICIANS AND SURGEONS, COLUMBIA UNIVERSITY, NEW YORK, NY, UNITED STATES; DEPARTMENT OF SURGERY, CORNELL UNIVERSITY, NEW YORK-PRESBYTERIAN HOSPITAL, NEW YORK, NY, UNITED STATES; SECTION OF ENDOCRINE SURGERY, COLUMBIA UNIVERSITY, NEW YORK, NY, 161 FORT WASHINGTON AVE., UNITED STATES	BACKGROUND: IT HAS BEEN SHOWN THAT LONG LIMB GASTRIC BYPASS IN THE SUPER-OBESE (BMI >50) RESULTS IN INCREASED WEIGHT LOSS IN COMPARISON WITH CONVENTIONAL GASTRIC BYPASS. THE PURPOSE OF THIS STUDY WAS TO COMPARE THE EFFECT OF SHORT AND LONG LIMB LENGTHS IN PATIENTS WITH BMI<50. METHODS: 48 PATIENTS WITH BMI <50 (46 FEMALES/2 MALES, MEAN AGE 35±9.6 YEARS) WERE PROSPECTIVELY RANDOMIZED TO EITHER A S…			09608923	OBES. SURG.	OBESITY SURGERY	ENGLISH		51 – 57			104	INABNET W;QUINN T;GAGNER M;URBAN M;POMP A	10.1381/0960892052993468	LAPAROSCOPIC ROUXENY GASTRIC BYPASS IN PATIENTS WITH BMI <50: A PROSPECTIVE RANDOMIZED TRIAL COMPARING SHORT AND LONG LIMB LENGTHS	1	2005	INABNET WILLIAM B;QUINN THERESA;GAGNER MICHEL;URBAN MEREDITH;POMP ALFONS	W.B. INABNET; SECTION OF ENDOCRINE SURGERY, COLUMBIA UNIVERSITY, NEW YORK, NY, 161 FORT WASHINGTON AVE., UNITED STATES; EMAIL: WBI2102@COLUMBIA.EDU	Gastric bypass; Laparoscopic; Limb lengths; Morbid obesity	COLUMBIA UNIVERSITY;CORNELL UNIVERSITY;COLUMBIA UNIVERSITY	INABNET W, 2005, OBES SURG	https://www.scopus.com/inward/record.uri?eid=2-s2.0-13444293470&doi=10.1381%2f0960892052993468&partnerID=40&md5=b3648d044a8ab866d7bfab35f93928d4	SCOPUS
CALCIUM CARBONATE; CALCIUM CITRATE; OBESITY; ROUX-EN-Y GASTRIC BYPASS; ADULT; AREA UNDER CURVE; CROSS-OVER STUDIES; DIETARY SUPPLEMENTS; DOUBLE-BLIND METHOD; FEMALE; GASTRIC BYPASS; HUMANS; INTESTINAL ABSORPTION; MALE; MIDDLE AGED; MORBID; PARATHYROID HORMONE; CALCIUM; CITRATE CALCIUM; CREATININE; AGED; AREA UNDER THE CURVE; ARTICLE; CALCIUM ABSORPTION; CALCIUM BLOOD LEVEL; CALCIUM URINE LEVEL; C…	ADULT; AREA UNDER CURVE; CALCIUM CARBONATE; CALCIUM CITRATE; CROSS-OVER STUDIES; DIETARY SUPPLEMENTS; DOUBLE-BLIND METHOD; FEMALE; GASTRIC BYPASS; HUMANS; INTESTINAL ABSORPTION; MALE; MIDDLE AGED; OBESITY; MORBID; PARATHYROID HORMONE; CALCIUM; CALCIUM CARBONATE; CITRATE CALCIUM; CREATININE; PARATHYROID HORMONE; ADULT; AGED; AREA UNDER THE CURVE; ARTICLE; CALCIUM ABSORPTION; CALCIUM BLOOD LEVEL; C…	DEPARTMENT OF INTERNAL MEDICINE, CHARLES AND JANE PAK CENTER FOR MINERAL METABOLISM, UT SOUTHWESTERN MEDICAL CENTER, DALLAS, TX 75390-8885, UNITED STATES; DIVISION OF BIOSTATISTICS, DEPARTMENT OF CLINICAL SCIENCES, UT SOUTHWESTERN MEDICAL CENTER, DALLAS, TX, UNITED STATES; PROVOST BARIATRICS, DENTON, TX, UNITED STATES; CITIZENS BARIATRIC CENTER, VICTORIA, TX, UNITED STATES	INTRODUCTION: ROUX-EN-Y GASTRIC BYPASS (RYGB) RESTRICTS FOOD INTAKE. CONSEQUENTLY, PATIENTS CONSUME LESS CALCIUM. IN ADDITION, FOOD NO LONGER PASSES THROUGH THE DUODENUM, THE MAIN SITE OF CALCIUM ABSORPTION. THEREFORE, CALCIUM ABSORPTION IS SIGNIFICANTLY IMPAIRED. THE GOAL OF THIS STUDY IS TO COMPARE TWO COMMON CALCIUM SUPPLEMENTS IN GASTRIC BYPASS PATIENTS. METHOD: NINETEEN PATIENTS WERE ENROLLE…			09608923	OBES. SURG.	OBESITY SURGERY	ENGLISH		1256 – 1261			104	TONDAPU P;PROVOST D;ADAMS-HUET B;SIMS T;CHANG C;SAKHAEE K	10.1007/s11695-009-9850-6	COMPARISON OF THE ABSORPTION OF CALCIUM CARBONATE AND CALCIUM CITRATE AFTER ROUXENY GASTRIC BYPASS	1	2009	TONDAPU P;PROVOST D;ADAMS-HUET B;SIMS T;CHANG C;SAKHAEE K	K. SAKHAEE; DEPARTMENT OF INTERNAL MEDICINE, CHARLES AND JANE PAK CENTER FOR MINERAL METABOLISM, UT SOUTHWESTERN MEDICAL CENTER, DALLAS, TX 75390-8885, UNITED STATES; EMAIL: KHASHAYAR.SAKHAEE@UTSOUTHWESTERN.EDU	Calcium carbonate; Calcium citrate; Obesity; Roux-en-Y gastric bypass	CHARLES AND JANE PAK CENTER FOR MINERAL METABOLISM;DEPARTMENT OF CLINICAL SCIENCES;CITIZENS BARIATRIC CENTER	TONDAPU P, 2009, OBES SURG	https://www.scopus.com/inward/record.uri?eid=2-s2.0-69249215435&doi=10.1007%2fs11695-009-9850-6&partnerID=40&md5=0759f5ee2cb580715c118e75f494feb2	SCOPUS
ADULT; APPETITE; CACAO; CROSS-OVER STUDIES; DOUBLE-BLIND METHOD; FEMALE; FOOD; GASTRIC BYPASS; GASTROINTESTINAL HORMONES; HUMANS; MAGNETIC RESONANCE IMAGING; MALE; MIDDLE AGED; OBESITY; OCTREOTIDE; OXYGEN; PHOTIC STIMULATION; REWARD; SATIATION; FIBROBLAST GROWTH FACTOR 19; GASTROINTESTINAL HORMONE; GLUCAGON LIKE PEPTIDE 1; GLUCOSE; PEPTIDE YY; ARTICLE; BOLD SIGNAL; CLINICAL ARTICLE; CONTROLLED ST…	ADULT; APPETITE; CACAO; CROSS-OVER STUDIES; DOUBLE-BLIND METHOD; FEMALE; FOOD; GASTRIC BYPASS; GASTROINTESTINAL HORMONES; HUMANS; MAGNETIC RESONANCE IMAGING; MALE; MIDDLE AGED; OBESITY; OCTREOTIDE; OXYGEN; PHOTIC STIMULATION; REWARD; SATIATION; FIBROBLAST GROWTH FACTOR 19; GASTROINTESTINAL HORMONE; GLUCAGON LIKE PEPTIDE 1; GLUCOSE; PEPTIDE YY; GASTROINTESTINAL HORMONE; OCTREOTIDE; OXYGEN; ADULT; …	CENTRE FOR NEUROPSYCHOPHARMACOLOGY, BURLINGTON DANES BUILDING, DIVISION OF BRAIN SCIENCES, IMPERIAL COLLEGE LONDON, HAMMERSMITH HOSPITAL, DU CANE ROAD, LONDON, W12 0NN, UNITED KINGDOM	CONTEXT: ROUX-EN-Y GASTRIC BYPASS (RYGB) SURGERY IS AN EFFECTIVE LONG-TERM INTERVENTION FOR WEIGHT LOSS MAINTENANCE, REDUCING APPETITE, AND ALSO FOOD REWARD, VIA UNCLEAR MECHANISMS. OBJECTIVE: TO INVESTIGATE THE ROLE OF ELEVATED SATIETY GUT HORMONES AFTER RYGB, WE EXAMINED FOOD HEDONIC-REWARD RESPONSES AFTER THEIR ACUTE POST-PRANDIAL SUPPRESSION. DESIGN: THESE WERE RANDOMIZED, PLACEBO-CONTROLLED,…			0021972X	J. CLIN. ENDOCRINOL. METAB.	JOURNAL OF CLINICAL ENDOCRINOLOGY AND METABOLISM	ENGLISH		599 – 609	ENDOCRINE SOCIETY		102	GOLDSTONE A;MIRAS A;SCHOLTZ S;JACKSON S;NEFF K;PÉNICAUD L;GEOGHEGAN J;CHHINA N;DURIGHEL G;BELL J;MEILLON S;LE R C	10.1210/jc.2015-2665	LINK BETWEEN INCREASED SATIETY GUT HORMONES AND REDUCED FOOD REWARD AFTER GASTRIC BYPASS SURGERY FOR OBESITY	1	2016	GOLDSTONE ANTHONY P;MIRAS ALEXANDER D;SCHOLTZ SAMANTHA;JACKSON SABRINA;NEFF KARL J;PÉNICAUD LUC;GEOGHEGAN JUSTIN;CHHINA NAVPREET;DURIGHEL GIULIANA;BELL JIMMY D;MEILLON SOPHIE;LE ROUX CAREL W	A.P. GOLDSTONE; CENTRE FOR NEUROPSYCHOPHARMACOLOGY, BURLINGTON DANES BUILDING, DIVISION OF BRAIN SCIENCES, IMPERIAL COLLEGE LONDON, HAMMERSMITH HOSPITAL, LONDON, DU CANE ROAD, W12 0NN, UNITED KINGDOM; EMAIL: TONY.GOLDSTONE@IMPERIAL.AC.UK		IMPERIAL COLLEGE LONDON	GOLDSTONE A, 2016, J CLIN ENDOCRINOL METAB	https://www.scopus.com/inward/record.uri?eid=2-s2.0-84959422920&doi=10.1210%2fjc.2015-2665&partnerID=40&md5=82ee6442527db741b70942b010a064c3	SCOPUS
POSTOPERATIVE WEIGHT REGAIN; BEHAVIORAL INTERVENTION; EHEALTH; RANDOMIZED CONTROLLED-TRIAL; ACCEPTANCE-BASED TREATMENT; SOCIAL ANXIETY; DISORDER; GASTRIC BYPASS-SURGERY; COMMITMENT THERAPY; EATING BEHAVIOR; FOLLOW-UP; RITUAL PREVENTION; PHYSICAL-ACTIVITY; DIETARY-INTAKE	RANDOMIZED CONTROLLED-TRIAL; ACCEPTANCE-BASED TREATMENT; SOCIAL ANXIETY; DISORDER; GASTRIC BYPASS-SURGERY; COMMITMENT THERAPY; EATING BEHAVIOR; FOLLOW-UP; RITUAL PREVENTION; PHYSICAL-ACTIVITY; DIETARY-INTAKE	BRADLEY, LE (CORRESPONDING AUTHOR), RUSH UNIV, DEPT BEHAV SCI, MED CTR, 1645 W JACKSON BLVD SUITE 400, CHICAGO, IL 60625 USA.; BRADLEY, LAUREN E., RUSH UNIV, DEPT BEHAV SCI, MED CTR, 1645 W JACKSON BLVD SUITE 400, CHICAGO, IL 60625 USA.; FORMAN, EVAN M.; KERRIGAN, STEPHANIE G.; GOLDSTEIN, STEPHANIE P.; BUTRYN, MEGHAN L.; HERBERT, JAMES D., DREXEL UNIV, DEPT PSYCHOL, PHILADELPHIA, PA 19104 USA.; T…	WEIGHT REGAIN FOLLOWING BARIATRIC SURGERY IS COMMON AND POTENTIALLY COMPROMISES THE HEALTH BENEFITS INITIALLY ATTAINED AFTER SURGERY. POOR COMPLIANCE TO DIETARY AND PHYSICAL ACTIVITY PRESCRIPTIONS IS BELIEVED TO BE LARGELY RESPONSIBLE FOR WEIGHT REGAIN. PATIENTS MAY BENEFIT FROM DEVELOPING SPECIALIZED PSYCHOLOGICAL SKILLS NECESSARY TO ENGAGE IN POSITIVE HEALTH BEHAVIORS OVER THE LONG TERM. UNFORT…	233 SPRING ST, NEW YORK, NY 10013 USA	RUSH UNIVERSITY; DREXEL UNIVERSITY; BROWN UNIVERSITY; PENNSYLVANIA COMMONWEALTH SYSTEM OF HIGHER EDUCATION (PCSHE); TEMPLE UNIVERSITY	0960-8923	OBES. SURG.	OBESITY SURGERY	ENGLISH	FORMAN, EVAN/0000-0001-7233-1384 BRADLEY, LAUREN/0000-0001-5202-7748 GOLDSTEIN, STEPHANIE/0000-0002-9656-1675	586-598	SPRINGER	SURGERY	102	BRADLEY L;FORMAN E;KERRIGAN S;GOLDSTEIN S;BUTRYN M;THOMAS J;HERBERT J;SARWER D	10.1007/s11695-016-2337-3	PROJECT HELP: A REMOTELY DELIVERED BEHAVIORAL INTERVENTION FOR WEIGHT REGAIN AFTER BARIATRIC SURGERY	3	2017	BRADLEY LAUREN E;FORMAN EVAN M;KERRIGAN STEPHANIE G; GOLDSTEIN STEPHANIE P;BUTRYN MEGHAN L;THOMAS J GRAHAM; HERBERT JAMES D;SARWER DAVID B	BRADLEY, LE (CORRESPONDING AUTHOR), RUSH UNIV, DEPT BEHAV SCI, MED CTR, 1645 W JACKSON BLVD SUITE 400, CHICAGO, IL 60625 USA	Postoperative weight regain; Behavioral intervention; eHealth	RUSH UNIV;RUSH UNIV;DREXEL UNIV;BROWN UNIV;TEMPLE UNIV	BRADLEY L, 2017, OBES SURG		ISI
ADULT; AGED; ANTICOAGULANTS; FEMALE; GASTRIC BYPASS; HEPARIN; HUMANS; INCIDENCE; LAPAROSCOPY; MALE; MIDDLE AGED; OBESITY; MORBID; PRESSURE; PROSPECTIVE STUDIES; THROMBOEMBOLISM; ULTRASONOGRAPHY; DOPPLER; DUPLEX; VENA CAVA FILTERS; VENOUS THROMBOSIS; ARTICLE; BARIATRIC SURGERY; BLOOD FILTER; CLINICAL TRIAL; COMPRESSION THERAPY; DEEP VEIN THROMBOSIS; ECHOGRAPHY; HUMAN; PREOPERATIVE EVALUATION; PRIO…	ADULT; AGED; ANTICOAGULANTS; FEMALE; GASTRIC BYPASS; HEPARIN; HUMANS; INCIDENCE; LAPAROSCOPY; MALE; MIDDLE AGED; OBESITY; MORBID; PRESSURE; PROSPECTIVE STUDIES; THROMBOEMBOLISM; ULTRASONOGRAPHY; DOPPLER; DUPLEX; VENA CAVA FILTERS; VENOUS THROMBOSIS; HEPARIN; ADULT; AGED; ARTICLE; BARIATRIC SURGERY; BLOOD FILTER; CLINICAL TRIAL; COMPRESSION THERAPY; DEEP VEIN THROMBOSIS; ECHOGRAPHY; FEMALE; HUMAN;…	DEPARTMENT OF SURGERY, NORTHWESTERN UNIVERSITY FEINBERG SCHOOL OF MEDICINE, CHICAGO, IL, UNITED STATES; DEPARTMENT OF SURGERY, NORTHWESTERN UNIVERSITY FEINBERG SCHOOL OF MEDICINE, CHICAGO, IL 60611, 201 EAST HURON ST, GALTER 10-105, UNITED STATES	BACKGROUND. VENOUS THROMBOEMBOLISM (VTE), MANIFEST AS DEEP VENOUS THROMBOSIS (DVT) OR PULMONARY EMBOLUS, REMAINS AN IMPORTANT COMPLICATION IN BARIATRIC OPERATION PATIENTS. OUR PURPOSE WAS TO DETERMINE THE INCIDENCE OF VTE IN A CONSECUTIVE SERIES OF PATIENTS UNDERGOING ROUX-EN-Y GASTRIC BYPASS (RYGB) TO GUIDE APPROPRIATE THERAPY. METHODS. WE PROSPECTIVELY EXAMINED A CONSECUTIVE SERIES OF RYGB PATI…			00396060	SURGERY	SURGERY	ENGLISH		759 – 765			101	PRYSTOWSKY J;MORASCH M;ESKANDARI M;HUNGNESS E;NAGLE A	10.1016/j.surg.2005.07.024	PROSPECTIVE ANALYSIS OF THE INCIDENCE OF DEEP VENOUS THROMBOSIS IN BARIATRIC SURGERY PATIENTS	1	2005	PRYSTOWSKY JAY B;MORASCH MARK D;ESKANDARI MARK K;HUNGNESS ERIC S;NAGLE ALEX P	J.B. PRYSTOWSKY; DEPARTMENT OF SURGERY, NORTHWESTERN UNIVERSITY FEINBERG SCHOOL OF MEDICINE, CHICAGO, IL 60611, 201 EAST HURON ST, GALTER 10-105, UNITED STATES; EMAIL: JPRYSTOWSKY@NMFF.ORG		NORTHWESTERN UNIVERSITY FEINBERG SCHOOL OF MEDICINE;NORTHWESTERN UNIVERSITY FEINBERG SCHOOL OF MEDICINE	PRYSTOWSKY J, 2005, SURGERY	https://www.scopus.com/inward/record.uri?eid=2-s2.0-27544516002&doi=10.1016%2fj.surg.2005.07.024&partnerID=40&md5=cc961b8feccb30682ed5b1059036c784	SCOPUS
COBALT ALLERGY; CYANOCOBALAMIN; DESENSITIZATION; EXCIPIENT; HYDROXYCOBALAMIN; PEG; SDRIFE; SKIN TESTING; VIT B<SUB>12</SUB> ALLERGY; ANAPHYLAXIS; DRUG HYPERSENSITIVITY; HUMANS; INTRADERMAL TESTS; MIDDLE AGED; POLYETHYLENE GLYCOLS; SKIN TESTS; VITAMIN B 12; VITAMINS; COBALAMIN; COBALT; HYDROXOCOBALAMIN; MACROGOL; TRYPTASE; VITAMIN; ADULT; ANGIONEUROTIC EDEMA; ARTICLE; B12 DEFICIENCY; BURNING SENSA…	ANAPHYLAXIS; DRUG HYPERSENSITIVITY; HUMANS; INTRADERMAL TESTS; MIDDLE AGED; POLYETHYLENE GLYCOLS; SKIN TESTS; VITAMIN B 12; VITAMINS; COBALAMIN; COBALT; CYANOCOBALAMIN; HYDROXOCOBALAMIN; MACROGOL; TRYPTASE; CYANOCOBALAMIN; MACROGOL; VITAMIN; ADULT; ANAPHYLAXIS; ANGIONEUROTIC EDEMA; ARTICLE; B12 DEFICIENCY; BURNING SENSATION; CLINICAL ARTICLE; COHORT ANALYSIS; CONSCIOUSNESS; CONTROLLED STUDY; DIZZ…	DEPARTMENT OF ADULT ALLERGY, GUY'S AND ST THOMAS’ HOSPITAL, LONDON, UNITED KINGDOM; UNIVERSITY OF LIVERPOOL, SHEFFIELD UNIVERSITY TEACHING HOSPITAL, LIVERPOOL, UNITED KINGDOM; DEPARTMENT OF RESPIRATORY DIAGNOSTICS, MEDICAL UNIVERSITY OF BIALYSTOK, BIALYSTOK, POLAND	BACKGROUND: VITAMIN B12 (VIT B12) DEFICIENCY AFFECTS APPROXIMATELY 20% OF THOSE ABOVE THE AGE OF 60 YEARS IN THE UNITED KINGDOM AND UNITED STATES. IF UNTREATED, IT LEADS TO DETRIMENTAL HEALTH OUTCOMES. OBJECTIVE: TO INVESTIGATE A COHORT OF PATIENTS WITH VIT B12 HYPERSENSITIVITY (VB12H) REFERRED TO 3 UK ALLERGY CENTERS AND DESIGN A PATHWAY FOR THE INVESTIGATION OF VB12H. METHODS: A TOTAL OF 29 PAT…			22132198	J. ALLERGY CLIN. IMMUNOL. PRACT.	JOURNAL OF ALLERGY AND CLINICAL IMMUNOLOGY: IN PRACTICE	ENGLISH		699 – 704	AMERICAN ACADEMY OF ALLERGY, ASTHMA AND IMMUNOLOGY		98	EL R F;MUSTAFA A;WAGNER A;NAKONECHNA A;KAYODE O;RUTKOWSKI R;SIEW L;RUTKOWSKI K	10.1016/j.jaip.2023.10.037	VITAMIN B12 HYPERSENSITIVITY: A RETROSPECTIVE MULTICENTER STUDY	1	2024	EL RHERMOUL FATEMA-ZAHRA;MUSTAFA AMINA;WAGNER ANNETTE;NAKONECHNA ALLA;KAYODE OYINDAMOLA STEPHANIE;RUTKOWSKI RYSZARD;SIEW LEONARD QC;RUTKOWSKI KRZYSZTOF	F.-Z. EL RHERMOUL; GUY'S AND ST THOMAS’ HOSPITAL, GREAT MAZE POND, LONDON, SE1 9RT, UNITED KINGDOM; EMAIL: FZELRHERMOUL@GMAIL.COM	Cobalt allergy; Cyanocobalamin; Desensitization; Excipient; Hydroxycobalamin; PEG; SDRIFE; Skin testing; Vit B<sub>12</sub> allergy	GUY'S AND ST THOMAS’ HOSPITAL;UNIVERSITY OF LIVERPOOL;MEDICAL UNIVERSITY OF BIALYSTOK	EL R F, 2024, J ALLERGY CLIN IMMUNOL PRACT	https://www.scopus.com/inward/record.uri?eid=2-s2.0-85178602097&doi=10.1016%2fj.jaip.2023.10.037&partnerID=40&md5=b61b723753bb7429eb24612960ba5439	SCOPUS
BARIATRIC COMPLICATION; GLP-1; HYPERINSULINAEMIC HYPOGLYCAEMIA; HYPOGLYCAEMIA; LATE DUMPING SYNDROME; NESIDIOBLASTOSIS; NEUROGLYCOPENIA; NIPHS; NONINSULINOMA PANCREATOGENOUS HYPOGLYCAEMIA SYNDROME; POST-BARIATRIC HYPOGLYCAEMIA; ROUX-EN-Y GASTRIC BYPASS; RYGB; ADULT; CROSS-OVER STUDIES; DOUBLE-BLIND METHOD; FEMALE; GASTRIC BYPASS; GASTRIC INHIBITORY POLYPEPTIDE; GLUCAGON; GLUCAGON-LIKE PEPTIDE 1; …	ADULT; CROSS-OVER STUDIES; DOUBLE-BLIND METHOD; FEMALE; GASTRIC BYPASS; GASTRIC INHIBITORY POLYPEPTIDE; GLUCAGON; GLUCAGON-LIKE PEPTIDE 1; GLUCAGON-LIKE PEPTIDE-1 RECEPTOR; GLUCOSE; GLUCOSE TOLERANCE TEST; HUMANS; HYPOGLYCEMIA; INSULIN; MALE; MIDDLE AGED; PEPTIDE FRAGMENTS; SURVEYS AND QUESTIONNAIRES; EXENDIN 9 39; GLUCAGON; GLUCAGON LIKE PEPTIDE 1; GLUCAGON LIKE PEPTIDE 1 RECEPTOR; GLUCOSE; HYPE…	DEPARTMENT OF MEDICINE, DIVISION OF ENDOCRINOLOGY, STANFORD UNIVERSITY SCHOOL OF MEDICINE, 300 PASTEUR DRIVE, ROOM S025, STANFORD, 94305, CA, UNITED STATES; DEPARTMENT OF BIOMEDICAL SCIENCES, PANUM INSTITUTE, UNIVERSITY OF COPENHAGEN, COPENHAGEN, DENMARK	AIMS/HYPOTHESIS: POST-BARIATRIC HYPOGLYCAEMIA (PBH) IS A RARE, BUT SEVERE, METABOLIC DISORDER ARISING MONTHS TO YEARS AFTER BARIATRIC SURGERY. IT IS CHARACTERISED BY SYMPTOMATIC POSTPRANDIAL HYPOGLYCAEMIA, WITH INAPPROPRIATELY ELEVATED INSULIN CONCENTRATIONS. THE RELATIVE CONTRIBUTION OF EXAGGERATED INCRETIN HORMONE SIGNALLING TO DYSREGULATED INSULIN SECRETION AND SYMPTOMATIC HYPOGLYCAEMIA IS A S…			0012186X	DIABETOLOGIA	DIABETOLOGIA	ENGLISH		531 – 540	SPRINGER VERLAG		97	CRAIG C;LIU L;DEACON C;HOLST J;MCLAUGHLIN T	10.1007/s00125-016-4179-x	CRITICAL ROLE FOR GLP1 IN SYMPTOMATIC POSTBARIATRIC HYPOGLYCAEMIA	1	2017	CRAIG COLLEEN M;LIU LI-FEN;DEACON CAROLYN F;HOLST JENS J;MCLAUGHLIN TRACEY L	C.M. CRAIG; DEPARTMENT OF MEDICINE, DIVISION OF ENDOCRINOLOGY, STANFORD UNIVERSITY SCHOOL OF MEDICINE, STANFORD, 300 PASTEUR DRIVE, ROOM S025, 94305, UNITED STATES; EMAIL: CMCRAIG@STANFORD.EDU	Bariatric complication; GLP-1; Hyperinsulinaemic hypoglycaemia; Hypoglycaemia; Late dumping syndrome; Nesidioblastosis; Neuroglycopenia; NIPHS; Noninsulinoma pancreatogenous hypoglycaemia syndrome; Post-bariatric hypoglycaemia; Roux-en-Y gastric bypass; RYGB	STANFORD UNIVERSITY SCHOOL OF MEDICINE;UNIVERSITY OF COPENHAGEN	CRAIG C, 2017, DIABETOLOGIA	https://www.scopus.com/inward/record.uri?eid=2-s2.0-85006093261&doi=10.1007%2fs00125-016-4179-x&partnerID=40&md5=8f8b8aecd09a483796962ebbed624a2a	SCOPUS
ADULT; BODY MASS INDEX; CHINA; DIABETES MELLITUS, TYPE 2/BLOOD/COMPLICATIONS/SURGERY; FEMALE; GASTRIC BYPASS; GLYCATED HEMOGLOBIN/METABOLISM; HUMANS; LAPAROSCOPY; MALE; MIDDLE AGED; OBESITY/COMPLICATIONS; OVERWEIGHT/COMPLICATIONS/SURGERY; PROSPECTIVE STUDIES; REMISSION INDUCTION; TREATMENT OUTCOME	ADULT;BODY MASS INDEX;CHINA;DIABETES MELLITUS, TYPE 2/BLOOD/COMPLICATIONS/SURGERY;FEMALE;GASTRIC BYPASS;GLYCATED HEMOGLOBIN/METABOLISM;HUMANS;LAPAROSCOPY;MALE;MIDDLE AGED;OBESITY/COMPLICATIONS;OVERWEIGHT/COMPLICATIONS/SURGERY;PROSPECTIVE STUDIES;REMISSION INDUCTION;TREATMENT OUTCOME	BARIATRIC & METABOLIC INTERNATIONAL SURGERY CENTER, E-DA HOSPITAL, KAOHSIUNG, TAIWAN.;	BACKGROUND: LAPAROSCOPIC ROUX-EN-Y GASTRIC BYPASS (LRYGB) CAN DRAMATICALLY AMELIORATE TYPE 2 DIABETES MELLITUS (T2DM) IN MORBIDLY OBESE PATIENTS. HOWEVER, THERE IS LITTLE EVIDENCE SUPPORTING THE EFFECTIVENESS OF LRYGB IN LOW BODY MASS INDEX (BMI) PATIENTS. THE STUDY WAS DESIGNED TO EVALUATE THE SAFETY AND RESULTS OF LRYGB FOR ACHIEVING T2DM REMISSION IN PATIENTS WITH BMI IN THE RANGE OF 25-35 KG/…			1708-0428 (ELECTRONIC) 0960-8923 (PRINT) 0960-8923 (LINKING)		OBESITY SURGERY	ENG		1344-9			97	HUANG C;SHABBIR A;LO C;TAI C;CHEN Y;HOUNG J	10.1007/S11695-011-0408-Z	LAPAROSCOPIC ROUXENY GASTRIC BYPASS FOR THE TREATMENT OF TYPE II DIABETES MELLITUS IN CHINESE PATIENTS WITH BODY MASS INDEX OF 2535	1	2011	HUANG, CHIH-KUN;SHABBIR, ASIM;LO, CHI-HSIEN;TAI, CHI-MING;CHEN, YAW-SEN;HOUNG, JER-YIING		Adult;Body Mass Index;China;Diabetes Mellitus, Type 2/blood/complications/surgery;Female;Gastric Bypass;Glycated Hemoglobin/metabolism;Humans;Laparoscopy;Male;Middle Aged;Obesity/complications;Overweight/complications/surgery;Prospective Studies;Remission Induction;Treatment Outcome	BARIATRIC AND METABOLIC INTERNATIONAL SURGERY CENTER	HUANG C, 2011, OBES SURG		PUBMED
EDUCATIONAL PROGRAM; GASTRIC BYPASS; GROUP SESSION; WEIGHT REGAIN; CROSS-SECTIONAL STUDIES; HUMANS; OBESITY; MORBID; RETROSPECTIVE STUDIES; TREATMENT OUTCOME; WEIGHT GAIN; WEIGHT LOSS; MULTIVITAMIN; ADULT; ARTICLE; BODY MASS; BODY WEIGHT GAIN; BODY WEIGHT LOSS; CONTROLLED STUDY; CROSS-SECTIONAL STUDY; EDUCATION PROGRAM; FAMILY INCOME; FEMALE; FOLLOW UP; HUMAN; MAJOR CLINICAL STUDY; MALE; MINERAL …	CROSS-SECTIONAL STUDIES; GASTRIC BYPASS; HUMANS; OBESITY; MORBID; RETROSPECTIVE STUDIES; TREATMENT OUTCOME; WEIGHT GAIN; WEIGHT LOSS; MULTIVITAMIN; ADULT; ARTICLE; BODY MASS; BODY WEIGHT GAIN; BODY WEIGHT LOSS; CONTROLLED STUDY; CROSS-SECTIONAL STUDY; EDUCATION PROGRAM; FAMILY INCOME; FEMALE; FOLLOW UP; HUMAN; MAJOR CLINICAL STUDY; MALE; MINERAL SUPPLEMENTATION; OBSERVATIONAL STUDY; OUTCOME ASSES…	FACULTY OF SOCIAL SCIENCE AND HISTORY, VOLDA UNIVERSITY COLLEGE, JOPLASSVEGEN 1, VOLDA, 6103, NORWAY; DEPARTMENT OF SURGERY, MØRE AND ROMSDAL HOSPITAL TRUST, ÅLESUND HOSPITAL, ÅLESUND, NORWAY; CENTRE FOR OBESITY AND INNOVATION (OBECE), CLINIC OF SURGERY, ST. OLAV UNIVERSITY HOSPITAL, TRONDHEIM, NORWAY; OBESITY RESEARCH GROUP, DEPARTMENT OF CLINICAL AND MOLECULAR MEDICINE, FACULTY OF MEDICINE AND …	PURPOSE: ROUX-EN-Y GASTRIC BYPASS (RYGB) IS A WELL-DOCUMENTED TREATMENT OF SEVERE OBESITY. ATTENDING POSTOPERATIVE EDUCATIONAL PROGRAMS MAY IMPROVE THE OUTCOME. THE AIM OF THIS STUDY WAS TO EVALUATE WHETHER PARTICIPATION IN EDUCATIONAL PROGRAMS LASTING 2–3 YEARS AFTER RYGB INFLUENCES LONG-TERM WEIGHT LOSS, WEIGHT REGAIN, PHYSICAL ACTIVITY, AND COMPLIANCE TO MULTIVITAMIN SUPPLEMENTS. MATERIALS AND…			09608923	OBES. SURG.	OBESITY SURGERY	ENGLISH		3005 – 3012	SPRINGER		96	BJERKAN K;SANDVIK J;NYMO S;GRÆSLIE H;JOHNSEN G;MÅRVIK R;HYLDMO A;KULSENG B;HØYDAL K;HOFF D	10.1016/j.surg.2006.06.020	THE LONGTERM IMPACT OF POSTOPERATIVE EDUCATIONAL PROGRAMS ON WEIGHT LOSS AFTER ROUXENY GASTRIC BYPASS	1	2022	BJERKAN KIRSTI K;SANDVIK JORUNN;NYMO SIREN;GRÆSLIE HALLVARD;JOHNSEN GJERMUND;MÅRVIK RONALD;HYLDMO ÅSNE A;KULSENG BÅRD EIRIK;HØYDAL KJETIL LAURITS;HOFF DAG ARNE L	K.K. BJERKAN; FACULTY OF SOCIAL SCIENCE AND HISTORY, VOLDA UNIVERSITY COLLEGE, VOLDA, JOPLASSVEGEN 1, 6103, NORWAY; EMAIL: KIRSTI.KVERNDOKK.BJERKAN@HIVOLDA.NO	Educational program; Gastric bypass; Group session; Weight regain	VOLDA UNIVERSITY COLLEGE;MØRE AND ROMSDAL HOSPITAL TRUST;ST. OLAV UNIVERSITY HOSPITAL;NORWEGIAN UNIVERSITY OF SCIENCE AND TECHNOLOGY (NTNU);NORD-TRØNDELAG HOSPITAL TRUST;ST. OLAV’S UNIVERSITY HOSPITAL;VOLDA UNIVERSITY COLLEGE;MØRE AND ROMSDAL HOSPITAL TRUST;FACULTY OF MEDICINE AND HEALTH SCIENCES	BJERKAN K, 2022, OBES SURG	https://www.scopus.com/inward/record.uri?eid=2-s2.0-85133496090&doi=10.1007%2fs11695-022-06187-6&partnerID=40&md5=b8b3810e9890af2d7ac87767b200b896	SCOPUS
FUNDOPLICATION; GASTRIC BYPASS; GASTROESOPHAGEAL REFLUX DISEASED; LAPAROSCOPY; OUTCOMES; CONVENTIONAL NISSEN FUNDOPLICATION; RANDOMIZED CLINICAL-TRIAL; 7-YEAR; FOLLOW-UP; ANTIREFLUX SURGERY; INTRAABDOMINAL PRESSURE; IMPROVEMENT; OMEPRAZOLE; MANAGEMENT; THERAPY	CONVENTIONAL NISSEN FUNDOPLICATION; RANDOMIZED CLINICAL-TRIAL; 7-YEAR; FOLLOW-UP; ANTIREFLUX SURGERY; INTRAABDOMINAL PRESSURE; IMPROVEMENT; OMEPRAZOLE; MANAGEMENT; THERAPY	VARELA, JE (CORRESPONDING AUTHOR), VET AFFAIRS N TEXAS HLTH CARE SYSTERN, SURG SERV, 4500 S LANCASTER RD 112, DALLAS, TX 75216 USA.; VARELA, J. ESTEBAN, VET AFFAIRS N TEXAS HLTH CARE SYSTERN, SURG SERV, DALLAS, TX 75216 USA.; HINOJOSA, MARCELO W.; NGUYEN, NINH T., UNIV CALIF IRVINE, SCH MED, ORANGE, CA 92668 USA.	BACKGROUND: GASTROESOPHAGEAL REFLUX DISEASE (GERD) IS COMMONLY ASSOCIATED WITH MORBID OBESITY. LAPAROSCOPIC FUNDOPLICATION IS A STANDARD SURGICAL TREATMENT FOR GERD, AND LAPAROSCOPIC GASTRIC BYPASS HAS BEEN SHOWN TO EFFECTIVELY RESOLVE GERD SYMPTOMS IN THE MORBIDLY OBESE. WE SOUGHT TO COMPARE THE IN-HOSPITAL OUTCOMES OF MORBIDLY OBESE PATIENTS WHO UNDERWENT LAPAROSCOPIC FUNDOPLICATION FOR THE TRE…	360 PARK AVE SOUTH, NEW YORK, NY 10010-1710 USA	US DEPARTMENT OF VETERANS AFFAIRS; VETERANS HEALTH ADMINISTRATION (VHA); VA NORTH TEXAS HEALTH CARE SYSTEM; UNIVERSITY OF CALIFORNIA SYSTEM; UNIVERSITY OF CALIFORNIA IRVINE	1550-7289	SURG. OBES. RELAT. DIS.	SURGERY FOR OBESITY AND RELATED DISEASES	ENGLISH	VARELA, JAVIER/0000-0003-2504-0503	139-143	ELSEVIER SCIENCE INC	SURGERY	96	VARELA J;HINOJOSA M;NGUYEN N	10.1016/j.soard.2008.08.021	LAPAROSCOPIC FUNDOPLICATION COMPARED WITH LAPAROSCOPIC GASTRIC BYPASS IN MORBIDLY OBESE PATIENTS WITH GASTROESOPHAGEAL REFLUX DISEASE	1	2009	VARELA J ESTEBAN;HINOJOSA MARCELO W;NGUYEN NINH T	VARELA, JE (CORRESPONDING AUTHOR), VET AFFAIRS N TEXAS HLTH CARE SYSTERN, SURG SERV, 4500 S LANCASTER RD 112, DALLAS, TX 75216 USA	Fundoplication; Gastric bypass; Gastroesophageal reflux diseased; Laparoscopy; Outcomes	JE (CORRESPONDING AUTHOR);UNIV CALIF IRVINE	VARELA J, 2009, SURG OBES RELAT DIS		ISI
ADULT; BLOOD GLUCOSE; BLOOD GLUCOSE SELF-MONITORING; BODY WEIGHT; DIABETES MELLITUS; TYPE 2; DRUG THERAPY; COMBINATION; FEMALE; GLUCAGON-LIKE PEPTIDE 1; HUMANS; HYPOGLYCEMIA; INFUSIONS; SUBCUTANEOUS; INSULIN; MALE; MEALS; MIDDLE AGED; OBESITY; OXYNTOMODULIN; PEPTIDE YY; POSTPRANDIAL PERIOD; PREDIABETIC STATE; SINGLE-BLIND METHOD; WEIGHT LOSS; FRUCTOSAMINE; GLUCAGON LIKE PEPTIDE 1; GLUCOSE; PLACEB…	ADULT; BLOOD GLUCOSE; BLOOD GLUCOSE SELF-MONITORING; BODY WEIGHT; DIABETES MELLITUS; TYPE 2; DRUG THERAPY; COMBINATION; FEMALE; GLUCAGON-LIKE PEPTIDE 1; HUMANS; HYPOGLYCEMIA; INFUSIONS; SUBCUTANEOUS; INSULIN; MALE; MEALS; MIDDLE AGED; OBESITY; OXYNTOMODULIN; PEPTIDE YY; POSTPRANDIAL PERIOD; PREDIABETIC STATE; SINGLE-BLIND METHOD; WEIGHT LOSS; FRUCTOSAMINE; GLUCAGON LIKE PEPTIDE 1; GLUCOSE; INSULI…	SECTION OF INVESTIGATIVE MEDICINE, IMPERIAL COLLEGE LONDON, LONDON, UNITED KINGDOM; IMPERIAL CLINICAL TRIALS UNIT, IMPERIAL COLLEGE LONDON, LONDON, UNITED KINGDOM; DEPARTMENT OF CLINICAL BIOCHEMISTRY, RIGSHOSPITALET, COPENHAGEN, DENMARK; NOVO NORDISK FOUNDATION CENTER FOR PROTEIN RESEARCH, FACULTY OF HEALTH AND MEDICAL SCIENCES, UNIVERSITY OF COPENHAGEN, COPENHAGEN, DENMARK; SCHOOL OF MEDICINE, U…	OBJECTIVE ROUX-EN-Y GASTRIC BYPASS (RYGB) AUGMENTS POSTPRANDIAL SECRETION OF GLUCAGON-LIKE PEPTIDE 1 (GLP-1), OXYNTOMODULIN (OXM), AND PEPTIDE YY (PYY). SUBCUTANEOUS INFUSION OF THESE HORMONES (“GOP”), MIMICKING POSTPRANDIAL LEVELS, REDUCES ENERGY INTAKE. OUR OBJECTIVE WAS TO STUDY THE EFFECTS OF GOP ON GLYCEMIA AND BODY WEIGHT WHEN GIVEN FOR 4 WEEKS TO PATIENTS WITH DIABETES AND OBESITY. RESEARC…			01495992	DIABETES CARE	DIABETES CARE	ENGLISH		1446 – 1453	AMERICAN DIABETES ASSOCIATION INC.		95	BEHARY P;THARAKAN G;ALEXIADOU K;JOHNSON N;WEWER A N;KENKRE J;CUENCO J;HOPE D;ANYIAM O;CHOUDHURY S;ALESSIMII H;PODDAR A;MINNION J;DOYLE C;FROST G;LE R C;PURKAYASTHA S;MOORTHY K;DHILLO W;HOLST J;AHMED A;TOBY P A;BLOOM S;TAN T	10.2337/dc19-0449	COMBINED GLP1 OXYNTOMODULIN AND PEPTIDE YY IMPROVES BODY WEIGHT AND GLYCEMIA IN OBESITY AND PREDIABETES/TYPE 2 DIABETES: A RANDOMIZED SINGLEBLINDED PLACEBOCONTROLLED STUDY	1	2019	BEHARY PREESHILA;THARAKAN GEORGE;ALEXIADOU KLEOPATRA;JOHNSON NICHOLAS;WEWER ALBRECHTSEN NICOLAI J;KENKRE JULIA;CUENCO JOYCELINE;HOPE DAVID;ANYIAM OLUWASEUN;CHOUDHURY SIRAZUM;ALESSIMII HAYA;PODDAR ANKUR;MINNION JAMES;DOYLE CHEDIE;FROST GARY;LE ROUX CAREL;PURKAYASTHA SANJAY;MOORTHY KRISHNA;DHILLO WALJIT;HOLST JENS J;AHMED AHMED R;TOBY PREVOST A;BLOOM STEPHEN R;TAN TRICIA M	T.M. TAN; SECTION OF INVESTIGATIVE MEDICINE, IMPERIAL COLLEGE LONDON, LONDON, UNITED KINGDOM; EMAIL: T.TAN@IMPERIAL.AC.UK		IMPERIAL COLLEGE LONDON;IMPERIAL COLLEGE LONDON;RIGSHOSPITALET;UNIVERSITY OF COPENHAGEN;UNIVERSITY COLLEGE DUBLIN;IMPERIAL COLLEGE HEALTHCARE NATIONAL HEALTH SERVICE TRUST;UNIVERSITY OF COPENHAGEN	BEHARY P, 2019, DIABETES CARE	https://www.scopus.com/inward/record.uri?eid=2-s2.0-85070183624&doi=10.2337%2fdc19-0449&partnerID=40&md5=0e584917d1c35b949631f148f768b38a	SCOPUS
BILE ACIDS; FIBROBLAST GROWTH FACTOR 19; GLUCAGON-LIKE PEPTIDE-1; ROUX-EN-Y GASTRIC BYPASS; TYPE 2 DIABETES MELLITUS; ADULT; BILE ACIDS AND SALTS; BLOOD GLUCOSE; DIABETES MELLITUS; TYPE 2; FASTING; FEMALE; FIBROBLAST GROWTH FACTORS; GASTRIC BYPASS; HUMANS; HYPOGLYCEMIC AGENTS; MALE; MIDDLE AGED; OBESITY; MORBID; POSTPRANDIAL PERIOD; TREATMENT OUTCOME; BILE ACID; GLUCOSE; HEMOGLOBIN A1C; INSULIN; …	ADULT; BILE ACIDS AND SALTS; BLOOD GLUCOSE; DIABETES MELLITUS; TYPE 2; FASTING; FEMALE; FIBROBLAST GROWTH FACTORS; GASTRIC BYPASS; HUMANS; HYPOGLYCEMIC AGENTS; MALE; MIDDLE AGED; OBESITY; MORBID; POSTPRANDIAL PERIOD; TREATMENT OUTCOME; BILE ACID; FIBROBLAST GROWTH FACTOR 19; GLUCOSE; HEMOGLOBIN A1C; INSULIN; ANTIDIABETIC AGENT; BILE ACID; FGF19 PROTEIN; HUMAN; FIBROBLAST GROWTH FACTOR; GLUCOSE BL…	DEPARTMENT OF MEDICINE, COLUMBIA UNIVERSITY MEDICAL CENTER, 650 WEST 168TH ST, BLACK BUILDING, NEW YORK, 10032, NY, UNITED STATES; DIVISION OF BIOSTATISTICS, UNIVERSITY OF MINNESOTA, MINNEAPOLIS, MN, UNITED STATES; DEPARTMENT OF MEDICINE, UNIVERSITY OF MINNESOTA, MINNEAPOLIS, MN, UNITED STATES; DEPARTMENT OF SURGERY, COLUMBIA UNIVERSITY MEDICAL CENTER, NEW YORK, NY, UNITED STATES; DEPARTMENT OF S…	BACKGROUND: THIS STUDY AIMS TO QUANTIFY CHANGES IN FIBROBLAST GROWTH FACTOR 19 (FGF19) AND BILE ACIDS (BAS) IN PATIENTS WITH UNCONTROLLED TYPE 2 DIABETES RANDOMIZED TO ROUX-EN-Y GASTRIC BYPASS (RYGB) VS INTENSIVE MEDICAL MANAGEMENT (IMM) AND MATCHED FOR SIMILAR REDUCTION IN HBA1C AFTER 1 YEAR OF TREATMENT. METHODS: BLOOD SAMPLES WERE DRAWN FROM PATIENTS WHO UNDERWENT A TEST MEAL CHALLENGE BEFORE …			09608923	OBES. SURG.	OBESITY SURGERY	ENGLISH		957 – 965	SPRINGER NEW YORK LLC		95	SACHDEV S;WANG Q;BILLINGTON C;CONNETT J;AHMED L;INABNET W;CHUA S;IKRAMUDDIN S;KORNER J	10.1007/s11695-015-1834-0	FGF 19 AND BILE ACIDS INCREASE FOLLOWING ROUXENY GASTRIC BYPASS BUT NOT AFTER MEDICAL MANAGEMENT IN PATIENTS WITH TYPE 2 DIABETES	1	2016	SACHDEV SAACHI;WANG QI;BILLINGTON CHARLES;CONNETT JOHN;AHMED LEAQUE;INABNET WILLIAM;CHUA STREAMSON;IKRAMUDDIN SAYEED;KORNER JUDITH	J. KORNER; DEPARTMENT OF MEDICINE, COLUMBIA UNIVERSITY MEDICAL CENTER, NEW YORK, 650 WEST 168TH ST, BLACK BUILDING, 10032, UNITED STATES; EMAIL: JK181@COLUMBIA.EDU	Bile acids; Fibroblast growth factor 19; Glucagon-like peptide-1; Roux-en-Y gastric bypass; Type 2 diabetes mellitus	COLUMBIA UNIVERSITY MEDICAL CENTER;UNIVERSITY OF MINNESOTA;UNIVERSITY OF MINNESOTA;COLUMBIA UNIVERSITY MEDICAL CENTER;MOUNT SINAI MEDICAL CENTER;ALBERT EINSTEIN COLLEGE OF MEDICINE;UNIVERSITY OF MINNESOTA	SACHDEV S, 2016, OBES SURG	https://www.scopus.com/inward/record.uri?eid=2-s2.0-84938834464&doi=10.1007%2fs11695-015-1834-0&partnerID=40&md5=752f5337709332144ef08ff56760e78a	SCOPUS
BARIATRIC SURGERY; BMI >50 KG/M<SUP>2</SUP>; DIABETES; LIPID DISORDER; LONG LIMB GASTRIC BYPASS; SUPER-OBESE; BLOOD GLUCOSE; BODY MASS INDEX; DIABETES MELLITUS; TYPE 2; DYSLIPIDEMIAS; FEMALE; FOLLOW-UP STUDIES; GASTRIC BYPASS; HUMANS; HYDROXYMETHYLGLUTARYL-COA REDUCTASE INHIBITORS; HYPOGLYCEMIC AGENTS; LAPAROSCOPY; MALE; MIDDLE AGED; OBESITY; MORBID; VITAMINS; WEIGHT LOSS; INSULIN; ORAL ANTIDIABE…	BLOOD GLUCOSE; BODY MASS INDEX; DIABETES MELLITUS; TYPE 2; DYSLIPIDEMIAS; FEMALE; FOLLOW-UP STUDIES; GASTRIC BYPASS; HUMANS; HYDROXYMETHYLGLUTARYL-COA REDUCTASE INHIBITORS; HYPOGLYCEMIC AGENTS; LAPAROSCOPY; MALE; MIDDLE AGED; OBESITY; MORBID; VITAMINS; WEIGHT LOSS; INSULIN; ORAL ANTIDIABETIC AGENT; ADULT; ARTICLE; BODY MASS; CLINICAL TRIAL; COMORBIDITY; CONTROLLED CLINICAL TRIAL; CONTROLLED STUDY…	CENTER FOR THE SURGICAL TREATMENT OF MORBID OBESITY, HOSPITAL SÃO CAMILO, SÃO PAULO, SÃO PAULO, BRAZIL	BACKGROUND: SUPER-OBESE PATIENTS CAN ACHIEVE ADEQUATE WEIGHT LOSS WITH LONG LIMB ROUX-EN-Y GASTRIC BYPASS (RYGB). THESE PATIENTS, HOWEVER, MIGHT NEED LONGER INTESTINAL LIMBS TO CONTROL CO-MORBIDITIES SUCH AS TYPE 2 DIABETES, LIPID DISORDERS, HYPERTENSION, SLEEP APNEA, AND GASTROESOPHAGEAL REFLUX DISORDER. METHODS: A TOTAL OF 105 PATIENTS WITH A BODY MASS INDEX OF ≥50 KG/M2 WERE RANDOMLY DIVIDED I…			15507289	SURG. OBES. RELAT. DIS.	SURGERY FOR OBESITY AND RELATED DISEASES	ENGLISH		521 – 525			95	PINHEIRO J;SCHIAVON C;PEREIRA P;CORREA J;NOUJAIM P;COHEN R	10.1016/j.soard.2007.12.016	LONGLONG LIMB ROUXENY GASTRIC BYPASS IS MORE EFFICACIOUS IN TREATMENT OF TYPE 2 DIABETES AND LIPID DISORDERS IN SUPEROBESE PATIENTS	1	2008	PINHEIRO JOSE S;SCHIAVON CARLOS A;PEREIRA PAULO B;CORREA JOSE L;NOUJAIM PATRICIA;COHEN RICARDO	J.S. PINHEIRO; CENTER FOR THE SURGICAL TREATMENT OF MORBID OBESITY, HOSPITAL SÃO CAMILO, SÃO PAULO, SÃO PAULO, BRAZIL; EMAIL: JCPINHEIROFILHO@HOTMAIL.COM	Bariatric surgery; BMI >50 kg/m<sup>2</sup>; Diabetes; Lipid disorder; Long limb gastric bypass; Super-obese	CENTER FOR THE SURGICAL TREATMENT OF MORBID OBESITY	PINHEIRO J, 2008, SURG OBES RELAT DIS	https://www.scopus.com/inward/record.uri?eid=2-s2.0-47549118468&doi=10.1016%2fj.soard.2007.12.016&partnerID=40&md5=c05e62a297c158b3e22c0865bbf5909b	SCOPUS
MORBID OBESITY; VITAMIN D DEPLETION; PARATHYROID HORMONE; BARIATRIC; SURGERY; GASTRIC BYPASS; HYPERTENSION; BONE MINERAL DENSITY; METABOLIC; BONE DISEASE; NUTRITION EXAMINATION SURVEY; METABOLIC BONE-DISEASE; 3RD; NATIONAL-HEALTH; CALCIUM-ABSORPTION; PARATHYROID-HORMONE; MORBID-OBESITY; BLOOD-PRESSURE; WOMEN; 25-HYDROXYVITAMIN-D	NUTRITION EXAMINATION SURVEY; METABOLIC BONE-DISEASE; 3RD; NATIONAL-HEALTH; CALCIUM-ABSORPTION; PARATHYROID-HORMONE; MORBID-OBESITY; BLOOD-PRESSURE; SURGERY; WOMEN; 25-HYDROXYVITAMIN-D	CARLIN, AM (CORRESPONDING AUTHOR), HENRY FORD HOSP, DIV GEN SURG, DETROIT, MI 48202 USA.; CARLIN, ARTHUR M.; YAGER, KELLI M., HENRY FORD HOSP, DIV GEN SURG, DETROIT, MI 48202 USA.; RAO, D. SUDHAKER; PARIKH, NAYANA J., HENRY FORD HOSP, BONE \& MINERAL RES LAB, DETROIT, MI 48202 USA.; KAPKE, ALISSA, HENRY FORD HOSP, DEPT BIOSTAT, DETROIT, MI 48202 USA.	BACKGROUND: A HIGH PREVALENCE (60\%) OF VITAMIN D (VITD) DEPLETION, DEFINED AS A SERUM 25-HYDROXYVITAMIN D LEVEL OF <= 20 NG/ML, IS PRESENT IN PREOPERATIVE MORBIDLY OBESE PATIENTS. DESPITE DAILY SUPPLEMENTATION WITH 800 IU VITD AND 1500 MG CALCIUM AFTER ROUX-EN-Y GASTRIC BYPASS (RYGB), VITD DEPLETION PERSISTS IN ALMOST ONE HALF (44\%) OF PATIENTS. HOWEVER, THE OPTIMAL MANAGEMENT OF VITD DEPLETION…	360 PARK AVE SOUTH, NEW YORK, NY 10010-1710 USA	HENRY FORD HEALTH SYSTEM; HENRY FORD HOSPITAL; HENRY FORD HEALTH SYSTEM; HENRY FORD HOSPITAL; HENRY FORD HEALTH SYSTEM; HENRY FORD HOSPITAL	1550-7289	SURG. OBES. RELAT. DIS.	SURGERY FOR OBESITY AND RELATED DISEASES	ENGLISH		444-449	ELSEVIER SCIENCE INC	SURGERY	94	CARLIN A;RAO D;YAGER K;PARIKH ;NAYANA J N;KAPKE A	10.1007/s10120-020-01040-0	TREATMENT OF VITAMIN D DEPLETION AFTER ROUXENY GASTRIC BYPASS: A RANDOMIZED PROSPECTIVE CLINICAL TRIAL	1	2009	CARLIN ARTHUR M;RAO D SUDHAKER;YAGER KELLI M;PARIKH; NAYANA J;KAPKE ALISSA	CARLIN, AM (CORRESPONDING AUTHOR), HENRY FORD HOSP, DIV GEN SURG, DETROIT, MI 48202 USA	Morbid obesity; Vitamin D depletion; Parathyroid hormone; Bariatric; surgery; Gastric bypass; Hypertension; Bone mineral density; Metabolic; bone disease	HENRY FORD HOSP;HENRY FORD HOSP;HENRY FORD HOSP;HENRY FORD HOSP	CARLIN A, 2009, SURG OBES RELAT DIS		ISI
ABSORPTION; ADOLESCENT; ADULT; AREA UNDER CURVE; BIOLOGICAL AVAILABILITY; DIABETES MELLITUS; FEMALE; GASTRIC BYPASS; HUMANS; MALE; METFORMIN; MIDDLE AGED; RECURRENCE; AREA UNDER THE CURVE; ARTICLE; CLINICAL ARTICLE; CONTROLLED CLINICAL TRIAL; CONTROLLED STUDY; DISTRIBUTION VOLUME; DRUG ABSORPTION; DRUG BIOAVAILABILITY; DRUG BLOOD LEVEL; DRUG CLEARANCE; DRUG HALF LIFE; DRUG URINE LEVEL; HUMAN; MAX…	ABSORPTION; ADOLESCENT; ADULT; AREA UNDER CURVE; BIOLOGICAL AVAILABILITY; DIABETES MELLITUS; FEMALE; GASTRIC BYPASS; HUMANS; MALE; METFORMIN; MIDDLE AGED; RECURRENCE; METFORMIN; ADULT; AREA UNDER THE CURVE; ARTICLE; CLINICAL ARTICLE; CONTROLLED CLINICAL TRIAL; CONTROLLED STUDY; DISTRIBUTION VOLUME; DRUG ABSORPTION; DRUG BIOAVAILABILITY; DRUG BLOOD LEVEL; DRUG CLEARANCE; DRUG HALF LIFE; DRUG URINE…	DEPARTMENT OF MEDICINE, UNIVERSITY OF ALBERTA, EDMONTON, AB, CANADA; DEPARTMENT OF PHARMACY, UNIVERSITY OF ALBERTA, EDMONTON, AB, CANADA; NORTHERN ALBERTA CLINICAL TRIALS CENTRE, EDMONTON, AB, CANADA; DEPARTMENT OF SURGERY, UNIVERSITY OF ALBERTA, ROYAL ALEXANDRA HOSPITAL, EDMONTON, AB, CANADA	OBJECTIVE - USE OF GASTRIC BYPASS SURGERY IS COMMON AND INCREASING. OVER 40% OF PATIENTS IN DIABETES REMISSION AFTER GASTRIC BYPASS SURGERY MAY REDEVELOP DIABETES WITHIN 5 YEARS. METFORMIN, THE FIRST-LINE DRUG FOR DIABETES, HAS LOW BIOAVAILABILITY AND SLOW, INCOMPLETE GASTROINTESTINAL ABSORPTION. WE HYPOTHESIZED THAT GASTRIC BYPASS WOULD FURTHER REDUCE THE ABSORPTION AND BIOAVAILABILITY OF METFOR…			19355548	DIABETES CARE	DIABETES CARE	ENGLISH		1295 – 1300			93	PADWAL R;GABR R;SHARMA A;LANGKAAS L;BIRCH D;KARMALI S;BROCKS D	10.2337/dc10-2140	EFFECT OF GASTRIC BYPASS SURGERY ON THE ABSORPTION AND BIOAVAILABILITY OF METFORMIN	1	2011	PADWAL RAJ S;GABR RANIAH Q;SHARMA ARYA M;LANGKAAS LEE-ANN;BIRCH DAN W;KARMALI SHAHZEER;BROCKS DION R	R.S. PADWAL; DEPARTMENT OF MEDICINE, UNIVERSITY OF ALBERTA, EDMONTON, AB, CANADA; EMAIL: RPADWAL@UALBERTA.CA		UNIVERSITY OF ALBERTA;UNIVERSITY OF ALBERTA;NORTHERN ALBERTA CLINICAL TRIALS CENTRE;UNIVERSITY OF ALBERTA	PADWAL R, 2011, DIABETES CARE	https://www.scopus.com/inward/record.uri?eid=2-s2.0-80051985491&doi=10.2337%2fdc10-2140&partnerID=40&md5=e6b21d7092822c51673076c5848958a0	SCOPUS
BARIATRIC SURGERY; BOVINE PERICARDIUM; GASTRIC BYPASS; LAPAROSCOPY; MORBID OBESITY; PERI-STRIPS DRY; STAPLE-LINE LEAKS; ADULT; AGED; ANASTOMOSIS; ROUX-EN-Y; ANIMALS; CATTLE; FEMALE; GASTRIC FISTULA; HUMANS; MALE; MIDDLE AGED; OBESITY; MORBID; PERICARDIUM; SURGICAL STAPLING; ARTICLE; CLINICAL TRIAL; CONTROLLED CLINICAL TRIAL; CONTROLLED STUDY; HUMAN; LAPAROSCOPIC SURGERY; MAJOR CLINICAL STUDY; POS…	ADULT; AGED; ANASTOMOSIS; ROUX-EN-Y; ANIMALS; CATTLE; FEMALE; GASTRIC BYPASS; GASTRIC FISTULA; HUMANS; LAPAROSCOPY; MALE; MIDDLE AGED; OBESITY; MORBID; PERICARDIUM; SURGICAL STAPLING; ADULT; AGED; ARTICLE; BARIATRIC SURGERY; CATTLE; CLINICAL TRIAL; CONTROLLED CLINICAL TRIAL; CONTROLLED STUDY; FEMALE; HUMAN; LAPAROSCOPIC SURGERY; MAJOR CLINICAL STUDY; MALE; MORBID OBESITY; PERICARDIUM; POSTOPERATI…	DEPARTMENT OF SURGERY, OBESITY CONSULT CENTER, CTR. MINIMALLY INVASIVE OBESITY S., BOSTON, MA, UNITED STATES; TUFTS-NEW ENGLAND MEDICAL CENTER, BOX 900, BOSTON, MA 02111, 750 WASHINGTON ST., UNITED STATES	BACKGROUND: STAPLE-LINE LEAKAGE IS A POTENTIALLY DEVASTATING COMPLICATION OF ROUX-EN-Y GASTRIC BYPASS (RYGBP). BOVINE PERICARDIAL STRIPS (BPS) HAVE BEEN USED TO REINFORCE STAPLE-LINES IN PULMONARY RESECTIONS AND HAVE BEEN SHOWN TO DECREASE AIR-LEAKS. THIS STUDY EXAMINED THE USE OF BPS TO DECREASE GASTRIC STAPLE-LINE LEAKS. METHODS: 250 CONSECUTIVE PATIENTS UNDERGOING LAPAROSCOPIC RYGBP HAD BPS US…			09608923	OBES. SURG.	OBESITY SURGERY	ENGLISH		37 – 44			93	SHIKORA S;KIM J;TARNOFF M	10.1381/096089203321136566	REINFORCING GASTRIC STAPLELINES WITH BOVINE PERICARDIAL STRIPS MAY DECREASE THE LIKELIHOOD OF GASTRIC LEAK AFTER LAPAROSCOPIC ROUXENY GASTRIC BYPASS	1	2003	SHIKORA SCOTT A;KIM JULIE J;TARNOFF MICHAEL E	S.A. SHIKORA; TUFTS-NEW ENGLAND MEDICAL CENTER, BOX 900, BOSTON, MA 02111, 750 WASHINGTON ST., UNITED STATES; EMAIL: SSHIKORA@LIFESPAN.ORG	Bariatric surgery; Bovine pericardium; Gastric bypass; Laparoscopy; Morbid obesity; Peri-Strips Dry; Staple-line leaks	CTR. MINIMALLY INVASIVE OBESITY S.;TUFTS-NEW ENGLAND MEDICAL CENTER	SHIKORA S, 2003, OBES SURG	https://www.scopus.com/inward/record.uri?eid=2-s2.0-0037328068&doi=10.1381%2f096089203321136566&partnerID=40&md5=40a2f8a173ed3d0468089affaafd642e	SCOPUS
BARIATRIC SURGERY; MILD OBESITY; ROUX-EN-Y GASTRIC BYPASS; SLEEVE GASTRECTOMY; TYPE 2 DIABETES; ADULT; BLOOD GLUCOSE; BODY MASS INDEX; C-PEPTIDE; DIABETES MELLITUS; TYPE 2; FEMALE; GASTRECTOMY; GASTRIC BYPASS; HEMOGLOBIN A; GLYCOSYLATED; HUMANS; LAPAROSCOPY; MALE; MIDDLE AGED; OBESITY; MORBID; PROSPECTIVE STUDIES; TREATMENT OUTCOME; WEIGHT LOSS; C PEPTIDE; GLUCOSE BLOOD LEVEL; GLYCOSYLATED HEMOGL…	ADULT; BLOOD GLUCOSE; BODY MASS INDEX; C-PEPTIDE; DIABETES MELLITUS; TYPE 2; FEMALE; GASTRECTOMY; GASTRIC BYPASS; HEMOGLOBIN A; GLYCOSYLATED; HUMANS; LAPAROSCOPY; MALE; MIDDLE AGED; OBESITY; MORBID; PROSPECTIVE STUDIES; TREATMENT OUTCOME; WEIGHT LOSS; C PEPTIDE; GLUCOSE BLOOD LEVEL; GLYCOSYLATED HEMOGLOBIN; ADULT; BLOOD; BODY MASS; COMPLICATION; CONTROLLED STUDY; FEMALE; GASTRECTOMY; GASTRIC BYPA…	DEPARTMENT OF GENERAL SURGERY, FIRST AFFILIATED HOSPITAL OF JINAN UNIVERSITY, GUANGZHOU, 510630, CHINA	BACKGROUND: TO COMPARE LONG TERM EFFECTS OF TWO BARIATRIC PROCEDURES FOR CHINESE TYPE 2 DIABETES MELLITUS (T2DM) PATIENTS WITH A BODY MASS INDEX (BMI) OF 28-35 KG/M2. METHODS: SIXTY FOUR T2DM PATIENTS WITH GLYCATED HEMOGLOBIN A1C (HBA1C) 蠇 7.0 % WERE RANDOMLY ASSIGNED TO RECEIVE LAPAROSCOPIC SLEEVE GASTRECTOMY (SG) OR ROUX-EN-Y GASTRIC BYPASS (RYGB) PROCEDURE. WEIGHT, PERCENTAGE OF EXCESS WEIGHT …			14712482	BMC SURG.	BMC SURGERY	ENGLISH			BIOMED CENTRAL LTD.		93	YANG J;WANG C;CAO G;YANG W;YU S;ZHAI H;PAN Y	10.1186/s12893-015-0074-5	LONGTERM EFFECTS OF LAPAROSCOPIC SLEEVE GASTRECTOMY VERSUS ROUXENY GASTRIC BYPASS FOR THE TREATMENT OF CHINESE TYPE 2 DIABETES MELLITUS PATIENTS WITH BODY MASS INDEX 2835 KG/M2	1	2015	YANG JINGGE;WANG CUNCHUAN;CAO GUO;YANG WAH;YU SHUQING;ZHAI HENING;PAN YUNLONG	C. WANG; DEPARTMENT OF GENERAL SURGERY, FIRST AFFILIATED HOSPITAL OF JINAN UNIVERSITY, GUANGZHOU, 510630, CHINA; EMAIL: TWCC@JNU.EDU.CN	Bariatric surgery; Mild obesity; Roux-en-Y gastric bypass; Sleeve gastrectomy; Type 2 diabetes	FIRST AFFILIATED HOSPITAL OF JINAN UNIVERSITY	YANG J, 2015, BMC SURG	https://www.scopus.com/inward/record.uri?eid=2-s2.0-84937411322&doi=10.1186%2fs12893-015-0074-5&partnerID=40&md5=755ac1ab6def9cb75c6a38a2ab2afe1a	SCOPUS
[truncated: 935 more rows]
