# Supplementary material for: Global Trends in Scientific Output of Clinical Trials on Gastric Bypass: A Machine Learning–Based Bibliometric Study
Source: Research Square preprint supplement (doi:10.21203/rs.3.rs-8854344/v1), 2026-02-18
Supplement: Supplementary file 4 [file cf5a796a9c62058d1bf3c464.docx]

**Supplementary Material 1 – Search Strategy**

The literature search strategies were developed a priori and applied consistently across all selected databases. Searches were conducted for studies published between 2001 and 2024. All queries were executed in the title, abstract, and keyword fields of each database to maximize retrieval sensitivity. The search combined terminology for gastric bypass procedures with terms related to clinical trial designs.

**Web of Science**

Coverage: 2001–2024

Fields Searched: Title, Abstract, Keywords

Search Strategy:

(“gastric bypass” OR “roux-en-y gastric bypass” OR “RYGB” OR “Laparoscopic Roux-en-Y gastric bypass” OR “LRYGB” OR “OAGB” OR “One Anastomosis Gastric Bypass” OR “Mini-Gastric Bypass”) OR (“Single Anastomosis Gastric Bypass”) AND ("clinical trial" OR "clinical trials" OR "randomized controlled trial" OR "randomised controlled trial" OR "RCT" OR "interventional study" OR "controlled clinical trial" OR "controlled trial" OR "clinical research" OR "clinical investigation" OR "therapeutic trial" OR "treatment trial").

**PubMed/MEDLINE**

Coverage: 2001–2024

Fields Searched: Title, Abstract, Keywords

Search Strategy:

(“gastric bypass” OR “roux-en-y gastric bypass” OR “RYGB” OR “Laparoscopic Roux-en-Y gastric bypass” OR “LRYGB” OR “OAGB” OR “One Anastomosis Gastric Bypass” OR “Mini-Gastric Bypass”) OR (“Single Anastomosis Gastric Bypass”) AND ("clinical trial" OR "clinical trials" OR "randomized controlled trial" OR "randomised controlled trial" OR "RCT" OR "interventional study" OR "controlled clinical trial" OR "controlled trial" OR "clinical research" OR "clinical investigation" OR "therapeutic trial" OR "treatment trial")

**Scopus**

Coverage: 2001–2024

Fields Searched: Title, Abstract, Keywords

Search Strategy:

(“gastric bypass” OR “roux-en-y gastric bypass” OR “RYGB” OR “Laparoscopic Roux-en-Y gastric bypass” OR “LRYGB” OR “OAGB” OR “One Anastomosis Gastric Bypass” OR “Mini-Gastric Bypass”) OR (“Single Anastomosis Gastric Bypass”) AND ("clinical trial" OR "clinical trials" OR "randomized controlled trial" OR "randomised controlled trial" OR "RCT" OR "interventional study" OR "controlled clinical trial" OR "controlled trial" OR "clinical research" OR "clinical investigation" OR "therapeutic trial" OR "treatment trial")
